# Supplementary material
Source: Research Square preprint supplement (doi:10.21203/rs.3.rs-8751068/v1)
Supplement: Supplementary file 1 [file 17a765f6fcd4d797182329e2.xlsx]

## Sheet: Supplementary data Table 1
Supplementary data Table1. List of PCR primers
gene	Type of primers	Primer sequence (5’-3’)
HORVU.MOREX.r3.5HG0511210	Coding sequence primer	M1-F ATGGGGCGCGGGAAGGTGCA
		M1-R TCAGCCGTTGATGTGGCTCACCATC
HORVU.MOREX.r3.5HG0511210	Promoter region primer	M2-F CATTTCCTGTTTCGTCCCGCGC
		M2-R CCAGCTCCGCCATCGATTCTAA

## Sheet: Supplementary data Table 2
Supplementary data Table 2.Bin marker typing and corresponding physical locations of 172 progeny lines
Bin Marker	start	end	length	Bin marker typing of 172 progeny lines
				YJ01	YJ02	YJ03	YJ04	YJ05	YJ06	YJ07	YJ08	YJ09	YJ10	YJ11	YJ12	YJ13	YJ14	YJ15	YJ16	YJ17	YJ18	YJ19	YJ20	YJ21	YJ22	YJ23	YJ24	YJ25	YJ26	YJ27	YJ28	YJ29	YJ30	YJ31	YJ32	YJ33	YJ34	YJ35	YJ36	YJ37	YJ38	YJ39	YJ40	YJ41	YJ42	YJ43	YJ44	YJ45	YJ46
AM1	1	664299	664298	2	2	0	0	0	2	-1	0	2	0	2	2	0	0	2	0	2	0	0	0	0	0	2	0	0	0	2	0	0	2	0	2	2	0	0	2	0	0	2	0	2	2	2	2	2	2
AM2	664300	708151	43851	2	2	0	0	2	2	-1	2	2	0	2	2	0	0	2	0	2	0	0	0	0	0	2	0	0	0	2	0	0	2	0	2	2	0	0	2	0	0	2	0	2	2	2	2	2	2
AM4	708152	1129385	421233	2	2	0	0	2	2	-1	2	2	0	2	2	0	0	2	0	2	0	0	0	0	0	2	0	0	0	2	0	0	2	0	2	2	0	0	2	0	0	2	0	2	2	2	2	2	2
AM3	1129386	1750678	621292	2	2	0	0	2	2	-1	2	2	0	2	2	0	0	2	0	2	0	0	0	0	0	2	0	0	0	2	0	0	2	0	2	2	0	0	2	0	0	2	0	2	2	2	2	2	2
AM5	1750679	2112740	362061	2	2	0	0	2	2	-1	2	2	0	2	2	0	0	2	0	2	0	0	0	0	0	2	0	0	0	2	0	0	2	0	2	2	0	0	2	0	0	2	0	2	2	2	2	2	2
AM6	2112741	2177005	64264	2	2	0	0	2	2	-1	2	2	0	2	2	0	0	2	0	2	0	0	0	0	0	2	0	0	0	2	0	0	2	0	2	2	0	0	2	0	0	2	0	2	2	2	2	2	2
AM7	2177006	2273380	96374	2	2	0	0	2	2	-1	2	2	0	2	2	0	0	2	0	2	0	0	0	0	0	2	0	0	2	2	0	0	2	0	2	2	0	0	2	0	0	2	0	2	2	2	2	2	2
AM8	2273381	2310664	37283	2	2	0	0	2	2	-1	2	2	0	2	2	0	0	2	0	2	0	0	0	0	0	2	0	0	2	2	0	0	2	0	2	2	0	0	2	0	0	2	0	2	2	2	2	2	2
AM9	2310665	2386622	75957	2	2	0	0	2	2	-1	2	2	0	2	2	0	0	2	0	2	0	0	0	0	0	2	0	0	2	2	0	0	2	0	2	2	0	0	2	0	0	2	0	2	2	2	2	2	2
AM10	2386623	2782715	396092	2	2	0	0	2	2	-1	2	2	0	2	2	0	0	2	0	2	0	0	0	0	0	2	0	0	2	-1	0	0	2	0	2	2	0	0	2	0	0	2	0	2	2	2	2	2	2
AM12	2782716	2841292	58576	2	2	0	0	2	2	-1	2	2	0	2	2	0	0	2	0	2	0	0	0	0	0	2	0	0	2	-1	0	0	2	0	2	2	0	0	2	0	0	2	0	2	2	2	2	2	2
AM11	2841293	3019451	178158	2	2	0	0	2	2	-1	2	2	0	2	2	0	0	2	0	2	0	0	0	0	0	2	0	0	2	-1	0	0	2	0	2	2	0	0	2	0	0	2	0	2	2	2	2	2	2
AM13	3019452	3368545	349093	2	2	0	0	2	2	-1	2	2	0	2	2	0	0	2	0	2	0	0	0	0	0	2	0	0	2	-1	0	0	2	0	2	2	0	0	2	0	0	2	0	2	2	2	2	2	2
AM14	3368546	3582970	214424	2	2	0	0	2	2	-1	2	2	0	2	2	0	0	2	0	2	0	0	0	0	0	2	0	0	2	-1	0	0	2	0	2	2	0	0	2	0	0	2	0	2	2	2	2	2	2
AM15	3582971	4927820	1344849	2	2	0	0	2	2	-1	2	2	0	2	2	0	0	2	0	2	0	0	0	0	0	2	0	0	2	-1	0	0	2	0	2	2	0	0	2	0	0	2	0	2	2	2	2	2	2
AM16	4927821	5144377	216556	2	2	0	0	2	2	-1	2	2	0	2	2	0	0	2	0	2	0	0	0	0	0	2	0	0	2	-1	0	0	2	0	2	2	0	0	2	0	0	2	0	2	2	2	2	2	2
AM17	5144378	5380989	236611	2	2	0	0	2	2	-1	2	2	0	2	2	0	0	2	0	2	0	0	0	0	0	2	0	0	2	-1	0	0	2	0	2	2	0	0	2	0	0	2	0	2	2	2	2	2	2
AM18	5380990	5395838	14848	2	2	0	0	2	2	-1	2	2	0	2	2	0	0	2	0	2	0	0	0	0	0	2	0	0	2	-1	0	0	2	0	2	2	0	0	2	0	0	2	0	2	2	2	2	2	2
AM19	5395839	5404822	8983	2	2	0	0	2	2	-1	2	2	0	2	2	0	0	2	0	2	0	0	0	0	0	2	0	0	2	2	0	0	2	0	2	2	0	0	2	0	0	2	0	2	2	2	2	2	2
AM20	5404823	5553140	148317	2	2	0	0	2	2	-1	2	2	0	2	2	0	0	2	0	2	0	0	0	0	0	2	0	0	2	2	0	0	2	0	2	2	0	0	2	0	0	2	0	2	2	2	2	2	2
AM21	5553141	7779358	2226217	2	2	0	0	2	2	-1	2	2	0	2	2	0	0	2	0	2	0	0	0	0	0	2	0	0	2	2	0	0	2	0	2	2	0	0	2	0	0	2	0	2	2	2	2	2	2
AM22	7779359	8345123	565764	2	2	0	0	2	2	-1	2	2	0	2	2	0	0	2	0	2	0	0	0	0	0	2	0	0	2	2	0	0	2	0	2	2	0	0	2	0	0	2	0	2	2	2	2	2	2
AM23	8345124	8372264	27140	2	2	0	0	0	2	-1	2	2	-1	0	2	0	0	2	2	2	0	0	0	0	0	2	0	2	0	2	0	0	2	0	2	2	2	0	0	0	0	2	0	2	2	2	2	2	2
AM24	8372265	8968281	596016	2	2	0	0	0	2	-1	2	2	-1	0	2	0	0	2	2	2	0	0	0	0	0	2	0	2	0	2	0	0	2	0	2	2	2	0	0	0	0	2	0	2	2	2	2	2	2
AM25	8968282	9586313	618031	2	2	0	0	0	2	-1	2	2	-1	0	2	0	0	2	2	2	0	0	0	0	0	2	0	2	0	2	0	0	2	0	2	2	2	0	0	0	0	2	0	2	2	2	2	2	2
AM26	9586314	10483390	897076	2	2	0	0	0	2	-1	2	2	0	0	2	0	0	2	2	2	0	0	0	0	0	2	0	2	0	2	0	0	2	0	2	2	2	0	0	0	0	2	0	2	2	2	2	2	2
AM27	10483391	10522091	38700	2	2	0	0	0	2	-1	2	2	0	0	2	0	0	2	2	0	0	0	0	0	0	2	0	2	0	2	0	0	2	0	2	2	2	0	0	0	0	2	0	2	2	2	2	2	2
AM28	10522092	10531498	9406	2	2	0	0	0	2	-1	2	2	0	0	2	0	0	2	2	0	0	0	0	0	0	2	0	2	0	2	0	0	2	0	2	2	2	0	0	0	0	2	0	2	2	2	2	2	2
AM29	10531499	10568867	37368	2	2	0	2	0	2	-1	2	2	0	0	2	0	0	2	2	0	0	0	0	0	0	2	0	2	0	2	0	0	2	0	2	2	2	2	0	0	0	2	0	2	2	2	2	2	2
AM30	10568868	10821141	252273	2	2	0	2	0	2	-1	2	2	0	0	2	0	0	2	2	0	0	0	0	0	0	2	0	2	0	2	0	0	2	0	2	2	2	2	0	0	0	2	0	2	2	2	2	2	2
AM31	10821142	10849379	28237	2	2	0	2	0	2	-1	2	2	0	0	2	0	0	2	2	0	0	0	0	0	0	2	0	2	0	2	0	0	2	0	2	2	2	2	0	0	0	2	0	2	2	2	2	2	2
AM32	10849380	10875907	26527	2	2	0	2	0	2	-1	2	2	0	0	2	0	0	2	2	0	0	0	0	0	0	2	0	2	0	2	0	0	2	0	2	2	2	2	0	0	0	2	0	2	2	2	2	2	2
AM33	10875908	11084890	208982	2	2	0	2	0	2	-1	2	2	0	0	2	0	0	2	2	0	0	0	0	0	0	2	0	2	0	2	0	0	2	0	2	2	2	2	0	0	0	2	0	2	2	2	2	2	2
AM34	11084891	11246750	161859	2	2	0	2	0	2	0	2	2	0	0	2	0	0	2	2	0	0	0	0	0	0	2	0	2	0	2	0	0	2	0	2	2	2	2	0	0	0	2	0	2	2	2	2	2	2
AM35	11246751	11469002	222251	2	2	0	2	0	2	0	2	2	0	0	2	0	0	2	2	0	0	0	0	0	0	2	0	2	0	2	0	0	2	0	2	2	2	2	0	0	0	2	0	2	2	2	2	2	2
AM36	11469003	11499107	30104	2	2	0	2	0	2	0	2	2	-1	0	2	0	0	2	2	0	0	0	0	0	0	2	0	2	0	2	0	0	2	0	2	2	2	2	0	0	0	2	0	2	2	2	2	2	2
AM37	11499108	11520164	21056	2	2	0	2	0	2	0	2	2	-1	0	2	0	0	2	2	0	0	0	0	0	0	2	0	2	0	2	0	0	2	0	2	2	2	2	0	0	0	2	0	2	2	2	2	2	2
AM38	11520165	11629145	108980	2	2	0	2	0	2	0	2	2	-1	0	2	0	0	2	2	0	0	0	0	0	0	2	0	2	0	2	0	0	2	0	2	2	2	2	0	0	0	2	0	2	2	2	0	2	2
AM39	11629146	11639241	10095	2	2	0	2	0	2	0	2	2	-1	0	2	0	0	2	2	0	0	0	0	0	0	2	0	2	0	2	0	0	2	0	2	2	2	2	2	0	0	2	0	2	2	2	0	2	2
AM40	11639242	11809730	170488	2	2	0	2	0	2	0	2	2	-1	0	2	0	0	2	2	0	0	0	0	0	0	2	0	2	0	2	0	0	2	0	2	2	2	2	2	0	0	2	0	2	2	2	0	2	2
AM41	11809731	11891371	81640	2	2	0	2	0	2	0	2	2	-1	0	2	0	0	2	2	0	0	0	0	0	0	2	0	2	0	2	0	0	2	0	2	2	2	2	2	0	0	2	0	2	2	2	0	2	2
AM42	11891372	12111458	220086	2	2	0	2	0	2	0	2	2	-1	0	2	0	0	2	2	0	0	0	0	0	0	2	0	2	0	2	0	0	2	0	2	2	2	2	2	0	0	2	0	2	2	2	0	2	2
AM43	12111459	13197155	1085696	2	2	0	2	0	2	0	2	2	-1	0	2	0	0	2	2	0	0	0	0	0	0	2	0	2	0	2	0	0	2	0	2	2	2	2	2	0	0	2	0	2	2	2	0	2	2
AM44	13197156	13232928	35772	2	2	0	2	0	2	0	2	2	-1	0	2	0	0	2	2	0	0	0	0	0	0	2	0	2	0	2	0	0	2	0	2	2	2	2	2	0	0	2	0	2	2	2	0	2	2
AM45	13232929	13341972	109043	2	2	0	2	0	2	0	2	2	-1	0	2	0	0	2	2	0	0	0	0	0	0	2	0	2	0	2	0	0	2	0	2	2	2	2	2	0	0	2	0	2	2	2	0	2	2
AM46	13341973	13373338	31365	2	2	0	2	0	2	0	2	2	-1	0	2	0	0	2	2	0	0	0	0	0	0	2	0	2	0	2	0	0	2	0	2	2	2	2	2	0	0	2	0	2	2	2	0	2	2
AM47	13373339	13449321	75982	2	2	0	2	0	2	0	2	2	-1	0	2	0	0	2	2	0	0	0	0	0	0	2	0	2	0	2	0	0	2	0	2	2	2	2	2	0	0	2	0	2	2	2	0	2	2
AM48	13449322	14143315	693993	2	2	0	2	0	2	0	2	2	-1	0	2	0	2	2	2	0	0	0	0	0	0	2	0	2	0	2	0	0	2	0	2	2	2	2	2	0	0	2	0	2	2	2	0	2	2
AM49	14143316	14492591	349275	2	2	0	2	0	2	0	2	2	-1	0	2	0	2	2	2	0	0	0	0	0	0	2	0	2	0	2	0	0	2	0	2	2	2	2	2	0	0	2	0	2	2	2	0	2	2
AM51	14492592	14613645	121053	2	2	0	2	0	2	0	2	2	-1	0	2	0	2	2	2	0	0	0	0	0	0	2	-1	2	0	2	0	0	2	0	2	2	2	2	2	0	0	2	0	2	2	2	0	2	2
AM50	14613646	14724513	110867	2	2	0	2	0	2	0	2	2	-1	0	2	0	2	2	2	0	0	0	0	0	0	2	0	2	0	2	0	0	2	0	2	2	2	2	2	0	0	2	0	2	2	2	0	2	2
AM52	14724514	14738899	14385	2	2	0	2	0	2	0	2	2	-1	0	2	0	2	2	2	0	0	0	0	0	0	2	0	2	0	2	0	0	2	0	2	2	2	2	2	0	0	2	0	2	2	2	0	2	2
AM53	14738900	14788535	49635	2	2	0	2	0	2	0	2	2	-1	0	2	0	2	2	2	0	0	0	0	0	0	2	0	2	0	2	0	0	2	0	2	2	2	2	2	0	0	2	0	2	2	2	0	2	2
AM54	14788536	15082645	294109	2	2	0	2	0	2	0	2	2	-1	0	2	0	2	2	2	0	0	0	0	0	0	2	0	2	0	2	0	0	2	0	2	2	2	2	2	0	0	2	0	2	2	2	0	2	2
AM55	15082646	15210666	128020	2	2	0	2	0	2	0	2	2	-1	0	2	0	2	2	2	0	0	0	0	0	0	2	0	2	0	2	0	0	2	0	2	2	2	2	2	0	0	2	0	2	2	2	0	2	2
AM56	15210667	15256436	45769	2	2	0	2	0	2	0	2	2	-1	0	2	0	2	2	2	0	0	0	0	0	0	0	0	2	0	2	0	0	2	0	2	2	2	2	2	0	0	2	0	2	2	2	0	2	2
AM57	15256437	15333051	76614	2	2	0	2	0	2	0	2	2	-1	0	2	0	2	2	2	0	0	0	0	0	0	0	0	2	0	-1	0	0	2	0	2	2	2	2	2	0	0	2	0	2	2	2	0	2	2
AM58	15333052	15455112	122060	2	2	0	2	0	2	0	2	2	-1	0	2	0	2	2	2	0	0	0	0	0	0	0	0	2	0	-1	0	0	2	0	2	2	2	2	2	0	0	2	0	2	2	2	0	2	2
AM59	15455113	15486304	31191	2	2	0	2	0	2	0	2	2	-1	0	2	0	2	2	2	0	0	0	0	0	0	0	0	2	0	-1	0	0	2	0	2	2	2	2	2	0	0	2	0	2	2	2	0	2	2
AM60	15486305	15710922	224617	2	2	0	2	0	2	0	2	2	-1	0	2	0	2	2	2	0	0	0	0	0	0	0	0	2	0	2	0	0	2	0	2	2	2	2	2	0	0	2	0	2	2	2	0	2	2
AM61	15710923	15757532	46609	2	2	0	2	0	2	0	2	2	-1	0	2	0	2	2	2	0	0	0	0	0	0	0	0	0	0	2	0	0	2	0	2	2	2	2	2	0	0	2	0	2	2	2	0	2	2
AM62	15757533	15861781	104248	2	2	0	2	0	2	0	2	2	-1	0	2	0	2	2	2	0	0	0	0	0	0	0	0	0	0	2	0	0	2	0	2	2	2	2	2	0	0	2	0	2	2	2	0	2	2
AM63	15861782	16173077	311295	2	2	0	2	0	2	0	2	2	-1	0	2	0	2	2	2	0	0	0	0	0	0	0	0	0	0	2	0	0	2	0	2	2	2	2	2	0	0	2	0	2	2	2	0	2	2
AM64	16173078	16603492	430414	2	2	0	2	0	2	0	2	2	-1	0	2	0	2	2	2	0	0	0	0	0	0	0	0	0	0	2	0	0	2	0	2	2	2	2	2	0	0	2	0	2	2	2	0	2	2
AM65	16603493	16789914	186421	2	2	0	2	0	2	0	2	2	-1	0	2	0	2	2	2	0	0	0	0	0	0	0	0	0	0	2	0	0	2	0	2	2	2	2	2	0	0	2	0	2	2	2	0	2	2
AM66	16789915	16863203	73288	2	2	0	2	0	2	0	2	2	-1	0	2	0	2	2	2	0	0	0	0	0	0	0	0	0	0	2	0	0	2	0	2	2	2	2	2	0	0	2	0	2	2	2	0	2	2
AM67	16863204	17165885	302681	2	2	0	2	0	2	0	2	2	-1	0	2	0	2	2	2	0	0	0	0	0	0	0	0	0	0	2	0	0	2	0	2	2	2	2	2	0	0	2	0	2	2	2	0	2	2
AM68	17165886	17493566	327680	2	2	0	2	0	2	0	2	2	-1	0	2	0	2	2	2	0	0	0	0	0	0	0	0	0	0	2	0	0	2	0	2	2	2	2	2	0	0	2	0	2	2	2	0	2	2
AM69	17493567	17510378	16811	2	2	0	2	0	2	0	2	2	-1	0	2	0	2	2	2	0	0	0	0	0	0	0	0	0	0	-1	0	0	2	0	2	2	2	2	2	0	0	2	0	2	2	2	0	2	2
AM70	17510379	19612104	2101725	2	2	0	2	0	2	0	2	2	-1	0	2	0	2	2	2	0	0	0	0	0	0	0	0	0	0	-1	0	0	2	0	2	2	2	2	2	0	0	2	0	2	2	2	0	2	2
AM71	19612105	19696790	84685	2	2	0	2	0	2	0	2	2	-1	0	2	0	2	2	2	0	0	0	0	0	0	0	0	0	0	-1	0	0	2	0	2	2	2	2	2	0	0	2	0	2	2	2	0	2	2
AM72	19696791	19836858	140067	2	2	0	2	0	2	0	2	2	-1	0	2	0	2	2	2	0	0	0	0	0	0	0	0	0	0	-1	0	0	2	0	2	2	2	2	2	0	0	2	0	2	2	2	0	2	2
AM73	19836859	19847760	10901	2	2	0	2	0	2	0	2	2	-1	0	2	0	2	2	2	0	0	0	0	2	0	0	0	0	0	-1	0	0	2	0	2	2	2	2	2	0	0	2	0	2	2	2	0	2	2
AM74	19847761	19893181	45420	2	2	0	2	0	2	0	2	2	-1	0	2	0	2	2	2	0	0	0	0	2	0	0	0	0	0	-1	0	0	2	0	2	2	2	2	2	0	0	2	0	2	2	2	0	2	2
AM75	19893182	20137558	244376	2	2	0	2	0	2	0	2	2	-1	0	2	0	2	2	2	0	0	0	0	2	0	0	0	0	0	-1	0	0	2	0	2	2	2	2	2	0	0	2	0	2	2	2	0	2	2
AM76	20137559	20154111	16552	2	2	0	2	0	2	0	2	2	-1	0	2	0	2	2	2	0	0	0	0	2	0	0	0	0	0	-1	0	0	2	0	2	2	2	2	2	0	0	2	0	2	2	2	0	2	2
AM77	20154112	20422836	268724	2	2	0	2	0	2	0	2	2	-1	0	2	0	2	2	2	0	0	0	0	2	0	0	0	0	0	-1	0	0	2	0	2	2	2	2	2	0	0	2	0	2	2	2	0	2	2
AM78	20422837	20541203	118366	2	2	0	2	0	2	0	2	2	-1	0	2	0	2	2	2	-1	0	0	0	2	0	0	0	0	0	-1	0	0	2	0	2	2	2	2	2	0	0	2	0	2	2	2	0	2	2
AM79	20541204	20553736	12532	2	2	0	2	0	2	0	2	2	-1	0	2	0	2	2	2	-1	0	0	0	2	0	0	0	0	0	-1	0	0	2	0	2	2	2	2	2	0	0	2	0	2	2	2	0	2	2
AM80	20553737	20604954	51217	2	2	0	2	0	2	0	2	2	-1	0	2	0	2	2	2	-1	0	0	0	2	0	0	0	0	0	2	0	0	2	0	2	2	2	2	2	0	0	2	0	2	2	2	0	2	2
AM81	20604955	20615024	10069	2	2	0	2	0	2	0	2	2	-1	0	2	0	2	2	2	0	0	0	0	2	0	0	0	0	0	2	0	0	2	0	2	2	2	2	2	0	0	2	0	2	2	2	0	2	2
AM82	20615025	20661486	46461	2	2	0	2	0	2	0	2	2	-1	0	2	0	2	2	2	0	0	0	0	2	0	0	0	0	0	2	0	0	2	0	2	2	2	2	2	0	0	2	0	2	2	2	0	2	2
AM83	20661487	20671186	9699	2	2	0	2	0	2	0	2	2	-1	0	2	0	2	2	2	0	0	0	0	2	0	0	0	0	0	2	0	0	2	0	2	2	2	2	2	0	0	2	0	2	2	2	0	2	2
AM84	20671187	20690686	19499	2	2	0	2	0	2	0	2	2	-1	0	2	0	2	2	2	0	0	0	0	2	0	0	0	0	0	2	0	0	2	0	0	2	2	2	2	0	0	2	0	2	2	2	0	2	2
AM85	20690687	20722777	32090	2	2	0	2	0	2	0	2	2	-1	0	2	0	2	2	2	0	0	0	0	2	0	0	0	0	0	2	0	0	2	0	0	2	2	2	2	0	0	2	0	0	2	2	0	2	2
AM86	20722778	20873133	150355	2	2	0	2	0	2	0	2	2	-1	0	2	0	2	2	2	0	0	0	0	2	0	0	0	0	0	2	0	0	2	0	0	2	2	2	2	0	0	2	0	0	2	2	0	2	2
AM87	20873134	20933311	60177	2	2	0	2	0	2	0	2	2	-1	0	2	0	2	2	2	0	2	0	0	2	0	0	0	0	0	2	0	0	2	0	0	2	2	2	2	0	0	2	0	0	2	2	0	2	2
AM88	20933312	20939224	5912	2	2	0	2	0	2	0	2	2	-1	0	2	0	2	2	2	0	2	0	0	2	2	0	0	0	0	2	0	0	2	0	0	2	2	2	2	0	0	2	0	0	2	2	0	2	2
AM89	20939225	20959389	20164	2	2	0	2	0	2	0	2	2	-1	0	2	0	2	2	2	0	2	0	0	2	2	0	0	0	0	2	0	0	2	0	0	2	2	2	2	0	0	2	0	0	2	2	0	0	2
AM90	20959390	20969462	10072	2	2	0	2	0	2	0	2	2	-1	0	2	0	2	2	2	0	2	0	0	2	2	0	0	0	0	2	0	0	2	0	0	2	2	2	2	0	0	2	0	0	2	2	0	0	2
AM91	20969463	21055641	86178	2	2	0	2	0	2	0	2	2	-1	0	2	0	2	2	2	0	2	0	0	2	2	0	0	0	0	2	0	0	2	0	0	2	2	2	2	0	0	2	0	0	2	2	0	0	2
AM92	21055642	21367019	311377	2	2	0	2	0	2	0	2	2	-1	0	2	0	2	2	2	0	2	0	0	2	2	0	0	0	0	2	0	0	2	0	0	2	2	2	2	0	0	2	0	0	2	2	0	0	2
AM93	21367020	21579448	212428	2	2	0	2	0	2	0	2	2	-1	0	2	0	2	2	2	0	2	0	0	2	2	0	0	0	0	2	0	0	2	0	0	2	2	2	2	0	0	2	0	0	2	2	0	0	2
AM95	21579449	21613806	34357	2	2	0	2	0	2	0	2	2	-1	0	2	0	2	2	2	0	2	0	0	2	2	0	0	0	0	2	0	0	2	0	0	2	2	2	2	0	0	2	0	0	2	2	0	0	2
AM94	21613807	22093962	480155	2	2	0	2	0	2	0	2	2	-1	0	2	0	2	2	2	0	2	0	0	2	2	0	0	0	0	2	0	0	2	0	0	2	2	2	2	0	0	2	0	0	2	2	0	0	2
AM96	22093963	22130964	37001	2	2	2	2	0	2	0	2	2	-1	0	2	0	2	2	2	0	2	0	0	2	2	0	0	0	0	2	0	0	2	0	0	2	2	2	2	0	0	2	0	0	2	2	0	0	2
AM97	22130965	22374753	243788	2	2	2	2	0	2	0	2	2	-1	0	2	0	2	2	2	0	2	0	0	2	2	0	0	0	0	2	0	0	2	0	0	2	2	2	2	0	0	2	0	0	2	2	0	0	2
AM98	22374754	22442406	67652	2	2	-1	2	0	2	0	2	2	-1	0	2	0	2	2	2	0	2	0	0	2	2	0	0	0	0	2	0	0	2	0	0	2	2	2	2	0	0	2	0	0	2	2	0	0	2
AM99	22442407	22453415	11008	2	2	-1	2	0	2	0	2	2	-1	0	2	0	2	2	2	0	2	0	0	2	2	0	0	0	0	2	0	0	2	0	0	2	2	2	2	0	0	2	0	0	2	2	0	0	2
AM100	22453416	22482224	28808	2	2	-1	2	0	2	0	2	2	-1	0	2	0	2	2	2	0	2	0	0	2	2	0	0	0	0	2	0	0	2	0	0	2	0	2	2	0	0	2	0	0	2	2	0	0	2
AM101	22482225	22705580	223355	2	2	-1	2	0	2	0	2	2	-1	0	2	0	2	2	2	0	2	0	0	2	2	0	0	0	0	2	0	0	2	0	0	2	0	2	2	0	0	2	0	0	2	2	0	0	2
AM102	22705581	22710667	5086	2	2	-1	2	0	2	0	2	2	-1	0	2	0	2	2	2	-1	2	0	0	2	2	0	0	0	0	2	0	0	2	0	0	2	0	2	2	0	0	2	0	0	2	2	0	0	2
AM105	22710668	22812234	101566	2	2	-1	2	0	2	0	2	2	-1	0	2	0	2	2	2	-1	2	0	0	2	2	0	0	0	0	2	0	0	2	0	0	2	0	2	2	0	0	-1	0	0	2	2	0	0	2
AM104	22812235	22817967	5732	2	2	-1	2	0	2	0	2	2	-1	0	2	0	2	2	2	-1	2	0	0	2	2	0	0	0	0	0	0	0	2	0	0	2	0	2	2	0	0	-1	0	0	2	2	0	0	2
AM103	22817968	23468407	650439	2	2	-1	2	0	2	0	2	2	-1	0	2	0	2	2	2	-1	2	0	0	2	2	0	0	0	0	0	0	0	2	0	0	2	0	2	2	-1	0	-1	0	0	2	2	0	0	2
AM106	23468408	23992463	524055	2	2	-1	2	0	2	0	2	2	-1	0	2	0	2	2	2	-1	2	0	0	2	2	0	0	0	0	2	0	0	2	0	0	2	0	2	2	-1	0	-1	0	0	2	2	0	0	2
AM107	23992464	24262839	270375	2	2	-1	2	0	2	0	2	2	-1	0	2	0	2	2	2	0	2	0	0	2	2	0	0	0	0	2	0	0	2	0	0	2	0	2	2	-1	0	-1	0	0	2	2	0	0	2
AM108	24262840	24278798	15958	2	2	-1	2	0	2	0	2	2	-1	0	2	0	2	2	2	0	2	0	0	2	2	0	0	0	0	2	0	0	2	0	0	2	0	2	2	0	0	-1	0	0	2	2	0	0	2
AM109	24278799	24300545	21746	2	2	-1	2	0	2	0	2	2	-1	0	2	0	2	2	2	0	2	0	0	2	2	0	0	0	0	2	0	0	2	0	0	2	0	2	2	0	0	-1	0	0	2	2	0	0	2
AM110	24300546	24393385	92839	2	2	-1	2	0	2	0	2	2	-1	0	2	0	2	2	2	0	2	0	0	2	2	0	0	0	0	2	0	0	2	0	0	2	0	2	2	0	0	-1	0	0	2	2	0	0	2
AM111	24393386	24448343	54957	2	2	-1	2	0	2	0	2	2	-1	0	2	0	2	2	2	0	2	0	0	2	2	0	0	0	0	2	0	0	2	0	0	2	0	2	2	0	0	-1	0	0	2	2	0	0	2
AM112	24448344	24639233	190889	2	2	-1	2	0	2	0	2	2	-1	0	2	0	2	2	2	0	0	0	0	2	2	0	0	0	0	2	0	0	2	0	0	2	0	2	2	0	0	-1	0	0	2	2	0	0	2
AM113	24639234	24665489	26255	2	2	-1	2	0	2	0	2	2	-1	0	2	0	2	2	2	0	0	0	0	2	2	0	0	0	0	2	0	0	2	0	0	2	0	2	2	0	0	-1	0	0	2	2	0	0	2
AM114	24665490	24810100	144610	2	2	-1	2	0	2	0	2	2	-1	0	2	0	2	2	2	0	0	0	0	2	2	0	0	0	0	2	0	0	2	0	0	2	0	2	2	0	0	-1	0	0	2	2	0	0	2
AM116	24810101	24912357	102256	2	2	-1	2	0	2	0	2	2	-1	0	2	0	2	2	2	0	0	0	0	2	2	0	0	0	0	2	0	0	2	0	0	2	0	2	2	0	0	-1	0	0	2	2	0	0	2
AM115	24912358	25071642	159284	2	2	-1	2	0	2	0	2	2	-1	0	2	0	2	2	2	0	0	0	0	2	2	0	0	0	0	2	0	0	2	0	0	2	0	2	2	0	0	-1	0	0	2	2	0	0	2
AM117	25071643	25176342	104699	2	2	-1	2	0	2	0	2	2	-1	0	2	0	2	2	2	0	0	0	0	2	2	0	0	2	0	2	0	0	2	0	0	2	0	2	2	0	0	-1	0	0	2	2	0	0	2
AM118	25176343	25463997	287654	2	2	-1	2	0	2	0	2	2	-1	0	2	0	2	2	2	0	0	0	0	2	2	0	0	2	0	2	0	0	2	0	0	2	0	2	2	0	0	-1	0	0	2	2	0	0	2
AM119	25463998	25502824	38826	2	2	-1	2	0	2	0	2	2	-1	0	2	0	2	2	2	0	0	0	0	2	2	0	0	2	0	2	0	0	2	0	0	2	0	2	2	0	0	2	0	0	2	2	0	0	2
AM120	25502825	25580381	77556	2	2	-1	2	0	2	0	2	2	-1	0	2	0	2	2	2	0	0	0	0	2	2	0	0	2	0	2	0	0	2	0	0	2	0	2	2	0	0	2	0	0	2	2	0	0	2
AM121	25580382	25674985	94603	2	2	-1	2	0	2	0	2	2	-1	0	2	0	2	2	2	0	0	0	0	2	2	0	0	2	0	2	0	0	2	0	0	2	0	2	2	0	0	2	0	0	2	2	0	0	2
AM124	25674986	25778114	103128	2	2	-1	2	0	2	0	2	2	-1	0	2	0	2	2	2	0	0	0	0	2	2	0	0	2	0	2	0	0	2	0	0	2	0	2	2	0	0	-1	0	0	2	2	0	0	2
AM122	25778115	25832026	53911	2	2	-1	2	0	2	0	2	2	-1	0	2	0	2	2	2	0	0	0	0	2	2	0	0	2	0	2	0	0	2	0	0	2	0	2	2	0	0	-1	0	0	2	2	0	0	2
AM125	25832027	25895196	63169	2	2	-1	2	0	2	0	2	2	-1	0	2	0	2	2	2	0	0	0	0	2	2	0	0	2	0	2	0	0	2	0	0	2	0	2	2	0	0	2	0	0	2	2	0	0	2
AM123	25895197	26212732	317535	2	2	-1	2	0	2	0	2	2	-1	0	2	0	2	2	2	0	0	0	0	2	2	0	0	2	0	2	0	0	2	0	0	2	0	2	2	0	0	-1	0	0	2	2	0	0	2
AM130	26212733	26301848	89115	2	2	-1	2	0	2	0	2	2	-1	0	2	0	2	2	2	0	0	0	0	2	2	0	0	2	0	-1	0	0	2	0	0	2	0	2	0	0	0	-1	0	0	2	2	0	0	2
AM129	26301849	26390553	88704	2	2	-1	2	0	2	0	2	2	-1	0	2	0	2	2	2	0	0	0	0	2	2	0	0	2	0	-1	0	0	2	0	0	2	0	2	0	0	0	-1	0	0	2	2	0	0	2
AM126	26390554	26533019	142465	2	2	-1	2	0	2	0	2	2	-1	0	2	0	2	2	2	0	0	0	0	2	2	0	0	2	0	-1	0	0	2	0	0	2	0	2	0	0	0	-1	0	0	2	2	0	0	2
AM128	26533020	26590229	57209	2	2	-1	2	0	2	0	2	2	-1	0	2	0	2	2	2	0	0	0	0	2	2	0	0	2	0	2	0	0	2	0	0	2	0	2	0	0	0	-1	0	0	2	2	0	0	2
AM131	26590230	26694483	104253	2	2	-1	2	0	2	0	2	2	-1	0	2	0	2	2	2	0	0	0	0	2	2	0	0	2	0	2	0	0	2	0	0	2	0	2	0	0	0	-1	0	0	2	2	0	0	2
AM132	26694484	26769250	74766	2	2	-1	2	0	2	0	2	2	-1	0	2	0	2	2	2	0	0	0	0	2	2	0	0	2	0	-1	0	0	2	0	0	2	0	2	0	0	0	-1	0	0	2	2	0	0	2
AM134	26769251	26787392	18141	2	2	-1	2	0	2	0	2	2	-1	0	2	0	2	2	2	0	0	0	0	2	2	0	0	2	0	-1	0	0	2	0	0	2	0	2	0	0	0	-1	0	0	2	2	0	0	2
AM127	26787393	26856115	68722	2	2	-1	2	0	2	0	2	2	-1	0	2	0	2	2	2	0	0	0	0	2	2	0	0	2	0	-1	0	0	2	0	0	2	0	2	0	0	0	-1	0	0	2	2	0	0	2
AM133	26856116	27628137	772021	2	2	-1	2	0	2	0	2	2	-1	0	2	0	2	2	2	0	0	0	0	2	2	0	0	2	0	-1	0	0	2	0	0	2	0	2	0	0	0	-1	0	0	2	2	0	0	2
AM136	27628138	28231285	603147	2	2	-1	2	0	2	0	2	2	-1	0	2	0	2	2	2	0	0	0	0	2	2	0	0	2	0	2	0	0	2	0	0	2	0	2	0	0	0	-1	0	0	2	2	0	0	2
AM135	28231286	28617647	386361	2	2	-1	2	0	2	0	2	2	-1	0	2	0	2	2	2	0	0	0	0	2	2	0	0	2	0	2	0	0	2	0	0	2	0	2	0	0	0	-1	0	0	2	2	0	0	2
AM137	28617648	28712593	94945	2	2	-1	2	0	2	0	2	2	-1	0	2	0	2	2	2	0	0	0	0	2	2	0	0	2	0	2	0	0	2	0	0	2	0	2	0	0	0	-1	0	0	2	2	0	0	2
AM138	28712594	28930215	217621	2	2	-1	2	0	2	0	2	2	-1	0	2	0	2	2	2	0	0	0	0	2	2	0	0	2	0	-1	0	0	2	0	0	2	0	2	0	0	0	-1	0	0	2	2	0	0	2
AM139	28930216	29160041	229825	2	2	-1	2	0	2	0	2	2	-1	0	2	0	2	2	2	0	0	0	0	2	2	0	0	2	0	-1	0	0	2	0	0	2	0	2	0	0	0	-1	0	0	2	2	0	0	2
AM140	29160042	29264550	104508	2	2	-1	2	0	2	0	2	2	-1	0	2	0	2	2	2	0	0	0	0	2	2	0	0	2	0	-1	0	0	2	0	0	2	0	2	0	0	0	2	0	0	2	2	0	0	2
AM141	29264551	29273098	8547	2	2	-1	2	0	2	0	2	2	-1	0	2	0	2	2	2	0	0	0	0	2	2	0	0	2	0	-1	0	0	2	0	0	2	0	2	0	0	0	-1	0	0	2	2	0	0	2
AM142	29273099	29887244	614145	2	2	-1	2	0	2	0	2	2	-1	0	2	0	2	2	2	0	0	0	0	2	2	0	0	2	0	-1	0	0	2	0	0	2	0	0	0	0	0	-1	0	0	2	2	0	0	2
AM143	29887245	29982064	94819	2	2	-1	2	0	2	0	2	2	-1	0	2	0	2	2	2	0	0	0	0	2	2	0	0	2	0	2	0	0	2	0	0	2	0	0	0	0	0	-1	0	0	2	2	0	0	2
AM144	29982065	30412446	430381	2	2	-1	2	0	2	0	2	2	-1	0	2	0	2	2	2	0	0	0	0	2	2	0	0	2	0	2	0	0	2	0	0	2	0	0	0	0	0	-1	0	0	2	2	0	0	2
AM145	30412447	30441888	29441	2	2	-1	2	0	2	0	2	2	-1	0	2	0	2	2	2	0	0	0	0	2	2	0	0	2	0	2	0	0	2	0	0	2	0	0	0	0	0	-1	0	0	2	2	0	0	2
AM146	30441889	31014776	572887	2	2	-1	2	0	2	0	2	2	-1	0	2	0	2	2	2	0	0	0	0	2	2	0	0	2	0	2	0	0	2	0	0	0	0	0	0	0	0	-1	0	0	2	2	0	0	2
AM147	31014777	31033661	18884	2	2	-1	2	0	2	0	2	2	-1	0	2	0	2	2	2	0	0	0	0	2	2	0	0	2	0	2	0	0	2	0	0	0	0	0	0	0	0	-1	0	0	2	2	0	0	2
AM151	31033662	31087315	53653	2	2	-1	2	0	2	0	2	2	-1	0	2	0	2	2	2	0	0	0	0	2	2	0	0	2	0	2	0	0	2	0	0	0	0	0	0	0	0	-1	0	0	2	2	0	0	2
AM150	31087316	31192344	105028	2	2	-1	2	0	2	0	2	2	-1	0	2	0	2	2	2	0	0	0	0	2	2	0	0	2	0	2	0	0	2	0	0	0	0	0	0	0	0	2	0	0	2	2	0	0	2
AM152	31192345	31273850	81505	2	2	-1	2	0	2	0	2	2	-1	0	2	0	2	2	2	0	0	0	0	2	2	0	0	2	0	2	0	0	2	0	0	0	0	0	0	0	0	2	0	0	2	2	0	0	2
AM153	31273851	31301034	27183	2	2	-1	2	0	2	0	2	2	-1	0	2	0	2	2	2	0	0	0	0	2	2	0	0	2	0	2	0	0	2	0	0	0	0	0	0	0	0	-1	0	0	2	2	0	0	2
AM148	31301035	31468009	166974	2	2	-1	2	0	2	0	2	2	-1	0	2	0	2	2	2	0	0	0	0	2	2	0	0	2	0	2	0	0	2	0	0	0	0	0	0	0	0	-1	0	0	2	2	0	0	2
AM149	31468010	31475382	7372	2	2	-1	2	0	2	0	2	2	-1	0	2	0	2	2	2	0	0	0	0	2	2	0	0	2	0	2	0	0	2	0	0	0	0	0	0	0	0	-1	0	0	2	2	0	0	2
AM154	31475383	31520583	45200	2	2	-1	2	0	2	0	2	2	-1	0	2	0	2	2	2	0	0	0	0	2	2	0	0	2	0	2	0	0	2	0	0	0	0	0	0	0	0	2	0	0	2	2	0	0	2
AM155	31520584	31618097	97513	2	2	-1	2	0	2	0	2	2	-1	0	2	0	2	2	2	0	0	0	0	2	2	0	0	2	0	2	0	0	2	0	0	0	0	0	0	0	0	-1	0	0	2	2	0	0	2
AM156	31618098	31644958	26860	2	2	-1	2	0	2	0	2	2	-1	0	2	0	2	2	2	0	0	0	0	2	2	0	0	2	0	2	0	0	2	0	0	0	0	0	0	0	0	-1	0	0	2	2	0	0	2
AM157	31644959	32253144	608185	2	2	-1	2	0	2	0	2	2	-1	0	2	0	2	2	2	0	0	0	0	2	2	0	0	2	0	2	0	0	2	0	0	0	0	0	0	0	0	-1	0	0	2	2	0	0	2
AM158	32253145	32380918	127773	2	2	-1	2	0	2	0	2	2	-1	0	2	0	2	2	2	0	0	0	0	2	2	0	0	2	0	2	0	0	2	0	0	0	0	0	0	0	0	-1	0	0	2	2	0	0	2
AM159	32380919	32499836	118917	2	2	-1	2	0	2	0	2	2	-1	0	2	0	2	2	2	0	0	0	0	2	2	0	0	2	0	2	0	0	2	0	0	0	0	0	0	0	0	2	0	0	2	2	0	0	2
AM160	32499837	32512183	12346	2	2	-1	2	0	2	0	2	2	-1	0	2	0	2	2	2	0	0	0	0	2	2	0	0	2	0	2	0	0	2	0	0	0	0	0	0	0	0	2	0	0	2	2	0	0	2
AM161	32512184	32546589	34405	2	2	-1	2	0	2	0	2	2	-1	0	2	0	2	2	2	0	0	0	0	2	2	0	0	2	0	2	0	0	2	0	0	0	0	0	0	0	0	-1	0	0	2	2	0	0	2
AM162	32546590	32700901	154311	2	2	-1	2	0	2	0	2	2	-1	0	2	0	2	2	2	0	0	0	0	2	2	0	0	2	0	2	0	0	2	0	0	0	0	0	0	0	0	-1	0	0	2	2	0	0	2
AM163	32700902	32707375	6473	2	2	-1	2	0	2	0	2	2	-1	0	2	0	2	2	2	0	0	0	0	2	2	0	0	2	0	2	0	0	2	0	0	0	0	0	0	0	0	-1	0	0	2	2	0	0	2
AM164	32707376	32720080	12704	2	2	-1	2	0	2	0	2	2	-1	0	2	0	2	2	2	0	0	0	0	2	2	0	0	2	0	2	0	0	2	0	0	0	0	0	0	0	0	-1	0	0	2	2	0	2	2
AM165	32720081	32773702	53621	2	2	-1	2	0	2	0	2	2	-1	0	2	0	2	2	2	0	0	0	0	2	2	0	0	2	0	-1	0	0	2	0	0	0	0	0	0	0	0	-1	0	0	2	2	0	2	2
AM166	32773703	33016328	242625	2	2	-1	2	0	2	0	2	2	-1	0	2	0	2	2	2	0	0	0	0	2	2	0	0	2	0	-1	0	0	2	0	0	0	0	0	0	0	0	-1	0	0	2	2	0	2	2
AM167	33016329	33267880	251551	2	2	-1	2	0	2	0	2	2	-1	0	2	0	2	2	2	0	0	0	0	2	2	0	0	2	0	0	0	0	2	0	0	0	0	0	0	0	0	-1	0	0	2	2	0	2	2
AM168	33267881	33439644	171763	2	2	-1	2	0	2	0	2	2	-1	0	2	0	2	2	2	0	0	0	0	2	2	0	0	2	0	-1	0	0	2	0	0	0	0	0	0	0	0	-1	0	0	2	2	0	2	2
AM169	33439645	34792001	1352356	2	2	-1	2	0	2	0	2	2	-1	0	2	0	2	2	2	0	0	0	0	2	2	0	0	2	0	-1	0	0	2	0	0	0	0	0	0	0	0	2	0	0	2	2	0	2	2
AM171	34792002	34954529	162527	2	2	-1	2	0	2	0	2	2	-1	0	2	0	2	2	2	0	0	0	0	2	2	0	0	2	0	-1	0	0	2	0	0	0	0	0	0	0	0	-1	0	0	2	2	0	2	2
AM170	34954530	35336334	381804	2	2	-1	2	0	2	0	2	2	-1	0	2	0	2	2	2	0	0	0	0	2	2	0	0	2	0	-1	0	0	2	0	0	0	0	0	0	0	0	-1	0	0	2	2	0	2	2
AM172	35336335	35769127	432792	2	2	-1	2	0	2	0	2	2	-1	0	2	0	2	2	2	0	0	0	0	2	2	0	0	2	0	-1	0	0	2	0	0	0	0	0	0	0	0	-1	0	0	2	2	0	2	2
AM173	35769128	36382435	613307	2	2	-1	2	0	2	0	2	2	-1	0	2	0	2	2	2	0	0	0	0	2	2	0	0	2	0	-1	0	0	2	0	0	0	0	0	0	0	0	-1	0	0	2	2	0	2	2
AM174	36382436	36996069	613633	2	2	-1	2	0	2	0	2	2	-1	0	2	0	2	2	2	0	0	0	0	2	2	0	0	2	0	-1	0	0	2	0	0	0	0	0	0	0	0	-1	0	0	2	2	0	2	2
AM175	36996070	37054129	58059	2	2	-1	2	0	2	0	2	2	-1	0	2	0	2	2	2	0	0	0	0	2	2	0	0	2	0	-1	0	0	2	0	0	0	0	0	0	0	0	-1	0	0	2	2	0	2	2
AM176	37054130	37292664	238534	2	2	-1	2	0	2	0	2	2	-1	0	2	0	2	2	2	0	0	0	0	2	2	0	0	2	0	-1	0	0	2	0	0	0	0	0	0	0	0	-1	0	0	2	2	0	2	2
AM177	37292665	37377501	84836	2	2	-1	2	0	2	0	2	2	-1	0	2	0	2	2	2	0	2	0	0	2	2	0	0	2	0	-1	0	0	2	0	0	0	0	0	0	0	0	-1	0	0	2	2	0	2	2
AM178	37377502	37554158	176656	2	2	-1	2	0	2	0	2	2	-1	0	2	0	2	2	2	0	2	0	0	2	2	0	0	2	0	-1	0	0	2	0	0	0	0	0	0	0	0	-1	0	0	2	2	0	2	2
AM179	37554159	37571580	17421	2	2	-1	2	0	2	0	2	2	-1	0	2	0	2	2	2	0	2	0	0	2	2	0	0	2	0	-1	0	0	2	0	0	0	0	0	0	0	0	-1	0	0	2	2	0	2	2
AM180	37571581	40199684	2628103	2	2	-1	2	0	2	0	2	2	-1	0	2	0	2	2	2	0	2	0	0	2	2	0	0	2	0	-1	0	0	2	0	0	0	0	0	0	0	0	-1	0	0	2	2	0	2	2
AM181	40199685	40297960	98275	2	2	-1	2	0	2	0	2	2	-1	0	2	0	2	2	2	0	2	0	0	2	2	0	0	2	0	-1	0	0	2	0	0	0	0	0	0	2	0	-1	0	0	2	2	0	2	2
AM182	40297961	41649479	1351518	2	2	-1	2	0	2	0	2	2	-1	0	2	0	2	2	2	0	2	0	0	2	2	0	0	2	0	-1	0	0	2	0	0	0	0	0	0	2	0	-1	0	0	2	2	0	2	2
AM183	41649480	42696190	1046710	2	2	-1	2	0	2	0	2	2	-1	0	2	0	2	2	2	0	2	0	0	2	2	0	0	2	0	-1	0	0	2	0	0	0	0	0	0	2	0	-1	0	0	2	2	0	2	2
AM184	42696191	42853994	157803	2	2	-1	2	0	2	0	2	2	-1	0	2	0	2	2	2	0	2	0	0	2	2	0	0	2	0	2	0	0	2	0	0	0	0	0	0	2	0	-1	0	0	2	2	0	2	2
AM188	42853995	43027432	173437	2	2	-1	2	0	2	0	2	2	-1	0	2	0	2	2	2	0	2	0	0	2	2	0	0	2	0	2	0	0	2	0	0	0	0	0	0	2	0	-1	0	0	2	2	0	2	2
AM187	43027433	43056796	29363	2	2	-1	2	0	2	0	2	2	-1	0	2	0	2	2	2	0	2	0	0	2	2	0	0	2	0	2	0	0	2	0	0	0	0	0	0	2	0	2	0	0	2	2	0	2	2
AM186	43056797	43069354	12557	2	2	-1	2	0	2	0	2	2	-1	0	2	0	2	2	2	0	2	0	0	2	2	0	0	2	0	2	0	0	2	0	0	0	0	0	0	2	0	2	0	0	2	2	0	2	2
AM185	43069355	43882823	813468	2	2	-1	2	0	2	0	2	2	-1	0	2	0	2	2	2	0	2	0	0	2	2	0	0	2	0	2	0	0	2	0	0	0	0	0	0	2	0	-1	0	0	2	2	0	2	2
AM189	43882824	44007016	124192	2	2	-1	2	0	2	0	2	2	-1	0	2	0	2	2	2	0	2	0	0	2	2	0	0	2	0	2	0	0	2	0	0	0	0	0	0	2	0	-1	0	0	2	2	0	2	2
AM190	44007017	44502275	495258	2	2	-1	2	0	2	0	2	2	-1	0	2	0	2	2	2	0	2	0	0	2	2	0	0	2	0	2	0	0	2	0	0	0	0	0	0	2	0	-1	0	0	2	2	0	2	2
AM191	44502276	44725631	223355	2	2	-1	2	0	2	0	2	2	-1	0	2	0	2	2	2	-1	2	0	0	2	2	0	0	2	0	2	0	0	2	0	0	0	0	0	0	2	0	-1	0	0	2	2	0	2	2
AM192	44725632	44799644	74012	2	2	-1	2	0	2	0	2	2	-1	0	2	0	2	2	2	-1	2	0	0	2	2	0	0	2	0	2	0	0	2	0	0	0	0	0	0	2	0	2	0	0	2	2	0	2	2
AM193	44799645	44964557	164912	2	2	-1	2	0	2	0	2	2	-1	0	2	0	2	2	2	2	2	0	0	2	2	0	0	2	0	2	0	0	2	0	0	0	0	0	0	2	0	2	0	0	2	2	0	2	2
AM194	44964558	45297552	332994	2	2	-1	2	0	2	0	2	2	-1	0	2	0	2	2	2	2	2	0	0	2	2	0	0	2	0	2	0	0	2	0	0	0	0	0	0	2	0	-1	0	0	2	2	0	2	2
AM195	45297553	45307938	10385	2	2	-1	2	0	2	0	2	2	-1	0	2	0	2	2	2	2	2	0	0	2	2	0	0	2	0	2	0	0	2	0	0	0	0	0	0	2	0	-1	0	0	2	2	0	2	2
AM196	45307939	45474515	166576	2	2	-1	2	0	2	0	2	2	-1	0	2	0	2	2	2	2	2	0	0	2	2	0	0	2	0	2	0	0	2	0	0	0	0	0	0	2	0	-1	0	0	2	2	0	2	2
AM197	45474516	45720065	245549	2	2	-1	2	0	2	0	2	2	-1	0	2	0	2	2	2	2	2	0	0	2	2	0	0	2	0	2	0	0	2	0	0	0	0	0	0	2	0	2	0	0	2	2	0	2	2
AM198	45720066	46025567	305501	2	2	-1	2	0	2	0	2	2	-1	0	2	0	2	2	2	2	2	0	0	2	2	0	0	2	0	2	0	0	2	0	0	0	0	0	0	2	0	-1	0	0	2	2	0	2	2
AM199	46025568	46262968	237400	2	2	-1	2	0	2	0	2	2	-1	0	2	0	2	2	2	-1	2	0	0	2	2	0	0	2	0	2	0	0	2	0	0	0	0	0	0	2	0	-1	0	0	2	2	0	2	2
AM200	46262969	46499035	236066	2	2	-1	2	0	2	0	2	2	-1	0	2	0	2	2	2	0	2	0	0	2	2	0	0	2	0	2	0	0	2	0	0	0	0	0	0	2	0	-1	0	0	2	2	0	2	2
AM201	46499036	46507149	8113	2	2	-1	2	0	2	0	2	2	-1	0	2	0	2	2	2	-1	2	0	0	2	2	0	0	2	0	2	0	0	2	0	0	0	0	0	0	2	0	-1	0	0	2	2	0	2	2
AM202	46507150	46606228	99078	2	2	-1	2	0	2	0	2	2	-1	0	2	0	2	2	2	-1	2	0	0	2	2	0	0	2	0	2	0	0	2	0	0	0	0	0	0	2	0	2	0	0	2	2	0	2	2
AM203	46606229	46643761	37532	2	2	-1	2	0	2	0	2	2	-1	0	2	0	2	2	2	-1	2	0	0	2	2	0	0	2	0	2	0	0	2	0	0	0	0	0	0	2	0	-1	0	0	2	2	0	2	2
AM205	46643762	46708708	64946	2	2	-1	2	0	2	0	2	2	-1	0	2	0	2	2	2	-1	2	0	0	2	2	0	0	2	0	2	0	0	2	0	0	0	0	0	0	2	0	-1	0	0	2	2	0	2	2
AM207	46708709	46821180	112471	2	2	-1	2	0	2	0	2	2	-1	0	2	0	2	2	2	-1	2	0	0	2	2	0	0	2	0	2	0	0	2	0	0	0	0	0	0	2	0	-1	0	0	2	2	0	2	2
AM206	46821181	46967045	145864	2	2	-1	2	0	2	0	2	2	-1	0	2	0	2	2	2	2	2	0	0	2	2	0	0	2	0	2	0	0	2	0	0	0	0	0	0	2	0	-1	0	0	2	2	0	2	2
AM208	46967046	47056406	89360	2	2	-1	2	0	2	0	2	2	-1	0	2	0	2	2	2	-1	2	0	0	2	2	0	0	2	0	2	0	0	2	0	0	0	0	0	0	2	0	-1	0	0	2	2	0	2	2
AM210	47056407	47362003	305596	2	2	-1	2	0	2	0	2	2	-1	0	2	0	2	2	2	2	2	0	0	2	2	0	0	2	0	2	0	0	2	0	0	0	0	0	0	2	0	-1	0	0	2	2	0	2	2
AM212	47362004	47400243	38239	2	2	-1	2	0	2	0	2	2	-1	0	2	0	2	2	2	2	2	0	0	2	2	0	0	2	0	2	0	0	2	0	0	0	0	0	0	2	0	-1	0	0	2	2	0	2	2
AM214	47400244	47656610	256366	2	2	-1	2	0	2	0	2	2	-1	0	2	0	2	2	2	2	2	0	0	2	2	0	0	2	0	2	0	0	2	0	0	0	0	0	0	2	0	-1	0	0	2	2	0	2	2
AM209	47656611	47804478	147867	2	2	-1	2	0	2	0	2	2	-1	0	2	0	2	2	2	2	2	0	0	2	2	0	0	2	0	2	0	0	2	0	0	0	0	0	0	2	0	-1	0	0	2	2	0	2	2
AM211	47804479	47918091	113612	2	2	-1	2	0	2	0	2	2	-1	0	2	0	2	2	2	2	2	0	0	2	2	0	0	2	0	2	0	0	2	0	0	0	0	0	0	2	0	-1	0	0	2	2	0	2	2
AM213	47918092	48094625	176533	2	2	-1	2	0	2	0	2	2	-1	0	2	0	2	2	2	2	2	0	0	2	2	0	0	2	0	2	0	0	2	0	0	0	0	0	0	2	0	-1	0	0	2	2	0	2	2
AM215	48094626	48441916	347290	2	2	-1	2	0	2	0	2	2	-1	0	2	0	2	2	2	2	2	0	0	2	2	0	0	2	0	2	0	0	2	0	0	0	0	0	0	2	0	-1	0	0	2	2	0	2	2
AM204	48441917	49268469	826552	2	2	-1	2	0	2	0	2	2	-1	0	2	0	2	2	2	2	2	0	0	2	2	0	0	2	0	2	0	0	2	0	0	0	0	0	0	2	0	-1	0	0	2	2	0	2	2
AM216	49268470	49371499	103029	2	2	-1	2	0	2	0	2	2	-1	0	2	0	2	2	2	2	2	0	0	2	2	0	0	2	0	2	0	0	2	0	0	0	0	0	0	2	0	2	0	0	2	2	0	2	2
AM220	49371500	49403337	31837	2	2	-1	2	0	2	0	2	2	-1	0	2	0	2	2	2	2	2	0	0	2	2	0	0	2	0	2	0	0	2	0	0	0	0	0	0	2	0	2	0	0	2	2	0	2	2
AM217	49403338	49760574	357236	2	2	-1	2	0	2	0	2	2	-1	0	2	0	2	2	2	2	2	0	0	2	2	0	0	2	0	2	0	0	2	0	0	0	0	0	0	2	0	-1	0	0	2	2	0	2	2
AM221	49760575	49777000	16425	2	2	-1	2	0	2	0	2	2	-1	0	2	0	2	2	2	2	2	0	0	2	2	0	0	2	0	2	0	0	2	0	0	0	0	0	0	2	0	-1	0	0	2	2	0	2	2
AM218	49777001	50056628	279627	2	2	-1	2	0	2	0	2	2	-1	0	2	0	2	2	2	2	2	0	0	2	2	0	0	2	0	2	0	0	2	0	0	0	0	0	0	2	0	2	0	0	2	2	0	2	2
AM222	50056629	50086370	29741	2	2	-1	2	0	2	0	2	2	-1	0	2	0	2	2	2	2	2	0	0	2	2	0	0	2	0	2	0	0	2	0	0	0	0	0	0	2	0	2	0	0	2	2	0	2	2
AM224	50086371	50701805	615434	2	2	-1	2	0	2	0	2	2	-1	0	2	0	2	2	2	2	2	0	0	2	2	0	0	2	0	2	0	0	2	0	0	0	0	0	0	2	0	-1	0	0	2	2	0	2	2
AM226	50701806	50859038	157232	2	2	-1	2	0	2	0	2	2	-1	0	2	0	2	2	2	2	2	0	0	2	2	0	0	2	0	2	0	0	2	0	0	0	0	0	0	2	0	-1	0	0	2	2	0	2	2
AM228	50859039	51682771	823732	2	2	-1	2	0	2	0	2	2	-1	0	2	0	2	2	2	2	2	0	0	2	2	0	0	2	0	2	0	0	2	0	0	0	0	0	0	2	0	-1	0	0	2	2	0	2	2
AM219	51682772	52117669	434897	2	2	-1	2	0	2	0	2	2	-1	0	2	0	2	2	2	2	2	0	0	2	2	0	0	2	0	2	0	0	2	0	0	0	0	0	0	2	0	-1	0	0	2	2	0	2	2
AM223	52117670	52635931	518261	2	2	-1	2	0	2	0	2	2	-1	0	2	0	2	2	2	2	2	0	0	2	2	0	0	2	0	2	0	0	2	0	0	0	0	0	0	2	0	-1	0	0	2	2	0	2	2
AM225	52635932	52663663	27731	2	2	-1	2	0	2	0	2	2	-1	0	2	0	2	2	2	2	2	0	0	2	2	0	0	2	0	2	0	0	2	0	0	0	0	0	0	2	0	-1	0	0	2	2	0	2	2
AM227	52663664	52934041	270377	2	2	-1	2	0	2	0	2	2	-1	0	2	0	2	2	2	2	2	0	0	2	2	0	0	2	0	2	0	0	2	0	0	0	0	0	0	2	0	-1	0	0	2	2	0	2	2
AM229	52934042	53021536	87494	2	2	-1	2	0	2	0	2	2	-1	0	2	0	2	2	2	2	2	0	0	2	2	0	0	2	0	2	0	0	2	0	0	0	0	0	0	2	0	-1	0	0	2	2	0	2	2
AM231	53021537	53422371	400834	2	2	-1	2	0	2	0	2	2	-1	0	2	0	2	2	2	2	2	0	0	2	2	0	0	2	0	2	0	0	2	0	0	0	0	0	0	2	0	-1	0	0	2	2	0	2	2
AM233	53422372	53522214	99842	2	2	-1	2	0	2	0	2	2	-1	0	2	0	2	2	2	2	2	0	0	2	2	0	0	2	0	2	0	0	2	0	0	0	0	0	0	2	0	-1	0	0	2	2	0	2	2
AM230	53522215	54191442	669227	2	2	-1	2	0	2	0	2	2	-1	0	2	0	2	2	2	2	2	0	0	2	2	0	0	2	0	2	0	0	2	0	0	0	0	0	0	2	0	-1	0	0	2	2	0	2	2
AM232	54191443	54355802	164359	2	2	-1	2	0	2	0	2	2	-1	0	2	0	2	2	2	2	2	0	0	2	2	0	0	2	0	2	0	0	2	0	0	0	0	0	0	2	0	-1	0	0	2	2	0	2	2
AM234	54355803	54438368	82565	2	2	-1	2	0	2	0	2	2	-1	0	2	0	2	2	2	2	2	0	0	2	2	0	0	2	0	2	0	0	2	0	0	0	0	0	0	2	0	-1	0	0	2	2	0	2	2
AM236	54438369	54735023	296654	2	2	-1	2	0	2	0	2	2	-1	0	2	0	2	2	2	2	2	0	0	2	2	0	0	2	0	2	0	0	2	0	0	0	0	0	0	2	0	2	0	0	2	2	0	2	2
AM235	54735024	54958961	223937	2	2	-1	2	0	2	0	2	2	-1	0	2	0	2	2	2	2	2	0	0	2	2	0	0	2	0	2	0	0	2	0	0	0	0	0	0	2	0	-1	0	0	2	2	0	2	2
AM237	54958962	55233317	274355	2	2	-1	2	0	2	0	2	2	-1	0	2	0	2	2	2	2	2	0	0	2	2	0	0	2	0	2	0	0	2	0	0	0	0	0	0	2	0	2	0	0	2	2	0	2	2
AM239	55233318	55390002	156684	2	2	-1	2	0	2	0	2	2	-1	0	2	0	2	2	2	2	2	0	0	2	2	0	0	2	0	2	0	0	2	0	0	0	0	0	0	2	0	2	0	0	2	2	0	2	2
AM238	55390003	55413168	23165	2	2	-1	2	0	2	0	2	2	-1	0	2	0	2	2	2	2	2	0	0	2	2	0	0	2	0	2	0	0	2	0	0	0	0	0	0	2	0	2	0	0	2	2	0	2	2
AM241	55413169	55468838	55669	2	2	-1	2	0	2	0	2	2	-1	0	2	0	2	2	2	2	2	0	0	2	2	0	0	2	0	2	0	0	2	0	0	0	0	0	0	2	0	2	0	0	2	2	0	2	2
AM240	55468839	55993051	524212	2	2	-1	2	0	2	0	2	2	-1	0	2	0	2	2	2	2	2	0	0	2	2	0	0	2	0	2	0	0	2	0	0	0	0	0	0	2	0	-1	0	0	2	2	0	2	2
AM242	55993052	56233043	239991	2	2	-1	2	0	2	0	2	2	-1	0	2	0	2	2	2	2	2	0	0	2	2	0	0	2	0	2	0	0	2	0	0	0	0	0	0	2	0	2	0	0	2	2	0	2	2
AM247	56233044	56272741	39697	2	2	-1	2	0	2	0	2	2	-1	0	2	0	2	2	2	2	2	0	0	2	2	0	0	2	0	0	0	0	2	0	0	0	0	0	0	2	0	2	0	0	2	2	0	2	2
AM244	56272742	56340244	67502	2	2	-1	2	0	2	0	2	2	-1	0	2	0	2	2	2	2	2	0	0	2	2	0	0	2	0	0	0	0	2	0	0	0	0	0	0	2	0	2	0	0	2	2	0	2	2
AM246	56340245	56452480	112235	2	2	-1	2	0	2	0	2	2	-1	0	2	0	2	2	2	2	2	0	0	2	2	0	0	2	0	0	0	0	2	0	0	0	0	0	0	2	0	2	0	0	2	2	0	2	2
AM243	56452481	56474880	22399	2	2	-1	2	0	2	0	2	2	-1	0	2	0	2	2	2	2	2	0	0	2	2	0	0	2	0	0	0	0	2	0	0	0	0	0	0	2	0	2	0	0	2	2	0	2	2
AM245	56474881	56539438	64557	2	2	-1	2	0	2	0	2	2	-1	0	2	0	2	2	2	2	2	0	0	2	2	0	0	2	0	-1	0	0	2	0	0	0	0	0	0	2	0	-1	0	0	2	2	0	2	2
AM248	56539439	57501029	961590	2	2	-1	2	0	2	0	2	2	-1	0	2	0	2	2	2	2	2	0	0	2	2	0	0	2	0	-1	0	0	2	0	0	0	0	0	0	2	0	-1	0	0	2	2	0	2	2
AM249	57501030	57729949	228919	0	2	-1	2	0	2	0	2	2	-1	0	2	0	2	2	2	2	2	0	0	2	2	0	0	2	0	-1	0	0	2	0	0	0	0	0	0	2	0	-1	0	0	2	2	0	2	2
AM250	57729950	57744783	14833	0	2	-1	2	0	2	0	2	2	-1	0	2	0	2	2	2	2	2	0	0	2	2	0	0	2	0	-1	0	0	2	0	0	0	0	0	0	2	0	-1	0	0	2	2	0	2	2
AM251	57744784	57989647	244863	0	2	-1	2	0	2	0	2	2	-1	0	2	0	2	2	2	2	2	0	0	2	2	0	0	-1	0	-1	0	0	2	0	0	0	0	0	0	2	0	-1	0	0	2	2	0	2	2
AM252	57989648	58116926	127278	0	2	-1	2	0	2	0	2	2	-1	0	2	0	2	2	2	2	2	0	0	2	2	0	0	-1	0	-1	0	0	2	0	0	0	0	0	0	2	0	2	0	0	2	2	0	2	2
AM253	58116927	58135095	18168	0	2	-1	2	0	2	0	2	2	-1	0	2	0	2	2	2	2	2	0	0	2	2	0	0	-1	0	-1	0	0	2	0	0	0	0	0	0	2	0	-1	0	0	2	2	0	2	2
AM254	58135096	58212410	77314	0	2	-1	2	0	2	0	2	2	-1	0	2	0	2	2	2	2	2	0	0	2	2	0	0	-1	0	2	0	0	2	0	0	0	0	0	0	2	0	-1	0	0	2	2	0	2	2
AM255	58212411	59334882	1122471	0	2	-1	2	0	2	0	2	2	-1	0	2	0	2	2	2	2	2	0	0	2	2	0	0	-1	0	-1	0	0	2	0	0	0	0	0	0	2	0	-1	0	0	2	2	0	2	2
AM256	59334883	60272290	937407	0	2	-1	2	0	2	0	2	2	-1	0	2	0	2	2	2	2	2	0	0	2	2	0	0	-1	0	-1	0	0	2	0	0	0	0	0	0	2	0	-1	0	0	2	2	0	2	2
AM257	60272291	61105478	833187	0	2	-1	2	0	2	0	2	0	-1	0	2	0	2	2	2	2	2	0	0	2	2	0	0	-1	0	-1	0	0	2	0	0	0	0	0	0	2	0	-1	0	0	2	2	0	2	2
AM259	61105479	61224341	118862	0	2	-1	2	0	2	0	2	0	-1	0	2	0	2	2	2	2	2	0	0	2	2	0	0	-1	0	-1	0	0	2	0	0	0	0	0	0	2	0	2	0	0	2	2	0	2	2
AM258	61224342	68881818	7657476	0	2	-1	2	0	2	0	2	0	-1	0	2	0	2	2	2	2	2	0	0	2	2	0	0	-1	0	-1	0	0	2	0	0	0	0	0	0	2	0	-1	0	0	2	2	0	2	2
AM260	68881819	69550720	668901	0	2	-1	2	0	2	0	2	0	-1	0	2	0	2	2	2	2	2	0	0	2	2	0	0	-1	0	-1	0	0	2	0	0	0	0	0	0	2	0	2	0	0	2	2	0	2	2
AM261	69550721	70497733	947012	0	2	-1	2	0	2	0	2	0	-1	0	2	0	2	2	2	2	2	0	0	2	2	0	0	-1	0	-1	0	0	2	0	0	0	0	0	0	2	0	-1	0	0	2	2	0	2	2
AM263	70497734	70655024	157290	0	2	-1	2	0	2	0	2	0	-1	0	2	0	2	2	2	2	2	0	0	2	2	0	0	-1	0	-1	0	0	2	0	0	0	0	0	0	2	0	-1	0	0	2	2	0	2	2
AM264	70655025	70922379	267354	0	2	-1	2	0	2	0	2	0	-1	0	2	0	2	2	2	2	2	0	0	2	2	0	0	-1	0	-1	0	0	2	0	0	0	0	0	0	2	0	-1	0	0	2	2	0	2	2
AM265	70922380	71267753	345373	0	2	-1	2	0	2	0	2	0	-1	0	2	0	2	2	2	2	2	0	0	2	2	0	0	-1	0	2	0	0	2	0	0	0	0	0	0	2	0	-1	0	0	2	2	0	2	2
AM267	71267754	71362167	94413	0	2	-1	2	0	2	0	2	0	-1	0	2	0	2	2	2	2	2	0	0	2	2	0	0	-1	0	-1	0	0	2	0	0	0	0	0	0	2	0	-1	0	0	2	2	0	2	2
AM262	71362168	71469968	107800	0	2	-1	2	0	2	0	2	0	-1	0	2	0	2	2	2	2	2	0	0	2	2	0	0	-1	0	-1	0	0	2	0	0	0	0	0	0	2	0	-1	0	0	2	2	0	2	2
AM266	71469969	71768261	298292	0	2	-1	2	0	2	0	2	0	-1	0	2	0	2	2	2	2	2	0	0	2	2	0	0	-1	0	-1	0	0	2	0	0	0	0	0	0	2	0	-1	0	0	2	2	0	2	2
AM268	71768262	71878738	110476	0	2	-1	2	0	2	0	2	0	-1	0	2	0	2	2	2	2	2	0	0	2	2	0	2	-1	0	-1	0	0	2	0	0	0	0	0	0	2	0	-1	0	0	2	2	0	2	2
AM269	71878739	72016766	138027	0	2	-1	2	0	2	0	2	0	-1	0	2	0	2	2	2	2	2	0	0	2	2	0	2	-1	0	2	0	0	2	0	0	0	0	0	0	2	0	-1	0	0	2	2	0	2	2
AM270	72016767	72766793	750026	0	2	-1	2	0	2	0	2	0	-1	0	2	0	2	2	2	2	2	0	0	2	2	0	2	-1	0	-1	0	0	2	0	0	0	0	0	0	2	0	-1	0	0	2	2	0	2	2
AM271	72766794	72818524	51730	0	2	-1	2	0	2	0	2	0	-1	0	2	0	2	2	2	2	2	0	0	2	2	0	2	-1	0	-1	0	0	2	0	0	0	0	0	0	2	0	-1	0	0	2	2	0	2	2
AM272	72818525	72959874	141349	0	2	-1	2	0	2	0	2	0	-1	0	2	0	2	2	2	2	2	0	0	2	2	0	2	-1	0	-1	0	0	2	0	0	0	0	0	0	2	0	-1	0	0	2	2	0	2	2
AM273	72959875	75217341	2257466	0	2	-1	2	0	2	0	2	0	-1	0	2	0	2	2	2	2	2	0	0	2	2	0	2	-1	0	-1	0	0	2	0	0	0	0	0	0	2	0	-1	0	0	2	2	0	2	2
AM277	75217342	75532019	314677	0	2	-1	2	0	2	0	2	0	-1	0	2	0	2	2	2	2	2	0	0	2	2	0	2	-1	0	2	0	0	2	0	0	0	0	0	0	2	0	-1	0	0	2	2	0	2	2
AM274	75532020	75658903	126883	0	2	-1	2	0	2	0	2	0	-1	0	2	0	2	2	2	2	2	0	0	2	2	0	2	-1	0	2	0	0	2	0	0	0	0	0	0	2	0	-1	0	0	2	2	0	2	2
AM276	75658904	75823914	165010	0	2	-1	2	0	2	0	2	0	-1	0	2	0	2	2	2	2	2	0	0	2	2	0	2	-1	0	2	0	0	2	0	0	0	0	0	0	2	0	-1	0	0	2	2	0	2	2
AM279	75823915	75931102	107187	0	2	-1	2	0	2	0	2	0	-1	0	2	0	2	2	2	2	2	0	0	2	2	0	2	-1	0	-1	0	0	2	0	0	0	0	0	0	2	0	-1	0	0	2	2	0	2	2
AM275	75931103	75996870	65767	0	2	-1	2	0	2	0	2	0	-1	0	2	0	2	2	2	2	2	0	0	2	2	0	2	-1	0	-1	0	0	2	0	0	0	0	0	0	2	0	-1	0	0	2	2	0	2	2
AM278	75996871	76193529	196658	0	2	-1	2	0	2	0	2	0	-1	0	2	0	2	2	2	2	2	0	0	2	2	0	2	-1	0	2	0	0	2	0	0	0	0	0	0	2	0	-1	0	0	2	2	0	2	2
AM281	76193530	76251858	58328	0	2	-1	2	0	2	0	2	0	-1	0	2	0	2	2	2	2	2	0	0	2	2	0	2	-1	0	-1	0	0	2	0	0	0	0	0	0	2	0	-1	0	0	2	2	0	2	2
AM282	76251859	76312453	60594	0	2	-1	2	0	2	0	2	0	-1	0	2	0	2	2	2	2	2	0	0	2	2	0	2	-1	0	-1	0	0	2	0	0	0	0	0	0	2	0	-1	0	0	2	2	0	2	2
AM283	76312454	76329640	17186	0	2	-1	2	0	2	0	2	0	-1	0	2	0	2	2	2	2	2	0	0	2	2	0	2	-1	0	0	0	0	2	0	0	0	0	0	0	2	0	-1	0	0	2	2	0	2	2
AM280	76329641	76837871	508230	0	2	-1	2	0	2	0	2	0	-1	0	2	0	2	2	2	2	2	0	0	2	2	0	2	-1	0	0	0	0	2	0	0	0	0	0	0	2	0	-1	0	0	2	2	0	2	2
AM284	76837872	77196295	358423	0	2	-1	2	0	2	0	2	0	-1	0	2	0	2	2	2	2	2	0	0	2	2	0	2	-1	0	2	0	0	2	0	0	0	0	0	0	2	0	-1	0	0	2	2	0	2	2
AM285	77196296	77219389	23093	0	2	2	2	0	2	0	2	0	-1	0	2	0	2	2	2	2	2	0	0	2	2	0	2	-1	0	2	0	0	2	0	0	0	0	0	0	2	0	-1	0	0	2	2	0	2	2
AM286	77219390	77268825	49435	0	2	2	2	0	2	0	2	0	-1	0	2	0	2	2	2	2	2	0	0	2	2	0	2	-1	0	2	0	0	2	0	0	0	0	0	0	2	0	-1	0	0	2	2	0	2	2
AM288	77268826	79013592	1744766	0	2	2	2	0	2	0	2	0	-1	0	2	0	2	2	2	2	2	0	0	2	2	0	2	-1	0	2	0	0	2	0	0	0	0	0	0	2	0	-1	0	0	2	2	0	2	2
AM287	79013593	79083730	70137	0	2	2	2	0	2	0	2	0	-1	0	2	0	2	2	2	2	2	0	0	2	2	0	2	-1	0	2	0	0	2	0	0	0	0	0	0	2	0	-1	0	0	2	2	0	2	2
AM289	79083731	82350666	3266935	0	2	2	2	0	2	0	2	0	-1	0	2	0	2	2	2	2	2	0	0	2	2	0	2	-1	0	2	0	0	2	0	0	0	0	0	0	2	0	-1	0	0	2	2	0	2	2
AM290	82350667	82495931	145264	0	2	2	2	0	2	0	2	0	-1	0	2	0	2	2	2	2	2	0	0	2	2	0	2	-1	0	2	0	0	2	0	0	0	0	0	0	2	0	2	0	0	2	2	0	2	2
AM291	82495932	82593942	98010	0	2	2	2	0	2	0	2	0	-1	0	2	0	2	2	2	2	2	0	0	2	2	0	2	-1	0	2	0	0	2	0	0	0	0	0	0	2	0	2	0	0	2	2	0	0	2
AM292	82593943	83595572	1001629	0	2	2	2	0	2	0	2	0	-1	0	2	0	2	2	2	2	2	0	0	2	2	0	2	-1	0	-1	0	0	2	0	0	0	0	0	0	2	0	2	0	0	2	2	0	0	2
AM293	83595573	85972427	2376854	0	2	2	2	0	2	0	2	0	-1	0	2	0	2	2	2	2	2	0	0	2	2	0	2	-1	0	-1	0	0	2	0	0	0	0	0	0	2	0	2	0	0	2	2	0	0	2
AM294	85972428	88285329	2312901	0	2	2	2	0	2	0	2	0	-1	0	2	0	2	2	2	2	2	0	0	2	2	0	2	-1	0	-1	0	0	2	0	0	0	0	0	0	2	0	2	0	0	2	2	0	0	2
AM296	88285330	93873677	5588347	0	2	2	2	0	2	0	2	0	-1	0	2	0	2	2	2	2	2	0	0	2	2	0	2	-1	0	-1	0	0	2	0	0	0	0	0	0	2	0	2	0	0	2	2	0	0	2
AM295	93873678	96251995	2378317	0	2	2	2	0	2	0	2	0	-1	0	2	0	2	2	2	2	2	0	0	2	2	0	2	-1	0	-1	0	0	2	0	0	0	0	0	0	2	0	2	0	0	2	2	0	0	2
AM297	96251996	99485741	3233745	0	2	2	2	0	2	0	2	0	-1	0	2	0	2	2	2	2	2	0	0	2	2	0	2	-1	0	-1	0	0	2	0	0	0	0	0	0	2	0	2	0	0	2	2	0	0	2
AM298	99485742	121821937	22336195	0	2	2	2	0	2	0	2	0	-1	0	2	0	2	2	2	2	2	0	0	2	2	0	2	-1	0	-1	0	0	2	0	0	0	0	0	0	2	0	2	0	0	2	2	0	0	2
AM300	121821938	123244041	1422103	0	2	2	2	0	2	0	2	0	-1	0	2	0	2	2	2	2	2	0	0	2	2	0	2	-1	0	-1	0	0	2	0	0	0	0	0	0	2	0	2	0	0	2	2	0	0	2
AM302	123244042	128196152	4952110	0	2	2	2	0	2	0	2	0	-1	0	2	0	2	2	2	2	2	0	0	2	2	0	2	-1	0	-1	0	0	2	0	0	0	0	0	0	2	0	2	0	0	2	2	0	0	2
AM304	128196153	130969681	2773528	0	2	2	2	0	2	0	2	0	-1	0	2	0	2	2	2	2	2	0	0	2	2	0	2	-1	0	-1	0	0	2	0	0	0	0	0	0	2	0	2	0	0	2	2	0	0	2
AM306	130969682	138323402	7353720	0	2	2	2	0	2	0	2	0	-1	0	2	0	2	2	2	2	2	0	0	2	2	0	2	-1	0	-1	0	0	2	0	0	0	0	0	0	2	0	2	0	0	2	2	0	0	2
AM299	138323403	140567405	2244002	0	2	2	2	0	2	0	2	0	-1	0	2	0	2	2	2	2	2	0	0	2	2	0	2	-1	0	-1	0	0	2	0	0	0	0	0	0	2	0	2	0	0	2	2	0	0	2
AM301	140567406	166663914	26096508	0	2	2	2	0	2	0	2	0	-1	0	2	0	2	2	2	2	2	0	0	2	2	0	2	-1	0	-1	0	0	2	0	0	0	0	0	0	2	0	2	0	0	2	2	0	0	2
AM303	166663915	168559459	1895544	0	2	2	2	0	2	0	2	0	-1	0	2	0	2	2	2	2	2	0	0	2	2	0	2	-1	0	-1	0	0	2	0	0	0	0	0	0	2	0	2	0	0	2	2	0	0	2
AM305	168559460	181673718	13114258	0	2	2	2	0	2	0	2	0	-1	0	2	0	2	2	2	2	2	0	0	2	2	0	2	-1	0	-1	0	0	2	0	0	0	0	0	0	2	0	2	0	0	2	2	0	0	2
AM307	181673719	185245724	3572005	0	2	2	2	0	2	0	2	0	-1	0	2	0	2	2	2	2	2	0	0	2	2	0	2	-1	0	-1	0	0	2	0	0	0	0	0	0	2	0	2	0	0	2	2	0	0	2
AM309	185245725	192475941	7230216	0	2	2	2	0	2	0	2	0	-1	0	2	0	2	2	2	2	2	0	0	2	2	0	2	-1	0	-1	0	0	2	0	0	0	0	0	0	2	0	2	0	0	2	2	0	0	2
AM311	192475942	197155459	4679517	0	2	2	2	0	2	0	2	0	-1	0	2	0	2	2	2	2	2	0	0	2	2	0	2	-1	0	-1	0	0	2	0	0	0	0	0	0	2	0	2	0	0	2	2	0	0	2
AM313	197155460	200052354	2896894	0	2	2	2	0	2	0	2	0	-1	0	2	0	2	2	2	2	2	0	0	2	2	0	2	-1	0	-1	0	0	2	0	0	0	0	0	0	2	0	2	0	0	2	2	0	0	2
AM315	200052355	201293140	1240785	0	2	2	2	0	2	0	2	0	-1	0	2	0	2	2	2	2	2	0	0	2	2	0	2	-1	0	-1	0	0	2	0	0	0	0	0	0	2	0	2	0	0	2	2	0	0	2
AM308	201293141	222881139	21587998	0	2	2	2	0	2	0	2	0	-1	0	2	0	2	2	2	2	2	0	0	2	2	0	2	-1	0	-1	0	0	2	0	0	0	0	0	0	2	0	2	0	0	2	2	0	0	2
AM310	222881140	224810182	1929042	0	2	2	2	0	2	0	2	0	-1	0	2	0	2	2	2	2	2	0	0	2	2	0	2	-1	0	-1	0	0	2	0	0	0	0	0	0	2	0	2	0	0	2	2	0	0	2
AM312	224810183	231610276	6800093	0	2	2	2	0	2	0	2	0	-1	0	2	0	2	2	2	2	2	0	0	2	2	0	2	-1	0	-1	0	0	2	0	0	0	0	0	0	2	0	2	0	0	2	2	0	0	2
AM314	231610277	236480508	4870231	0	2	2	2	0	2	0	2	0	-1	0	2	0	2	2	2	2	2	0	0	2	2	0	2	-1	0	-1	0	0	2	0	0	0	0	0	0	2	0	2	0	0	2	2	0	0	2
AM316	236480509	238947271	2466762	0	2	2	2	0	2	0	2	0	-1	0	2	0	2	2	2	2	2	0	0	2	2	0	2	-1	0	-1	0	0	2	0	0	0	0	0	0	2	0	2	0	0	2	2	0	0	2
AM318	238947272	240292890	1345618	0	2	2	2	0	2	0	2	0	-1	0	2	0	2	2	2	2	2	0	0	2	2	0	2	-1	0	-1	0	0	2	0	0	0	0	0	0	2	0	2	0	0	2	2	0	0	2
AM320	240292891	243090681	2797790	0	2	2	2	0	2	0	2	0	-1	0	2	0	2	2	2	2	2	0	0	2	2	0	2	-1	0	-1	0	0	2	0	0	0	0	0	0	2	0	2	0	0	2	2	0	0	2
AM317	243090682	244492444	1401762	0	2	2	2	0	2	0	2	0	-1	0	2	0	2	2	2	2	2	0	0	2	2	0	2	-1	0	-1	0	0	2	0	0	0	0	0	0	2	0	2	0	0	2	2	0	0	2
AM319	244492445	255542591	11050146	0	2	2	2	0	2	0	2	0	-1	0	2	0	2	2	2	2	2	0	0	2	2	0	2	-1	0	-1	0	0	2	0	0	0	0	0	0	2	0	2	0	0	2	2	0	0	2
AM321	255542592	257067666	1525074	0	2	2	2	0	2	0	2	0	-1	0	2	0	2	2	2	2	2	0	0	2	2	0	2	-1	0	-1	0	0	2	0	0	0	0	0	0	2	0	2	0	0	2	2	0	0	2
AM322	257067667	257189766	122099	0	2	2	2	0	2	0	2	0	-1	0	2	0	2	2	2	2	2	0	0	2	2	0	2	-1	0	-1	0	0	2	0	0	0	0	0	0	2	0	2	0	0	2	2	0	0	2
AM323	257189767	257993049	803282	0	2	2	2	0	2	0	2	0	-1	0	2	0	2	2	2	2	2	0	0	2	2	0	2	-1	0	-1	0	0	2	0	0	0	0	0	0	2	0	2	0	0	2	2	0	0	2
AM325	257993050	258347914	354864	0	2	2	2	0	2	0	2	0	-1	0	2	0	2	2	2	2	2	0	0	2	2	0	2	-1	0	-1	0	0	2	0	0	0	0	0	0	2	0	2	0	0	2	2	0	0	2
AM327	258347915	258641270	293355	0	2	2	2	0	2	0	2	0	-1	0	2	0	2	2	2	2	2	0	0	2	2	0	2	-1	0	-1	0	0	2	0	0	0	0	0	0	2	0	2	0	0	2	2	0	0	2
AM329	258641271	259699736	1058465	0	2	2	2	0	2	0	2	0	-1	0	2	0	2	2	2	2	2	0	0	2	2	0	2	-1	0	-1	0	0	2	0	0	0	0	0	0	2	0	2	0	0	2	2	0	0	2
AM331	259699737	259838440	138703	0	2	2	2	0	2	0	2	0	-1	0	2	0	2	2	2	2	2	0	0	2	2	0	2	-1	0	-1	0	0	2	0	0	0	0	0	0	2	0	2	0	0	2	2	0	0	2
AM324	259838441	263921954	4083513	0	2	2	2	0	2	0	2	0	-1	0	2	0	2	2	2	2	2	0	0	2	2	0	2	-1	0	-1	0	0	2	0	0	0	0	0	0	2	0	2	0	0	2	2	0	0	2
AM326	263921955	264604606	682651	0	2	2	2	0	2	0	2	0	-1	0	2	0	2	2	2	2	2	0	0	2	2	0	2	-1	0	-1	0	0	2	0	0	0	0	0	0	2	0	2	0	0	2	2	0	0	2
AM328	264604607	264823046	218439	0	2	2	2	0	2	0	2	0	-1	0	2	0	2	2	2	2	2	0	0	2	2	0	2	-1	0	-1	0	0	2	0	0	0	0	0	0	2	0	2	0	0	2	2	0	0	2
AM330	264823047	265940777	1117730	0	2	2	2	0	2	0	2	0	-1	0	2	0	2	2	2	2	2	0	0	2	2	0	2	-1	0	-1	0	0	2	0	0	0	0	0	0	2	0	2	0	0	2	2	0	0	2
AM332	265940778	266528331	587553	0	2	2	2	0	2	0	2	0	-1	0	2	0	2	2	2	2	2	0	0	2	2	0	2	-1	0	-1	0	0	2	0	0	0	0	0	0	2	0	2	0	0	2	2	0	0	2
AM335	266528332	266639172	110840	0	2	2	2	0	2	0	2	0	-1	0	2	0	2	2	2	2	2	0	0	2	2	0	2	-1	0	0	0	0	2	0	0	0	0	0	0	2	0	2	0	0	2	2	0	0	2
AM336	266639173	266787607	148434	0	2	2	2	0	2	0	2	0	-1	0	2	0	2	2	2	2	2	0	0	2	2	0	2	-1	0	0	0	0	2	0	0	0	0	0	0	2	0	2	0	0	2	2	0	0	2
AM337	266787608	268273952	1486344	0	2	2	2	0	2	0	2	0	-1	0	2	0	2	2	2	2	2	0	0	2	2	0	2	-1	0	-1	0	0	2	0	0	0	0	0	0	2	0	2	0	0	2	2	0	0	2
AM334	268273953	268431176	157223	0	2	2	2	0	2	0	2	0	-1	0	2	0	2	2	2	2	2	0	0	2	2	0	2	-1	0	2	0	0	2	0	0	0	0	0	0	2	0	2	0	0	2	2	0	0	2
AM333	268431177	268787926	356749	0	2	2	2	0	2	0	2	0	-1	0	2	0	2	2	2	2	2	0	0	2	2	0	2	-1	0	-1	0	0	2	0	0	0	0	0	0	2	0	2	0	0	2	2	0	0	2
AM338	268787927	268804108	16181	0	2	2	2	0	2	0	2	0	-1	0	2	0	2	2	2	2	2	0	0	2	2	0	2	-1	0	-1	0	0	2	0	0	0	0	0	0	2	0	2	0	0	2	2	0	0	2
AM342	268804109	268951597	147488	0	2	2	2	0	2	0	2	0	-1	0	2	0	2	2	2	2	2	0	0	2	2	0	2	-1	0	2	0	0	2	0	0	0	0	0	0	2	0	2	0	0	2	2	0	0	2
AM341	268951598	269031654	80056	0	2	2	2	0	2	0	2	0	-1	0	2	0	2	2	2	2	2	0	0	2	2	0	2	-1	0	2	0	0	2	0	0	0	0	0	0	2	0	2	0	0	2	2	0	0	2
AM340	269031655	269138512	106857	0	2	2	2	0	2	0	2	0	-1	0	2	0	2	2	2	2	2	0	0	2	2	0	2	-1	0	-1	0	0	2	0	0	0	0	0	0	2	0	2	0	0	2	2	0	0	2
AM344	269138513	269204343	65830	0	2	2	2	0	2	0	2	0	-1	0	2	0	2	2	2	2	2	0	0	2	2	0	2	-1	0	-1	0	0	2	0	0	0	0	0	0	2	0	2	0	0	2	2	0	0	2
AM346	269204344	269244585	40241	0	2	2	2	0	2	0	2	0	-1	0	2	0	2	2	2	2	2	0	0	2	2	0	2	-1	0	2	0	0	2	0	0	0	0	0	0	2	0	2	0	0	2	2	0	0	2
AM348	269244586	269589760	345174	0	2	2	2	0	2	0	2	0	-1	0	2	0	2	2	2	2	2	0	0	2	2	0	2	-1	0	2	0	0	2	0	0	0	0	0	0	2	0	2	0	0	2	2	0	0	2
AM347	269589761	269649370	59609	0	2	2	2	0	2	0	2	0	-1	0	2	0	2	2	2	2	2	0	0	2	2	0	2	-1	0	2	0	0	2	0	0	0	0	0	0	2	0	2	0	0	2	2	0	0	2
AM349	269649371	269962964	313593	0	2	2	2	0	2	0	2	0	-1	0	2	0	2	2	2	2	2	0	0	2	2	0	2	-1	0	2	0	0	2	0	0	0	0	0	0	2	0	2	0	0	2	2	0	0	2
AM350	269962965	270498639	535674	0	2	2	2	0	2	0	2	0	-1	0	2	0	2	2	2	2	2	0	0	2	2	0	2	-1	0	-1	0	0	2	0	0	0	0	0	0	2	0	2	0	0	2	2	0	0	2
AM339	270498640	270656856	158216	0	2	2	2	0	2	0	2	0	-1	0	2	0	2	2	2	2	2	0	0	2	2	0	2	-1	0	2	0	0	2	0	0	0	0	0	0	2	0	2	0	0	2	2	0	0	2
AM343	270656857	270852167	195310	0	2	2	2	0	2	0	2	0	-1	0	2	0	2	2	2	2	2	0	0	2	2	0	2	-1	0	-1	0	0	2	0	0	0	0	0	0	2	0	2	0	0	2	2	0	0	2
AM345	270852168	270872601	20433	0	2	2	2	0	2	0	2	0	-1	0	2	0	2	2	2	2	2	0	0	2	2	0	2	-1	0	-1	0	0	2	0	0	0	0	0	0	2	0	2	0	0	2	2	0	0	2
AM351	270872602	270923788	51186	0	2	2	2	0	2	0	2	0	-1	0	2	0	2	2	2	2	2	0	0	2	2	0	2	-1	0	2	0	0	2	0	0	0	0	0	0	2	0	2	0	0	2	2	0	0	2
AM352	270923789	271764008	840219	0	2	2	2	0	2	0	2	0	-1	0	2	0	2	2	2	2	2	0	0	2	2	0	2	-1	0	2	0	0	2	0	0	0	0	0	0	2	0	2	0	0	2	2	0	0	2
AM353	271764009	272070238	306229	0	2	2	2	0	2	0	2	0	-1	0	2	0	2	2	2	2	2	0	0	2	2	0	2	-1	0	-1	0	0	2	0	0	0	0	0	0	2	0	2	0	0	2	2	0	0	2
AM355	272070239	272254667	184428	0	2	2	2	0	2	0	2	0	-1	0	2	0	2	2	2	2	2	0	0	2	2	0	2	-1	0	-1	0	0	2	0	0	0	0	0	0	2	0	2	0	0	2	2	0	0	2
AM359	272254668	272303777	49109	0	2	2	2	0	2	0	2	0	-1	0	2	0	2	2	2	2	2	0	0	2	2	0	2	-1	0	-1	0	0	2	0	0	0	0	0	0	2	0	2	0	0	2	2	0	0	2
AM356	272303778	272452329	148551	0	2	2	2	0	2	0	2	0	-1	0	2	0	2	2	2	2	2	0	0	2	2	0	2	-1	0	0	0	0	2	0	0	0	0	0	0	2	0	2	0	0	2	2	0	0	2
AM358	272452330	272571714	119384	0	2	2	2	0	2	0	2	0	-1	0	2	0	2	2	2	2	2	0	0	2	2	0	2	-1	0	0	0	0	2	0	0	0	0	0	0	2	0	2	0	0	2	2	0	0	2
AM357	272571715	272724438	152723	0	2	2	2	0	2	0	2	0	-1	0	2	0	2	2	2	2	2	0	0	2	2	0	2	-1	0	0	0	0	2	0	0	0	0	0	0	2	0	2	0	0	2	2	0	0	2
AM354	272724439	280668156	7943717	0	2	2	2	0	2	0	2	0	-1	0	2	0	2	2	2	2	2	0	0	2	2	0	2	-1	0	-1	0	0	2	0	0	0	0	0	0	2	0	2	0	0	2	2	0	0	2
AM360	280668157	281459743	791586	0	2	2	2	0	2	0	2	0	-1	0	2	0	2	2	2	2	2	0	0	2	2	0	2	-1	0	-1	0	0	2	0	0	0	0	0	0	2	0	2	0	0	2	2	0	0	2
AM362	281459744	283349498	1889754	0	2	2	2	0	2	0	2	0	-1	0	2	0	2	2	2	2	2	0	0	2	2	0	2	-1	0	-1	0	0	2	0	0	0	0	0	0	2	0	2	0	0	2	2	0	0	2
AM364	283349499	283430438	80939	0	2	2	2	0	2	0	2	0	-1	0	2	0	2	2	2	2	2	0	0	2	2	0	2	-1	0	-1	0	0	2	0	0	0	0	0	0	2	0	2	0	0	2	2	0	0	2
AM366	283430439	289130479	5700040	0	2	2	2	0	2	0	2	0	-1	0	2	0	2	2	2	2	2	0	0	2	2	0	2	-1	0	-1	0	0	2	0	0	0	0	0	0	2	0	2	0	0	2	2	0	0	2
AM361	289130480	291571359	2440879	0	2	2	2	0	2	0	2	0	-1	0	2	0	2	2	2	2	2	0	0	2	2	0	2	-1	0	-1	0	0	2	0	0	0	0	0	0	2	0	2	0	0	2	2	0	0	2
AM363	291571360	294507295	2935935	0	2	2	2	0	2	0	2	0	-1	0	2	0	2	2	2	2	2	0	0	2	2	0	2	-1	0	-1	0	0	2	0	0	0	0	0	0	2	0	2	0	0	2	2	0	0	2
AM365	294507296	299079192	4571896	0	2	2	2	0	2	0	2	0	-1	0	2	0	2	2	2	2	2	0	0	2	2	0	2	-1	0	-1	0	0	2	0	0	0	0	0	0	2	0	2	0	0	2	2	0	0	2
AM367	299079193	304940991	5861798	0	2	2	2	0	2	0	2	0	-1	0	2	0	2	2	2	2	2	0	0	2	2	0	2	-1	0	-1	0	0	2	0	0	0	0	0	0	2	0	2	0	0	2	2	0	0	2
AM368	304940992	304990810	49818	0	2	2	2	0	2	0	2	0	-1	0	2	0	2	2	2	2	2	0	0	2	2	0	2	-1	0	2	0	0	2	0	0	0	0	0	0	2	0	2	0	0	2	2	0	0	2
AM370	304990811	305157400	166589	0	2	2	2	0	2	0	2	0	-1	0	2	0	2	2	2	2	2	0	0	2	2	0	2	-1	0	2	0	0	2	0	0	0	0	0	0	2	0	2	0	0	2	2	0	0	2
AM369	305157401	305254090	96689	0	2	2	2	0	2	0	2	0	-1	0	2	0	2	2	2	2	2	0	0	2	2	0	2	-1	0	2	0	0	2	0	0	0	0	0	0	2	0	2	0	0	2	2	0	0	2
AM371	305254091	305524836	270745	0	2	2	2	0	2	0	2	0	-1	0	2	0	2	2	2	2	2	0	0	2	2	0	2	-1	0	2	0	0	2	0	0	0	0	0	0	2	0	2	0	0	2	2	0	0	2
AM372	305524837	305599012	74175	0	2	2	2	0	2	0	2	0	-1	0	2	0	2	2	2	2	2	0	0	2	2	0	2	-1	0	2	0	0	2	0	0	0	0	0	0	2	0	2	0	0	2	2	0	0	2
AM374	305599013	305757274	158261	0	2	2	2	0	2	0	2	0	-1	0	2	0	2	2	2	2	2	0	0	2	2	0	2	-1	0	2	0	0	2	0	0	0	0	0	0	2	0	2	0	0	2	2	0	0	2
AM373	305757275	305883187	125912	0	2	2	2	0	2	0	2	0	-1	0	2	0	2	2	2	2	2	0	0	2	2	0	2	-1	0	2	0	0	2	0	0	0	0	0	0	2	0	2	0	0	2	2	0	0	2
AM375	305883188	306013481	130293	0	2	2	2	0	2	0	2	0	-1	0	2	0	2	2	2	2	2	0	0	2	2	0	2	-1	0	2	0	0	2	0	0	0	0	0	0	2	0	2	0	0	2	2	0	0	2
AM376	306013482	306211491	198009	0	2	2	2	0	2	0	2	0	-1	0	2	0	2	2	2	2	2	0	0	2	2	0	2	-1	0	2	0	0	2	0	0	0	0	0	0	2	0	2	0	0	2	2	0	0	2
AM378	306211492	306415161	203669	0	2	2	2	0	2	0	2	0	-1	0	2	0	2	2	2	2	2	0	0	2	2	0	2	-1	0	2	0	0	2	0	0	0	0	0	0	2	0	2	0	0	2	2	0	0	2
AM382	306415162	307957323	1542161	0	2	2	2	0	2	0	2	0	-1	0	2	0	2	2	2	2	2	0	0	2	2	0	2	-1	0	2	0	0	2	0	0	0	0	0	0	2	0	2	0	0	2	2	0	0	2
AM377	307957324	308199223	241899	0	2	2	2	0	2	0	2	0	-1	0	2	0	2	2	2	2	2	0	0	2	2	0	2	-1	0	2	0	0	2	0	0	0	0	0	0	2	0	2	0	0	2	2	0	0	2
AM379	308199224	308312463	113239	0	2	2	2	0	2	0	2	0	-1	0	2	0	2	2	2	2	2	0	0	2	2	0	2	-1	0	2	0	0	2	0	0	0	0	0	0	2	0	2	0	0	2	2	0	0	2
AM381	308312464	308570655	258191	0	2	2	2	0	2	0	2	0	-1	0	2	0	2	2	2	2	2	0	0	2	2	0	2	-1	0	2	0	0	2	0	0	0	0	0	0	2	0	2	0	0	2	2	0	0	2
AM383	308570656	309013868	443212	0	2	2	2	0	2	0	2	0	-1	0	2	0	2	2	2	2	2	0	0	2	2	0	2	-1	0	2	0	0	2	0	0	0	0	0	0	2	0	2	0	0	2	2	0	0	2
AM380	309013869	309228513	214644	0	2	2	2	0	2	0	2	0	-1	0	2	0	2	2	2	2	2	0	0	2	2	0	2	-1	0	2	0	0	2	0	0	0	0	0	0	2	0	2	0	0	2	2	0	0	2
AM385	309228514	309325227	96713	0	2	2	2	0	2	0	2	0	-1	0	2	0	2	2	2	2	2	0	0	2	2	0	2	-1	0	2	0	0	2	0	0	0	0	0	0	2	0	2	0	0	2	2	0	0	2
AM384	309325228	309560061	234833	0	2	2	2	0	2	0	2	0	-1	0	2	0	2	2	2	2	2	0	0	2	2	0	2	-1	0	2	0	0	2	0	0	0	0	0	0	2	0	2	0	0	2	2	0	0	2
AM386	309560062	309755255	195193	0	2	2	2	0	2	0	2	0	-1	0	2	0	2	2	2	2	2	0	0	2	2	0	2	-1	0	2	0	0	2	0	0	0	0	0	0	2	0	2	0	0	2	2	0	0	2
AM388	309755256	310476395	721139	0	2	2	2	0	2	0	2	0	-1	0	2	0	2	2	2	2	2	0	0	2	2	0	2	-1	0	2	0	0	2	0	0	0	0	0	0	2	0	2	0	0	2	2	0	0	2
AM392	310476396	310863073	386677	0	2	2	2	0	2	0	2	0	-1	0	2	0	2	2	2	2	2	0	0	2	2	0	2	-1	0	2	0	0	2	0	0	0	0	0	0	2	0	2	0	0	2	2	0	0	2
AM387	310863074	310994752	131678	0	2	2	2	0	2	0	2	0	-1	0	2	0	2	2	2	2	2	0	0	2	2	0	2	-1	0	2	0	0	2	0	0	0	0	0	0	2	0	2	0	0	2	2	0	0	2
AM389	310994753	311107758	113005	0	2	2	2	0	2	0	2	0	-1	0	2	0	2	2	2	2	2	0	0	2	2	0	2	-1	0	2	0	0	2	0	0	0	0	0	0	2	0	2	0	0	2	2	0	0	2
AM391	311107759	311124363	16604	0	2	2	2	0	2	0	2	0	-1	0	2	0	2	2	2	2	2	0	0	2	2	0	2	-1	0	2	0	0	2	0	0	0	0	0	0	2	0	2	0	0	2	2	0	0	2
AM393	311124364	311310997	186633	0	2	2	2	0	2	0	2	0	-1	0	2	0	2	2	2	2	2	0	0	2	2	0	2	-1	0	2	0	0	2	0	0	0	0	0	0	2	0	2	0	0	2	2	0	0	2
AM394	311310998	311547226	236228	0	2	2	2	0	2	0	2	0	-1	0	2	0	2	2	2	2	2	0	0	2	2	0	2	-1	0	2	0	0	2	0	0	0	0	0	0	2	0	2	0	0	2	2	0	0	2
AM395	311547227	311887088	339861	0	2	2	2	0	2	0	2	0	-1	0	2	0	2	2	2	2	2	0	0	2	2	0	2	-1	0	2	0	0	2	0	0	0	0	0	0	2	0	2	0	0	2	2	0	0	2
AM390	311887089	311993490	106401	0	2	2	2	0	2	0	2	0	-1	0	2	0	2	2	2	2	2	0	0	2	2	0	2	-1	0	2	0	0	2	0	0	0	0	0	0	2	0	2	0	0	2	2	0	0	2
AM396	311993491	312091385	97894	0	2	2	2	0	2	0	2	0	-1	0	2	0	2	2	2	2	2	0	0	2	2	0	2	-1	0	2	0	0	2	0	0	0	0	0	0	2	0	2	0	0	2	2	0	0	2
AM398	312091386	312718892	627506	0	2	2	2	0	2	0	2	0	-1	0	2	0	2	2	2	2	2	0	0	2	2	0	2	-1	0	2	0	0	2	0	0	0	0	0	0	2	0	2	0	0	2	2	0	0	2
AM402	312718893	312947323	228430	0	2	2	2	0	2	0	2	0	-1	0	2	0	2	2	2	2	2	0	0	2	2	0	2	-1	0	2	0	0	2	0	0	0	0	0	0	2	0	2	0	0	2	2	0	0	2
AM397	312947324	313014070	66746	0	2	2	2	0	2	0	2	0	-1	0	2	0	2	2	2	2	2	0	0	2	2	0	2	-1	0	2	0	0	2	0	0	0	0	0	0	2	0	2	0	0	2	2	0	0	2
AM399	313014071	313168313	154242	0	2	2	2	0	2	0	2	0	-1	0	2	0	2	2	2	2	2	0	0	2	2	0	2	-1	0	2	0	0	2	0	0	0	0	0	0	2	0	2	0	0	2	2	0	0	2
AM401	313168314	313479228	310914	0	2	2	2	0	2	0	2	0	-1	0	2	0	2	2	2	2	2	0	0	2	2	0	2	-1	0	2	0	0	2	0	0	0	0	0	0	2	0	2	0	0	2	2	0	0	2
AM403	313479229	313674940	195711	0	2	2	2	0	2	0	2	0	-1	0	2	0	2	2	2	2	2	0	0	2	2	0	2	-1	0	2	0	0	2	0	0	0	0	0	0	2	0	2	0	0	2	2	0	0	2
AM400	313674941	315527055	1852114	0	2	2	2	0	2	0	2	0	-1	0	2	0	2	2	2	2	2	0	0	2	2	0	2	-1	0	2	0	0	2	0	0	0	0	0	0	2	0	2	0	0	2	2	0	0	2
AM404	315527056	315829490	302434	0	2	2	2	0	2	0	2	0	-1	0	2	0	2	2	2	2	2	0	0	2	2	0	2	-1	0	2	0	0	2	0	0	0	0	0	0	2	0	2	0	0	2	2	0	0	2
AM406	315829491	315889447	59956	0	2	2	2	0	2	0	2	0	-1	0	2	0	2	2	2	2	2	0	0	2	2	0	2	-1	0	2	0	0	2	0	0	0	0	0	0	2	0	2	0	0	2	2	0	0	2
AM410	315889448	315998215	108767	0	2	2	2	0	2	0	2	0	-1	0	2	0	2	2	2	2	2	0	0	2	2	0	2	-1	0	2	0	0	2	0	0	0	0	0	0	2	0	2	0	0	2	2	0	0	2
AM405	315998216	316034345	36129	0	2	2	2	0	2	0	2	0	-1	0	2	0	2	2	2	2	2	0	0	2	2	0	2	-1	0	2	0	0	2	0	0	0	0	0	0	2	0	2	0	0	2	2	0	0	2
AM407	316034346	316078033	43687	0	2	2	2	0	2	0	2	0	-1	0	2	0	2	2	2	2	2	0	0	2	2	0	2	-1	0	2	0	0	2	0	0	0	0	0	0	2	0	2	0	0	2	2	0	0	2
AM409	316078034	316320506	242472	0	2	2	2	0	2	0	2	0	-1	0	2	0	2	2	2	2	2	0	0	2	2	0	2	-1	0	2	0	0	2	0	0	0	0	0	0	2	0	2	0	0	2	2	0	0	2
AM411	316320507	316744671	424164	0	2	2	2	0	2	0	2	0	-1	0	2	0	2	2	2	2	2	0	0	2	2	0	2	-1	0	2	0	0	2	0	0	0	0	0	0	2	0	2	0	0	2	2	0	0	2
AM412	316744672	317796252	1051580	0	2	2	2	0	2	0	2	0	-1	0	2	0	2	2	2	2	2	0	0	2	2	0	2	-1	0	2	0	0	2	0	0	0	0	0	0	2	0	2	0	0	2	2	0	0	2
AM413	317796253	318011205	214952	0	2	2	2	0	2	0	2	0	-1	0	2	0	2	2	2	2	2	0	0	2	2	0	2	-1	0	2	0	0	2	0	0	0	0	0	0	2	0	2	0	0	2	2	0	0	2
AM408	318011206	318040287	29081	0	2	2	2	0	2	0	2	0	-1	0	2	0	2	2	2	2	2	0	0	2	2	0	2	-1	0	2	0	0	2	0	0	0	0	0	0	2	0	2	0	0	2	2	0	0	2
AM414	318040288	318117361	77073	0	2	2	2	0	2	0	2	0	-1	0	2	0	2	2	2	2	2	0	0	2	2	0	2	-1	0	2	0	0	2	0	0	0	0	0	0	2	0	2	0	0	2	2	0	0	2
AM416	318117362	318491366	374004	0	2	2	2	0	2	0	2	0	-1	0	2	0	2	2	2	2	2	0	0	2	2	0	2	-1	0	2	0	0	2	0	0	0	0	0	0	2	0	2	0	0	2	2	0	0	2
AM415	318491367	318620062	128695	0	2	2	2	0	2	0	2	0	-1	0	2	0	2	2	2	2	2	0	0	2	2	0	2	-1	0	2	0	0	2	0	0	0	0	0	0	2	0	2	0	0	2	2	0	0	2
AM417	318620063	318983381	363318	0	2	2	2	0	2	0	2	0	-1	0	2	0	2	2	2	2	2	0	0	2	2	0	2	-1	0	2	0	0	2	0	0	0	0	0	0	2	0	2	0	0	2	2	0	0	2
AM419	318983382	319229530	246148	0	2	2	2	0	2	0	2	0	-1	0	2	0	2	2	2	2	2	0	0	2	2	0	2	-1	0	2	0	0	2	0	0	0	0	0	0	2	0	2	0	0	2	2	0	0	2
AM418	319229531	320190633	961102	0	2	2	2	0	2	0	2	0	-1	0	2	0	2	2	2	2	2	0	0	2	2	0	2	-1	0	2	0	0	2	0	0	0	0	0	0	2	0	2	0	0	2	2	0	0	2
AM420	320190634	320352580	161946	0	2	2	2	0	2	0	2	0	-1	0	2	0	2	2	2	2	2	0	0	2	2	0	2	-1	0	2	0	0	2	0	0	0	0	0	0	2	0	2	0	0	2	2	0	0	2
AM422	320352581	320548953	196372	0	2	2	2	0	2	0	2	0	-1	0	2	0	2	2	2	2	2	0	0	2	2	0	2	-1	0	2	0	0	2	0	0	0	0	0	0	2	0	2	0	0	2	2	0	0	2
AM426	320548954	320720848	171894	0	2	2	2	0	2	0	2	0	-1	0	2	0	2	2	2	2	2	0	0	2	2	0	2	-1	0	2	0	0	2	0	0	0	0	0	0	2	0	2	0	0	2	2	0	0	2
AM421	320720849	320890999	170150	0	2	2	2	0	2	0	2	0	-1	0	2	0	2	2	2	2	2	0	0	2	2	0	2	-1	0	2	0	0	2	0	0	0	0	0	0	2	0	2	0	0	2	2	0	0	2
AM423	320891000	321015472	124472	0	2	2	2	0	2	0	2	0	-1	0	2	0	2	2	2	2	2	0	0	2	2	0	2	-1	0	2	0	0	2	0	0	0	0	0	0	2	0	2	0	0	2	2	0	0	2
AM425	321015473	321338651	323178	0	2	2	2	0	2	0	2	0	-1	0	2	0	2	2	2	2	2	0	0	2	2	0	2	-1	0	2	0	0	2	0	0	0	0	0	0	2	0	2	0	0	2	2	0	0	2
AM424	321338652	321443179	104527	0	2	2	2	0	2	0	2	0	-1	0	2	0	2	2	2	2	2	0	0	2	2	0	2	-1	0	2	0	0	2	0	0	0	0	0	0	2	0	2	0	0	2	2	0	0	2
AM428	321443180	321943704	500524	0	2	2	2	0	2	0	2	0	-1	0	2	0	2	2	2	2	2	0	0	2	2	0	2	-1	0	2	0	0	2	0	0	0	0	0	0	2	0	2	0	0	2	2	0	0	2
AM429	321943705	321951910	8205	0	2	2	2	0	2	0	2	0	-1	0	2	0	2	2	2	2	2	0	0	2	2	0	2	-1	0	2	0	0	2	0	0	0	0	0	0	2	0	2	0	0	2	2	0	0	2
AM430	321951911	322027216	75305	0	2	2	2	0	2	0	2	0	-1	0	2	0	2	2	2	2	2	0	0	2	2	0	2	-1	0	2	0	0	2	0	0	0	0	0	0	2	0	2	0	0	2	2	0	0	2
AM432	322027217	322061006	33789	0	2	2	2	0	2	0	2	0	-1	0	2	0	2	2	2	2	2	0	0	2	2	0	2	-1	0	2	0	0	2	0	0	0	0	0	0	2	0	2	0	0	2	2	0	0	2
AM434	322061007	322445606	384599	0	2	2	2	0	2	0	2	0	-1	0	2	0	2	2	2	2	2	0	0	2	2	0	2	-1	0	2	0	0	2	0	0	0	0	0	0	2	0	2	0	0	2	2	0	0	2
AM436	322445607	322606176	160569	0	2	2	2	0	2	0	2	0	-1	0	2	0	2	2	2	2	2	0	0	2	2	0	2	-1	0	2	0	0	2	0	0	0	0	0	0	2	0	2	0	0	2	2	0	0	2
AM435	322606177	322667426	61249	0	2	2	2	0	2	0	2	0	-1	0	2	0	2	2	2	2	2	0	0	2	2	0	2	-1	0	2	0	0	2	0	0	0	0	0	0	2	0	2	0	0	2	2	0	0	2
AM437	322667427	322749097	81670	0	2	2	2	0	2	0	2	0	-1	0	2	0	2	2	2	2	2	0	0	2	2	0	2	-1	0	2	0	0	2	0	0	0	0	0	0	2	0	2	0	0	2	2	0	0	2
AM438	322749098	322856000	106902	0	2	2	2	0	2	0	2	0	-1	0	2	0	2	2	2	2	2	0	0	2	2	0	2	-1	0	2	0	0	2	0	0	0	0	0	0	2	0	2	0	0	2	2	0	0	2
AM427	322856001	322989181	133180	0	2	2	2	0	2	0	2	0	-1	0	2	0	2	2	2	2	2	0	0	2	2	0	2	-1	0	2	0	0	2	0	0	0	0	0	0	2	0	2	0	0	2	2	0	0	2
AM431	322989182	323079967	90785	0	2	2	2	0	2	0	2	0	-1	0	2	0	2	2	2	2	2	0	0	2	2	0	2	-1	0	2	0	0	2	0	0	0	0	0	0	2	0	2	0	0	2	2	0	0	2
AM433	323079968	323124667	44699	0	2	2	2	0	2	0	2	0	-1	0	2	0	2	2	2	2	2	0	0	2	2	0	2	-1	0	2	0	0	2	0	0	0	0	0	0	2	0	2	0	0	2	2	0	0	2
AM439	323124668	323206160	81492	0	2	2	2	0	2	0	2	0	-1	0	2	0	2	2	2	2	2	0	0	2	2	0	2	-1	0	2	0	0	2	0	0	0	0	0	0	2	0	2	0	0	2	2	0	0	2
AM440	323206161	323222010	15849	0	2	2	2	0	2	0	2	0	-1	0	2	0	2	2	2	2	2	0	0	2	2	0	2	-1	0	2	0	0	2	0	0	0	0	0	0	2	0	2	0	0	2	2	0	0	2
AM441	323222011	323315265	93254	0	2	2	2	0	2	0	2	0	-1	0	2	0	2	2	2	2	2	0	0	2	2	0	2	-1	0	2	0	0	2	0	0	0	0	0	0	2	0	2	0	0	2	2	0	0	2
AM442	323315266	323339431	24165	0	2	2	2	0	2	0	2	0	-1	0	2	0	2	2	2	2	2	0	0	2	2	0	2	-1	0	2	0	0	2	0	0	0	0	0	0	2	0	2	0	0	2	2	0	0	2
AM444	323339432	324179661	840229	0	2	2	2	0	2	0	2	0	-1	0	2	0	2	2	2	2	2	0	0	2	2	0	2	-1	0	2	0	0	2	0	0	0	0	0	0	2	0	2	0	0	2	2	0	0	2
AM446	324179662	324514881	335219	0	2	2	2	0	2	0	2	0	-1	0	2	0	2	2	2	2	2	0	0	2	2	0	2	-1	0	2	0	0	2	0	0	0	0	0	0	2	0	2	0	0	2	2	0	0	2
AM448	324514882	325041479	526597	0	2	2	2	0	2	0	2	0	-1	0	2	0	2	2	2	2	2	0	0	2	2	0	2	-1	0	2	0	0	2	0	0	0	0	0	0	2	0	2	0	0	2	2	0	0	2
AM443	325041480	325156431	114951	0	2	2	2	0	2	0	2	0	-1	0	2	0	2	2	2	2	2	0	0	2	2	0	2	-1	0	2	0	0	2	0	0	0	0	0	0	2	0	2	0	0	2	2	0	0	2
AM445	325156432	325253489	97057	0	2	2	2	0	2	0	2	0	-1	0	2	0	2	2	2	2	2	0	0	2	2	0	2	-1	0	2	0	0	2	0	0	0	0	0	0	2	0	2	0	0	2	2	0	0	2
AM447	325253490	325539687	286197	0	2	2	2	0	2	0	2	0	-1	0	2	0	2	2	2	2	2	0	0	2	2	0	2	-1	0	2	0	0	2	0	0	0	0	0	0	2	0	2	0	0	2	2	0	0	2
AM449	325539688	325663092	123404	0	2	2	2	0	2	0	2	0	-1	0	2	0	2	2	2	2	2	0	0	2	2	0	2	-1	0	2	0	0	2	0	0	0	0	0	0	2	0	2	0	0	2	2	0	0	2
AM450	325663093	325713355	50262	0	2	2	2	0	2	0	2	0	-1	0	2	0	2	2	2	2	2	0	0	2	2	0	2	-1	0	2	0	0	2	0	0	0	0	0	0	2	0	2	0	0	2	2	0	0	2
AM452	325713356	325767577	54221	0	2	2	2	0	2	0	2	0	-1	0	2	0	2	2	2	2	2	0	0	2	2	0	2	-1	0	2	0	0	2	0	0	0	0	0	0	2	0	2	0	0	2	2	0	0	2
AM454	325767578	325855613	88035	0	2	2	2	0	2	0	2	0	-1	0	2	0	2	2	2	2	2	0	0	2	2	0	2	-1	0	2	0	0	2	0	0	0	0	0	0	2	0	2	0	0	2	2	0	0	2
AM451	325855614	325924461	68847	0	2	2	2	0	2	0	2	0	-1	0	2	0	2	2	2	2	2	0	0	2	2	0	2	-1	0	2	0	0	2	0	0	0	0	0	0	2	0	2	0	0	2	2	0	0	2
AM453	325924462	325988726	64264	0	2	2	2	0	2	0	2	0	-1	0	2	0	2	2	2	2	2	0	0	2	2	0	2	-1	0	2	0	0	2	0	0	0	0	0	0	2	0	2	0	0	2	2	0	0	2
AM456	325988727	327374597	1385870	0	2	2	2	0	2	0	2	0	-1	0	2	0	2	2	2	2	2	0	0	2	2	0	2	-1	0	2	0	0	2	0	0	0	0	0	0	2	0	2	0	0	2	2	0	0	2
AM455	327374598	327517727	143129	0	2	2	2	0	2	0	2	0	-1	0	2	0	2	2	2	2	2	0	0	2	2	0	2	-1	0	2	0	0	2	0	0	0	0	0	0	2	0	2	0	0	2	2	0	0	2
AM457	327517728	327767856	250128	0	2	2	2	0	2	0	2	0	-1	0	2	0	2	2	2	2	2	0	0	2	2	0	2	-1	0	2	0	0	2	0	0	0	0	0	0	2	0	2	0	0	2	2	0	0	2
AM459	327767857	328741000	973143	0	2	2	2	0	2	0	2	0	-1	0	2	0	2	2	2	2	2	0	0	2	2	0	2	-1	0	2	0	0	2	0	0	0	0	0	0	2	0	2	0	0	2	2	0	0	2
AM461	328741001	329267976	526975	0	2	2	2	0	2	0	2	0	-1	0	2	0	2	2	2	2	2	0	0	2	2	0	2	-1	0	2	0	0	2	0	0	0	0	0	0	2	0	2	0	0	2	2	0	0	2
AM458	329267977	329326807	58830	0	2	2	2	0	2	0	2	0	-1	0	2	0	2	2	2	2	2	0	0	2	2	0	2	-1	0	2	0	0	2	0	0	0	0	0	0	2	0	2	0	0	2	2	0	0	2
AM460	329326808	329738834	412026	0	2	2	2	0	2	0	2	0	-1	0	2	0	2	2	2	2	2	0	0	2	2	0	2	-1	0	2	0	0	2	0	0	0	0	0	0	2	0	2	0	0	2	2	0	0	2
AM462	329738835	329933198	194363	0	2	2	2	0	2	0	2	0	-1	0	2	0	2	2	2	2	2	0	0	2	2	0	2	-1	0	2	0	0	2	0	0	0	0	0	0	2	0	2	0	0	2	2	0	0	2
AM464	329933199	330387055	453856	0	2	2	2	0	2	0	2	0	-1	0	2	0	2	2	2	2	2	0	0	2	2	0	2	-1	0	2	0	0	2	0	0	0	0	0	0	2	0	2	0	0	2	2	0	0	2
AM468	330387056	330576803	189747	0	2	2	2	0	2	0	2	0	-1	0	2	0	2	2	2	2	2	0	0	2	2	0	2	-1	0	2	0	0	2	0	0	0	0	0	0	2	0	2	0	0	2	2	0	0	2
AM467	330576804	330778200	201396	0	2	2	2	0	2	0	2	0	-1	0	2	0	2	2	2	2	2	0	0	2	2	0	2	-1	0	2	0	0	2	0	0	0	0	0	0	2	0	2	0	0	2	2	0	0	2
AM466	330778201	330791249	13048	0	2	2	2	0	2	0	2	0	-1	0	2	0	2	2	2	2	2	0	0	2	2	0	2	-1	0	2	0	0	2	0	0	0	0	0	0	2	0	2	0	0	2	2	0	0	2
AM463	330791250	330942013	150763	0	2	2	2	0	2	0	2	0	-1	0	2	0	2	2	2	2	2	0	0	2	2	0	2	-1	0	2	0	0	2	0	0	0	0	0	0	2	0	2	0	0	2	2	0	0	2
AM465	330942014	331018352	76338	0	2	2	2	0	2	0	2	0	-1	0	2	0	2	2	2	2	2	0	0	2	2	0	2	-1	0	2	0	0	2	0	0	0	0	0	0	2	0	2	0	0	2	2	0	0	2
AM469	331018353	331119957	101604	0	2	2	2	0	2	0	2	0	-1	0	2	0	2	2	2	2	2	0	0	2	2	0	2	-1	0	2	0	0	2	0	0	0	0	0	0	2	0	2	0	0	2	2	0	0	2
AM471	331119958	331445832	325874	0	2	2	2	0	2	0	2	0	-1	0	2	0	2	2	2	2	2	0	0	2	2	0	2	-1	0	2	0	0	2	0	0	0	0	0	0	2	0	2	0	0	2	2	0	0	2
AM473	331445833	331993922	548089	0	2	2	2	0	2	0	2	0	-1	0	2	0	2	2	2	2	2	0	0	2	2	0	2	-1	0	2	0	0	2	0	0	0	0	0	0	2	0	2	0	0	2	2	0	0	2
AM470	331993923	334557123	2563200	0	2	2	2	0	2	0	2	0	-1	0	2	0	2	2	2	2	2	0	0	2	2	0	2	-1	0	2	0	0	2	0	0	0	0	0	0	2	0	2	0	0	2	2	0	0	2
AM472	334557124	341871597	7314473	0	2	2	2	0	2	0	2	0	-1	0	2	0	2	2	2	2	2	0	0	2	2	0	2	-1	0	2	0	0	2	0	0	0	0	0	0	2	0	2	0	0	2	2	0	0	2
AM474	341871598	342513274	641676	0	2	2	2	0	2	0	2	0	-1	0	2	0	2	2	2	2	2	0	0	2	2	0	2	-1	0	2	0	0	2	0	0	0	0	0	0	2	0	2	0	0	2	2	0	0	2
AM475	342513275	342610961	97686	0	2	2	2	0	2	0	2	0	-1	0	2	0	2	2	2	2	2	0	0	2	2	0	2	-1	0	2	0	0	2	0	0	0	0	0	0	2	0	2	0	0	2	2	0	0	2
AM477	342610962	342676943	65981	0	2	2	2	0	2	0	2	0	-1	0	2	0	2	2	2	2	2	0	0	2	2	0	2	-1	0	2	0	0	2	0	0	0	0	0	0	2	0	2	0	0	2	2	0	0	2
AM476	342676944	344331592	1654648	0	2	2	2	0	2	0	2	0	-1	0	2	0	2	2	2	2	2	0	0	2	2	0	2	-1	0	2	0	0	2	0	0	0	0	0	0	2	0	2	0	0	2	2	0	0	2
AM479	344331593	344509714	178121	0	2	2	2	0	2	0	2	0	-1	0	2	0	2	2	2	2	2	0	0	2	2	0	2	-1	0	2	0	0	2	0	0	0	0	0	0	2	0	2	0	0	2	2	0	0	2
AM478	344509715	344593292	83577	0	2	2	2	0	2	0	2	0	-1	0	2	0	2	2	2	2	2	0	0	2	2	0	2	-1	0	2	0	0	2	0	0	0	0	0	0	2	0	2	0	0	2	2	0	0	2
AM480	344593293	344650188	56895	0	2	2	2	0	2	0	2	0	-1	0	2	0	2	2	2	2	2	0	0	2	2	0	2	-1	0	2	0	0	2	0	0	0	0	0	0	2	0	2	0	0	2	2	0	0	2
AM482	344650189	344744411	94222	0	2	2	2	0	2	0	2	0	-1	0	2	0	2	2	2	2	2	0	0	2	2	0	2	-1	0	2	0	0	2	0	0	0	0	0	0	2	0	2	0	0	2	2	0	0	2
AM481	344744412	344827084	82672	0	2	2	2	0	2	0	2	0	-1	0	2	0	2	2	2	2	2	0	0	2	2	0	2	-1	0	2	0	0	2	0	0	0	0	0	0	2	0	2	0	0	2	2	0	0	2
AM483	344827085	344934733	107648	0	2	2	2	0	2	0	2	0	-1	0	2	0	2	2	2	2	2	0	0	2	2	0	2	-1	0	2	0	0	2	0	0	0	2	0	0	2	0	2	0	0	2	2	0	0	2
AM485	344934734	345324095	389361	0	2	2	2	0	2	0	2	0	-1	0	2	0	2	2	2	2	2	0	0	2	2	0	2	-1	0	2	0	0	2	0	0	0	2	0	0	2	0	2	0	0	2	2	0	0	2
AM487	345324096	346306651	982555	0	2	2	2	0	2	0	2	0	-1	0	2	0	2	2	2	2	2	0	0	2	2	0	2	-1	0	2	0	0	2	0	0	0	2	0	0	2	0	2	0	0	2	2	0	0	2
AM484	346306652	346387164	80512	0	2	2	2	0	2	0	2	0	-1	0	2	0	2	2	2	2	2	0	0	2	2	0	2	-1	0	2	0	0	2	0	0	0	2	0	0	2	0	2	0	0	2	2	0	0	2
AM486	346387165	346530662	143497	0	2	2	2	0	2	0	2	0	-1	0	2	0	2	2	2	2	2	0	0	2	2	0	2	-1	0	2	0	0	2	0	0	0	2	0	0	2	0	2	0	0	2	2	0	0	2
AM488	346530663	346816976	286313	0	2	2	2	0	2	0	2	0	-1	0	2	0	2	2	2	2	2	0	0	2	2	0	2	-1	0	2	0	0	2	0	0	0	2	0	0	2	0	2	0	0	2	2	0	0	2
AM489	346816977	346965696	148719	0	2	2	2	0	2	0	2	0	-1	0	2	0	2	2	2	2	2	0	0	2	2	0	2	-1	0	2	0	0	2	0	0	0	2	0	0	2	0	2	0	0	2	2	0	0	2
AM490	346965697	347572358	606661	0	2	2	2	0	2	0	2	0	-1	0	2	0	2	2	2	2	2	0	0	2	2	0	2	-1	0	2	0	0	2	0	0	0	2	0	0	2	0	2	0	0	2	2	0	0	2
AM492	347572359	347741312	168953	0	2	2	2	0	2	0	2	0	-1	0	2	0	2	2	2	2	2	0	0	2	2	0	2	-1	0	2	0	0	2	0	0	0	2	0	0	2	0	2	0	0	2	2	0	0	2
AM494	347741313	348066868	325555	0	2	2	2	0	2	0	2	0	-1	0	2	0	2	2	2	2	2	0	0	2	2	0	2	-1	0	2	0	0	2	0	0	0	2	0	0	2	0	2	0	0	2	2	0	0	2
AM491	348066869	348784642	717773	0	2	2	2	0	2	0	2	0	-1	0	2	0	2	2	2	2	2	0	0	2	2	0	2	-1	0	2	0	0	2	0	0	0	2	0	0	2	0	2	0	0	2	2	0	0	2
AM493	348784643	348819037	34394	0	2	2	2	0	2	0	2	0	-1	0	2	0	2	2	2	2	2	0	0	2	2	0	2	-1	0	2	0	0	2	0	0	0	2	0	0	2	0	2	0	0	2	2	0	0	2
AM495	348819038	349070854	251816	0	2	2	2	0	2	0	2	0	-1	0	2	0	2	2	2	2	2	0	0	2	2	0	2	-1	0	2	0	0	2	0	0	0	2	0	0	2	0	2	0	0	2	2	0	0	2
AM497	349070855	349155448	84593	0	2	2	2	0	2	0	2	0	-1	0	2	0	2	2	2	2	2	0	0	2	2	0	2	-1	0	2	0	0	2	0	0	0	2	0	0	2	0	2	0	0	2	2	0	0	2
AM496	349155449	349312912	157463	0	2	2	2	0	2	0	2	0	-1	0	2	0	2	2	2	2	2	0	0	2	2	0	2	-1	0	2	0	0	2	0	0	0	2	0	0	2	0	2	0	0	2	2	0	0	2
AM498	349312913	349421523	108610	0	2	2	2	0	2	0	2	0	-1	0	2	0	2	2	2	2	2	0	0	2	2	0	2	-1	0	2	0	0	2	0	0	0	2	0	0	2	0	2	0	0	2	2	0	0	2
AM499	349421524	349782852	361328	0	2	2	2	0	2	0	2	0	-1	0	2	0	2	2	2	2	0	0	0	2	2	0	2	-1	0	2	0	0	2	0	0	0	2	0	0	2	0	2	0	0	2	2	0	0	2
AM503	349782853	349817311	34458	0	2	2	2	0	2	0	2	0	-1	0	2	0	2	2	2	2	0	0	0	2	2	0	2	-1	0	2	0	0	2	0	0	0	2	0	0	2	0	2	0	0	2	2	0	0	2
AM505	349817312	349828571	11259	0	2	2	2	0	2	0	2	0	-1	0	2	0	2	2	2	2	0	0	0	2	2	0	2	-1	0	2	0	0	2	0	0	0	2	0	0	2	0	2	0	0	2	2	0	0	2
AM502	349828572	350118341	289769	0	2	2	2	0	2	0	2	0	-1	0	2	0	2	2	2	2	0	0	0	2	2	0	2	-1	0	2	0	0	2	0	0	0	2	0	0	2	0	2	0	0	2	2	0	0	2
AM504	350118342	350287187	168845	0	2	2	2	0	2	0	2	0	-1	0	2	0	2	2	2	2	0	0	0	2	2	0	2	-1	0	2	0	0	2	0	0	0	2	0	0	2	0	2	0	0	2	2	0	0	2
AM506	350287188	350826366	539178	0	2	2	2	0	2	0	2	0	-1	0	2	0	2	2	2	2	0	0	0	2	2	0	2	-1	0	2	0	0	2	0	0	0	2	0	0	2	0	2	0	0	2	2	0	0	2
AM507	350826367	350935060	108693	0	2	2	2	0	2	0	2	0	-1	0	2	0	2	2	2	2	0	0	0	2	2	0	2	-1	0	2	0	0	2	0	0	0	2	0	0	2	0	2	0	0	2	2	0	0	2
AM509	350935061	351184887	249826	0	2	2	2	0	2	0	2	0	-1	0	2	0	2	2	2	2	0	0	0	2	2	0	2	-1	0	2	0	0	2	0	0	0	2	0	0	2	0	2	0	0	2	2	0	0	2
AM511	351184888	351347391	162503	0	2	2	2	0	2	0	2	0	-1	0	2	0	2	2	2	2	0	0	0	2	2	0	2	-1	0	2	0	0	2	0	0	0	2	0	0	2	0	2	0	0	2	2	0	0	2
AM508	351347392	352525871	1178479	0	2	2	2	0	2	0	2	0	-1	0	2	0	2	2	2	2	0	0	0	2	2	0	2	-1	0	2	0	0	2	0	0	0	2	0	0	2	0	2	0	0	2	2	0	0	2
AM510	352525872	353424254	898382	0	2	2	2	0	2	0	2	0	-1	0	2	0	2	2	2	2	0	0	0	2	2	0	2	-1	0	2	0	0	2	0	0	0	2	0	0	2	0	2	0	0	2	2	0	0	2
AM512	353424255	354186597	762342	0	2	2	2	0	2	0	2	0	-1	0	2	0	2	2	2	2	0	0	0	2	2	0	2	-1	0	2	0	0	2	0	0	0	2	0	0	2	0	2	0	0	2	2	0	0	2
AM513	354186598	354872609	686011	0	2	2	2	0	2	0	2	0	-1	0	2	0	2	2	2	2	0	0	0	2	2	0	2	-1	0	2	0	0	2	0	0	0	2	0	0	2	0	2	0	0	2	2	0	0	2
AM515	354872610	355105843	233233	0	2	2	2	0	2	0	2	0	-1	0	2	0	2	2	2	2	0	0	0	2	2	0	2	-1	0	2	0	0	2	0	0	0	2	0	0	2	0	2	0	0	2	2	0	0	2
AM517	355105844	355250799	144955	0	2	2	2	0	2	0	2	0	-1	0	2	0	2	2	2	2	0	0	0	2	2	0	2	-1	0	2	0	0	2	0	0	0	2	0	0	2	0	2	0	0	2	2	0	0	2
AM500	355250800	355784516	533716	0	2	2	2	0	2	0	2	0	-1	0	2	0	2	2	2	2	0	0	0	2	2	0	2	-1	0	2	0	0	2	0	0	0	2	0	0	2	0	2	0	0	2	2	0	0	2
AM501	355784517	356571340	786823	0	2	2	2	0	2	0	2	0	-1	0	2	0	2	2	2	2	0	0	0	2	2	0	2	-1	0	2	0	0	2	0	0	0	2	0	0	2	0	2	0	0	2	2	0	0	2
AM514	356571341	356812726	241385	0	2	2	2	0	2	0	2	0	-1	0	2	0	2	2	2	2	0	0	0	2	2	0	2	-1	0	2	0	0	2	0	0	0	2	0	0	2	0	2	0	0	2	2	0	0	2
AM516	356812727	357024938	212211	0	2	2	2	0	2	0	2	0	-1	0	2	0	2	2	2	2	0	0	0	2	2	0	2	-1	0	2	0	0	2	0	0	0	2	0	0	2	0	2	0	0	2	2	0	0	2
AM518	357024939	357430587	405648	0	2	2	2	0	2	0	2	0	-1	0	2	0	2	2	2	2	0	0	0	2	2	0	2	-1	0	2	0	0	2	0	0	0	2	0	0	2	0	2	0	0	2	2	0	0	2
AM519	357430588	360876427	3445839	0	2	2	2	0	2	0	2	0	-1	0	2	0	2	2	2	2	0	0	0	2	2	0	2	-1	0	2	0	0	2	0	0	0	2	0	0	2	0	2	0	0	2	2	0	0	2
AM521	360876428	360962067	85639	0	2	2	2	0	2	0	2	0	-1	0	2	0	2	2	2	2	0	0	0	2	2	0	2	-1	0	2	0	0	2	0	0	0	2	0	0	2	0	2	0	0	2	2	0	0	2
AM520	360962068	361389249	427181	0	2	2	2	0	2	0	2	0	-1	0	2	0	2	2	2	2	0	0	0	2	2	0	2	-1	0	2	0	0	2	0	0	0	2	0	0	2	0	2	0	0	2	2	0	0	2
AM523	361389250	361851934	462684	0	2	2	2	0	2	0	2	0	-1	0	2	0	2	2	2	2	0	0	0	2	2	0	2	-1	0	2	0	0	2	0	0	0	2	0	0	2	0	2	0	0	2	2	0	0	2
AM525	361851935	361947078	95143	0	2	2	2	0	2	0	2	0	-1	0	2	0	2	2	2	2	0	0	0	2	2	0	2	-1	0	2	0	0	2	0	0	0	2	0	0	2	0	2	0	0	2	2	0	0	2
AM527	361947079	363297037	1349958	0	2	2	2	0	2	0	2	0	-1	0	2	0	2	2	2	2	0	0	0	2	2	0	2	-1	0	2	0	0	2	0	0	0	2	0	0	2	0	2	0	0	2	2	0	0	2
AM522	363297038	363436933	139895	0	2	2	2	0	2	0	2	0	-1	0	2	0	2	2	2	2	0	0	0	2	2	0	2	-1	0	2	0	0	2	0	0	0	2	0	0	2	0	2	0	0	2	2	0	0	2
AM524	363436934	364018765	581831	0	2	2	2	0	2	0	2	0	-1	0	2	0	2	2	2	2	0	0	0	2	2	0	2	-1	0	2	0	0	2	0	0	0	2	0	0	2	0	2	0	0	2	2	0	0	2
AM526	364018766	364174677	155911	0	2	2	2	0	2	0	2	0	-1	0	2	0	2	2	2	2	0	0	0	2	2	0	2	-1	0	2	0	0	2	0	0	0	2	0	0	2	0	2	0	0	2	2	0	0	2
AM528	364174678	364808849	634171	0	2	2	2	0	2	0	2	0	-1	0	2	0	2	2	2	2	0	0	0	2	2	0	2	-1	0	2	0	0	2	0	0	0	2	0	0	2	0	2	0	0	2	2	0	0	2
AM529	364808850	365062795	253945	0	2	2	2	0	2	0	2	0	-1	0	2	0	2	2	2	2	0	0	0	2	2	0	2	-1	0	2	0	0	2	0	0	0	2	0	0	2	0	2	0	0	2	2	0	0	2
AM531	365062796	365226238	163442	0	2	2	2	0	2	0	2	0	-1	0	2	0	2	2	2	2	0	0	0	2	2	0	2	-1	0	2	0	0	2	0	0	0	2	0	0	2	0	2	0	0	2	2	0	0	2
AM533	365226239	365433978	207739	0	2	2	2	0	2	0	2	0	-1	0	2	0	2	2	2	2	0	0	0	2	2	0	2	-1	0	2	0	0	2	0	0	0	2	0	0	2	0	2	0	0	2	2	0	0	2
AM535	365433979	365650088	216109	0	2	2	2	0	2	0	2	0	-1	0	2	0	2	2	2	2	0	0	0	2	2	0	2	-1	0	2	0	0	2	0	0	0	2	0	0	2	0	2	0	0	2	2	0	0	2
AM530	365650089	366248253	598164	0	2	2	2	0	2	0	2	0	-1	0	2	0	2	2	2	2	0	0	0	2	2	0	2	-1	0	2	0	0	2	0	0	0	2	0	0	2	0	2	0	0	2	2	0	0	2
AM532	366248254	366391128	142874	0	2	2	2	0	2	0	2	0	-1	0	2	0	2	2	2	2	0	0	0	2	2	0	2	-1	0	2	0	0	2	0	0	0	2	0	0	2	0	2	0	0	2	2	0	0	2
AM534	366391129	366704531	313402	0	2	2	2	0	2	0	2	0	-1	0	2	0	2	2	2	2	0	0	0	2	2	0	2	-1	0	2	0	0	2	0	0	0	2	0	0	2	0	2	0	0	2	2	0	0	2
AM536	366704532	366877689	173157	0	2	2	2	0	2	0	2	0	-1	0	2	0	2	2	2	2	0	0	0	2	2	0	2	-1	0	2	0	0	2	0	0	0	2	0	0	2	0	2	0	0	2	2	0	0	2
AM540	366877690	366933628	55938	0	2	2	2	0	2	0	2	0	-1	0	2	0	2	2	2	2	0	0	0	2	2	0	2	-1	0	2	0	0	2	0	0	0	2	0	0	2	0	2	0	0	2	2	0	0	2
AM542	366933629	366997852	64223	0	2	2	2	0	2	0	2	0	-1	0	2	0	2	2	2	2	0	0	0	2	2	0	2	-1	0	2	0	0	2	0	0	0	2	0	0	2	0	2	0	0	2	2	0	0	2
AM537	366997853	367417198	419345	0	2	2	2	0	2	0	2	0	-1	0	2	0	2	2	2	2	0	0	0	2	2	0	2	-1	0	2	0	0	2	0	0	0	2	0	0	2	0	2	0	0	2	2	0	0	2
AM538	367417199	367605950	188751	0	2	2	2	0	2	0	2	0	-1	0	2	0	2	2	2	2	0	0	0	2	2	0	2	-1	0	2	0	0	2	0	0	0	2	0	0	2	0	2	0	0	2	2	0	0	2
AM539	367605951	368001189	395238	0	2	2	2	0	2	0	2	0	-1	0	2	0	2	2	2	2	0	0	0	2	2	0	2	-1	0	2	0	0	2	0	0	0	2	0	0	2	0	2	0	0	2	2	0	0	2
AM541	368001190	368088752	87562	0	2	2	2	0	2	0	2	0	-1	0	2	0	2	2	2	2	0	0	0	2	2	0	2	-1	0	2	0	0	2	0	0	0	2	0	0	2	0	2	0	0	2	2	0	0	2
AM543	368088753	368430569	341816	0	2	2	2	0	2	0	2	0	-1	0	2	0	2	2	2	2	0	0	0	2	2	0	2	-1	0	2	0	0	2	0	0	0	2	0	0	2	0	2	0	0	2	2	0	0	2
AM545	368430570	368551723	121153	0	2	2	2	0	2	0	2	0	-1	0	2	0	2	2	2	2	0	0	0	2	2	0	2	-1	0	2	0	0	2	0	0	0	2	0	0	2	0	2	0	0	2	2	0	0	2
AM544	368551724	368765777	214053	0	2	2	2	0	2	0	2	0	-1	0	2	0	2	2	2	2	0	0	0	2	2	0	2	-1	0	2	0	0	2	0	0	0	2	0	0	2	0	2	0	0	2	2	0	0	2
AM546	368765778	368863475	97697	0	2	2	2	0	2	0	2	0	-1	0	2	0	2	2	2	2	0	0	0	2	2	0	2	-1	0	2	0	0	2	0	0	0	2	0	0	2	0	2	0	0	2	2	0	0	2
AM548	368863476	369177147	313671	0	2	2	2	0	2	0	2	0	-1	0	2	0	2	2	2	2	0	0	0	2	2	0	2	-1	0	0	0	0	2	0	0	0	2	0	0	2	0	2	0	0	2	2	0	0	2
AM550	369177148	369438675	261527	0	2	2	2	0	2	0	2	0	-1	0	2	0	2	2	2	2	0	0	0	2	2	0	2	-1	0	0	0	0	2	0	0	0	2	0	0	2	0	2	0	0	2	2	0	0	2
AM547	369438676	369535985	97309	0	2	2	2	0	2	0	2	0	-1	0	2	0	2	2	2	2	0	0	0	2	2	0	2	-1	0	0	0	0	2	0	0	0	2	0	0	2	0	2	0	0	2	2	0	0	2
AM549	369535986	369679847	143861	0	2	2	2	0	2	0	2	0	-1	0	2	0	2	2	2	2	0	0	0	2	2	0	2	-1	0	0	0	0	2	0	0	0	2	0	0	2	0	2	0	0	2	2	0	0	2
AM551	369679848	369714114	34266	0	2	2	2	0	2	0	2	0	-1	0	2	0	2	2	2	2	0	0	0	2	2	0	2	-1	0	0	0	0	2	0	0	0	2	0	0	2	0	2	0	0	2	2	0	0	2
AM552	369714115	369720063	5948	0	2	2	2	0	2	0	2	0	-1	0	2	0	2	2	2	2	0	0	0	2	2	0	2	-1	0	-1	0	0	2	0	0	0	2	0	0	2	0	2	0	0	2	2	0	0	2
AM553	369720064	369791506	71442	0	2	2	2	0	2	0	2	0	-1	0	2	0	2	2	2	2	0	0	0	2	2	0	2	-1	0	-1	0	0	2	0	0	0	2	0	0	2	0	2	0	0	2	2	0	0	2
AM554	369791507	370136908	345401	0	2	2	2	0	2	0	2	0	-1	0	2	0	2	2	2	2	0	0	0	2	2	0	2	-1	0	-1	0	0	2	0	0	0	2	0	0	2	0	2	0	0	2	2	0	-1	2
AM556	370136909	370163933	27024	0	2	2	2	0	2	0	2	0	-1	0	2	0	2	2	2	2	0	0	0	2	2	0	2	-1	0	-1	0	0	2	0	0	0	2	0	0	2	0	2	0	0	2	2	0	-1	2
AM555	370163934	370444933	280999	0	2	2	2	0	2	0	2	0	-1	0	2	0	2	2	2	2	0	0	0	2	2	0	2	-1	0	0	0	0	2	0	0	0	2	0	0	2	0	2	0	0	2	2	0	-1	2
AM558	370444934	370480546	35612	0	2	2	2	0	2	0	2	0	-1	0	2	0	2	2	2	2	0	0	0	2	2	0	2	-1	0	0	0	0	2	0	0	0	2	0	0	2	0	2	0	0	2	2	0	-1	2
AM559	370480547	370701680	221133	0	2	2	2	0	2	0	2	0	-1	0	2	0	2	2	2	2	0	0	0	2	2	0	2	-1	0	2	0	0	2	0	0	0	2	0	0	2	0	2	0	0	2	2	0	-1	2
AM560	370701681	370769578	67897	0	2	2	2	0	2	0	2	0	-1	0	2	0	2	2	2	2	0	0	0	2	2	0	2	-1	0	2	0	0	2	0	0	0	2	0	0	2	0	2	0	0	2	2	0	-1	2
AM557	370769579	370980059	210480	0	2	2	2	0	2	0	2	0	-1	0	2	0	2	2	2	2	0	0	0	2	2	0	2	-1	0	2	0	0	2	0	0	0	2	0	0	2	0	2	0	0	2	2	0	-1	2
AM561	370980060	372387443	1407383	0	2	2	2	0	2	0	2	0	-1	0	2	0	2	2	2	2	0	0	0	2	2	0	2	-1	0	0	0	0	2	0	0	0	2	0	0	2	0	2	0	0	2	2	0	-1	2
AM563	372387444	372512366	124922	0	2	2	2	0	2	0	2	0	-1	0	2	0	2	2	2	2	0	0	0	2	2	0	2	-1	0	0	0	0	2	0	0	0	2	0	0	2	0	2	0	0	2	2	0	-1	2
AM565	372512367	372598888	86521	0	2	2	2	0	2	0	2	0	-1	0	2	0	2	2	2	2	0	0	0	2	2	0	2	-1	0	0	0	0	2	0	0	0	2	0	0	2	0	2	0	0	2	2	0	0	2
AM562	372598889	373906332	1307443	0	2	2	2	0	2	0	2	0	-1	0	2	0	2	2	2	2	0	0	0	2	2	0	2	-1	0	0	0	0	2	0	0	0	2	0	0	2	0	2	0	0	2	2	0	-1	2
AM564	373906333	374014531	108198	0	2	2	2	0	2	0	2	0	-1	0	2	0	2	2	2	2	0	0	0	2	2	0	2	-1	0	0	0	0	2	0	0	0	2	0	0	2	0	2	0	0	2	2	0	0	2
AM566	374014532	374818863	804331	0	2	2	2	0	2	0	2	0	-1	0	2	0	2	2	2	2	0	0	0	2	2	0	2	-1	0	0	0	0	2	0	0	0	2	0	0	2	0	2	0	0	2	2	0	-1	2
AM567	374818864	375317957	499093	0	2	2	2	0	2	0	2	0	-1	0	2	0	2	2	2	2	0	0	0	2	2	0	2	-1	0	0	0	0	2	0	0	0	2	0	0	2	0	2	0	0	2	2	0	-1	2
AM568	375317958	376928038	1610080	0	2	2	2	0	2	0	2	0	-1	0	2	0	2	2	2	2	0	0	0	2	2	0	2	-1	0	0	0	0	2	0	0	0	2	0	0	2	0	2	0	0	2	2	0	-1	2
AM569	376928039	378474193	1546154	0	2	2	2	0	2	0	2	0	-1	0	2	0	2	2	2	2	0	0	0	2	2	0	2	-1	0	0	0	0	2	0	0	0	2	0	0	2	0	2	0	0	2	2	0	-1	2
AM570	378474194	378809644	335450	0	2	2	2	0	2	0	2	0	-1	0	2	0	2	2	2	2	0	0	0	2	2	0	2	-1	0	0	0	0	2	0	0	0	2	0	0	2	0	2	0	0	2	2	0	-1	2
AM571	378809645	379220481	410836	0	2	2	2	0	2	0	2	0	-1	0	2	0	2	2	2	2	0	0	0	2	2	0	2	-1	0	0	0	0	2	0	0	0	2	0	0	2	0	2	0	0	2	2	0	-1	2
AM572	379220482	381117494	1897012	0	2	2	2	0	2	0	2	0	-1	0	2	0	2	2	2	2	0	0	0	2	2	0	2	-1	0	0	0	0	2	0	0	0	2	0	0	2	0	2	0	0	2	2	0	-1	2
AM573	381117495	381126077	8582	0	2	2	2	0	2	0	2	0	-1	0	2	0	2	2	2	2	0	0	0	2	2	0	2	-1	0	0	0	0	2	0	0	0	2	0	0	2	0	2	0	0	2	2	0	-1	2
AM574	381126078	381248973	122895	0	2	2	2	0	2	0	2	0	-1	0	2	0	2	2	2	-1	0	0	0	2	2	0	2	-1	0	0	0	0	2	0	0	0	2	0	0	2	0	2	0	0	2	2	0	-1	2
AM576	381248974	381409634	160660	0	2	2	2	0	2	0	2	0	-1	0	2	0	2	2	2	-1	0	0	0	2	2	0	2	-1	0	0	0	0	2	0	0	0	2	0	0	2	0	2	0	0	2	2	0	-1	2
AM575	381409635	381715610	305975	0	2	2	2	0	2	0	2	0	-1	0	2	0	2	2	2	-1	0	0	0	2	2	0	2	-1	0	0	0	0	2	0	0	0	2	0	0	2	0	2	0	0	2	2	0	-1	2
AM578	381715611	381757067	41456	0	2	2	2	0	2	0	2	0	-1	0	2	0	2	2	2	-1	0	0	0	2	2	0	2	-1	0	0	0	0	2	0	0	0	2	0	0	2	0	2	0	0	2	2	0	-1	2
AM580	381757068	382133615	376547	0	2	2	2	0	2	0	2	0	-1	0	2	0	2	2	2	-1	0	0	0	2	2	0	2	-1	0	0	0	0	2	0	0	0	2	0	0	2	0	2	0	0	2	2	0	-1	2
AM577	382133616	382812619	679003	0	2	2	2	0	2	0	2	0	-1	0	2	0	2	2	2	-1	0	0	0	2	2	0	2	-1	0	0	0	0	2	0	0	0	2	0	0	2	0	2	0	0	2	2	0	-1	2
AM579	382812620	383330139	517519	0	2	2	2	0	2	0	2	0	-1	0	2	0	2	2	2	-1	0	0	0	2	2	0	2	-1	0	0	0	0	2	0	0	0	2	0	0	2	0	2	0	0	2	2	0	-1	2
AM581	383330140	383388485	58345	0	2	2	2	0	2	0	2	0	-1	0	2	0	2	2	2	-1	0	0	0	2	2	0	2	-1	0	0	0	0	2	0	0	0	2	0	0	2	0	2	0	0	2	2	0	-1	2
AM582	383388486	383396525	8039	0	2	2	2	0	2	0	2	0	-1	0	2	0	2	2	2	-1	0	0	0	2	2	0	2	-1	0	0	0	0	2	0	0	0	2	0	0	2	0	2	0	0	2	2	0	-1	2
AM583	383396526	383423588	27062	0	2	2	2	0	2	0	2	0	-1	0	2	0	2	2	2	-1	0	0	0	2	2	0	2	-1	0	0	0	0	2	0	0	0	2	0	0	2	0	2	0	2	2	2	0	-1	2
AM584	383423589	383772537	348948	0	2	2	2	0	2	0	2	0	-1	0	2	0	2	2	2	-1	0	0	0	2	2	0	2	-1	0	0	0	0	2	0	0	0	2	0	0	2	0	2	0	2	2	2	0	-1	2
AM585	383772538	383818578	46040	0	2	2	2	0	2	0	2	0	-1	0	2	0	2	2	2	-1	0	0	0	2	2	0	2	-1	0	0	0	0	2	0	0	0	2	0	0	2	0	2	0	2	2	2	0	-1	2
AM586	383818579	384382913	564334	0	2	2	2	0	2	0	2	0	-1	0	2	0	2	2	2	-1	0	0	0	2	2	0	2	-1	0	0	0	0	2	0	0	0	2	0	0	2	0	2	0	2	2	2	0	-1	2
AM587	384382914	385364559	981645	0	2	2	2	0	2	0	2	0	-1	0	2	0	2	2	2	-1	0	0	0	2	2	0	2	-1	0	0	0	0	2	0	0	0	2	0	0	2	0	2	0	2	2	2	0	-1	2
AM589	385364560	385493088	128528	0	2	2	2	0	2	0	2	0	-1	0	2	0	2	2	2	-1	0	0	0	2	2	0	2	-1	0	0	0	0	2	0	0	0	2	0	0	2	0	2	0	2	2	2	0	0	2
AM591	385493089	385643336	150247	0	2	2	2	0	2	0	2	0	-1	0	2	0	2	2	2	-1	0	0	0	2	2	0	2	-1	0	0	0	0	2	0	0	0	2	0	0	2	0	2	0	2	2	2	0	-1	2
AM590	385643337	385781811	138474	0	2	2	2	0	2	0	2	0	-1	0	2	0	2	2	2	-1	0	0	0	2	2	0	2	-1	0	0	0	0	2	0	0	0	2	0	0	2	0	2	0	2	2	2	0	-1	2
AM593	385781812	385960376	178564	0	2	2	2	0	2	0	2	0	-1	0	2	0	2	2	2	-1	0	0	0	2	2	0	2	-1	0	0	0	0	2	0	0	0	2	0	0	2	0	2	0	2	2	2	0	-1	2
AM588	385960377	385971161	10784	0	2	2	2	0	2	0	2	0	-1	0	2	0	2	2	2	-1	0	0	0	2	2	0	2	-1	0	0	0	0	2	0	0	0	2	0	0	2	0	2	0	2	2	2	0	0	2
AM592	385971162	386026850	55688	0	2	2	2	0	2	0	2	0	-1	0	2	0	2	2	2	-1	0	0	0	2	2	0	2	-1	0	0	0	0	2	0	0	0	2	0	0	2	0	2	0	2	2	2	0	0	2
AM594	386026851	386043461	16610	0	2	2	2	0	2	0	2	0	-1	0	2	0	2	2	2	-1	0	0	0	2	2	0	2	-1	0	0	0	0	2	0	0	0	2	0	0	2	0	2	0	2	2	2	0	0	2
AM598	386043462	386189992	146530	0	2	2	2	0	2	0	2	0	-1	0	2	0	2	2	2	-1	0	0	0	2	2	0	2	-1	0	0	0	0	2	0	0	0	2	0	0	2	0	2	0	2	2	2	0	-1	2
AM600	386189993	386475831	285838	0	2	2	2	0	2	0	2	0	-1	0	2	0	2	2	2	-1	0	0	0	2	2	0	2	-1	0	0	0	0	2	0	0	0	2	0	0	2	0	2	0	2	2	2	0	-1	2
AM595	386475832	386514406	38574	0	2	2	2	0	2	0	2	0	-1	0	2	0	2	2	2	-1	0	0	0	2	2	0	2	-1	0	0	0	0	2	0	0	0	2	0	0	2	0	2	0	2	2	2	0	0	2
AM599	386514407	386634112	119705	0	2	2	2	0	2	0	2	0	-1	0	2	0	2	2	2	-1	0	0	0	2	2	0	2	-1	0	0	0	0	2	0	0	0	2	0	0	2	0	2	0	2	2	2	0	0	2
AM596	386634113	387008925	374812	0	2	2	2	0	2	0	2	0	-1	0	2	0	2	2	2	-1	0	0	0	2	2	0	2	-1	0	0	0	0	2	0	0	0	2	0	0	2	0	2	0	2	2	2	0	-1	2
AM597	387008926	387286162	277236	0	2	2	2	0	2	0	2	0	-1	0	2	0	2	2	2	-1	0	0	0	2	2	0	2	-1	0	0	0	0	2	0	0	0	2	0	0	2	0	2	0	2	2	2	0	0	2
AM601	387286163	387340032	53869	0	2	2	2	0	2	0	2	0	-1	0	2	0	2	2	2	-1	0	0	0	2	2	0	2	-1	0	0	0	0	2	0	0	0	2	0	0	2	0	2	2	2	2	2	0	0	2
AM602	387340033	387826640	486607	0	2	2	2	0	2	0	2	0	-1	0	2	0	2	2	2	-1	0	0	0	2	2	0	2	-1	0	0	0	0	2	0	0	0	2	0	0	2	0	2	2	2	2	2	0	-1	2
AM603	387826641	387936509	109868	0	2	2	2	0	2	0	2	0	-1	0	2	0	2	2	2	-1	0	0	0	2	2	0	2	-1	0	0	0	0	2	0	0	0	2	0	0	2	0	2	2	2	2	2	0	-1	2
AM604	387936510	388077823	141313	0	2	2	2	0	2	0	2	0	-1	0	2	0	2	2	2	-1	0	0	0	2	2	0	2	-1	0	0	0	0	2	0	0	0	2	0	0	2	0	2	2	2	2	2	0	-1	2
AM606	388077824	388216936	139112	0	2	2	2	0	2	0	2	0	-1	0	2	0	2	2	2	-1	0	0	0	2	2	0	2	-1	0	0	0	0	2	0	0	0	2	0	0	2	0	2	2	2	2	2	0	-1	2
AM608	388216937	388324482	107545	0	2	2	2	0	2	0	2	0	-1	0	2	0	2	2	2	-1	0	0	0	2	2	0	2	-1	0	0	0	0	2	0	0	0	2	0	0	2	0	2	2	2	2	2	0	-1	2
AM605	388324483	388872391	547908	0	2	2	2	0	2	0	2	0	-1	0	2	0	2	2	2	-1	0	0	0	2	2	0	2	-1	0	0	0	0	2	0	0	0	2	0	0	2	0	2	2	2	2	2	0	-1	2
AM607	388872392	391131721	2259329	0	2	2	2	0	2	0	2	0	-1	0	2	0	2	2	2	-1	0	0	0	2	2	0	2	-1	0	0	0	0	2	0	0	0	2	0	0	2	0	2	2	2	2	2	0	-1	2
AM609	391131722	391256421	124699	0	2	2	2	0	2	0	2	0	-1	0	2	0	2	2	2	-1	0	0	0	2	2	0	2	-1	0	0	0	0	2	0	0	0	2	0	0	2	0	2	2	2	2	2	0	-1	2
AM611	391256422	391574620	318198	0	2	2	2	0	2	0	2	0	-1	0	2	0	2	2	2	-1	0	0	0	2	2	0	2	-1	0	0	0	0	2	0	0	0	2	0	0	2	0	2	2	2	2	2	0	-1	2
AM615	391574621	391657036	82415	0	2	2	2	0	2	0	2	0	-1	0	2	0	2	2	2	-1	0	0	0	2	2	0	2	-1	0	0	0	0	2	0	0	0	2	0	0	2	0	2	2	2	2	2	0	-1	2
AM610	391657037	391852357	195320	0	2	2	2	0	2	0	2	0	-1	0	2	0	2	2	2	-1	0	0	0	2	2	0	2	-1	0	0	0	0	2	0	0	0	2	0	0	2	0	2	2	2	2	2	0	-1	2
AM612	391852358	391891174	38816	0	2	2	2	0	2	0	2	0	-1	0	2	0	2	2	2	-1	0	0	0	2	2	0	2	-1	0	0	0	0	2	0	0	0	2	0	0	2	0	2	2	2	2	2	0	-1	2
AM618	391891175	391905888	14713	0	2	2	2	0	2	0	2	0	-1	0	2	0	2	2	2	-1	0	0	0	2	2	0	2	-1	0	0	0	0	2	0	0	0	2	0	0	2	0	2	2	2	2	2	0	-1	2
AM613	391905889	392031308	125419	0	2	2	2	0	2	0	2	0	-1	0	2	0	2	2	2	-1	0	0	0	2	2	0	2	-1	0	0	0	0	2	0	0	0	2	0	0	2	0	2	2	2	2	2	0	-1	2
AM614	392031309	392106320	75011	0	2	2	2	0	2	0	2	0	-1	0	2	0	2	2	2	-1	0	0	0	2	2	0	2	-1	0	0	0	0	2	0	0	0	2	0	0	2	0	2	2	2	2	2	0	-1	2
AM616	392106321	392270408	164087	0	2	2	2	0	2	0	2	0	-1	0	2	0	2	2	2	-1	0	0	0	2	2	0	2	-1	0	0	0	0	2	0	0	0	2	0	0	2	0	2	2	2	2	2	0	-1	2
AM617	392270409	393113075	842666	0	2	2	2	0	2	0	2	0	-1	0	2	0	2	2	2	-1	0	0	0	2	2	0	2	-1	0	0	0	0	2	0	0	0	2	0	0	2	0	2	2	2	2	2	0	-1	2
AM619	393113076	393226158	113082	0	2	2	2	0	2	0	2	0	-1	0	2	0	2	2	2	-1	0	0	0	2	2	0	2	-1	0	0	0	0	2	0	0	0	2	0	0	2	0	2	2	2	2	2	0	-1	2
AM621	393226159	393380289	154130	0	2	2	2	0	2	0	2	0	-1	0	2	0	2	2	2	-1	0	0	0	2	2	0	2	-1	0	0	0	0	2	0	0	0	2	0	0	2	0	2	2	2	2	2	0	-1	2
AM620	393380290	393594800	214510	0	2	2	2	0	2	0	2	0	-1	0	2	0	2	2	2	-1	0	0	0	2	2	0	2	-1	0	0	0	0	2	0	0	0	2	0	0	2	0	2	2	2	2	2	0	-1	2
AM622	393594801	394011841	417040	0	2	2	2	0	2	0	2	0	-1	0	2	0	2	2	2	-1	0	0	0	2	2	0	2	-1	0	0	0	0	2	0	0	0	2	0	0	2	0	2	2	2	2	2	0	-1	2
AM623	394011842	394019051	7209	0	2	2	2	0	2	0	2	0	-1	0	2	0	2	2	2	2	0	0	0	2	2	0	2	-1	0	0	0	0	2	0	0	0	2	0	0	2	0	2	2	2	2	2	0	-1	2
AM624	394019052	394212300	193248	0	2	2	2	0	2	0	2	0	-1	0	2	0	2	2	2	2	0	0	0	2	2	0	2	-1	0	-1	0	0	2	0	0	0	2	0	0	2	0	2	2	2	2	2	0	-1	2
AM625	394212301	394347657	135356	0	2	2	2	0	2	0	2	0	-1	0	2	0	2	2	2	2	0	0	0	2	2	0	2	-1	0	-1	0	0	2	0	0	0	2	0	0	2	0	2	2	2	2	2	0	-1	2
AM626	394347658	394413389	65731	0	2	2	2	0	2	0	2	0	-1	0	2	0	2	2	2	-1	0	0	0	2	2	0	2	-1	0	0	0	0	2	0	0	0	2	0	0	2	0	2	2	2	2	2	0	-1	2
AM627	394413390	394570247	156857	0	2	2	2	0	2	0	2	0	-1	0	2	0	2	2	2	-1	0	0	0	2	2	0	2	-1	0	0	0	0	2	0	0	0	2	0	0	2	0	2	2	2	2	2	0	-1	2
AM628	394570248	394610678	40430	0	2	2	2	0	2	0	2	0	-1	0	2	0	2	2	2	-1	0	0	0	2	2	0	2	-1	0	0	0	0	2	0	0	0	2	0	0	2	2	2	2	2	2	2	0	-1	2
AM629	394610679	395868646	1257967	0	2	2	2	0	2	0	2	0	-1	0	2	0	2	2	2	-1	0	0	0	2	2	0	2	-1	0	0	0	0	2	0	0	0	2	0	0	2	2	2	2	2	2	2	0	-1	2
AM630	395868647	395973767	105120	0	2	2	2	0	2	0	2	0	2	0	2	0	2	2	2	-1	0	0	0	2	2	0	2	-1	0	0	0	0	2	0	0	0	2	0	0	2	2	2	2	2	2	2	0	-1	2
AM631	395973768	396519401	545633	0	2	2	2	0	2	0	2	0	2	0	2	0	2	2	2	-1	0	0	0	2	2	0	2	-1	0	0	0	0	2	0	0	0	2	0	0	2	2	2	2	2	2	2	0	-1	2
AM633	396519402	396596178	76776	0	2	2	2	0	2	0	2	0	2	0	2	0	2	2	2	-1	0	0	0	2	2	0	2	-1	0	0	0	0	2	0	0	0	2	0	0	2	2	2	2	2	2	2	0	-1	2
AM632	396596179	396651594	55415	0	2	2	2	0	2	0	2	0	2	0	2	0	2	2	2	-1	0	0	0	2	2	0	2	-1	0	0	0	0	2	0	0	0	2	0	0	2	2	2	2	2	2	2	0	-1	2
AM634	396651595	396875486	223891	0	2	2	2	0	2	0	2	0	2	0	2	0	2	2	2	-1	0	0	0	2	2	0	2	-1	0	0	0	0	2	0	0	0	2	0	0	2	2	2	2	2	2	2	0	-1	2
AM635	396875487	397093588	218101	0	2	2	2	0	2	0	2	0	2	0	2	0	2	2	2	-1	0	0	0	2	2	0	2	-1	0	0	0	0	2	0	0	0	2	0	0	2	2	2	2	2	2	2	0	-1	2
AM637	397093589	397250848	157259	0	2	2	2	0	2	0	2	0	2	0	2	0	2	2	2	-1	0	0	0	2	2	0	2	-1	0	0	0	0	2	0	0	0	2	0	0	2	2	2	2	2	2	2	0	-1	2
AM636	397250849	397327348	76499	0	2	2	2	0	2	0	2	0	2	0	2	0	2	2	2	-1	0	0	0	2	2	0	2	-1	0	0	0	0	2	0	0	0	2	0	0	2	2	2	2	2	2	2	0	-1	2
AM640	397327349	397494081	166732	0	2	2	2	0	2	0	2	0	2	0	2	0	2	2	0	-1	0	0	0	2	2	0	2	-1	0	0	0	0	2	0	0	0	2	0	0	2	2	2	2	2	2	2	0	-1	2
AM639	397494082	397506026	11944	0	2	2	2	0	2	0	2	0	2	0	2	0	2	2	0	-1	0	0	0	2	2	0	2	-1	0	0	0	0	2	0	0	0	2	0	0	2	2	2	2	2	2	2	0	-1	2
AM638	397506027	397680777	174750	0	2	2	2	0	2	0	2	0	2	0	2	0	2	2	0	-1	0	0	0	2	2	0	2	-1	0	0	0	0	2	0	0	0	2	0	0	2	2	2	2	2	2	2	0	-1	2
AM642	397680778	397690394	9616	0	2	2	2	0	2	0	2	0	2	0	2	0	2	2	0	-1	0	0	0	2	2	0	2	-1	0	0	0	0	2	0	0	0	2	0	0	2	2	2	2	2	2	2	0	-1	2
AM641	397690395	397928910	238515	0	2	2	2	0	2	0	2	0	2	0	2	0	2	2	0	-1	0	0	0	2	2	0	2	-1	0	0	0	0	2	0	0	0	2	0	0	2	2	2	2	2	2	2	0	-1	2
AM643	397928911	398824865	895954	0	2	2	2	0	2	0	2	0	2	0	2	0	2	2	0	-1	0	0	0	2	2	0	2	-1	0	0	0	0	2	0	0	0	2	0	0	2	2	2	2	2	2	2	0	-1	2
AM644	398824866	402464605	3639739	0	2	2	2	0	2	0	2	0	2	0	2	0	2	2	0	-1	0	0	0	2	2	0	2	-1	0	0	0	0	2	0	0	0	2	0	0	2	2	2	2	2	2	2	0	-1	2
AM645	402464606	402853077	388471	0	2	2	2	0	2	0	2	0	2	0	2	0	2	2	0	-1	0	0	0	2	2	0	2	-1	0	0	0	0	2	0	0	0	2	0	0	2	2	2	2	2	2	2	0	-1	2
AM646	402853078	402858760	5682	0	2	2	2	0	2	0	2	0	2	0	2	0	2	2	0	-1	0	0	0	2	2	0	2	-1	0	0	0	0	2	0	0	0	2	0	0	2	2	2	2	2	2	2	0	-1	2
AM647	402858761	402865083	6322	0	2	2	2	0	2	0	2	0	2	0	2	0	2	2	0	-1	0	0	0	2	2	0	2	-1	0	0	0	0	2	0	0	0	2	0	0	2	2	2	2	2	2	2	0	-1	2
AM648	402865084	403077768	212684	0	2	2	2	0	2	0	2	0	2	0	2	0	2	2	0	-1	0	0	0	2	2	0	2	-1	0	0	0	0	2	0	0	0	2	0	0	2	2	2	2	2	2	2	0	-1	2
AM650	403077769	403140008	62239	0	2	2	2	0	2	0	2	0	2	0	2	0	2	2	0	-1	0	0	0	2	2	0	2	-1	0	2	0	0	2	0	0	0	2	0	0	2	2	2	2	2	2	2	0	-1	2
AM649	403140009	403272309	132300	0	2	2	2	0	2	0	2	0	2	0	2	0	2	2	0	-1	0	0	0	2	2	0	2	-1	0	2	0	0	2	0	0	0	2	0	0	2	2	2	2	2	2	2	0	-1	2
AM651	403272310	403462153	189843	0	2	2	2	0	2	0	2	0	2	0	2	0	2	2	0	-1	0	0	0	2	2	0	2	-1	0	2	0	0	2	0	0	0	2	0	0	2	2	2	2	2	2	2	0	-1	2
AM653	403462154	403527202	65048	0	2	2	2	0	2	0	2	0	2	0	2	0	2	2	0	-1	0	0	0	2	2	0	2	-1	0	2	0	0	2	0	0	0	2	0	0	2	2	2	2	2	2	2	0	-1	2
AM656	403527203	403618977	91774	0	2	2	2	0	2	0	2	0	2	0	2	0	2	2	0	-1	0	0	0	2	2	0	2	-1	0	2	0	0	2	0	0	0	2	0	0	2	2	2	2	2	2	2	0	-1	2
AM654	403618978	403677785	58807	0	2	2	2	0	2	0	2	0	2	0	2	0	2	2	0	-1	0	0	0	2	2	0	2	-1	0	2	0	0	2	0	0	0	2	0	0	2	2	2	2	2	2	2	0	-1	2
AM655	403677786	403968569	290783	0	2	2	2	0	2	0	2	0	2	0	2	0	2	2	0	-1	0	0	0	2	2	0	2	-1	0	2	0	0	2	0	0	0	2	0	0	2	2	2	2	2	2	2	0	-1	2
AM652	403968570	404223476	254906	0	2	2	2	0	2	0	2	0	2	0	2	0	2	2	0	-1	0	0	0	2	2	0	2	-1	0	2	0	0	2	0	0	0	2	0	0	2	2	2	2	2	2	2	0	-1	2
AM657	404223477	404276850	53373	0	2	2	2	0	2	0	2	0	2	0	2	0	2	2	0	-1	0	0	0	2	2	0	2	-1	0	2	0	0	2	0	0	0	2	0	0	2	2	2	2	2	2	2	0	-1	2
AM658	404276851	404323569	46718	0	2	2	2	0	2	0	2	0	2	0	2	0	2	2	0	-1	0	0	0	2	2	0	2	-1	0	-1	0	0	2	0	0	0	2	0	0	2	2	2	2	2	2	2	0	-1	2
AM659	404323570	404982902	659332	0	2	2	2	0	2	0	2	0	2	0	2	0	2	2	0	-1	0	0	0	2	2	0	2	-1	0	-1	0	0	2	0	0	0	2	0	0	2	2	2	2	2	2	2	0	-1	2
AM660	404982903	405376829	393926	0	2	2	2	0	2	0	2	0	2	0	2	0	2	2	0	-1	0	0	0	2	2	0	2	-1	0	-1	0	0	2	0	0	0	2	0	0	2	2	2	2	2	2	2	0	-1	2
AM661	405376830	405589894	213064	0	2	2	2	0	2	0	2	0	2	0	2	0	2	2	0	-1	0	0	0	2	2	0	2	-1	0	-1	0	0	2	0	0	0	2	0	0	2	2	2	2	2	2	2	0	-1	2
AM662	405589895	405964904	375009	0	2	2	2	0	2	0	2	0	2	0	2	0	2	2	0	-1	0	0	0	2	2	0	2	-1	0	-1	0	0	2	0	0	0	2	0	0	2	2	2	2	2	2	2	0	-1	2
AM663	405964905	405972861	7956	0	2	2	2	0	2	0	2	0	2	0	2	0	2	2	0	-1	0	0	0	2	2	0	2	-1	0	0	0	0	2	0	0	0	2	0	0	2	2	2	2	2	2	2	0	-1	2
AM665	405972862	406053011	80149	0	2	2	2	0	2	0	2	0	2	0	2	0	2	2	0	-1	0	0	0	2	2	0	2	-1	0	0	0	0	2	0	0	0	2	0	0	2	2	2	2	2	2	2	0	-1	2
AM664	406053012	406104222	51210	0	2	2	2	0	2	0	2	0	2	0	2	0	2	2	0	-1	0	0	0	2	2	0	2	-1	0	0	0	0	2	0	0	0	2	0	0	2	2	2	2	2	2	2	0	-1	2
AM666	406104223	406257609	153386	0	2	2	2	0	2	0	2	0	2	0	2	0	2	2	0	-1	0	0	0	2	2	0	2	-1	0	0	0	0	2	0	0	0	2	0	0	2	2	2	2	2	2	2	0	-1	2
AM667	406257610	406276503	18893	0	2	2	2	0	2	0	2	0	2	0	2	0	2	2	0	-1	0	0	0	2	2	0	2	-1	0	0	0	0	2	0	0	0	2	0	0	2	2	2	2	2	2	2	0	-1	2
AM668	406276504	406310245	33741	0	2	2	2	0	2	0	2	0	2	0	2	0	2	2	0	-1	0	0	0	2	2	0	2	-1	0	-1	0	0	2	0	0	0	2	0	0	2	2	2	2	2	2	2	0	-1	2
AM671	406310246	406340684	30438	0	2	2	2	0	2	0	2	0	2	0	2	0	2	2	0	-1	0	0	0	2	2	0	2	-1	0	-1	0	0	2	0	0	0	2	0	0	2	2	2	2	2	2	2	0	-1	2
AM670	406340685	406568461	227776	0	2	2	2	0	2	0	2	0	2	0	2	0	2	2	0	-1	0	0	0	2	2	0	2	-1	0	-1	0	0	2	0	0	0	2	0	0	2	2	2	2	2	2	2	0	-1	2
AM669	406568462	406599757	31295	0	2	2	2	0	2	0	2	0	2	0	2	0	2	2	0	-1	0	0	0	2	2	0	2	-1	0	2	0	0	2	0	0	0	2	0	0	2	2	2	2	2	2	2	0	-1	2
AM672	406599758	407377498	777740	0	2	2	2	0	2	0	2	0	2	0	2	0	2	2	0	-1	0	0	0	2	2	0	2	-1	0	2	0	0	2	0	0	0	2	0	0	2	2	2	2	2	2	2	0	-1	2
AM674	407377499	407408398	30899	0	2	2	2	0	2	0	2	0	2	0	2	0	2	2	0	-1	0	0	0	2	2	0	2	-1	0	2	0	0	2	0	0	0	2	0	0	2	2	2	2	2	2	2	0	-1	2
AM673	407408399	407501434	93035	0	2	2	2	0	2	0	2	0	2	0	2	0	2	2	0	-1	0	0	0	2	2	0	2	-1	0	2	0	0	2	0	0	0	2	0	0	2	2	2	2	2	2	2	0	-1	2
AM675	407501435	407799274	297839	0	2	2	2	0	2	0	2	0	2	0	2	0	2	2	0	-1	0	0	0	2	2	0	2	-1	0	2	0	0	2	0	0	0	2	0	0	2	2	2	2	2	2	2	0	-1	2
AM676	407799275	408025383	226108	0	2	2	2	0	2	0	2	0	2	0	2	0	2	2	0	-1	0	0	0	2	2	0	2	-1	0	2	0	0	2	0	0	0	2	0	0	2	2	2	2	2	2	2	0	-1	2
AM677	408025384	408095214	69830	0	2	2	2	0	2	0	2	0	2	0	2	0	2	2	0	-1	0	0	0	2	2	0	2	-1	0	2	0	0	2	0	0	0	2	0	0	2	2	2	2	2	2	2	0	-1	2
AM678	408095215	408440643	345428	0	2	2	2	0	2	0	2	0	2	0	2	0	2	2	0	-1	0	0	0	2	2	0	2	-1	0	2	0	0	2	0	0	0	2	0	0	2	2	2	2	2	2	2	0	-1	2
AM680	408440644	408642544	201900	0	2	2	2	0	2	0	2	0	2	0	2	0	2	2	0	-1	0	0	0	2	2	0	2	-1	0	2	0	0	2	0	0	0	2	0	0	2	2	2	2	2	2	2	0	-1	2
AM679	408642545	408774406	131861	0	2	2	2	0	2	0	2	0	2	0	2	0	2	2	0	-1	0	0	0	2	2	0	2	-1	0	2	0	0	2	0	0	0	2	0	0	2	2	2	2	2	2	2	0	-1	2
AM681	408774407	409060255	285848	0	2	2	2	0	2	0	2	0	2	0	2	0	2	2	0	-1	0	0	0	2	2	0	2	-1	0	2	0	0	2	0	0	0	2	0	0	2	2	2	2	2	2	2	0	-1	2
AM682	409060256	410253862	1193606	0	2	2	2	0	2	0	2	0	2	0	2	0	2	2	0	-1	0	0	0	2	2	0	2	-1	0	2	0	0	2	0	0	0	2	0	0	2	2	2	2	2	2	2	0	-1	2
AM683	410253863	410488796	234933	0	2	2	2	0	2	0	2	0	2	0	2	0	2	2	0	-1	0	0	0	2	2	0	2	-1	0	2	0	0	2	0	0	0	2	0	0	2	2	2	2	2	2	2	0	-1	2
AM684	410488797	414872130	4383333	0	2	2	2	0	2	0	2	0	2	0	2	0	2	2	0	-1	0	0	0	2	2	0	2	-1	0	-1	0	0	2	0	0	0	2	0	0	2	2	2	2	2	2	2	0	-1	2
AM685	414872131	414877945	5814	0	2	2	2	0	2	0	2	0	2	0	2	0	2	2	0	-1	0	0	0	2	2	0	2	-1	0	-1	0	0	2	0	0	0	2	0	0	2	2	2	2	2	2	2	0	-1	2
AM686	414877946	415088588	210642	0	2	2	2	0	2	0	2	0	2	0	2	0	2	2	0	-1	0	0	0	2	2	0	2	-1	0	0	0	0	2	0	0	0	2	0	0	2	2	2	2	2	2	2	0	-1	2
AM687	415088589	415197470	108881	0	2	2	2	0	2	0	2	0	2	0	2	0	2	2	0	-1	0	0	0	2	2	0	2	-1	0	0	0	0	2	0	0	0	2	0	0	2	2	2	2	2	2	2	0	-1	2
AM688	415197471	415226081	28610	0	2	2	2	0	2	0	2	0	2	0	2	0	2	2	0	-1	0	0	0	2	2	0	2	-1	0	-1	0	0	2	0	0	0	2	0	0	2	2	2	2	2	2	2	0	-1	2
AM691	415226082	415281109	55027	0	2	2	2	0	2	0	2	0	2	0	2	0	2	2	0	-1	0	0	0	2	2	0	2	-1	0	-1	0	0	2	0	0	0	2	0	0	2	2	2	2	2	2	2	0	0	2
AM690	415281110	415382827	101717	0	2	2	2	0	2	0	2	0	2	0	2	0	2	2	0	-1	0	0	0	2	2	0	2	-1	0	-1	0	0	2	0	0	0	2	0	0	2	2	2	2	2	2	2	0	0	2
AM689	415382828	415821571	438743	0	2	2	2	0	2	0	2	0	2	0	2	0	2	2	0	-1	0	0	0	2	2	0	2	-1	0	-1	0	0	2	0	0	0	2	0	0	2	2	2	2	2	2	2	0	-1	2
AM692	415821572	415906331	84759	0	2	2	2	0	2	0	2	0	2	0	2	0	2	2	0	-1	0	0	0	2	2	0	2	-1	0	-1	0	0	2	0	0	0	2	0	0	2	2	2	2	2	2	2	0	-1	2
AM693	415906332	416089614	183282	0	2	2	2	0	2	0	2	0	2	0	2	0	2	2	0	-1	0	0	0	2	2	0	2	-1	0	-1	0	0	2	0	0	0	2	0	0	2	2	2	2	2	2	2	0	-1	0
AM694	416089615	416163487	73872	0	2	2	2	0	2	0	2	0	2	0	2	0	2	2	0	-1	0	0	0	2	2	0	2	-1	0	-1	0	0	2	0	0	0	2	0	0	2	2	2	2	2	2	2	0	-1	0
AM695	416163488	416206384	42896	0	2	2	2	0	2	0	2	0	2	0	2	0	2	2	0	-1	0	0	0	2	2	0	2	-1	0	-1	0	0	2	0	0	0	2	0	0	2	2	2	2	2	2	2	0	-1	0
AM696	416206385	416246682	40297	0	2	2	2	0	2	0	2	0	2	0	2	0	2	2	0	-1	0	0	0	2	2	0	2	-1	0	2	0	0	2	0	0	0	2	0	0	2	2	2	2	2	2	2	0	-1	0
AM697	416246683	416312754	66071	0	2	2	2	0	0	0	2	0	2	0	2	0	2	2	0	-1	0	0	0	2	2	0	2	-1	0	2	0	0	2	0	0	0	2	0	0	2	2	2	2	2	2	2	0	-1	0
AM698	416312755	416542401	229646	0	2	2	2	0	0	0	2	0	2	0	2	0	2	2	0	-1	0	0	0	2	2	0	2	-1	0	2	0	0	2	0	0	0	2	0	0	2	2	2	2	2	2	2	0	-1	0
AM699	416542402	416722638	180236	0	2	2	2	0	0	0	2	0	2	0	2	0	2	2	0	-1	0	0	0	2	2	0	2	-1	0	2	0	0	2	0	0	0	2	0	0	2	2	2	2	2	2	2	0	-1	0
AM700	416722639	416977084	254445	0	2	2	2	0	0	0	2	0	2	0	2	0	2	2	0	-1	0	0	0	2	2	0	2	-1	0	2	0	0	2	0	0	0	2	2	0	2	2	2	2	2	2	2	0	-1	0
AM701	416977085	417492382	515297	0	2	2	2	0	0	0	2	0	2	0	2	0	2	2	0	-1	0	0	0	2	2	0	2	-1	0	2	0	0	2	0	0	0	2	2	0	2	2	2	2	2	2	2	0	-1	0
AM702	417492383	418017432	525049	0	2	2	2	0	0	2	2	0	2	0	2	0	2	2	0	-1	0	0	0	2	2	0	2	-1	0	2	0	0	2	0	0	0	2	2	0	2	2	2	2	2	2	2	0	-1	0
AM703	418017433	418059894	42461	0	2	2	2	0	0	2	2	0	2	0	2	0	2	2	0	-1	0	0	0	2	2	0	2	-1	0	0	0	0	2	0	0	0	2	2	0	2	2	2	2	2	2	2	0	-1	0
AM705	418059895	418139363	79468	0	2	2	2	0	0	2	2	0	2	0	2	0	2	2	0	-1	0	0	0	2	2	0	2	-1	0	0	0	0	2	0	0	0	2	2	0	2	2	2	2	2	2	2	0	-1	0
AM707	418139364	418247896	108532	0	2	2	2	0	0	2	2	0	2	0	2	0	2	2	0	-1	0	0	0	2	2	0	2	-1	0	0	0	0	2	0	0	0	2	2	0	2	2	2	2	2	2	2	0	-1	0
AM704	418247897	418324296	76399	0	2	2	2	0	0	2	2	0	2	0	2	0	2	2	0	-1	0	0	0	2	2	0	2	-1	0	0	0	0	2	0	0	0	2	2	0	2	2	2	2	2	2	2	0	-1	0
AM706	418324297	418488429	164132	0	2	2	2	0	0	2	2	0	2	0	2	0	2	2	0	-1	0	0	0	2	2	0	2	-1	0	0	0	0	2	0	0	0	2	2	0	2	2	2	2	2	2	2	0	-1	0
AM708	418488430	418621705	133275	0	2	2	2	0	0	2	2	0	2	0	2	0	2	2	0	-1	0	0	0	2	2	0	2	-1	0	0	0	0	2	0	0	0	2	2	0	2	2	2	2	2	2	2	0	-1	0
AM709	418621706	418992827	371121	0	2	2	2	0	0	2	2	0	2	0	2	0	2	2	0	-1	0	0	0	2	2	0	2	-1	0	0	0	0	2	0	0	0	2	2	0	2	2	2	2	2	2	2	0	-1	0
AM710	418992828	419173175	180347	0	2	2	2	0	0	2	2	0	2	0	2	0	2	2	0	-1	0	0	0	2	2	0	2	-1	0	0	0	0	2	0	0	0	2	2	0	2	2	2	2	2	2	2	0	0	0
AM711	419173176	419481004	307828	0	2	2	2	0	0	2	2	0	2	0	2	0	2	2	0	-1	0	0	0	2	2	0	2	-1	0	0	0	0	2	0	0	0	2	2	0	2	0	2	2	2	2	2	0	0	0
AM713	419481005	420359767	878762	0	2	2	2	0	0	2	2	0	2	0	2	0	2	2	0	-1	0	0	0	2	2	0	2	-1	0	0	0	0	2	0	0	0	2	2	0	2	0	2	2	2	2	2	0	-1	0
AM712	420359768	420848044	488276	0	2	2	2	0	0	2	2	0	2	0	2	0	2	2	0	-1	0	0	0	2	2	0	2	-1	0	0	0	0	2	0	0	0	2	2	0	2	0	2	2	2	2	2	0	0	0
AM714	420848045	421356339	508294	0	2	2	2	0	0	2	2	0	2	0	2	0	2	2	0	-1	0	0	0	2	2	0	2	-1	0	0	0	0	2	0	0	0	2	2	0	2	0	2	2	2	2	2	0	-1	0
AM715	421356340	421603785	247445	0	2	2	2	0	0	2	2	0	2	0	2	0	2	2	0	-1	0	0	0	2	2	0	2	-1	0	0	0	0	0	0	0	0	2	2	0	2	0	2	2	2	2	2	0	-1	0
AM716	421603786	421968131	364345	0	2	2	2	0	0	2	2	0	2	0	2	0	2	2	0	-1	0	0	0	2	2	0	2	-1	0	0	0	0	0	0	0	0	2	2	0	2	0	2	2	2	2	2	0	-1	0
AM717	421968132	422037309	69177	0	2	2	2	0	0	2	2	0	2	0	2	0	2	2	0	-1	2	0	0	2	2	0	2	-1	0	0	0	0	0	0	0	0	2	2	0	2	0	2	2	2	2	2	0	-1	0
AM718	422037310	422305076	267766	0	2	2	2	0	0	2	2	0	2	0	2	0	2	2	0	2	2	0	0	2	2	0	2	-1	0	0	0	0	0	0	0	0	2	2	0	2	0	2	2	2	2	2	0	-1	0
AM719	422305077	422370414	65337	0	2	2	2	0	0	2	2	0	2	0	2	0	2	2	0	2	2	0	0	2	2	0	2	-1	0	2	0	0	0	0	0	0	2	2	0	2	0	2	2	2	2	2	0	-1	0
AM720	422370415	422662267	291852	0	2	2	2	0	0	2	2	0	2	0	2	0	2	2	0	2	2	0	0	2	2	0	2	-1	0	2	0	0	0	0	0	0	2	2	0	2	0	2	2	2	2	2	0	-1	0
AM722	422662268	423793085	1130817	0	2	2	2	0	0	2	2	0	2	0	2	0	2	2	0	-1	2	0	0	2	2	0	2	-1	0	2	0	0	0	0	0	0	2	2	0	2	0	2	2	2	2	2	0	-1	0
AM721	423793086	423897622	104536	0	2	2	2	0	0	2	2	0	2	0	2	0	2	2	0	-1	2	0	0	2	2	0	2	-1	0	2	0	0	0	0	0	0	2	2	0	2	0	2	2	2	2	2	0	-1	0
AM723	423897623	424377110	479487	0	2	2	2	0	0	2	2	0	2	0	2	0	2	2	0	-1	2	0	0	2	2	0	2	-1	0	2	0	0	0	0	0	0	2	2	0	2	0	2	2	2	2	2	0	-1	0
AM724	424377111	424412525	35414	0	2	2	2	0	0	2	2	0	2	0	2	0	2	2	0	-1	2	0	0	2	2	0	2	-1	0	2	0	0	0	0	0	0	2	2	0	2	0	2	2	2	2	2	0	-1	0
AM725	424412526	425490455	1077929	0	2	2	2	0	0	2	2	0	2	0	2	0	2	2	0	-1	2	0	0	2	2	0	2	-1	0	0	0	0	0	0	0	0	2	2	0	2	0	2	2	2	2	2	0	-1	0
AM726	425490456	425625792	135336	0	2	2	2	0	0	2	2	0	2	0	2	0	2	2	0	-1	2	2	2	2	2	0	2	-1	0	0	2	0	0	0	0	0	2	2	0	2	0	2	2	2	2	2	0	-1	0
AM727	425625793	425720437	94644	0	2	2	2	0	0	2	2	0	2	0	2	0	2	2	0	-1	2	2	2	2	2	0	2	-1	0	0	2	0	0	0	0	0	2	2	0	2	0	2	2	2	2	2	0	-1	0
AM728	425720438	426092624	372186	0	2	2	2	0	0	2	2	0	2	0	2	0	2	2	0	2	2	2	2	2	2	0	2	-1	0	0	2	0	0	0	0	0	2	2	0	2	0	2	2	2	2	2	0	-1	0
AM729	426092625	426249208	156583	0	2	2	2	0	0	2	2	0	2	0	2	0	2	2	0	2	2	2	2	2	2	0	2	-1	0	-1	2	0	0	0	0	0	2	2	0	2	0	2	2	2	2	2	0	-1	0
AM730	426249209	426430586	181377	0	2	2	2	0	0	2	2	0	2	0	2	0	2	2	0	2	2	2	2	2	2	0	2	-1	0	-1	2	0	0	0	0	0	2	2	0	2	0	2	2	2	2	2	0	-1	0
AM731	426430587	427013114	582527	0	2	2	2	0	0	2	2	0	2	0	2	0	2	2	0	2	2	2	2	2	2	0	2	-1	0	-1	2	0	0	0	0	0	2	2	0	2	0	2	2	2	2	2	0	-1	0
AM732	427013115	427315023	301908	0	2	2	2	0	0	2	2	0	2	0	2	0	2	2	0	-1	2	2	2	2	2	0	2	-1	0	-1	2	0	0	0	0	0	2	2	0	2	0	2	2	2	2	2	0	-1	0
AM733	427315024	427466009	150985	0	2	2	2	0	0	2	2	0	2	0	2	0	2	2	0	-1	2	2	2	2	2	0	2	-1	0	0	2	0	0	0	0	0	2	2	0	2	0	2	2	2	2	2	0	-1	0
AM734	427466010	427471188	5178	0	2	2	2	0	0	2	2	0	2	0	2	0	2	2	0	-1	2	2	2	2	2	0	2	-1	0	0	2	0	0	0	0	0	2	2	0	2	0	2	2	2	2	2	0	-1	0
AM735	427471189	427548837	77648	0	2	2	2	0	0	2	2	0	2	0	2	0	2	2	0	-1	2	2	2	2	2	0	2	-1	0	0	2	0	0	0	0	0	2	2	0	2	0	2	2	2	2	2	0	0	0
AM736	427548838	427588308	39470	0	2	2	2	0	0	2	2	0	2	0	2	0	2	2	0	-1	2	2	2	2	2	0	2	-1	0	0	2	0	0	0	0	0	2	2	0	2	0	2	2	2	2	2	0	0	0
AM737	427588309	429781358	2193049	0	2	2	2	0	0	2	2	0	2	0	2	0	2	2	0	-1	2	2	2	2	2	0	2	-1	0	-1	2	0	0	0	0	0	2	2	0	2	0	2	2	2	2	2	0	-1	0
AM742	429781359	430639552	858193	0	2	2	2	0	0	2	2	0	2	0	2	0	2	2	0	-1	2	2	2	2	2	0	2	-1	0	2	2	0	0	0	0	0	2	2	0	2	0	2	2	2	2	2	0	-1	0
AM741	430639553	430846869	207316	0	2	2	2	0	0	2	2	0	2	0	2	0	2	2	0	-1	2	2	2	2	2	0	2	-1	0	2	2	0	0	0	0	0	2	2	0	2	0	2	2	2	2	2	0	-1	0
AM738	430846870	431066726	219856	0	2	2	2	0	0	2	2	0	2	0	2	0	2	2	0	-1	2	2	2	2	2	0	2	-1	0	2	2	0	0	0	0	0	2	2	0	2	0	2	2	2	2	2	0	-1	0
AM740	431066727	431093705	26978	0	2	2	2	0	0	2	2	0	2	0	2	0	2	2	0	-1	2	2	2	2	2	0	2	-1	0	2	2	0	0	0	0	0	2	2	0	2	0	2	2	2	2	2	0	-1	0
AM739	431093706	431270209	176503	0	2	2	2	0	0	2	2	0	2	0	2	0	2	2	0	-1	2	2	2	2	2	0	2	-1	0	-1	2	0	0	0	0	0	2	2	0	2	0	2	2	2	2	2	0	-1	0
AM743	431270210	431406471	136261	0	2	2	2	0	0	2	2	0	2	0	2	0	2	2	0	-1	2	2	2	2	2	0	2	-1	0	-1	2	0	0	0	0	0	2	2	0	2	0	2	2	2	2	2	0	-1	0
AM744	431406472	431415828	9356	0	2	2	2	0	0	2	2	0	2	0	2	0	2	2	0	-1	2	2	2	2	2	0	2	-1	0	-1	2	0	0	0	0	0	2	2	0	2	0	2	2	2	2	2	0	-1	0
AM745	431415829	431442499	26670	0	2	2	2	0	0	2	2	0	2	0	2	0	2	2	0	-1	2	2	2	2	2	0	2	0	0	-1	2	0	0	0	0	0	2	2	0	2	0	2	2	2	2	2	0	-1	0
AM746	431442500	431566848	124348	0	2	2	2	0	0	2	2	0	2	0	2	0	2	2	0	-1	2	2	2	2	2	0	2	0	0	-1	2	0	0	0	0	0	2	2	0	2	0	2	2	2	2	2	0	-1	0
AM748	431566849	431738003	171154	0	2	2	2	0	0	2	2	0	2	0	2	0	2	2	0	-1	2	2	2	2	2	0	2	0	0	2	2	0	0	0	0	0	2	2	0	2	0	2	2	2	2	2	0	-1	0
AM749	431738004	432080007	342003	0	2	2	2	0	0	2	2	0	2	0	2	0	2	2	0	-1	2	2	2	2	2	0	2	0	0	-1	2	0	0	0	0	0	2	2	0	2	0	2	2	2	2	2	0	-1	0
AM747	432080008	432155972	75964	0	2	2	2	0	0	2	2	0	2	0	2	0	2	2	0	-1	2	2	2	2	2	0	2	0	0	2	2	0	0	0	0	0	2	2	0	2	0	2	2	2	2	2	0	-1	0
AM750	432155973	432431896	275923	0	2	2	2	0	0	2	2	0	2	0	2	0	2	2	0	-1	2	2	2	2	2	0	2	0	0	2	2	0	0	0	0	0	2	2	0	2	0	2	2	2	2	2	0	-1	0
AM751	432431897	432437237	5340	0	2	2	2	0	0	2	2	0	2	0	2	0	2	2	0	-1	2	2	2	2	2	0	2	0	0	2	2	0	0	0	0	0	2	2	0	2	0	2	2	2	2	2	0	-1	0
AM752	432437238	432528424	91186	0	2	2	2	0	0	2	2	0	2	0	2	0	2	2	0	-1	2	2	2	2	2	0	2	0	0	-1	2	0	0	0	0	0	2	2	0	2	0	2	2	2	2	2	0	-1	0
AM756	432528425	432599781	71356	0	2	2	2	0	0	2	2	0	2	0	2	0	2	2	0	-1	2	2	2	2	2	0	2	0	2	-1	2	0	0	0	0	0	2	2	0	2	0	2	2	2	2	2	0	-1	0
AM757	432599782	432758028	158246	0	2	2	2	0	0	2	2	0	2	0	2	0	2	2	0	-1	2	2	2	2	2	0	2	0	2	2	2	0	0	0	0	0	2	2	0	2	0	2	2	2	2	2	0	-1	0
AM753	432758029	432801322	43293	0	2	2	2	0	0	2	2	0	2	0	2	0	2	2	0	-1	2	2	2	2	2	0	2	0	2	2	2	0	0	0	0	0	2	2	0	2	0	2	2	2	2	2	0	-1	0
AM759	432801323	432878880	77557	0	2	2	2	0	0	2	2	0	2	0	2	0	2	2	0	-1	2	2	2	2	2	0	2	0	2	0	2	0	0	0	0	0	2	2	0	2	0	2	2	2	2	2	0	-1	0
AM760	432878881	432927721	48840	0	2	2	2	0	0	2	2	0	2	0	2	0	2	2	0	-1	2	2	2	2	2	0	2	0	2	0	2	0	0	0	0	0	2	2	0	2	0	2	2	2	2	2	0	-1	0
AM761	432927722	433067936	140214	0	2	2	2	0	0	2	2	0	2	0	2	0	2	2	0	-1	2	2	2	2	2	0	2	0	2	2	2	0	0	0	0	0	2	2	0	2	0	2	2	2	2	2	0	-1	0
AM754	433067937	433235355	167418	0	2	2	2	0	0	2	2	0	2	0	2	0	2	2	0	-1	2	2	2	2	2	0	2	0	2	-1	2	0	0	0	0	0	2	2	0	2	0	2	2	2	2	2	0	-1	0
AM758	433235356	433470545	235189	0	2	2	2	0	0	2	2	0	2	0	2	0	2	2	0	-1	2	2	2	2	2	0	2	0	2	-1	2	0	0	0	0	0	2	2	0	2	0	2	2	2	2	2	0	-1	0
AM762	433470546	433531307	60761	0	2	2	2	0	0	2	2	0	2	0	2	0	2	2	0	-1	2	2	2	2	2	0	2	0	2	-1	2	0	0	0	0	0	2	2	0	2	0	2	2	2	2	2	0	-1	0
AM755	433531308	433769010	237702	0	2	2	2	0	0	2	2	0	2	0	2	0	2	2	0	-1	2	2	2	2	2	0	2	0	2	2	2	0	0	0	0	0	2	2	0	2	0	2	2	2	2	2	0	-1	0
AM764	433769011	433819855	50844	0	2	2	2	0	0	2	2	0	2	0	0	0	2	2	0	-1	2	2	2	2	2	0	2	0	2	2	2	0	0	0	0	0	2	2	0	2	0	2	2	2	2	2	0	-1	0
AM766	433819856	434495657	675801	0	2	2	2	0	0	2	2	0	2	0	0	0	2	2	0	-1	2	2	2	2	2	0	2	0	2	2	2	0	0	0	0	0	2	2	0	2	0	2	2	2	2	2	0	-1	0
AM763	434495658	434571241	75583	0	2	2	2	0	0	2	2	0	2	0	0	0	2	2	0	-1	2	2	2	2	2	0	2	0	2	2	2	0	0	0	0	0	2	2	0	2	0	2	2	2	2	2	0	-1	0
AM765	434571242	434747372	176130	0	2	2	2	0	0	2	2	0	2	0	0	0	2	2	0	-1	2	2	2	2	2	0	2	0	2	2	2	0	0	0	0	0	2	2	0	2	0	2	2	2	2	2	0	-1	0
AM767	434747373	434934717	187344	0	2	2	2	0	0	2	2	0	2	0	0	0	2	2	0	-1	2	2	2	2	2	0	2	0	2	-1	2	0	0	0	0	0	2	2	0	2	0	2	2	2	2	2	0	-1	0
AM769	434934718	435299904	365186	0	2	2	2	0	0	2	2	0	2	0	0	0	2	2	0	-1	2	2	2	2	2	0	2	0	2	-1	2	0	0	0	0	0	2	2	0	2	0	2	2	2	2	2	0	-1	0
AM768	435299905	435472430	172525	0	2	2	2	0	0	2	2	0	2	0	0	0	2	2	0	-1	2	2	2	2	2	0	2	0	2	-1	2	0	0	0	0	0	2	2	0	2	0	2	2	2	2	2	0	-1	0
AM770	435472431	435485993	13562	0	2	2	2	0	0	2	2	0	2	0	0	0	2	2	0	-1	2	2	2	2	2	0	2	0	2	-1	2	0	0	0	0	0	2	2	0	2	0	2	2	2	2	2	0	-1	0
AM771	435485994	435902191	416197	0	2	2	2	0	0	2	2	0	2	0	0	0	2	2	0	-1	2	2	2	2	2	0	2	0	2	2	2	0	0	0	0	0	2	2	0	2	0	2	2	2	2	2	0	-1	0
AM772	435902192	435911589	9397	0	2	2	2	0	0	2	2	2	2	0	0	0	2	2	0	-1	2	2	2	2	2	0	2	0	2	2	2	0	0	0	0	0	2	2	0	2	0	2	2	2	2	2	0	-1	0
AM773	435911590	435921029	9439	0	2	2	2	0	0	2	2	2	2	0	0	0	2	2	0	0	2	2	2	2	2	0	2	0	2	0	2	0	0	0	0	0	2	2	0	2	0	2	2	2	2	2	0	-1	0
AM774	435921030	436305510	384480	0	2	2	2	0	0	2	2	2	2	0	0	0	2	2	0	0	2	2	2	2	2	0	2	0	2	0	2	0	0	0	0	0	2	2	0	2	0	2	2	2	2	2	0	-1	0
AM776	436305511	436348919	43408	0	2	2	2	0	0	2	2	2	2	0	0	0	2	2	0	0	2	2	2	2	2	0	2	0	2	0	2	0	0	0	0	0	2	2	0	2	0	2	2	2	2	2	0	-1	0
AM775	436348920	436400540	51620	0	2	2	2	0	0	2	2	2	2	0	0	0	2	2	0	0	2	2	2	2	2	0	2	0	2	0	2	0	0	0	0	0	2	2	0	2	0	2	2	2	2	2	0	-1	0
AM777	436400541	436441905	41364	0	2	2	2	0	0	2	2	2	2	0	0	0	2	2	0	0	2	2	2	2	2	0	2	0	2	0	2	0	0	0	0	0	2	2	0	2	0	2	2	2	2	2	0	-1	0
AM778	436441906	437904548	1462642	0	2	2	2	0	0	2	2	2	2	0	0	0	2	2	0	0	2	2	2	2	0	0	2	0	2	0	2	0	0	0	0	0	2	2	0	2	0	2	2	2	2	2	0	-1	0
AM779	437904549	438175834	271285	0	2	2	2	0	0	0	2	2	2	0	0	0	2	2	0	0	2	2	2	2	0	0	2	0	2	0	2	0	0	0	0	0	2	2	0	2	0	2	2	2	2	2	0	-1	0
AM780	438175835	438390628	214793	0	2	2	2	0	0	0	2	2	2	0	0	0	2	2	0	0	2	2	2	2	0	0	2	0	2	0	2	0	0	0	0	0	2	2	0	2	0	2	2	2	2	2	0	-1	0
AM781	438390629	438963723	573094	0	2	2	2	0	0	0	2	2	2	0	0	0	2	2	0	2	2	2	2	2	0	0	2	0	2	0	2	0	0	0	0	0	2	2	0	2	0	2	2	2	2	2	0	-1	0
AM782	438963724	439306019	342295	0	2	2	2	0	0	0	2	2	2	0	0	0	2	2	0	2	2	2	2	2	0	0	2	0	2	0	2	0	0	0	0	0	2	2	0	2	0	2	2	2	2	2	0	-1	0
AM783	439306020	441681887	2375867	0	2	2	2	0	0	0	2	2	2	0	0	0	2	2	0	2	2	2	2	2	0	0	2	0	2	0	2	0	0	0	0	0	2	2	0	2	0	2	2	2	2	2	0	-1	0
AM784	441681888	442178420	496532	0	2	2	2	0	0	0	2	2	2	0	0	0	2	2	0	2	2	2	2	2	0	0	2	0	2	0	2	0	0	0	0	0	2	2	0	2	0	0	2	2	2	2	0	-1	0
AM785	442178421	442530347	351926	0	2	2	2	0	0	0	2	2	2	0	0	0	2	2	0	2	2	2	2	2	0	0	2	0	2	0	2	0	0	0	0	0	2	2	0	2	0	0	2	2	2	2	0	-1	0
AM786	442530348	442558502	28154	0	2	2	2	0	0	0	2	2	2	0	0	0	2	2	0	2	2	2	2	2	0	0	2	0	2	0	2	0	0	0	0	0	2	2	0	2	0	0	2	2	2	2	0	-1	0
AM787	442558503	442613395	54892	0	2	2	2	0	0	0	2	2	2	0	0	0	2	2	0	2	2	2	2	2	0	0	2	0	2	0	2	0	0	0	0	0	2	2	0	2	0	0	2	2	2	2	0	2	0
AM788	442613396	443738814	1125418	0	2	2	2	0	0	0	2	2	2	0	0	0	2	2	0	2	2	2	2	2	0	0	2	0	2	0	2	0	0	0	0	0	2	2	0	2	0	0	2	2	2	2	0	2	0
AM789	443738815	447052827	3314012	0	2	2	2	0	0	0	2	2	2	0	2	0	2	2	0	2	2	2	2	2	0	0	2	0	2	0	2	0	0	0	0	0	2	2	0	2	0	0	2	2	2	2	0	2	0
AM790	447052828	447235034	182206	0	2	2	2	0	0	2	2	2	2	0	2	0	2	2	0	2	2	2	2	2	0	0	2	0	2	2	2	0	0	0	0	0	2	2	0	0	0	0	2	2	2	2	0	2	0
AM791	447235035	447257622	22587	0	2	2	2	0	0	2	2	2	2	0	0	0	2	2	0	2	2	2	2	2	0	0	2	0	2	2	2	0	0	0	0	0	2	2	0	0	0	0	2	2	2	2	0	2	0
AM792	447257623	447576078	318455	0	2	2	2	0	0	2	2	2	2	0	0	0	2	2	0	2	2	2	2	2	0	0	2	0	2	2	2	0	0	0	0	0	2	2	0	0	0	0	2	2	2	2	0	2	0
AM793	447576079	448718199	1142120	0	2	2	2	0	0	2	2	2	2	0	0	0	2	2	0	2	2	2	2	2	0	0	2	0	2	2	2	0	0	0	0	0	2	2	0	0	0	0	2	2	2	2	0	2	0
AM794	448718200	448767253	49053	0	2	2	2	0	0	0	2	2	2	0	0	0	2	2	0	2	2	2	2	2	0	0	2	0	2	2	2	0	0	0	0	0	2	2	0	0	0	0	2	2	2	2	0	2	0
AM795	448767254	448929745	162491	0	2	2	2	0	0	0	2	2	2	0	0	0	2	2	0	2	2	2	2	2	0	0	2	0	2	2	2	0	0	0	0	0	2	2	0	0	0	0	2	2	2	2	0	2	0
AM796	448929746	449515156	585410	0	2	2	2	0	0	0	2	2	2	0	0	0	2	2	0	2	2	2	2	2	0	0	2	0	2	2	2	0	0	0	0	0	2	2	0	0	0	0	2	2	2	2	0	2	0
AM798	449515157	449699262	184105	0	2	2	2	0	0	0	2	2	2	0	0	0	2	2	0	2	2	2	2	2	0	0	2	0	2	2	2	0	0	0	0	0	2	2	0	0	0	0	2	2	2	2	0	2	0
AM797	449699263	449964091	264828	0	2	2	2	0	0	0	2	2	2	0	0	0	2	2	0	2	2	2	2	2	0	0	2	0	2	2	2	0	0	0	0	0	2	2	0	0	0	0	2	2	2	2	0	2	0
AM799	449964092	450076479	112387	0	2	2	2	0	0	0	2	2	2	0	0	0	2	2	0	2	2	2	2	2	0	0	2	0	2	2	2	0	0	0	0	0	2	2	0	0	0	0	2	2	2	2	0	2	0
AM800	450076480	450104230	27750	0	2	2	2	0	0	0	2	2	2	0	0	0	2	2	0	2	2	2	2	2	0	0	2	0	2	2	2	0	0	0	0	0	2	2	0	0	0	0	2	2	2	2	0	2	0
AM801	450104231	450754899	650668	0	2	2	2	0	0	0	2	2	2	0	0	0	2	2	0	2	2	2	2	2	0	0	2	0	2	2	2	0	0	0	0	0	2	2	0	0	0	0	2	2	2	2	0	2	0
AM802	450754900	451511248	756348	0	2	2	2	0	0	0	2	2	2	0	0	0	0	2	0	2	2	2	2	2	0	0	2	0	2	2	2	0	0	0	0	0	2	2	0	0	0	0	2	2	2	2	0	2	0
AM803	451511249	451616740	105491	0	2	2	2	0	0	0	2	2	2	0	0	0	0	2	0	2	2	2	2	2	0	0	2	0	2	2	2	0	0	0	0	0	2	2	0	0	0	0	2	2	2	2	0	2	0
AM804	451616741	451685314	68573	0	2	2	2	0	0	0	2	2	2	0	0	0	0	2	0	2	2	2	2	2	0	0	2	0	2	0	2	0	0	0	0	0	2	2	0	0	0	0	2	2	2	2	0	2	0
AM805	451685315	451703058	17743	0	2	2	2	0	0	0	2	2	2	0	0	0	0	2	0	2	2	2	2	2	0	0	2	0	2	0	2	0	0	0	0	0	2	2	0	0	0	0	2	2	2	2	0	2	0
AM806	451703059	453143343	1440284	0	2	2	2	0	0	0	2	2	2	0	0	0	0	2	0	2	2	2	2	2	0	0	2	0	2	0	0	0	0	0	0	0	2	2	0	0	0	0	2	2	2	2	0	2	0
AM807	453143344	453901551	758207	0	2	2	2	0	0	0	2	2	2	0	0	0	0	2	0	2	2	2	2	2	0	0	2	0	2	0	0	0	0	0	0	0	2	2	0	0	0	0	2	2	2	2	0	2	0
AM808	453901552	454893485	991933	0	2	2	2	0	0	0	2	2	2	0	0	0	0	2	0	2	2	2	2	2	0	0	2	0	2	0	0	0	0	0	0	0	2	2	0	0	0	0	2	2	2	2	0	2	0
AM809	454893486	454996122	102636	0	2	2	2	0	0	0	2	2	2	0	0	0	0	2	0	2	2	2	2	2	0	0	2	0	2	2	0	0	0	0	0	0	2	2	0	0	0	0	2	2	2	2	0	2	0
AM810	454996123	455204009	207886	0	2	2	2	0	0	0	2	2	2	0	0	0	0	2	0	2	2	2	2	2	0	0	2	0	2	2	0	0	0	0	0	0	2	2	0	0	0	0	2	2	2	2	0	2	0
AM811	455204010	455281830	77820	0	2	2	2	0	0	0	2	2	2	0	0	0	0	2	0	2	2	2	2	2	0	0	2	0	2	2	0	0	0	0	0	0	2	2	0	0	0	0	2	2	2	2	0	2	0
AM812	455281831	455604825	322994	0	2	2	2	0	0	0	2	2	2	0	2	0	0	2	0	2	2	2	2	2	0	0	2	0	2	2	0	0	0	0	0	0	2	2	0	0	0	0	2	2	2	2	0	2	0
AM813	455604826	455638638	33812	0	2	2	2	0	0	0	2	2	2	0	2	0	0	2	0	2	2	2	2	2	0	0	2	0	2	2	0	0	0	0	0	0	2	2	0	0	0	0	2	2	2	2	0	2	0
AM814	455638639	455749108	110469	0	2	2	2	0	0	0	0	2	2	0	2	0	0	2	0	2	2	2	2	2	0	0	2	0	2	2	0	0	0	0	0	0	2	2	0	0	0	0	2	2	2	2	0	2	0
AM815	455749109	455956514	207405	0	2	2	2	0	0	0	0	2	2	0	2	0	0	2	0	2	2	2	2	2	0	0	2	0	2	2	0	0	0	0	0	0	2	2	0	0	0	0	2	2	2	2	0	2	0
AM816	455956515	456140867	184352	0	2	2	2	0	0	0	0	2	2	0	2	0	0	2	0	2	2	2	2	2	0	0	2	0	2	2	0	0	0	0	0	0	2	2	0	0	0	0	2	2	2	2	0	2	0
AM818	456140868	456330805	189937	0	2	2	2	0	0	0	0	2	2	0	2	0	0	2	0	2	2	2	2	2	0	0	2	0	2	2	0	0	0	0	0	0	2	2	0	0	0	0	2	2	2	2	0	2	0
AM817	456330806	457678522	1347716	0	2	2	2	0	0	0	0	2	2	0	2	0	0	2	0	2	2	2	2	2	0	0	2	0	2	2	0	0	0	0	0	0	2	2	0	0	0	0	2	2	2	2	0	2	0
AM819	457678523	458158723	480200	0	2	2	2	0	0	0	0	2	2	0	2	0	0	2	0	2	2	2	2	2	0	0	2	0	2	2	0	0	0	0	0	0	2	2	0	0	0	0	2	2	2	2	0	2	0
AM820	458158724	458368735	210011	0	2	2	2	0	0	0	0	2	2	0	0	0	0	2	0	2	2	2	2	2	0	0	2	0	2	0	0	0	0	0	0	0	2	2	0	0	0	0	2	2	2	2	0	2	0
AM821	458368736	460112644	1743908	0	2	2	2	0	0	0	0	2	2	0	0	0	0	2	0	2	2	2	2	2	0	0	2	0	2	0	-1	0	0	0	0	0	2	2	0	0	0	0	2	2	2	2	0	2	0
AM822	460112645	460380590	267945	0	2	2	2	0	0	0	0	2	2	0	0	0	0	2	0	2	2	2	2	2	0	0	2	0	2	0	-1	0	0	0	0	0	2	2	0	0	0	0	2	2	2	2	0	2	0
AM823	460380591	460840909	460318	0	2	2	2	0	0	0	0	2	2	0	0	0	0	2	0	2	2	2	2	2	0	0	2	0	2	0	-1	0	0	0	0	0	2	2	0	0	0	0	2	2	2	2	0	2	0
AM824	460840910	461364311	523401	0	2	2	2	0	0	0	0	2	2	0	0	0	0	2	0	2	2	2	2	2	0	0	2	0	2	0	0	0	0	0	0	0	2	2	0	0	0	0	2	2	2	2	0	2	0
AM825	461364312	461375919	11607	0	2	2	2	0	0	0	0	2	2	0	0	0	0	2	0	2	2	2	2	2	0	0	2	0	2	0	0	0	0	0	0	0	2	2	0	0	0	0	2	2	2	2	0	2	0
AM826	461375920	461402274	26354	0	2	2	2	0	0	0	0	0	2	0	0	0	0	2	0	2	2	2	2	2	0	0	2	0	2	0	0	0	0	0	0	0	2	2	0	0	0	0	2	2	2	2	0	2	0
AM827	461402275	461683049	280774	0	2	2	2	0	0	0	0	0	2	0	0	0	0	2	0	2	2	2	2	2	0	0	2	0	2	0	0	0	0	0	0	0	2	2	0	0	0	0	2	2	2	2	0	2	0
AM828	461683050	461694410	11360	0	2	2	2	0	0	0	0	0	2	0	0	0	0	2	-1	2	2	2	2	2	0	0	2	0	2	0	0	0	0	0	0	0	2	2	0	0	0	0	2	2	2	2	0	2	0
AM829	461694411	461855392	160981	0	2	2	2	0	0	0	0	0	2	0	0	0	0	2	-1	2	2	2	2	2	0	0	2	0	2	0	0	0	0	0	0	0	2	2	0	0	0	0	2	2	2	2	0	2	0
AM830	461855393	462041635	186242	0	2	2	2	0	0	0	0	0	2	0	0	0	0	2	-1	2	2	2	2	2	0	0	2	0	2	0	0	0	0	0	0	0	2	2	0	0	0	0	2	2	2	2	0	2	0
AM831	462041636	462263013	221377	0	2	2	2	0	0	0	0	0	2	0	0	0	0	2	0	2	2	2	2	2	0	0	2	0	2	0	0	0	0	0	0	0	2	2	0	0	0	0	2	2	2	2	0	2	0
AM832	462263014	462313644	50630	0	2	2	2	0	0	0	0	0	2	0	0	0	0	2	-1	2	2	2	2	2	0	0	2	0	2	0	0	0	0	0	0	0	2	2	0	0	0	0	2	2	2	2	0	2	0
AM833	462313645	464246461	1932816	0	2	2	2	0	0	0	0	0	2	0	0	2	0	2	-1	2	2	2	2	2	0	0	2	0	2	0	0	0	0	0	0	0	2	2	0	0	0	0	2	2	2	2	0	2	0
AM834	464246462	465825769	1579307	0	2	2	2	0	0	0	0	0	2	2	0	2	0	2	-1	2	2	2	2	2	0	0	2	0	2	0	0	0	0	0	0	0	2	2	0	0	0	0	2	2	2	2	0	2	0
AM835	465825770	466221497	395727	0	2	2	2	0	0	0	0	0	2	2	0	2	0	2	-1	2	2	2	2	2	0	0	2	0	2	2	0	0	0	0	0	0	2	2	0	0	0	0	2	2	2	2	0	2	0
AM836	466221498	466692421	470923	0	2	2	2	0	0	0	0	0	2	2	0	2	0	2	-1	2	2	2	2	2	0	0	2	0	2	2	0	0	0	0	0	0	2	2	0	0	0	0	2	2	2	2	0	2	0
AM837	466692422	466864094	171672	0	2	2	2	0	0	0	0	0	2	2	0	2	0	2	-1	2	2	2	2	2	0	0	2	0	2	2	0	0	0	0	0	0	2	2	0	0	0	0	2	2	2	2	0	2	0
AM838	466864095	467130718	266623	0	2	2	2	0	0	0	0	0	2	2	0	2	0	2	-1	2	2	2	2	2	0	0	2	0	2	2	0	0	0	0	0	0	2	2	0	0	0	0	2	2	2	2	0	2	0
AM839	467130719	467988533	857814	0	2	2	2	0	0	0	0	0	2	2	0	2	0	2	-1	2	2	2	2	2	0	0	2	0	2	2	0	0	0	0	0	0	2	2	0	0	0	0	2	2	2	2	0	0	0
AM840	467988534	468224857	236323	0	2	2	2	0	0	0	0	0	2	2	0	2	0	2	-1	2	2	2	2	2	0	0	2	0	2	2	0	0	0	0	0	0	2	2	0	0	0	0	2	2	2	2	0	0	0
AM841	468224858	468971359	746501	0	2	2	2	0	0	0	0	0	2	2	2	2	0	2	-1	2	2	2	2	2	0	0	2	2	2	2	0	0	0	0	0	0	2	2	0	0	0	0	2	2	2	2	0	0	0
AM842	468971360	469221977	250617	0	2	2	2	0	0	0	0	0	2	2	2	2	0	2	-1	2	2	2	2	2	0	0	2	2	2	2	0	0	0	0	0	0	2	2	0	0	0	0	2	2	2	2	0	0	0
AM843	469221978	469543373	321395	0	2	2	2	0	0	0	0	0	2	2	2	2	0	2	-1	2	2	2	2	2	0	0	2	2	2	2	0	0	0	0	0	0	2	2	0	0	0	0	2	2	2	2	0	0	0
AM845	469543374	469644668	101294	0	2	2	2	0	0	0	0	0	2	2	2	2	0	2	0	2	2	2	2	2	0	0	2	2	2	2	0	0	0	0	0	0	2	2	0	0	0	0	2	2	2	2	0	0	0
AM847	469644669	469828320	183651	0	2	2	2	0	0	0	0	0	2	2	2	2	0	2	-1	2	2	2	2	2	0	0	2	2	2	2	0	0	0	0	0	0	2	2	0	0	0	0	2	2	2	2	0	0	0
AM849	469828321	469882146	53825	0	2	2	2	0	0	0	0	0	2	2	2	2	0	2	0	2	2	2	2	2	0	0	2	2	2	2	0	0	0	0	0	0	2	2	0	0	0	0	2	2	2	2	0	0	0
AM844	469882147	471180432	1298285	0	2	2	2	0	0	0	0	0	2	2	2	2	0	2	-1	2	2	2	2	2	0	0	2	2	2	2	0	0	0	0	0	0	2	2	0	0	0	0	2	2	2	2	0	0	0
AM846	471180433	471622212	441779	0	2	2	2	0	0	0	0	0	2	2	2	2	0	2	0	2	2	2	2	2	0	0	2	2	2	2	0	0	0	0	0	0	2	2	0	0	0	0	2	2	2	2	0	0	0
AM848	471622213	471760868	138655	0	2	2	2	0	0	0	0	0	2	2	2	2	0	2	-1	2	2	2	2	2	0	0	2	2	2	2	0	0	0	0	0	0	2	2	0	0	0	0	2	2	2	2	0	0	0
AM850	471760869	471817405	56536	0	2	2	2	0	0	0	0	0	2	2	2	2	0	2	0	2	2	2	2	2	0	0	2	2	2	2	0	0	0	0	0	0	2	2	0	0	0	0	2	2	2	2	0	0	0
AM851	471817406	471827821	10415	0	2	2	2	0	0	0	0	0	2	2	2	2	0	2	0	2	2	2	2	2	0	0	2	2	2	2	0	0	0	0	0	0	2	2	0	0	0	0	2	2	2	2	0	0	0
AM852	471827822	471835434	7612	0	2	2	2	0	0	0	0	0	2	2	2	2	0	2	0	2	2	2	2	2	0	0	2	2	2	-1	0	0	0	0	0	0	2	2	0	0	0	0	2	2	2	2	0	0	0
AM853	471835435	471902045	66610	0	2	2	2	0	0	0	0	0	2	2	0	2	0	2	0	2	2	2	2	2	0	0	2	2	2	-1	0	0	0	0	0	0	2	2	0	0	0	0	2	2	2	2	0	0	0
AM854	471902046	472060313	158267	0	2	2	2	0	0	0	0	2	2	2	0	2	0	2	0	2	2	2	2	2	0	0	2	2	2	-1	0	0	0	0	0	0	2	2	0	0	0	0	2	2	2	2	0	0	0
AM855	472060314	472091960	31646	0	2	2	2	0	0	0	0	2	2	2	0	2	0	2	-1	2	2	2	2	2	0	0	2	2	2	-1	0	0	0	0	0	0	2	2	0	0	0	0	2	2	2	2	0	0	0
AM856	472091961	472109743	17782	0	2	2	2	0	0	0	0	2	2	2	0	2	0	2	-1	2	2	2	2	2	0	0	2	2	2	-1	0	0	0	0	0	0	2	2	0	0	0	0	2	2	2	2	0	0	0
AM857	472109744	473383426	1273682	0	2	2	2	0	0	2	0	2	2	2	0	2	0	2	-1	2	2	2	2	2	0	0	2	2	2	-1	0	0	0	0	0	0	2	2	2	0	0	0	2	2	2	2	0	0	0
AM858	473383427	473397691	14264	0	2	2	2	0	0	2	0	2	2	2	0	2	0	2	-1	2	2	2	2	2	0	0	2	2	2	-1	0	0	0	0	0	2	2	2	2	0	0	0	2	2	2	2	0	0	0
AM859	473397692	473408065	10373	0	2	2	2	0	0	2	0	2	2	2	0	2	0	2	-1	2	2	2	2	2	0	0	2	2	0	-1	0	0	0	0	0	2	2	2	2	0	0	0	2	2	2	2	0	0	0
AM860	473408066	473419204	11138	0	2	2	2	0	0	2	0	2	2	2	0	2	0	2	0	2	2	2	2	2	0	0	2	2	0	-1	0	0	0	0	0	2	2	2	2	0	0	0	2	2	2	2	0	0	0
AM861	473419205	473572474	153269	0	2	2	2	0	0	2	0	2	2	2	0	2	0	2	0	2	2	2	2	2	0	0	2	2	0	2	0	0	0	0	0	2	2	2	2	0	0	0	2	2	2	2	0	0	0
AM862	473572475	473642622	70147	0	2	2	2	0	0	2	0	2	2	2	0	2	0	2	0	2	2	2	2	2	0	0	2	2	0	2	0	0	0	0	0	2	2	2	2	0	0	0	2	2	2	2	0	0	0
AM863	473642623	473661883	19260	0	2	2	2	0	0	2	0	2	2	2	0	2	0	2	2	2	2	2	2	2	0	0	2	2	0	2	0	0	0	0	0	2	2	2	2	0	0	0	2	2	2	2	0	0	0
AM864	473661884	473716525	54641	0	2	2	2	0	0	2	0	2	2	2	0	2	0	2	2	2	2	2	2	2	0	0	2	2	0	2	0	0	0	0	0	2	2	2	2	0	0	0	2	2	2	2	0	0	0
AM865	473716526	474002870	286344	0	2	2	2	0	0	2	0	2	2	2	-1	2	0	2	2	2	2	2	2	2	0	0	2	2	0	2	0	0	0	0	0	2	2	2	2	0	0	0	2	2	2	2	0	0	0
AM866	474002871	474096531	93660	0	2	2	2	0	0	2	0	2	2	2	-1	2	0	2	2	2	2	2	2	2	0	0	2	2	0	-1	0	0	0	0	0	2	2	2	2	0	0	0	2	2	2	2	0	0	0
AM867	474096532	474384099	287567	0	2	2	2	0	0	2	0	2	2	2	-1	2	0	2	2	2	2	2	2	2	0	0	2	2	0	-1	0	0	0	0	0	2	2	2	2	0	0	0	2	2	2	2	0	0	0
AM868	474384100	474396725	12625	0	2	2	2	0	0	2	0	2	2	2	0	2	0	2	2	2	2	2	2	2	0	0	2	2	0	0	0	0	0	0	0	2	2	2	2	0	0	0	2	2	2	2	0	0	0
AM869	474396726	474511545	114819	0	2	2	2	0	0	2	0	2	2	2	0	2	0	2	2	2	2	2	2	2	0	0	2	2	0	0	0	0	0	0	0	2	2	2	2	0	0	0	2	2	2	2	0	0	0
AM870	474511546	474762555	251009	0	2	2	2	0	0	2	0	2	2	2	0	2	0	2	2	2	2	2	2	2	0	0	2	2	0	-1	0	0	0	0	0	2	2	2	2	0	0	0	2	2	2	2	0	0	0
AM871	474762556	474953038	190482	0	2	2	2	0	0	2	0	2	2	2	0	2	0	2	2	2	2	2	2	2	0	0	2	2	0	2	0	0	0	0	0	2	2	2	2	0	0	0	2	2	2	2	0	0	0
AM872	474953039	475153069	200030	0	2	2	2	0	0	2	0	2	2	2	-1	2	0	2	2	2	2	2	2	2	0	0	2	2	0	2	0	0	0	0	0	2	2	2	2	0	0	0	2	2	2	2	0	0	0
AM873	475153070	475266775	113705	0	2	2	2	0	0	2	0	2	2	2	-1	2	0	2	2	2	2	2	2	2	0	0	2	2	0	2	0	0	0	0	0	2	2	2	2	0	0	0	2	2	2	2	0	0	0
AM874	475266776	475317823	51047	0	2	2	2	0	0	2	0	2	2	2	-1	2	0	2	2	2	2	2	2	2	0	0	2	2	0	2	0	0	0	0	0	2	2	2	2	0	0	0	2	2	2	2	0	0	0
AM875	475317824	475366503	48679	0	2	2	2	0	0	2	0	2	2	2	-1	2	0	2	2	2	2	2	2	2	0	0	2	2	0	-1	0	0	0	0	0	2	2	2	2	0	0	0	2	2	2	2	0	0	0
AM876	475366504	475384362	17858	0	2	2	2	0	0	2	0	2	2	2	-1	2	0	2	2	2	2	2	2	2	0	0	2	2	0	-1	0	0	0	0	0	2	2	2	2	0	0	0	2	2	2	2	0	0	0
AM877	475384363	475406559	22196	0	2	2	2	0	0	2	0	2	2	2	-1	2	0	2	2	2	2	2	2	2	0	0	2	2	0	-1	0	0	0	0	0	2	2	2	2	0	0	0	2	2	2	2	0	0	0
AM878	475406560	475568374	161814	0	2	2	2	0	0	2	0	2	2	2	-1	2	0	2	2	2	2	2	2	2	0	0	2	2	0	-1	0	0	0	0	0	2	2	2	2	0	0	0	2	2	2	2	0	0	0
AM879	475568375	475648554	80179	0	2	2	2	0	0	2	0	2	2	2	-1	2	0	2	2	2	2	2	2	2	0	0	2	2	0	-1	0	0	0	0	0	2	2	2	2	0	0	0	2	2	2	2	0	0	0
AM881	475648555	475654637	6082	0	2	2	2	0	0	2	0	2	2	2	-1	2	0	2	2	2	2	2	2	2	0	0	2	2	0	-1	0	0	0	0	0	2	2	2	2	0	0	0	2	2	2	2	0	0	0
AM882	475654638	476122903	468265	0	2	2	2	0	0	2	0	2	2	2	-1	2	0	2	2	2	2	2	2	2	0	0	2	2	0	2	0	0	0	0	0	2	2	2	2	0	0	0	2	2	2	2	0	0	0
AM883	476122904	476228917	106013	0	2	2	2	0	0	2	0	2	2	2	2	2	0	2	2	2	2	2	2	2	0	0	2	2	0	2	0	0	0	0	0	2	2	2	2	0	0	0	2	2	2	2	0	0	0
AM880	476228918	476261707	32789	0	2	2	2	0	0	2	0	2	2	2	2	2	0	2	2	2	2	2	2	2	0	0	2	2	0	-1	0	0	0	0	0	2	2	2	2	0	0	0	2	2	2	2	0	0	0
AM884	476261708	476362281	100573	0	2	2	2	0	0	2	0	2	2	2	0	2	0	2	2	2	2	2	2	2	0	0	2	2	0	-1	0	0	0	0	0	2	2	2	2	0	0	0	2	2	2	2	0	0	0
AM885	476362282	476480237	117955	0	2	2	2	0	0	2	0	2	2	2	0	2	0	2	2	2	2	2	2	2	0	0	2	2	0	-1	0	0	0	0	0	2	2	2	2	0	0	0	2	2	2	2	0	0	0
AM886	476480238	476641911	161673	0	2	2	2	0	0	2	0	2	2	2	0	2	0	2	2	2	2	2	2	2	0	0	2	2	0	-1	0	0	0	0	0	2	2	2	2	0	0	0	2	2	0	0	0	0	0
AM887	476641912	476674381	32469	0	2	2	2	0	0	2	0	2	2	2	0	2	0	2	2	2	2	2	2	2	0	0	2	2	0	-1	0	0	0	0	0	2	2	2	2	0	0	0	2	2	0	0	0	0	0
AM888	476674382	476745617	71235	0	2	2	2	0	0	2	0	2	2	2	0	2	0	2	2	2	2	2	2	2	0	0	2	2	0	-1	0	0	0	0	0	2	2	2	2	2	0	0	2	2	0	0	0	0	0
AM890	476745618	476753887	8269	0	2	2	2	0	0	2	0	2	2	2	0	2	0	2	2	2	2	2	2	2	0	0	2	2	0	-1	0	0	0	0	0	2	2	2	2	2	0	0	2	2	0	0	0	0	0
AM889	476753888	477357695	603807	0	2	2	2	0	0	2	0	2	2	2	0	2	0	2	2	2	2	2	2	2	0	0	2	2	0	-1	0	0	0	0	0	2	2	2	2	2	0	0	2	2	0	0	0	0	0
AM891	477357696	477442506	84810	0	2	2	2	0	0	2	0	2	2	2	0	2	0	2	2	2	2	2	2	2	0	0	2	2	0	-1	0	0	0	0	0	2	2	2	2	2	0	0	2	2	0	0	0	0	0
AM892	477442507	477456294	13787	0	2	2	2	0	0	2	0	2	2	2	0	2	0	2	2	2	2	2	2	2	0	0	2	2	0	2	0	0	0	0	0	2	2	2	2	2	0	0	2	2	0	0	0	0	0
AM893	477456295	478258664	802369	0	2	2	2	0	0	2	0	2	2	2	-1	2	0	2	2	2	2	2	2	2	0	0	2	2	0	2	0	0	0	0	0	2	2	2	2	2	0	0	2	2	0	0	0	0	0
AM894	478258665	478300503	41838	0	2	2	2	0	0	2	0	2	2	2	-1	2	0	2	2	2	2	2	2	2	0	0	2	2	0	2	0	0	0	0	0	2	2	2	2	2	0	0	2	2	0	0	0	0	0
AM895	478300504	478382831	82327	0	2	2	2	0	0	2	0	2	2	2	-1	2	0	2	2	2	2	2	2	2	0	0	2	2	0	2	0	0	0	0	0	2	2	2	2	2	0	0	2	2	0	0	0	0	0
AM896	478382832	478481024	98192	0	2	2	2	0	0	2	0	2	2	2	0	2	0	2	2	2	2	2	2	2	0	0	2	2	0	2	0	0	0	0	0	2	2	2	2	2	0	0	2	2	0	0	0	0	0
AM897	478481025	478680853	199828	0	2	2	2	0	0	2	0	2	2	2	0	2	0	2	2	2	2	2	2	2	0	0	2	2	0	2	0	0	0	0	0	2	2	2	2	2	0	0	2	2	0	0	0	0	0
AM898	478680854	478787374	106520	0	2	2	2	0	0	2	0	2	2	2	0	2	0	2	2	2	2	2	2	2	0	0	2	2	0	2	0	0	0	0	0	2	2	2	2	2	0	0	2	2	0	0	0	0	0
AM899	478787375	478917980	130605	0	2	2	2	0	0	2	0	2	2	2	0	2	0	2	2	2	2	2	2	2	0	0	2	2	0	2	0	0	0	0	0	2	2	2	2	2	0	0	2	2	0	0	0	0	0
AM900	478917981	479249040	331059	0	2	2	2	0	0	2	0	2	2	2	0	2	0	2	2	2	2	2	2	2	0	0	2	2	0	2	0	0	0	0	0	2	2	2	2	2	0	0	2	2	0	0	0	0	0
AM901	479249041	479362391	113350	0	2	2	2	0	0	2	0	2	2	2	0	2	0	2	2	2	2	2	2	2	0	0	2	2	0	2	0	0	0	0	0	2	2	2	2	2	0	0	2	2	0	0	0	0	0
AM902	479362392	479603405	241013	0	2	2	2	0	0	2	0	2	2	2	0	2	0	2	2	2	2	2	2	2	0	0	2	2	0	2	0	0	0	0	0	2	2	2	2	2	0	0	2	2	0	0	0	0	0
AM903	479603406	479627561	24155	0	2	2	2	0	0	2	0	2	2	2	-1	2	0	2	2	2	2	2	2	2	0	0	2	2	0	2	0	0	0	0	0	2	2	2	2	2	0	0	2	2	0	0	0	0	0
AM904	479627562	479644036	16474	0	2	2	2	0	0	2	0	2	2	2	-1	2	0	2	2	2	2	2	2	2	0	0	2	2	0	2	0	0	0	0	2	2	2	2	2	2	0	0	2	2	0	0	0	0	0
AM905	479644037	479700650	56613	0	2	2	2	0	0	2	0	2	2	2	-1	2	0	2	2	2	2	2	2	2	0	0	2	2	0	2	0	0	0	0	2	2	2	2	2	2	0	0	2	2	0	0	0	0	0
AM906	479700651	480154541	453890	0	2	2	2	0	0	2	0	2	2	2	-1	2	0	2	2	2	2	2	2	2	0	0	2	2	0	2	0	0	0	0	2	2	2	2	2	2	0	0	2	2	0	0	0	0	0
AM907	480154542	480178715	24173	0	2	2	2	0	0	2	0	2	2	2	-1	2	0	2	2	2	2	2	2	2	0	0	2	2	0	2	0	0	0	0	2	2	2	2	2	2	0	0	2	2	0	0	0	0	0
AM910	480178716	480499509	320793	0	2	2	2	0	0	2	0	2	2	2	-1	2	0	2	2	2	2	2	2	2	0	0	2	2	0	2	0	0	0	0	2	2	2	2	2	2	0	0	2	2	0	0	0	0	0
AM911	480499510	480823042	323532	0	2	2	2	0	0	2	0	2	2	2	-1	2	0	2	2	2	2	2	2	2	0	0	2	2	0	-1	0	0	0	0	2	2	2	2	2	2	0	0	2	2	0	0	0	0	0
AM909	480823043	480996686	173643	0	2	2	2	0	0	2	0	2	2	2	-1	2	0	2	2	2	2	2	2	2	0	0	2	2	0	-1	0	0	0	0	2	2	2	2	2	2	0	0	2	2	0	0	0	0	0
AM912	480996687	481141599	144912	0	2	2	2	0	0	2	0	2	2	2	-1	2	0	2	2	2	2	2	2	2	0	0	2	2	0	-1	0	0	0	0	2	2	2	2	2	2	0	0	2	2	0	0	0	0	0
AM908	481141600	481218852	77252	0	2	2	2	0	0	2	0	2	2	2	-1	2	0	2	2	2	2	2	2	2	0	0	2	2	0	-1	0	0	0	0	2	2	2	2	2	2	0	0	2	2	0	0	0	0	0
AM913	481218853	481229555	10702	0	2	2	2	0	0	2	0	2	2	2	0	2	0	2	2	2	2	2	2	2	0	0	2	2	0	2	0	0	0	0	2	2	2	2	2	2	0	0	2	2	0	0	0	0	0
AM914	481229556	481263521	33965	0	2	2	2	0	0	2	0	2	2	2	0	2	0	2	2	2	2	2	2	2	0	0	2	2	0	2	0	0	0	0	2	2	2	2	2	2	0	0	2	2	0	0	0	0	0
AM915	481263522	481401497	137975	0	2	2	2	0	0	2	0	2	2	2	0	2	0	2	2	2	2	2	2	2	0	0	2	2	0	2	0	0	0	0	2	2	2	2	2	2	0	0	2	2	0	0	0	0	0
AM916	481401498	481529128	127630	0	2	2	2	0	0	2	0	2	2	2	0	2	0	2	2	2	0	2	2	2	0	0	2	2	0	2	0	0	0	0	2	2	2	2	2	2	0	0	2	2	0	0	0	0	0
AM918	481529129	481597743	68614	0	2	2	2	0	0	2	0	2	2	2	0	2	0	2	2	2	0	2	2	2	0	0	2	2	0	2	0	0	0	0	2	2	2	2	2	2	0	0	2	2	0	0	0	0	0
AM917	481597744	482066741	468997	0	2	2	2	0	0	2	0	2	2	2	0	2	0	2	2	2	0	2	2	2	0	0	2	2	0	2	0	0	0	0	2	2	2	2	2	2	0	0	2	2	0	0	0	0	0
AM919	482066742	482072391	5649	0	2	2	2	0	0	2	0	2	2	2	2	2	0	2	2	2	0	2	2	2	0	0	2	2	0	2	0	0	0	0	2	2	2	2	2	2	0	0	2	2	0	0	0	0	0
AM920	482072392	482200585	128193	0	2	2	2	0	0	2	0	2	2	2	2	2	0	2	2	2	0	2	2	2	0	0	2	2	0	2	0	0	0	0	2	2	2	2	2	2	0	0	2	2	0	0	0	0	0
AM921	482200586	482335581	134995	0	2	2	2	0	0	2	0	2	2	2	2	2	0	2	2	2	0	2	2	2	0	0	2	2	0	2	0	0	0	0	2	2	2	2	2	2	0	0	2	2	0	0	0	0	0
AM922	482335582	482380182	44600	0	2	2	2	0	0	2	0	2	2	2	0	2	0	2	2	2	0	2	2	2	0	0	2	2	0	2	0	0	0	0	2	2	2	2	2	2	0	0	2	2	0	0	0	0	0
AM923	482380183	482602962	222779	0	2	2	2	0	0	2	0	2	2	2	0	2	0	2	2	2	0	2	2	2	0	0	2	2	0	2	0	0	0	0	2	2	2	2	2	2	0	0	2	2	0	0	0	0	0
AM924	482602963	482770501	167538	0	2	2	2	0	0	2	0	2	2	2	0	2	0	2	2	2	0	2	2	2	0	0	2	2	0	2	0	0	0	0	2	2	2	2	2	2	0	0	2	2	0	0	0	0	0
AM927	482770502	482894605	124103	0	2	2	2	0	0	2	0	2	2	2	0	2	0	2	2	2	0	2	2	2	0	0	2	2	0	2	0	0	0	0	2	2	2	2	2	2	2	0	2	2	0	0	0	0	0
AM929	482894606	483025185	130579	0	2	2	2	0	0	2	0	2	2	2	0	2	0	2	2	2	0	2	2	2	0	0	2	2	0	2	0	0	0	0	2	2	2	2	2	2	2	0	2	2	0	0	0	0	0
AM925	483025186	483286206	261020	0	2	2	2	0	0	2	0	2	2	2	0	2	0	2	2	2	0	2	2	2	0	0	2	2	0	2	0	0	0	0	2	2	2	2	2	2	2	0	2	2	0	0	0	0	0
AM926	483286207	483468852	182645	0	2	2	2	0	0	2	0	2	2	2	0	2	0	2	2	2	0	2	2	2	0	0	2	2	0	2	0	0	0	0	2	2	2	2	2	2	2	0	2	2	0	0	0	0	0
AM928	483468853	483602516	133663	0	2	2	2	0	0	2	0	2	2	2	0	2	0	2	2	2	0	2	2	2	0	0	2	2	0	2	0	0	0	0	2	2	2	2	2	2	2	0	2	2	0	0	0	0	0
AM930	483602517	483766165	163648	0	2	2	2	0	0	2	0	2	2	2	0	2	0	2	2	2	0	2	2	2	0	0	2	2	0	2	0	0	0	0	2	2	2	2	2	2	2	0	2	2	0	0	0	0	0
AM934	483766166	483840246	74080	0	2	2	2	0	0	2	0	2	2	2	0	2	0	2	2	2	0	2	2	2	0	0	2	2	0	0	0	0	0	0	2	2	2	2	2	2	2	0	2	2	0	0	0	0	0
AM931	483840247	483862371	22124	0	2	2	2	0	0	2	0	2	2	2	0	2	0	2	2	2	0	2	2	2	0	0	2	2	0	0	0	0	0	0	2	2	2	2	2	2	2	0	2	2	0	0	0	0	0
AM932	483862372	484510693	648321	0	2	2	2	0	0	2	0	2	2	2	0	2	0	2	2	2	0	2	2	2	0	0	2	2	0	0	0	0	0	0	2	2	2	2	2	2	2	0	2	2	0	0	0	0	0
AM933	484510694	484564517	53823	0	2	2	2	0	0	2	0	2	2	2	0	2	0	2	2	2	0	2	2	2	0	0	2	2	0	-1	0	0	0	0	2	2	2	2	2	2	2	0	2	2	0	0	0	0	0
AM935	484564518	484573986	9468	0	2	2	2	0	0	2	0	2	2	2	0	2	0	2	2	2	0	2	2	2	0	0	2	2	0	-1	0	0	0	0	2	2	2	2	2	2	2	0	2	2	0	0	0	0	0
AM936	484573987	484620803	46816	0	2	2	2	0	0	2	0	2	2	2	0	2	0	2	2	2	0	2	2	2	0	0	2	2	0	-1	0	0	0	0	2	2	2	2	2	2	2	0	2	2	0	0	0	0	0
AM937	484620804	484833039	212235	0	2	2	2	0	0	2	0	2	2	2	0	2	0	2	2	2	0	2	2	2	0	0	2	2	0	-1	0	0	0	0	2	2	2	2	2	2	2	0	2	2	0	0	0	0	0
AM938	484833040	484998892	165852	0	2	2	2	0	0	2	0	2	2	2	0	2	0	2	2	2	0	2	2	2	0	0	2	2	0	-1	0	0	0	0	2	2	2	2	2	2	2	0	2	2	0	0	0	0	0
AM939	484998893	485016240	17347	0	2	2	2	0	0	2	0	2	2	2	0	2	0	2	2	2	0	2	2	2	0	0	2	2	0	-1	0	0	0	0	2	2	2	2	2	2	2	0	2	2	0	0	0	0	0
AM941	485016241	485058411	42170	0	2	2	2	0	0	2	0	2	2	2	0	2	0	2	2	2	0	2	2	2	0	0	2	2	0	-1	0	0	0	0	2	2	2	2	2	2	2	0	2	2	0	0	0	0	0
AM940	485058412	485147544	89132	0	2	2	2	0	0	2	0	2	2	2	0	2	0	2	2	2	0	2	2	2	0	0	2	2	0	-1	0	0	0	0	2	2	2	2	2	2	2	0	2	2	0	0	0	0	0
AM942	485147545	485271446	123901	0	2	2	2	0	0	2	0	2	2	2	0	2	0	2	2	2	0	2	2	2	0	0	2	2	0	-1	0	0	0	0	2	2	2	2	2	2	2	2	2	2	0	0	0	0	0
AM943	485271447	485381447	110000	0	2	2	2	0	0	2	0	2	2	2	0	2	0	2	2	2	0	2	2	2	0	0	2	2	0	0	0	0	0	0	2	2	2	2	2	2	2	2	2	2	0	0	0	0	0
AM944	485381448	485464999	83551	0	2	2	2	0	0	2	0	2	2	2	0	2	0	2	2	2	0	2	2	2	0	0	2	2	0	0	0	0	0	0	2	2	2	2	2	2	2	2	2	2	0	0	0	0	0
AM945	485465000	486278846	813846	0	2	2	2	0	0	2	0	2	2	2	0	2	0	2	2	2	0	2	2	2	0	0	2	2	0	0	0	0	0	0	2	2	2	2	2	2	2	2	2	2	0	0	0	0	0
AM946	486278847	486587944	309097	0	2	2	2	0	0	2	0	2	2	2	0	2	0	2	2	2	2	2	2	2	0	0	2	2	0	0	0	0	0	0	2	2	2	2	2	2	2	2	2	2	0	0	0	0	0
AM947	486587945	486630162	42217	0	2	2	2	0	0	2	0	2	2	2	0	2	0	2	2	2	2	2	2	2	0	0	2	2	0	0	0	0	0	0	2	2	2	2	2	2	2	2	2	2	0	0	0	0	0
AM948	486630163	486701338	71175	0	2	2	2	0	0	2	0	2	2	2	0	2	0	2	2	2	2	2	2	2	0	0	2	2	0	0	0	0	0	0	2	2	2	2	2	2	2	2	2	2	0	0	0	0	0
AM949	486701339	486764819	63480	0	2	2	2	0	0	2	0	2	2	2	0	2	0	2	2	2	2	2	2	2	0	0	2	2	0	0	0	0	0	0	2	2	2	2	2	2	2	2	2	2	0	0	0	0	0
AM950	486764820	486859824	95004	0	2	2	2	0	0	2	0	2	2	2	0	2	0	2	2	2	2	2	2	2	0	0	2	2	0	0	0	0	0	0	2	2	2	2	2	2	2	2	2	2	0	0	0	0	0
AM951	486859825	486924279	64454	0	2	2	2	0	0	2	0	2	2	2	0	2	0	2	2	2	2	2	2	2	0	0	2	2	0	0	0	0	0	0	2	2	2	2	2	2	2	0	2	2	0	0	0	0	0
AM952	486924280	486996296	72016	0	2	2	2	0	0	2	0	2	2	2	0	2	0	2	2	2	2	2	2	2	0	0	2	2	0	0	0	0	0	0	2	2	2	2	2	2	2	0	2	2	0	0	0	0	0
AM953	486996297	487070004	73707	0	2	2	2	0	0	2	0	2	2	2	0	2	0	2	2	2	2	2	2	2	0	0	2	2	0	0	0	0	0	0	2	2	2	2	2	2	2	0	2	2	0	0	0	0	0
AM955	487070005	487234689	164684	0	0	2	2	0	0	2	0	2	2	2	2	2	0	2	2	2	2	2	2	2	0	0	2	2	0	2	0	0	0	0	2	2	2	0	2	2	2	0	2	2	0	0	0	0	0
AM954	487234690	487513720	279030	0	-1	2	2	0	0	2	0	2	2	2	2	2	0	2	2	2	2	2	2	2	0	0	2	2	0	2	0	0	0	0	2	2	2	0	2	2	2	0	2	2	0	0	0	0	0
AM956	487513721	487523313	9592	0	0	2	2	0	0	2	0	2	2	2	2	2	0	2	2	2	2	2	2	2	0	0	2	2	0	2	0	0	0	0	2	2	2	0	2	2	2	0	2	2	0	0	0	0	0
AM957	487523314	487607387	84073	0	0	2	2	0	0	2	0	2	2	2	2	2	0	2	2	-1	2	2	2	2	0	0	2	2	0	2	0	0	0	0	2	2	2	0	2	2	2	0	2	2	0	0	0	0	0
AM958	487607388	487705805	98417	0	0	2	2	0	0	2	0	2	2	2	2	2	0	2	2	-1	2	2	2	2	0	0	2	2	0	2	0	0	0	0	2	2	2	0	2	2	2	0	2	2	0	0	0	0	0
AM959	487705806	487931173	225367	0	0	2	2	0	0	2	0	2	2	2	2	2	0	2	2	-1	2	2	2	2	0	0	2	2	0	2	0	0	0	0	2	2	2	0	2	2	2	0	2	2	0	0	0	0	0
AM960	487931174	487985537	54363	0	0	2	2	0	0	2	0	2	2	2	2	2	0	2	2	-1	2	2	2	2	0	0	2	2	0	2	0	0	0	0	2	2	2	0	2	0	2	0	2	2	0	0	0	0	0
AM961	487985538	488224878	239340	0	0	2	2	0	0	2	0	2	2	2	2	2	0	2	2	-1	2	2	2	2	0	0	2	2	0	2	0	0	0	0	2	2	2	0	2	0	2	0	2	2	0	0	0	0	0
AM962	488224879	488232190	7311	0	0	2	2	0	0	2	0	2	2	2	2	2	0	2	2	-1	2	2	2	2	0	0	2	2	0	2	0	0	0	0	2	2	2	0	2	0	2	0	2	2	0	0	0	0	0
AM963	488232191	488633463	401272	0	0	2	2	0	0	2	0	2	2	2	2	2	0	2	2	-1	2	2	2	2	0	0	2	2	0	2	0	0	0	0	2	2	2	0	2	0	2	0	2	2	0	0	0	0	0
AM964	488633464	488994616	361152	2	0	2	2	0	0	2	0	2	2	2	0	2	0	2	2	-1	2	2	2	2	0	0	2	2	0	2	0	0	0	0	2	2	2	0	2	0	2	0	2	2	0	0	0	0	2
AM965	488994617	489087737	93120	2	0	2	2	0	0	2	0	2	2	2	0	2	0	2	2	-1	2	2	2	2	0	0	2	2	0	2	0	0	0	0	2	2	2	0	2	0	2	0	2	2	0	0	0	0	2
AM966	489087738	489133180	45442	2	0	2	2	0	0	2	0	2	-1	2	0	2	0	2	2	-1	2	2	2	2	0	0	2	2	0	2	0	0	0	0	2	2	2	0	2	0	2	0	2	2	0	0	0	0	2
AM967	489133181	489171938	38757	2	0	-1	2	0	0	2	0	2	-1	2	0	2	0	2	2	-1	2	2	2	2	0	0	2	2	0	2	0	0	0	0	2	2	2	0	2	0	2	0	2	2	0	0	0	0	2
AM968	489171939	489235793	63854	2	0	-1	2	0	0	2	0	2	-1	2	0	2	0	2	2	-1	2	2	2	2	0	0	2	2	0	-1	0	0	0	0	2	2	2	0	2	0	2	0	2	2	0	0	0	0	2
AM969	489235794	489398077	162283	2	0	-1	2	0	0	2	0	2	-1	2	0	2	0	2	2	-1	2	2	2	2	0	0	2	2	0	-1	0	0	0	0	2	2	2	0	2	0	2	0	2	2	0	0	0	0	2
AM970	489398078	489691341	293263	2	0	-1	2	0	0	2	0	2	-1	2	0	2	0	2	2	-1	2	2	2	2	0	0	2	2	0	-1	0	0	0	0	2	2	2	0	2	0	2	0	2	2	0	0	0	0	2
AM971	489691342	489833395	142053	2	0	-1	2	0	0	2	0	2	-1	2	0	2	0	2	2	-1	2	2	2	2	0	0	2	2	0	-1	0	0	0	0	2	2	2	0	2	0	2	0	2	2	0	0	0	0	2
AM972	489833396	490324971	491575	2	0	-1	2	0	0	2	0	2	-1	2	0	2	0	2	2	-1	2	2	2	2	0	0	2	2	0	-1	0	0	0	0	2	2	2	0	2	0	2	0	2	2	0	0	0	0	2
AM973	490324972	490347952	22980	2	0	-1	2	0	0	2	0	2	-1	2	0	2	0	2	2	-1	2	2	2	2	0	0	2	2	0	-1	0	0	0	0	2	2	2	0	2	0	2	0	2	2	0	0	0	0	2
AM974	490347953	490417802	69849	2	0	-1	2	0	0	2	0	2	-1	2	0	2	0	2	2	-1	2	2	2	2	0	0	2	2	0	-1	0	0	0	0	2	2	2	0	2	0	2	0	2	2	0	0	0	0	2
AM975	490417803	490447337	29534	2	0	-1	2	0	0	2	0	2	-1	2	0	2	0	2	2	-1	2	2	2	2	0	0	2	2	0	2	0	0	0	0	2	2	2	0	2	0	2	0	2	2	0	0	0	0	2
AM976	490447338	490470597	23259	2	0	-1	2	0	0	2	0	2	-1	2	0	2	0	2	2	2	2	2	2	2	0	0	2	2	0	2	0	0	0	0	2	2	2	0	2	0	2	0	2	2	0	0	0	0	2
AM977	490470598	490504160	33562	2	0	-1	2	0	0	2	0	2	-1	2	0	2	0	2	2	2	2	2	2	2	0	0	2	2	0	2	0	0	0	0	2	2	2	0	2	0	2	0	2	2	0	0	0	0	2
AM978	490504161	490511769	7608	2	0	-1	2	0	0	2	0	2	-1	2	2	2	0	2	2	2	2	2	2	2	0	0	2	2	0	2	0	0	0	0	2	2	2	0	2	0	2	0	2	2	0	0	0	0	2
AM979	490511770	490742178	230408	2	0	-1	2	0	0	2	0	2	-1	2	2	2	0	2	2	2	2	2	2	2	0	0	2	2	0	2	0	0	0	0	2	2	2	0	2	0	2	0	2	2	0	0	0	0	2
AM980	490742179	490773970	31791	2	0	-1	2	0	0	2	0	2	-1	2	-1	2	0	2	2	2	2	2	2	2	0	0	2	2	0	2	0	0	0	0	2	2	2	0	2	0	2	0	2	2	0	0	0	0	2
AM981	490773971	490824147	50176	2	0	-1	2	0	0	2	0	2	-1	2	-1	2	0	2	2	2	2	2	2	2	0	0	2	2	0	2	0	0	0	0	2	2	2	0	2	0	2	0	2	2	0	0	0	0	2
AM982	490824148	490966717	142569	2	0	-1	2	0	0	2	0	2	-1	2	-1	2	0	2	2	2	2	2	2	2	0	0	2	2	0	2	2	0	0	0	2	2	2	0	2	0	2	0	2	2	0	0	0	0	2
AM983	490966718	491030146	63428	2	0	-1	2	0	0	2	0	2	-1	2	-1	2	0	2	2	-1	2	2	2	2	0	0	2	2	0	2	2	0	0	0	2	2	2	0	2	0	2	0	2	2	0	0	0	0	2
AM984	491030147	491206403	176256	2	0	-1	2	0	0	2	0	2	-1	2	-1	2	0	2	2	-1	2	2	2	2	0	0	2	2	0	-1	2	0	0	0	2	2	2	0	2	0	2	0	2	2	0	0	0	0	2
AM985	491206404	491218479	12075	2	0	-1	2	0	0	2	0	2	-1	2	-1	2	0	2	2	2	2	2	2	2	0	0	2	2	0	-1	2	0	0	0	2	2	2	0	2	0	2	0	2	2	0	0	0	0	2
AM986	491218480	491260415	41935	2	0	-1	2	0	0	2	0	2	-1	2	-1	2	0	2	2	2	2	2	2	2	0	0	2	2	0	-1	2	0	0	0	2	2	2	0	2	0	2	0	2	2	0	0	0	0	2
AM987	491260416	491317687	57271	2	0	-1	2	0	0	2	0	2	-1	2	-1	2	0	2	2	2	2	2	2	2	0	0	2	2	0	-1	2	0	0	0	2	2	2	0	2	0	2	0	2	2	0	0	0	0	2
AM988	491317688	491379554	61866	2	0	-1	2	0	0	2	0	2	-1	2	-1	2	0	2	2	-1	2	2	2	2	0	0	2	2	0	-1	2	0	0	0	2	2	2	0	2	0	2	0	2	2	0	0	0	0	2
AM989	491379555	491392517	12962	2	0	-1	2	0	0	2	0	2	-1	2	-1	2	0	2	2	-1	2	2	2	2	0	0	2	2	0	0	2	0	0	0	2	2	2	0	2	0	2	0	2	2	0	0	0	0	2
AM990	491392518	491751354	358836	2	0	-1	2	0	0	2	0	2	-1	2	0	2	0	2	2	-1	2	2	2	2	0	0	2	2	0	0	2	0	0	0	2	2	2	0	2	0	2	0	2	2	0	0	0	0	2
AM991	491751355	491769451	18096	2	0	-1	2	0	0	2	0	2	-1	2	0	2	0	2	2	-1	2	2	2	2	0	0	2	2	0	-1	2	0	0	0	2	2	2	0	2	0	2	0	2	2	0	0	0	0	2
AM992	491769452	491804149	34697	2	0	-1	0	0	0	2	0	2	-1	2	0	2	0	2	2	-1	2	2	2	2	0	0	2	2	0	-1	2	0	0	0	2	2	2	0	2	0	2	0	2	2	0	0	0	0	2
AM993	491804150	491908701	104551	2	0	-1	0	0	0	2	0	2	-1	2	0	2	0	2	2	2	2	2	2	2	0	0	2	2	0	-1	2	0	0	0	2	2	2	0	2	0	2	0	2	2	0	0	0	0	2
AM994	491908702	491914371	5669	2	0	-1	0	0	0	2	0	2	-1	2	0	2	0	2	2	2	2	2	2	2	0	0	2	2	0	-1	2	0	0	0	2	2	2	0	2	0	2	0	2	2	0	0	0	0	2
AM995	491914372	491940701	26329	2	0	-1	0	0	2	2	0	2	-1	2	0	2	0	2	2	2	2	2	2	2	0	0	2	2	0	-1	2	0	0	0	2	2	2	0	2	0	2	0	2	2	0	0	0	0	2
AM997	491940702	492038125	97423	2	0	-1	0	0	2	2	0	2	-1	2	2	2	0	2	2	2	2	2	2	2	0	0	2	2	0	-1	2	0	0	0	2	2	2	0	2	0	2	0	2	2	0	0	0	0	2
AM996	492038126	492198859	160733	2	0	-1	0	0	2	2	0	2	-1	2	0	2	0	2	2	2	2	2	2	2	0	0	2	2	0	-1	2	0	0	0	2	2	2	0	2	0	2	0	2	2	0	0	0	0	2
AM998	492198860	492340434	141574	2	0	-1	0	0	2	2	0	2	-1	2	0	2	0	2	2	2	2	2	2	2	0	0	2	2	0	2	2	0	0	0	2	2	2	0	2	0	2	0	2	2	0	0	0	0	2
AM999	492340435	492702195	361760	2	0	-1	0	0	2	2	0	2	-1	2	0	2	0	2	2	2	2	2	2	2	0	0	2	2	0	2	2	0	0	0	2	2	2	0	2	0	2	0	2	2	0	0	0	0	2
AM1000	492702196	492746672	44476	2	0	-1	0	0	2	2	0	2	-1	2	0	2	0	2	2	-1	2	2	2	2	0	0	2	2	0	2	2	0	0	0	2	2	2	0	2	0	2	0	2	2	0	0	0	0	2
AM1001	492746673	493431904	685231	2	0	-1	0	0	2	2	0	2	-1	2	0	2	0	2	2	-1	2	2	2	2	0	0	2	2	0	2	2	0	0	0	2	2	2	0	2	0	2	0	2	2	0	0	0	0	2
AM1002	493431905	493437366	5461	2	0	-1	0	0	2	2	0	2	-1	2	0	2	0	2	2	-1	2	2	2	2	0	0	0	2	0	2	2	0	0	0	2	2	2	0	2	0	2	0	2	2	0	0	0	0	2
AM1003	493437367	493550387	113020	2	0	-1	0	0	2	2	0	2	-1	2	0	2	0	2	2	-1	2	2	2	2	0	0	0	2	0	2	2	0	0	0	2	2	2	0	2	0	2	0	2	2	0	0	0	0	2
AM1005	493550388	493631392	81004	2	0	-1	0	0	2	2	0	2	-1	2	0	2	0	2	2	-1	2	2	2	2	0	0	0	2	0	2	2	0	0	0	2	2	2	0	2	0	2	0	2	2	0	0	0	0	2
AM1004	493631393	493741750	110357	2	0	-1	0	0	2	2	0	2	-1	2	0	2	0	2	2	-1	2	2	2	2	0	0	0	2	0	2	2	0	0	0	2	2	2	0	2	0	2	0	2	2	0	0	0	0	2
AM1006	493741751	493793548	51797	2	0	-1	0	0	2	2	0	2	-1	2	0	2	2	2	2	-1	2	2	2	2	0	0	0	2	0	2	2	0	0	0	2	2	2	0	2	0	2	0	2	2	0	0	0	0	2
AM1007	493793549	493870598	77049	2	0	-1	0	0	2	2	0	2	-1	2	0	2	2	2	2	-1	2	2	2	2	0	0	0	2	0	2	2	0	0	0	2	2	2	0	2	0	2	0	2	2	0	0	0	0	2
AM1008	493870599	494162349	291750	2	0	-1	0	0	2	2	0	2	-1	2	0	2	2	2	2	-1	2	2	2	2	0	0	0	2	0	2	2	0	0	0	2	2	2	0	2	0	2	0	2	2	0	0	0	0	2
AM1009	494162350	494235556	73206	2	0	-1	0	0	2	2	0	2	-1	2	0	2	2	2	2	-1	2	2	2	2	0	0	0	2	0	2	2	0	0	0	2	2	0	0	2	0	2	0	2	2	0	0	0	0	2
AM1010	494235557	494305470	69913	2	0	-1	0	0	2	2	0	2	-1	2	0	2	2	2	2	-1	2	2	2	2	0	0	0	2	0	-1	2	0	0	0	2	2	0	0	2	0	2	0	2	2	0	0	0	0	2
AM1011	494305471	494640271	334800	2	0	-1	0	0	2	2	0	2	-1	2	0	2	2	2	2	-1	2	2	2	2	2	0	0	2	0	-1	2	0	0	0	2	2	0	0	2	0	2	0	2	2	0	0	0	0	2
AM1012	494640272	494684136	43864	2	0	-1	0	0	2	2	0	2	-1	2	0	2	2	2	2	-1	2	2	2	2	2	0	0	2	0	-1	2	0	0	0	2	2	0	0	2	0	2	0	2	2	0	0	0	0	2
AM1013	494684137	494842836	158699	2	0	-1	0	0	2	2	0	2	-1	2	0	2	2	2	2	-1	2	2	2	2	2	0	0	2	0	-1	2	0	0	0	2	2	0	0	2	0	2	0	2	2	0	0	0	0	2
AM1014	494842837	495295915	453078	2	0	-1	0	0	2	2	0	2	-1	2	0	2	2	2	2	-1	2	2	2	2	2	0	0	2	0	2	2	0	0	0	2	2	0	0	2	0	2	0	2	2	0	0	0	0	2
AM1015	495295916	495324682	28766	2	0	-1	0	0	2	2	2	2	-1	2	0	2	2	2	2	-1	2	2	2	2	2	0	0	2	0	2	2	0	0	0	2	2	0	0	2	0	2	0	2	2	0	0	0	0	2
AM1016	495324683	495364730	40047	2	0	-1	0	0	2	2	2	2	-1	2	0	2	2	2	2	-1	2	2	2	2	2	0	0	2	0	2	2	0	0	2	2	2	0	0	2	0	2	0	2	2	0	0	0	0	2
AM1017	495364731	495472246	107515	2	0	-1	0	0	2	2	2	2	-1	2	0	2	2	2	2	-1	2	2	2	2	2	0	0	2	0	2	2	0	0	2	2	2	0	0	2	0	2	0	2	2	0	0	0	0	2
AM1018	495472247	495795819	323572	2	0	-1	0	0	2	2	2	2	-1	2	0	2	2	2	2	-1	2	2	2	2	2	0	0	2	0	2	2	0	0	2	2	2	0	0	2	0	2	0	2	2	0	0	0	0	2
AM1019	495795820	495855611	59791	2	0	-1	0	0	2	2	2	2	-1	2	-1	2	2	2	2	-1	2	2	2	2	2	0	0	2	0	2	2	0	0	2	2	2	0	0	2	0	2	0	2	2	0	0	0	0	2
AM1020	495855612	495880585	24973	2	0	-1	0	0	2	2	2	2	-1	2	-1	2	2	2	2	-1	2	2	2	2	2	0	0	2	0	2	2	0	0	2	2	2	0	0	2	0	2	0	2	2	0	0	0	0	2
AM1021	495880586	495918178	37592	2	0	-1	0	0	2	2	2	2	-1	2	-1	2	2	2	2	-1	2	2	2	0	2	0	0	2	0	2	2	0	0	2	2	2	0	0	2	0	2	0	2	2	0	0	0	0	2
AM1022	495918179	496009172	90993	2	0	-1	0	0	2	2	2	2	-1	2	0	2	2	2	2	-1	2	2	2	0	2	0	0	2	0	2	2	0	0	2	2	2	0	0	2	0	2	0	2	2	0	0	0	0	2
AM1023	496009173	496102423	93250	2	0	-1	0	0	2	2	2	2	-1	2	0	2	2	2	2	-1	2	2	2	0	2	0	0	2	0	2	2	0	0	2	2	2	0	0	2	0	2	0	2	2	0	0	0	0	2
AM1024	496102424	496116451	14027	2	0	-1	0	0	2	2	2	2	-1	2	0	2	2	2	2	-1	2	2	2	0	2	0	0	2	0	2	2	0	0	2	2	2	0	0	2	0	2	0	2	2	0	0	0	0	2
AM1025	496116452	496185899	69447	2	0	-1	0	0	2	2	2	2	-1	2	0	2	2	2	2	-1	2	2	2	0	2	0	0	2	0	2	2	0	0	2	2	2	0	0	2	0	2	0	0	2	0	0	0	0	2
AM1026	496185900	496448707	262807	2	0	-1	0	0	2	2	2	2	-1	2	0	2	2	2	2	-1	2	2	2	0	2	0	0	2	0	2	2	0	0	2	2	2	0	0	2	0	2	0	0	2	0	0	0	0	2
AM1027	496448708	496482853	34145	2	0	-1	0	0	2	2	2	2	-1	2	0	2	2	2	2	-1	2	2	2	0	2	0	0	2	0	2	2	0	0	2	2	2	0	0	2	0	2	0	0	2	0	0	0	0	2
AM1029	496482854	496505273	22419	2	0	-1	0	0	2	2	2	2	-1	2	0	2	2	2	0	-1	2	2	2	0	2	0	0	2	0	2	2	0	0	2	2	2	0	0	2	0	2	0	0	2	0	0	0	0	2
AM1028	496505274	496677292	172018	2	0	-1	0	0	2	2	2	2	-1	2	0	2	2	2	0	-1	2	2	2	0	2	0	0	2	0	2	2	0	0	2	2	2	0	0	2	0	2	0	0	2	0	0	0	0	2
AM1030	496677293	496909440	232147	2	0	-1	0	0	2	2	2	2	-1	2	0	2	2	2	0	-1	2	2	2	0	2	0	0	2	0	2	2	0	0	2	2	2	0	0	2	0	2	0	0	2	0	0	0	0	2
AM1031	496909441	496968283	58842	2	0	-1	0	0	2	2	2	2	-1	2	0	2	2	2	0	-1	2	2	2	0	2	0	0	2	0	2	2	0	0	2	2	2	0	0	2	0	2	0	0	0	0	0	0	0	2
AM1032	496968284	497225573	257289	2	0	-1	0	0	2	2	2	2	-1	2	0	2	2	2	0	-1	2	2	2	0	2	0	0	2	0	2	2	0	0	2	2	2	0	0	2	0	2	0	0	0	0	0	0	0	2
AM1033	497225574	497520463	294889	2	0	-1	0	0	2	2	2	2	-1	2	0	2	2	2	0	-1	2	2	2	0	2	0	0	2	0	2	2	0	0	2	2	2	0	0	2	0	2	0	0	0	0	0	0	0	2
AM1034	497520464	497637989	117525	2	0	-1	0	0	2	2	2	2	-1	2	-1	2	2	2	0	-1	2	2	2	0	2	0	0	2	0	2	2	0	0	2	2	2	0	0	2	0	2	0	0	0	0	0	0	0	2
AM1035	497637990	497795923	157933	2	0	-1	0	0	2	2	2	2	-1	2	-1	2	2	2	0	-1	2	2	2	0	2	0	0	2	0	2	2	0	0	2	2	2	0	0	2	0	2	0	0	0	0	0	0	0	2
AM1036	497795924	497811506	15582	2	0	-1	0	0	2	2	2	2	-1	2	0	2	2	2	0	-1	2	2	2	0	2	0	0	2	0	2	2	0	0	2	2	2	0	0	2	0	2	0	0	0	0	0	0	0	2
AM1037	497811507	497881749	70242	2	0	-1	0	0	2	2	2	2	-1	2	0	2	2	2	0	-1	2	2	2	0	2	0	0	2	0	2	2	0	0	2	2	2	0	0	2	0	2	0	0	0	0	0	0	0	2
AM1038	497881750	497932132	50382	2	0	-1	0	0	2	2	2	2	2	2	0	2	2	2	0	-1	2	2	2	0	2	0	0	2	0	2	2	0	0	2	2	2	0	0	2	0	2	0	0	0	0	0	0	0	2
AM1039	497932133	498098974	166841	2	0	-1	0	0	2	2	2	2	2	2	0	2	2	2	0	-1	2	2	2	0	2	0	0	2	0	2	2	0	0	2	2	2	0	0	2	0	2	0	0	0	0	0	0	0	2
AM1040	498098975	498362709	263734	2	0	-1	0	0	2	2	2	2	2	2	0	2	2	2	0	-1	2	2	2	0	2	0	0	2	0	2	2	0	0	2	2	2	0	0	2	0	2	0	0	0	0	0	0	0	2
AM1041	498362710	498422103	59393	2	0	-1	0	0	2	2	2	2	2	2	0	2	2	2	0	-1	2	2	2	0	2	0	0	2	0	2	2	0	0	2	2	2	0	0	2	0	2	0	0	0	0	0	0	0	2
AM1043	498422104	498811910	389806	2	0	-1	0	0	2	2	2	2	2	2	0	2	2	2	0	-1	2	2	2	0	2	0	0	2	0	2	2	0	0	2	2	2	0	0	2	0	2	0	0	0	0	0	0	0	2
AM1042	498811911	498999764	187853	2	0	-1	0	0	2	2	2	2	2	2	0	2	2	2	0	-1	2	2	2	0	2	0	0	2	0	2	2	0	0	2	2	2	0	0	2	0	2	0	0	0	0	0	0	0	2
AM1044	498999765	499096883	97118	2	0	-1	0	0	2	2	2	2	2	2	0	2	2	2	0	-1	2	2	2	0	2	0	0	2	0	2	2	0	0	2	2	2	0	0	2	0	2	0	0	0	0	0	0	0	2
AM1045	499096884	499141470	44586	2	0	-1	0	0	2	2	2	2	2	2	0	2	2	2	0	-1	2	2	2	0	2	0	0	2	0	2	2	0	0	2	2	2	0	0	2	0	2	0	0	0	0	0	0	0	2
AM1046	499141471	499166968	25497	2	0	-1	0	0	2	2	2	2	2	2	0	2	2	2	0	-1	2	2	2	0	2	0	0	2	0	2	2	0	0	2	2	2	0	0	2	0	2	0	0	0	0	0	0	0	2
AM1047	499166969	499265041	98072	2	0	-1	0	0	2	2	2	2	2	2	0	2	2	2	0	-1	2	2	2	0	2	0	0	2	0	2	2	0	0	2	2	2	0	0	2	0	2	0	0	0	0	0	0	0	2
AM1048	499265042	499286840	21798	2	0	-1	0	0	2	2	2	2	2	2	0	2	2	2	0	-1	-1	2	2	0	2	0	0	2	0	2	2	0	0	2	2	2	0	0	2	0	2	0	0	0	0	0	0	0	2
AM1049	499286841	499314351	27510	2	0	-1	0	0	2	2	2	2	2	2	0	2	2	2	0	-1	-1	2	2	0	2	0	0	2	0	2	2	0	0	2	2	2	0	0	2	0	2	0	0	0	0	0	0	0	2
AM1050	499314352	499383221	68869	2	0	-1	0	0	2	2	2	2	2	2	0	2	2	2	0	-1	-1	2	2	0	2	0	0	2	0	2	2	0	0	2	2	2	0	0	2	0	2	0	0	0	0	0	0	0	2
AM1051	499383222	499707759	324537	2	0	-1	0	0	2	2	2	2	2	2	0	2	2	2	0	-1	-1	2	2	0	2	0	0	2	0	2	2	0	0	2	2	2	0	0	2	0	2	0	0	0	0	0	0	0	2
AM1052	499707760	499879127	171367	2	0	-1	0	0	2	2	2	2	2	2	0	2	2	2	0	-1	-1	2	2	0	2	0	0	2	0	2	2	0	0	2	2	2	0	0	2	0	2	0	0	0	0	0	0	0	2
AM1053	499879128	500172964	293836	2	0	-1	0	0	2	2	2	2	2	2	0	2	2	2	0	-1	2	2	2	0	2	0	0	2	0	2	2	0	0	2	2	2	0	0	2	0	2	0	0	0	0	0	0	0	2
AM1054	500172965	500245341	72376	2	0	-1	0	0	2	2	2	2	2	2	0	2	2	2	0	-1	2	2	2	0	2	0	0	2	0	2	2	0	0	2	2	2	0	0	2	0	2	0	0	0	0	0	0	0	2
AM1055	500245342	500455219	209877	2	0	-1	0	0	2	2	2	2	2	2	0	-1	2	2	0	-1	2	2	2	0	2	0	0	2	0	2	2	0	0	2	2	2	0	0	2	0	2	0	0	0	0	0	0	0	2
AM1056	500455220	500834001	378781	2	0	-1	0	0	2	2	2	2	2	2	0	-1	2	2	0	-1	2	2	2	0	2	0	0	2	0	2	2	0	0	2	2	2	0	0	2	0	2	0	0	0	0	0	0	0	2
AM1057	500834002	500932493	98491	2	0	-1	0	0	2	2	2	2	2	2	0	-1	2	2	0	-1	2	2	2	0	2	0	0	2	0	2	2	0	0	2	2	2	0	0	2	0	2	0	0	0	0	2	0	0	2
AM1058	500932494	501143471	210977	2	0	-1	0	0	2	2	2	2	2	2	0	2	2	2	0	-1	2	2	2	0	2	0	0	2	0	2	2	0	0	2	2	2	0	0	2	0	2	0	0	0	0	2	0	0	2
AM1059	501143472	501380716	237244	2	0	-1	0	0	2	2	2	2	2	2	0	2	2	2	0	-1	2	2	2	0	2	0	0	2	0	2	2	0	0	2	2	2	0	0	2	2	2	0	0	0	0	2	0	0	2
AM1060	501380717	501399689	18972	2	0	-1	0	0	2	2	2	2	2	2	0	2	2	2	0	-1	2	2	2	0	2	0	0	2	0	2	2	0	0	2	2	2	0	0	2	2	2	0	0	0	0	2	0	0	2
AM1061	501399690	501557540	157850	2	0	-1	0	0	2	2	2	2	2	2	0	2	2	2	0	-1	2	2	2	0	2	0	0	2	0	2	2	0	0	2	2	2	0	0	2	2	2	0	0	0	0	2	0	0	2
AM1062	501557541	501728106	170565	2	0	-1	0	0	2	2	2	2	2	2	0	2	2	2	0	-1	2	2	2	0	2	0	0	2	0	2	2	0	0	2	2	2	0	0	2	2	2	0	0	0	0	2	0	0	2
AM1063	501728107	501819540	91433	2	0	-1	0	0	2	2	2	2	2	2	0	2	2	2	0	-1	2	2	2	0	2	0	0	2	0	2	2	0	0	2	2	2	0	0	2	2	2	0	0	0	0	2	0	0	2
AM1064	501819541	501844178	24637	2	0	-1	0	0	2	2	2	2	2	2	0	2	2	2	0	-1	2	2	2	0	2	0	0	2	0	2	2	0	0	2	2	2	0	0	2	2	2	0	0	0	0	2	0	0	2
AM1065	501844179	501931909	87730	2	0	-1	0	0	2	2	2	2	2	2	0	2	2	2	0	-1	2	2	2	0	2	0	0	2	0	2	2	0	0	2	2	2	0	0	2	2	2	0	0	0	0	2	0	0	2
AM1069	501931910	502059396	127486	2	0	-1	0	0	2	2	2	2	2	2	0	2	2	2	0	-1	-1	2	2	0	2	0	0	2	0	2	2	0	0	2	2	2	0	0	2	2	2	0	0	0	0	2	0	0	2
AM1070	502059397	502141327	81930	2	0	-1	0	0	2	2	2	2	2	2	0	2	2	2	0	-1	-1	2	2	0	2	0	0	2	0	2	2	0	0	2	2	2	0	0	2	2	2	0	0	0	0	2	0	0	2
AM1067	502141328	502174456	33128	2	0	-1	0	0	2	2	2	2	2	2	0	2	2	2	0	-1	2	2	2	0	2	0	0	2	0	2	2	0	0	2	2	2	0	0	2	2	2	0	0	0	0	2	0	0	2
AM1066	502174457	502521922	347465	2	0	-1	0	0	2	2	2	2	2	2	0	2	2	2	0	-1	2	2	2	0	2	0	0	2	0	2	2	0	0	2	2	2	0	0	2	2	2	0	0	0	0	2	0	0	2
AM1071	502521923	502543305	21382	2	0	-1	0	0	2	2	2	2	2	2	0	2	2	2	0	-1	-1	2	2	0	2	0	0	2	0	2	2	0	0	2	2	2	0	0	2	2	2	0	0	0	0	2	0	0	2
AM1068	502543306	502631538	88232	2	0	-1	0	0	2	2	2	2	2	2	0	2	2	2	0	-1	-1	2	2	0	2	0	0	2	0	2	2	0	0	2	2	2	0	0	2	2	2	0	0	0	0	2	0	0	2
AM1072	502631539	502979244	347705	2	0	-1	0	0	2	2	2	2	2	2	0	2	2	2	0	-1	2	2	2	0	2	0	0	2	0	2	2	0	0	2	2	2	0	0	2	2	2	0	0	0	0	2	0	0	2
AM1073	502979245	502989903	10658	2	0	-1	0	0	2	2	2	2	2	2	0	2	2	2	0	-1	2	2	2	0	2	0	0	2	0	2	2	0	0	2	2	2	0	0	2	2	2	0	0	0	0	2	0	0	2
AM1074	502989904	503029783	39879	2	0	-1	0	0	2	2	2	2	2	2	0	2	2	2	0	-1	-1	2	2	0	2	0	0	2	0	2	2	0	0	2	2	2	0	0	2	2	2	0	0	0	0	2	0	0	2
AM1075	503029784	503168424	138640	2	0	-1	0	0	2	2	2	2	2	2	0	2	2	2	0	-1	-1	2	2	0	2	0	0	2	0	2	2	0	0	2	2	2	0	0	2	2	2	0	0	0	0	2	0	0	2
AM1076	503168425	503188501	20076	2	0	-1	0	0	2	2	2	2	2	2	0	2	2	2	0	-1	2	2	2	0	2	0	0	2	0	2	2	0	0	2	2	2	0	0	2	2	2	0	0	0	0	2	0	0	2
AM1077	503188502	503238040	49538	2	0	-1	0	0	2	2	2	2	2	2	0	2	2	2	0	-1	2	2	2	0	2	0	0	2	0	2	2	0	0	2	2	2	0	0	2	2	2	0	0	0	0	2	0	0	2
AM1078	503238041	503265626	27585	2	0	-1	0	0	2	2	2	2	2	2	0	2	2	2	0	-1	2	2	2	0	2	0	0	2	0	2	2	0	0	2	2	2	0	0	2	2	2	0	0	0	0	2	0	0	2
AM1079	503265627	503322948	57321	2	0	-1	0	0	2	2	2	2	2	2	0	2	2	2	0	-1	2	2	2	0	2	0	0	2	0	2	2	0	0	2	2	2	0	0	2	2	2	0	0	0	0	2	0	0	2
AM1080	503322949	503373590	50641	2	0	-1	0	0	2	2	2	2	2	2	0	2	2	2	0	-1	2	2	2	0	2	0	0	2	0	2	2	0	0	2	2	2	0	0	2	2	2	0	0	0	0	2	0	0	2
AM1081	503373591	503435183	61592	2	0	-1	0	0	2	2	2	2	2	2	0	2	2	2	0	-1	2	2	2	0	2	0	0	2	0	2	2	0	0	2	2	2	0	0	2	2	2	0	0	0	0	2	0	0	2
AM1082	503435184	503530323	95139	2	0	-1	0	2	2	2	2	2	2	2	0	2	2	2	0	-1	2	2	2	0	2	0	0	2	0	2	2	0	0	2	2	2	0	0	2	2	2	0	0	0	0	2	0	0	2
AM1083	503530324	503560353	30029	2	0	-1	0	2	2	2	2	2	2	2	0	2	2	2	0	-1	2	2	2	0	2	0	0	2	0	2	2	0	0	2	2	2	0	0	2	2	2	0	0	0	0	2	0	0	2
AM1084	503560354	503679688	119334	2	0	-1	0	2	2	2	2	2	2	2	0	2	2	2	0	-1	2	2	2	0	2	0	0	2	0	2	2	0	0	2	2	2	0	0	2	2	2	0	0	0	0	2	0	0	2
AM1085	503679689	503703081	23392	2	0	-1	0	2	2	2	2	2	2	2	0	2	2	2	0	-1	2	2	2	0	2	0	0	2	0	2	2	0	0	2	2	2	0	0	2	2	2	0	0	0	0	2	0	0	2
AM1086	503703082	503717489	14407	2	0	-1	0	2	2	2	2	2	2	2	0	2	2	2	0	-1	2	2	2	0	2	0	0	2	0	2	2	0	0	2	2	2	0	0	2	2	2	0	0	0	0	2	0	0	2
AM1087	503717490	503955916	238426	2	0	-1	0	2	2	2	2	2	2	2	0	2	2	2	0	-1	2	2	2	0	2	0	0	2	0	2	2	0	0	2	2	2	0	0	2	2	2	0	0	0	0	2	0	0	2
AM1088	503955917	504406441	450524	2	0	-1	0	2	2	2	2	2	2	2	0	2	2	2	0	-1	2	2	2	0	2	0	0	2	0	2	2	0	0	2	2	2	0	0	2	2	2	0	0	0	0	2	0	0	2
AM1089	504406442	504680063	273621	2	0	-1	0	2	2	2	2	2	2	2	0	2	2	2	0	-1	2	2	2	0	2	0	0	2	0	2	2	0	0	2	2	2	0	0	2	2	2	0	0	0	0	2	0	0	2
AM1090	504680064	504892509	212445	2	0	-1	0	2	2	2	2	2	2	2	0	2	2	2	0	-1	2	2	2	0	2	0	0	2	0	2	2	0	0	2	2	2	0	0	2	2	2	0	0	0	0	2	0	0	2
AM1091	504892510	505144201	251691	2	0	-1	0	2	2	2	2	2	2	2	0	2	2	2	0	-1	2	2	2	0	2	0	0	2	0	2	2	0	0	2	2	2	0	0	2	2	2	0	0	0	0	2	0	0	2
AM1092	505144202	505183236	39034	2	0	-1	0	2	2	2	2	2	2	2	0	2	2	2	0	-1	2	2	2	0	2	0	0	2	0	2	2	0	0	2	2	2	0	0	2	2	2	0	0	0	0	2	0	0	2
AM1093	505183237	505281500	98263	2	0	-1	0	2	2	2	2	2	2	2	0	2	2	2	0	-1	2	2	2	0	2	0	0	2	0	2	2	0	0	2	2	2	0	0	2	2	2	0	0	0	0	2	0	0	2
AM1094	505281501	505311813	30312	2	0	-1	0	2	2	2	2	2	2	2	0	2	2	2	0	-1	2	2	2	0	2	0	0	2	0	2	2	0	0	2	2	2	0	0	2	2	2	0	0	0	2	2	0	0	2
AM1095	505311814	505339567	27753	2	0	-1	0	2	2	2	2	2	0	2	0	2	2	2	0	-1	2	2	2	0	2	0	0	2	0	2	2	0	0	2	2	2	0	0	2	2	2	0	0	0	2	2	0	0	2
AM1096	505339568	505413066	73498	2	0	-1	0	2	2	2	2	2	0	2	0	2	2	2	0	-1	2	2	2	0	2	0	0	2	0	2	2	0	0	2	2	2	0	0	2	2	2	2	0	0	2	2	0	0	2
AM1097	505413067	505456402	43335	2	0	-1	0	2	2	2	2	2	0	2	0	2	2	2	0	-1	2	2	2	0	2	0	0	2	0	2	2	0	0	2	2	2	0	0	2	2	2	2	0	0	2	2	0	0	2
AM1098	505456403	505507632	51229	2	0	-1	0	2	2	2	2	2	0	2	0	2	2	2	0	-1	2	2	2	0	2	0	0	2	0	2	2	0	0	2	2	2	0	0	2	2	2	2	0	0	2	2	0	0	2
AM1099	505507633	506039946	532313	2	0	-1	0	2	2	2	2	2	0	2	0	2	2	2	0	-1	2	2	2	0	2	0	0	2	0	2	2	0	0	2	2	2	0	0	2	2	2	2	0	0	2	2	0	-1	2
AM1100	506039947	506185897	145950	2	0	-1	0	2	2	2	2	2	0	2	0	2	2	2	0	-1	2	2	2	0	2	0	0	2	0	2	2	0	0	2	2	2	0	0	2	2	2	2	0	0	2	2	0	-1	2
AM1101	506185898	506222323	36425	2	0	-1	0	2	2	2	2	2	0	2	0	2	2	2	0	-1	2	2	2	0	2	0	0	2	0	2	2	0	0	2	2	2	0	0	2	2	2	2	0	0	2	2	0	-1	2
AM1102	506222324	506426068	203744	2	0	-1	0	2	2	2	2	2	0	2	0	2	2	2	0	-1	2	2	2	0	2	0	0	2	0	2	2	0	0	2	2	2	0	0	2	2	2	2	0	0	2	2	0	-1	2
AM1103	506426069	506462811	36742	2	0	-1	0	2	2	2	2	2	0	2	0	2	2	2	0	-1	2	2	2	0	2	0	0	2	0	2	2	0	0	2	2	2	0	0	2	2	2	2	0	0	2	2	0	-1	2
AM1104	506462812	506476364	13552	2	2	-1	0	2	2	2	2	2	0	2	0	2	2	2	0	-1	2	2	2	0	2	0	0	2	0	2	2	0	0	2	2	2	0	0	2	2	2	2	0	0	2	2	0	-1	2
AM1105	506476365	506498927	22562	2	2	-1	0	2	2	2	2	2	0	2	0	2	2	2	0	-1	2	2	2	0	2	0	0	2	0	2	2	0	0	2	2	2	0	0	2	2	2	2	0	0	2	2	0	-1	2
AM1106	506498928	506518816	19888	2	2	-1	0	2	2	2	2	2	0	2	0	2	2	2	0	-1	2	2	2	0	2	0	0	2	0	0	2	0	0	2	2	2	0	0	2	2	2	2	0	0	2	2	0	-1	2
AM1107	506518817	506524433	5616	2	2	-1	0	2	2	2	2	2	0	2	0	2	2	2	0	-1	2	2	2	0	2	0	0	2	0	0	2	0	0	2	2	2	0	0	2	2	2	2	0	0	2	2	0	-1	2
AM1108	506524434	506553588	29154	2	2	-1	0	2	2	2	2	2	0	2	0	2	2	2	0	-1	2	2	2	0	2	0	0	2	0	0	2	0	0	2	2	2	0	0	2	2	2	2	0	0	2	2	0	-1	2
AM1109	506553589	506654671	101082	2	2	-1	0	2	2	2	2	2	0	2	0	2	2	2	0	-1	2	2	2	0	2	0	0	2	0	0	2	0	0	2	2	2	0	0	2	2	2	2	0	0	2	2	0	-1	2
AM1110	506654672	506664728	10056	2	2	-1	0	2	2	2	2	2	0	2	0	2	2	2	0	-1	2	2	2	0	2	0	0	2	0	0	2	0	0	2	2	2	0	0	2	2	2	2	0	0	2	2	0	-1	2
AM1111	506664729	506756019	91290	2	2	-1	0	2	2	2	2	2	0	2	0	2	2	2	0	-1	2	2	2	0	2	0	0	2	0	0	2	0	0	2	2	2	0	0	2	2	2	2	0	0	2	2	0	-1	2
AM1112	506756020	506774238	18218	2	2	-1	0	2	2	2	2	2	0	2	-1	2	2	2	0	-1	2	2	2	0	2	0	0	2	0	0	2	0	0	2	2	2	0	0	2	2	2	2	0	0	2	2	0	-1	2
AM1113	506774239	506830068	55829	2	2	-1	0	2	2	2	2	2	0	2	-1	2	2	2	0	-1	2	2	2	0	2	0	0	2	0	-1	2	0	0	2	2	2	0	0	2	2	2	2	0	0	2	2	0	-1	2
AM1114	506830069	506836474	6405	2	2	-1	0	2	2	2	2	2	0	2	-1	2	2	2	0	-1	2	2	2	0	2	0	0	2	0	-1	2	0	0	2	2	2	0	0	2	2	2	2	0	0	2	2	0	-1	2
AM1115	506836475	507035093	198618	2	2	-1	0	2	2	2	2	2	0	2	-1	2	2	2	0	2	2	2	2	0	2	0	0	2	0	-1	2	0	0	2	2	2	0	0	2	2	2	2	0	0	2	2	0	-1	2
AM1116	507035094	507365123	330029	2	2	-1	0	2	2	2	2	2	0	2	-1	2	2	2	0	2	2	2	2	0	2	0	0	2	0	-1	2	0	0	2	2	2	0	0	2	2	2	2	0	0	2	2	0	-1	2
AM1117	507365124	507735472	370348	2	2	-1	0	2	2	2	2	2	0	2	-1	2	2	2	0	2	2	2	2	0	2	0	0	2	0	-1	2	0	0	2	2	2	0	0	2	2	2	2	0	0	2	2	0	-1	2
AM1118	507735473	507747198	11725	2	2	-1	0	2	2	2	2	2	0	2	0	2	2	2	0	-1	2	2	2	0	2	0	0	2	0	-1	2	0	0	2	2	2	0	0	2	2	2	2	0	0	2	2	0	-1	2
AM1119	507747199	507900381	153182	2	2	-1	0	2	2	2	2	2	0	2	0	2	2	2	0	-1	2	2	2	0	2	0	0	2	0	-1	2	0	0	2	2	2	0	0	2	2	2	2	0	0	2	2	0	-1	2
AM1120	507900382	508006251	105869	2	2	-1	0	2	2	2	2	2	0	2	0	2	2	2	0	-1	2	2	2	0	2	0	0	2	0	2	2	0	0	2	2	2	0	0	2	2	2	2	0	0	2	2	0	-1	2
AM1121	508006252	508065149	58897	2	2	-1	0	2	2	2	2	2	0	2	0	2	2	2	0	-1	2	2	2	0	2	0	0	2	0	2	2	0	0	2	2	2	0	0	2	2	2	2	0	0	2	2	0	-1	2
AM1122	508065150	508176864	111714	2	2	-1	0	2	2	2	2	2	0	2	0	2	2	2	0	-1	2	2	2	0	2	0	0	2	0	2	2	0	0	2	2	2	0	0	2	2	2	2	0	2	2	2	0	-1	2
AM1123	508176865	508200081	23216	2	2	-1	0	2	2	2	2	2	0	2	0	2	2	2	0	-1	2	2	2	0	2	0	0	2	0	2	2	0	0	2	2	2	0	0	2	2	2	2	0	2	2	2	0	-1	2
AM1124	508200082	508227988	27906	2	2	-1	0	2	2	2	2	2	0	2	0	2	2	2	0	-1	2	2	2	0	2	0	0	2	0	0	2	0	0	2	2	2	0	0	2	2	2	2	0	2	2	2	0	-1	2
AM1125	508227989	508293668	65679	2	2	-1	0	2	2	2	2	2	0	2	0	2	2	2	0	-1	2	2	2	0	2	0	0	2	0	0	2	0	0	2	2	2	0	0	2	2	2	2	0	2	2	2	0	-1	2
AM1126	508293669	508336993	43324	2	2	-1	0	2	2	2	2	2	0	2	0	2	2	2	0	-1	2	2	2	0	2	0	0	2	0	0	2	0	0	2	2	2	0	0	2	2	2	2	0	2	2	2	0	-1	2
AM1127	508336994	508357934	20940	2	2	-1	0	2	2	2	2	0	0	2	0	2	2	2	0	-1	2	2	2	0	2	0	0	2	0	0	2	0	0	2	2	2	0	0	2	2	2	2	0	2	2	2	0	0	2
AM1128	508357935	508445335	87400	2	2	-1	0	2	2	2	2	0	0	2	0	2	2	2	0	-1	2	2	2	0	2	0	0	2	0	0	2	0	0	2	2	2	0	0	2	2	2	2	0	2	2	2	0	0	2
AM1129	508445336	508741737	296401	2	2	-1	0	2	2	2	2	0	0	2	0	2	2	2	0	-1	2	2	2	0	2	0	0	2	0	0	2	0	0	2	2	2	0	0	2	2	2	2	0	2	2	2	0	-1	2
AM1130	508741738	509238757	497019	2	2	-1	0	2	2	2	2	0	0	2	0	2	2	2	0	-1	2	2	2	0	2	0	0	2	0	0	2	0	0	2	2	2	0	0	2	2	2	2	0	2	2	2	0	-1	2
AM1131	509238758	509259162	20404	2	2	-1	0	2	2	2	2	0	0	2	0	2	2	2	0	-1	2	2	2	0	2	0	0	2	0	0	2	0	0	2	2	2	0	0	2	2	2	2	0	2	2	2	0	-1	2
AM1132	509259163	509293290	34127	2	2	-1	0	2	2	2	2	0	0	2	0	2	2	2	0	-1	2	2	2	0	2	0	0	2	0	0	2	0	0	2	2	2	0	0	2	2	2	2	0	2	2	2	0	-1	2
AM1133	509293291	509801451	508160	2	2	-1	0	2	2	2	2	0	0	2	0	2	2	2	0	-1	2	2	2	0	2	0	0	2	0	0	2	0	0	2	2	2	0	0	2	2	0	2	0	2	2	2	0	-1	2
AM1134	509801452	509812893	11441	2	2	-1	0	2	2	2	2	0	0	2	0	2	2	2	0	-1	2	2	2	0	2	0	0	2	0	-1	2	0	0	2	2	2	0	0	2	2	0	2	0	2	2	2	0	-1	2
AM1135	509812894	510005822	192928	2	2	-1	0	2	2	2	2	0	0	2	0	2	2	2	0	-1	2	2	2	0	2	0	0	2	0	-1	2	0	0	2	2	2	0	0	2	2	0	2	0	2	2	2	0	-1	2
AM1136	510005823	510013823	8000	2	2	-1	0	2	2	2	2	0	0	2	0	2	2	2	0	-1	2	2	2	0	2	0	0	2	0	-1	2	0	0	2	2	2	0	0	2	2	0	2	0	2	2	2	0	-1	2
AM1137	510013824	510050342	36518	2	2	-1	0	2	2	2	2	0	0	2	0	2	2	2	0	-1	2	2	2	0	2	0	0	2	0	-1	2	0	0	2	2	2	0	0	2	2	-1	2	0	2	2	2	0	-1	2
AM1138	510050343	510228224	177881	2	2	2	0	2	2	2	2	0	0	2	0	2	2	2	0	2	2	2	2	0	2	0	0	2	0	-1	2	0	0	2	2	2	0	0	2	2	-1	2	0	2	2	2	0	-1	2
AM1139	510228225	510296557	68332	2	2	2	0	2	2	2	2	0	0	2	0	2	2	2	0	2	2	2	2	0	2	0	0	2	0	-1	2	0	0	2	2	2	0	0	2	2	-1	2	0	2	2	2	0	-1	2
AM1140	510296558	510342876	46318	2	2	2	0	2	2	2	2	0	0	2	0	2	2	2	0	-1	2	2	2	0	2	0	0	2	0	0	2	0	0	2	2	2	0	0	2	2	0	2	0	2	2	2	0	-1	2
AM1141	510342877	510481748	138871	2	2	2	0	2	2	2	2	0	0	2	0	2	2	2	0	-1	2	0	0	0	2	0	0	2	0	0	2	0	0	2	2	2	0	0	2	2	0	2	0	2	2	2	0	-1	2
AM1142	510481749	510491252	9503	2	2	2	0	2	2	2	2	0	0	2	2	2	2	2	0	-1	2	0	0	0	2	0	0	2	0	0	2	0	0	2	2	2	0	0	2	2	0	2	0	2	2	2	0	-1	2
AM1143	510491253	510500436	9183	2	2	2	0	2	2	2	2	0	0	2	2	2	2	2	0	-1	2	0	0	0	2	0	0	2	0	2	2	0	0	2	2	2	0	0	2	2	0	2	0	2	2	2	0	-1	2
AM1144	510500437	511089038	588601	2	2	2	0	2	2	2	2	0	0	2	2	2	2	2	0	-1	2	0	0	0	2	0	0	2	0	2	2	0	0	2	2	2	0	0	2	2	0	2	0	2	2	2	0	-1	2
AM1145	511089039	511633729	544690	2	2	2	0	2	2	2	2	0	0	2	2	2	2	2	0	-1	2	0	0	0	2	0	0	2	0	2	2	0	0	2	2	2	0	0	2	2	0	2	0	2	2	2	0	-1	2
AM1146	511633730	511834686	200956	2	2	2	0	2	2	2	2	0	0	2	2	2	2	2	0	-1	2	0	0	0	2	0	0	2	0	2	2	0	0	2	2	2	0	0	2	2	0	2	0	2	2	2	0	2	2
AM1147	511834687	511866161	31474	2	2	2	0	2	2	2	2	0	0	2	2	2	2	2	0	2	2	0	0	0	2	0	0	2	0	2	2	0	0	2	2	2	0	0	2	2	0	2	0	2	2	2	0	2	2
AM1148	511866162	511926151	59989	2	2	2	0	2	2	2	2	0	0	2	2	2	2	2	0	2	2	0	0	0	2	0	0	2	0	2	2	0	0	2	2	2	0	0	2	2	0	2	0	2	2	2	0	2	2
AM1149	511926152	511960076	33924	2	2	2	0	2	2	2	2	0	0	2	2	2	2	2	0	2	2	0	0	0	2	0	0	2	0	2	2	0	0	2	2	2	0	0	2	2	0	2	0	2	2	2	0	2	2
AM1150	511960077	512388564	428487	2	2	2	0	2	2	2	2	0	0	2	2	2	2	2	0	2	2	0	0	0	2	0	0	2	0	2	2	0	0	2	2	2	0	0	0	2	0	2	0	2	2	2	0	2	2
AM1151	512388565	512556626	168061	2	0	2	0	2	2	2	2	0	0	2	2	2	2	2	0	2	2	0	0	0	2	0	0	2	0	0	2	0	0	2	2	2	0	0	0	2	0	2	0	2	2	2	0	2	2
AM1152	512556627	512655410	98783	2	0	2	0	2	2	2	2	0	0	2	2	2	2	2	0	-1	2	0	0	0	2	0	0	2	0	0	2	0	0	2	2	2	0	0	0	2	0	2	0	2	2	2	0	2	2
AM1153	512655411	512808540	153129	2	0	2	0	2	2	2	2	0	0	2	2	2	2	2	0	-1	2	0	0	0	2	0	0	2	0	0	2	0	0	2	2	2	0	0	0	2	0	2	0	2	2	2	0	2	2
AM1154	512808541	512849871	41330	2	0	2	0	2	2	2	2	0	0	2	2	2	2	2	0	-1	2	0	0	0	2	0	0	2	0	0	2	0	0	2	2	2	0	0	0	2	0	2	0	2	2	2	0	-1	2
AM1155	512849872	512934796	84924	2	0	2	0	2	2	2	2	0	0	2	2	2	2	2	0	2	2	0	0	-1	2	0	0	2	0	0	2	0	0	2	2	2	0	0	0	2	0	2	0	2	2	2	0	-1	2
AM1156	512934797	513050368	115571	2	0	2	0	2	2	2	2	0	0	2	2	2	2	2	0	2	2	0	0	-1	2	0	0	2	0	-1	2	0	0	2	2	2	0	0	0	2	0	2	0	2	2	2	0	-1	2
AM1157	513050369	513217604	167235	2	0	2	0	2	2	2	2	0	0	2	2	2	2	2	0	2	2	0	0	-1	2	0	0	2	0	-1	2	0	0	2	2	2	0	0	0	2	0	2	0	2	2	2	0	-1	2
AM1158	513217605	513238136	20531	2	0	2	0	2	2	2	2	0	0	2	2	2	2	2	0	-1	2	0	0	-1	2	0	0	2	0	-1	2	0	0	2	2	2	0	0	0	2	0	2	0	2	2	2	0	-1	2
AM1159	513238137	513342425	104288	2	0	2	0	2	2	2	2	0	0	2	2	2	2	2	0	-1	2	0	0	-1	2	0	0	2	0	-1	2	0	0	2	2	2	0	0	0	2	0	2	0	2	2	2	0	-1	2
AM1160	513342426	513363994	21568	2	0	2	0	2	2	2	2	0	0	2	2	2	2	2	0	-1	2	0	0	-1	2	0	0	2	0	-1	2	0	0	2	2	2	0	0	0	2	0	2	0	2	2	2	0	-1	2
AM1161	513363995	513762256	398261	2	0	2	0	2	2	2	2	0	0	2	2	2	2	2	0	2	2	0	0	-1	2	0	0	2	0	0	2	0	0	2	2	2	0	0	0	2	0	2	0	2	2	2	0	-1	2
AM1162	513762257	513801818	39561	2	0	2	0	2	2	2	2	0	0	2	2	2	2	2	0	2	2	0	0	-1	2	0	0	2	0	0	2	0	0	2	2	2	0	0	0	2	0	2	0	2	2	2	0	-1	2
AM1163	513801819	514251131	449312	2	0	2	0	2	2	2	2	0	0	2	2	2	2	2	0	2	2	0	0	-1	2	0	0	2	0	0	2	0	0	2	2	2	0	0	0	2	0	2	0	2	2	2	0	-1	2
AM1166	514251132	514322336	71204	2	0	2	0	2	2	2	2	0	0	2	2	2	2	2	0	2	2	0	0	-1	2	0	0	2	0	2	2	0	0	2	2	2	0	0	0	2	0	2	0	2	2	2	0	-1	2
AM1164	514322337	514716923	394586	2	0	2	0	2	2	2	2	0	0	2	2	2	2	2	0	2	2	0	0	-1	2	0	0	2	0	2	2	0	0	2	2	2	0	0	0	2	0	2	0	2	2	2	0	2	2
AM1165	514716924	514750822	33898	2	0	2	0	2	2	2	2	0	0	2	2	2	2	2	0	2	2	0	0	-1	2	0	0	2	0	-1	2	0	0	2	2	2	0	0	0	2	0	2	0	2	2	2	0	2	2
AM1167	514750823	514762732	11909	2	0	2	0	2	2	2	2	0	0	2	2	2	2	2	0	2	2	0	0	-1	2	0	0	2	0	-1	2	0	0	2	2	2	0	0	0	2	0	2	0	2	2	2	0	2	2
AM1168	514762733	514804229	41496	2	0	2	0	2	2	2	2	0	0	2	2	2	2	2	0	2	2	0	0	-1	2	0	0	2	0	-1	2	0	0	2	2	2	0	0	0	2	0	2	0	2	2	2	0	2	2
AM1169	514804230	514830965	26735	2	0	2	0	2	2	2	2	0	0	2	2	2	2	2	0	2	2	0	0	-1	2	0	0	2	0	-1	2	0	0	2	2	2	0	0	0	2	0	2	0	2	2	2	0	-1	2
AM1170	514830966	515624425	793459	2	0	2	0	2	2	2	2	0	0	2	2	2	2	2	0	2	2	0	0	-1	2	0	0	2	0	-1	2	0	0	2	2	2	0	0	0	2	-1	2	0	2	2	2	0	-1	2
AM1171	515624426	515717229	92803	2	0	2	0	2	2	2	2	0	0	2	2	2	2	2	0	2	2	0	0	-1	2	0	0	2	0	0	2	0	0	2	2	2	0	0	0	2	-1	2	0	2	2	2	0	-1	2
AM1172	515717230	515788924	71694	2	0	2	0	2	2	2	2	0	0	2	2	2	2	2	0	2	2	0	0	-1	2	0	0	2	0	0	2	0	0	2	2	2	0	0	0	2	-1	2	0	2	2	2	0	-1	2
AM1173	515788925	515852405	63480	2	0	2	0	2	2	2	2	0	0	2	2	2	2	2	0	-1	2	0	0	-1	2	0	0	2	0	0	2	0	0	2	2	2	0	0	0	2	-1	2	0	2	2	2	0	-1	2
AM1174	515852406	516252315	399909	2	0	2	0	2	2	2	2	0	0	2	2	2	2	2	0	-1	2	0	0	-1	2	0	0	2	0	0	2	0	0	2	2	2	0	0	0	2	-1	2	0	2	2	2	0	-1	2
AM1175	516252316	516436723	184407	2	0	2	0	2	2	2	2	0	0	2	2	2	2	2	0	-1	2	0	0	-1	2	0	0	2	0	0	2	0	0	2	2	2	0	0	0	2	-1	2	0	2	2	2	0	-1	2
BM3	1	232051	232050	0	0	2	2	0	2	2	2	2	2	0	0	2	0	2	-1	2	2	2	2	0	2	2	2	-1	2	-1	2	0	2	2	2	0	0	2	2	2	2	2	0	2	2	2	0	0	2
BM1	232052	305978	73926	0	0	2	2	0	2	2	2	2	2	0	0	2	0	2	-1	2	2	2	2	0	2	2	2	-1	2	-1	2	0	2	2	2	0	0	2	2	2	2	2	0	2	2	2	0	0	2
BM2	305979	474888	168909	0	0	2	2	0	2	2	2	2	2	0	0	2	0	2	-1	2	2	2	2	0	2	2	2	-1	2	-1	2	0	2	2	2	0	0	2	2	2	2	2	0	2	2	2	0	0	2
BM4	474889	600463	125574	0	0	2	2	0	2	2	2	2	2	0	0	2	0	2	-1	2	2	2	2	0	2	2	2	-1	2	-1	2	0	2	2	2	0	0	2	2	2	2	2	0	2	2	2	0	0	2
BM5	600464	609861	9397	0	0	2	2	0	2	2	2	2	2	0	0	2	0	2	-1	2	2	2	2	0	2	2	2	-1	2	-1	2	0	2	2	2	0	0	2	2	2	2	2	0	2	2	2	0	0	2
BM6	609862	1363827	753965	0	0	2	2	0	2	2	2	2	2	0	0	2	0	2	-1	2	2	2	2	0	2	2	2	-1	2	-1	2	0	2	2	2	0	0	2	2	2	2	2	0	2	2	2	0	0	2
BM7	1363828	1535501	171673	0	0	2	2	0	2	2	2	2	2	0	0	2	0	2	-1	2	2	2	2	0	2	2	2	-1	2	-1	2	0	2	2	2	0	0	2	2	2	2	2	0	2	2	2	0	0	2
BM8	1535502	1543832	8330	0	0	2	2	0	2	2	2	2	2	0	0	2	0	2	-1	2	2	2	2	0	2	2	2	-1	2	-1	2	0	2	2	2	0	0	2	2	2	2	2	0	2	2	2	0	0	2
BM9	1543833	1552913	9080	0	0	2	2	0	2	2	2	2	2	0	0	2	0	2	-1	2	2	2	2	0	2	2	2	-1	2	-1	2	0	2	2	2	0	0	2	2	2	2	2	0	2	2	2	0	0	2
BM10	1552914	1646844	93930	0	0	2	2	0	2	2	2	2	2	0	0	2	0	2	-1	2	2	2	2	0	2	2	2	-1	2	-1	2	0	2	2	2	0	0	2	2	2	2	2	0	2	2	2	0	0	2
BM11	1646845	1670123	23278	0	0	2	2	0	2	2	2	2	2	0	0	2	0	2	-1	2	2	2	2	0	2	2	2	-1	2	-1	2	0	2	2	2	0	0	2	2	2	2	2	0	2	2	2	0	0	2
BM12	1670124	1704448	34324	0	0	2	2	0	2	2	2	2	2	0	0	2	0	2	-1	2	2	2	2	0	2	2	2	-1	2	-1	2	0	2	2	2	0	0	2	2	2	2	2	0	2	2	2	0	0	2
BM13	1704449	1766983	62534	0	0	2	2	0	2	2	2	2	2	0	0	2	0	2	-1	2	2	2	2	0	2	2	2	-1	2	-1	2	0	2	2	2	0	0	2	2	2	2	2	0	2	2	2	0	0	2
BM14	1766984	1846559	79575	0	0	2	2	0	2	2	2	2	2	0	0	2	0	2	-1	2	2	2	2	0	2	2	2	-1	2	-1	2	0	2	2	2	0	0	2	2	2	2	2	0	2	2	2	0	0	2
BM15	1846560	1862028	15468	0	0	2	2	0	2	2	2	2	2	0	0	2	0	2	-1	2	2	2	2	0	2	2	2	-1	2	2	2	0	2	2	2	0	0	2	2	2	2	2	0	2	2	2	0	0	2
BM16	1862029	1958233	96204	0	0	2	2	0	2	2	2	2	2	0	0	2	0	2	-1	2	2	2	2	0	2	2	2	-1	2	2	2	0	2	2	2	0	0	2	2	2	2	2	0	2	2	2	0	0	2
BM17	1958234	2250093	291859	0	0	2	2	0	2	2	2	2	2	0	0	2	0	2	2	2	2	2	2	0	2	2	2	-1	2	2	2	0	2	2	2	0	0	2	2	2	2	2	0	2	2	2	0	0	2
BM18	2250094	2290231	40137	0	0	2	2	0	2	2	2	2	2	0	0	2	0	2	2	2	2	2	2	0	2	2	2	-1	2	2	2	0	2	2	2	0	0	2	2	2	2	2	0	2	2	2	0	0	2
BM19	2290232	2512027	221795	0	0	2	2	0	2	2	2	2	2	0	0	2	0	2	2	2	2	2	2	0	2	2	2	-1	2	2	2	0	2	2	2	0	0	2	2	2	2	2	0	2	2	2	0	0	2
BM20	2512028	2556489	44461	0	0	2	2	0	2	2	2	2	2	0	0	2	0	2	2	2	2	2	2	0	2	2	2	-1	2	2	2	0	2	2	2	0	0	2	2	2	2	2	0	2	2	2	0	0	2
BM21	2556490	2848534	292044	0	0	2	2	0	2	2	2	2	2	0	0	2	0	2	2	2	2	2	2	0	2	2	2	-1	2	2	2	0	2	2	2	0	0	2	2	2	2	2	0	2	2	2	0	0	2
BM22	2848535	2871623	23088	0	0	2	2	0	2	2	2	2	2	0	0	2	0	2	2	2	2	2	2	0	2	2	2	-1	2	-1	2	0	2	2	2	0	0	2	2	2	2	2	0	2	2	2	0	0	2
BM23	2871624	2884829	13205	0	0	2	2	0	2	2	2	2	2	0	0	2	0	2	2	2	2	2	2	0	2	2	2	-1	2	-1	2	0	2	2	2	0	0	2	2	2	2	2	0	2	2	2	0	0	2
BM24	2884830	3194922	310092	0	0	2	2	0	2	2	2	2	2	0	0	2	0	2	2	2	2	2	2	0	2	2	2	-1	2	-1	2	0	2	2	2	0	0	2	2	2	2	2	2	2	2	2	0	0	2
BM25	3194923	3205727	10804	0	0	2	2	0	2	2	2	2	2	0	0	2	0	2	2	2	2	2	2	0	2	2	2	-1	2	-1	2	0	2	2	2	0	0	2	2	2	2	2	2	2	2	2	0	0	2
BM26	3205728	3373082	167354	0	0	2	2	0	2	2	2	2	2	0	0	2	0	2	2	2	2	2	2	0	2	2	2	-1	2	-1	2	0	2	2	2	0	0	2	2	2	2	2	2	2	2	2	0	0	2
BM27	3373083	3580635	207552	0	0	2	2	0	2	2	2	2	2	0	0	2	0	2	2	2	2	2	2	0	2	2	2	-1	2	0	2	0	2	2	2	0	0	2	2	2	2	2	2	2	2	2	0	0	2
BM28	3580636	3674785	94149	0	0	2	2	0	2	2	2	2	2	0	0	2	0	2	2	2	2	2	2	0	2	2	2	-1	2	0	2	0	2	2	2	0	0	2	2	2	2	2	2	2	2	2	0	0	2
BM29	3674786	3689380	14594	0	0	2	2	0	2	2	2	2	2	0	0	2	0	2	2	2	2	2	2	0	2	2	2	-1	2	0	2	0	2	2	2	0	0	2	2	2	2	2	2	2	2	2	0	0	2
BM30	3689381	3755050	65669	0	0	2	2	0	2	2	2	2	2	0	0	2	0	2	2	2	2	2	2	0	2	2	2	-1	2	-1	2	0	2	2	2	0	0	2	2	2	2	2	2	2	2	2	0	0	2
BM31	3755051	3829509	74458	0	0	2	2	0	2	2	2	2	2	0	0	2	0	2	2	2	2	2	2	0	2	2	2	-1	2	-1	2	0	2	2	2	0	0	2	2	2	2	2	2	2	2	2	0	0	2
BM32	3829510	3867434	37924	0	0	2	2	0	2	2	2	2	2	0	0	2	0	2	2	2	2	2	2	0	2	2	2	-1	2	-1	2	0	2	2	2	0	0	2	2	2	2	2	2	2	2	2	0	0	2
BM33	3867435	3900496	33061	0	0	2	2	0	2	2	2	2	2	0	0	2	0	2	2	2	2	2	2	0	2	2	2	-1	2	2	2	0	2	2	2	0	0	2	2	2	2	2	2	2	2	2	0	0	2
BM34	3900497	3927395	26898	0	0	2	2	0	2	2	2	2	2	0	0	2	0	2	2	2	2	2	2	0	2	2	2	-1	2	2	2	0	2	2	2	0	0	2	2	2	2	2	2	2	2	2	0	0	2
BM35	3927396	3939776	12380	0	0	2	2	0	2	2	2	2	2	0	0	2	0	2	2	2	2	2	2	0	2	2	2	-1	2	2	2	0	2	2	2	0	0	2	2	2	2	2	2	2	2	2	0	0	2
BM37	3939777	4013086	73309	0	0	2	2	0	2	2	2	2	2	0	0	2	0	2	2	2	2	2	2	0	2	2	2	-1	2	2	2	0	2	2	2	0	0	2	2	2	2	2	2	2	2	2	0	0	2
BM36	4013087	4212449	199362	0	0	2	2	0	2	2	2	2	2	0	0	2	0	2	2	2	2	2	2	0	2	2	2	-1	2	2	2	0	2	2	2	0	0	2	2	2	2	2	2	2	2	2	0	0	2
BM38	4212450	4794149	581699	0	0	2	2	0	2	2	2	2	2	0	0	2	0	2	2	2	2	2	2	0	2	2	2	-1	2	-1	2	0	2	2	2	0	0	2	2	2	2	2	2	2	2	2	0	0	2
BM39	4794150	4834537	40387	0	0	2	2	0	2	2	2	2	2	0	0	2	0	2	2	2	2	2	2	0	2	2	2	-1	2	-1	2	0	2	2	2	0	0	2	2	2	2	2	2	2	2	2	0	0	2
BM40	4834538	5155945	321407	0	0	2	2	0	2	2	2	2	2	0	0	2	0	2	2	2	2	2	2	0	2	2	2	-1	2	-1	2	0	2	2	2	0	0	2	2	2	2	2	2	2	2	2	0	0	2
BM41	5155946	5296432	140486	0	0	2	2	0	2	2	2	2	2	0	0	2	0	2	2	2	2	2	2	0	2	2	2	-1	2	-1	2	0	2	2	2	0	0	2	2	2	2	2	2	2	2	2	0	0	2
BM42	5296433	5362840	66407	0	0	2	2	0	0	2	2	2	2	0	0	2	0	2	2	2	2	2	2	2	2	2	2	-1	2	-1	2	0	2	2	2	0	0	2	2	2	2	2	2	2	2	2	0	0	2
BM43	5362841	5379879	17038	0	0	2	2	0	0	2	2	2	2	0	0	2	0	2	2	2	2	2	2	2	2	2	2	-1	2	-1	2	0	2	2	2	0	0	2	2	2	2	2	2	2	2	2	0	0	2
BM44	5379880	5490890	111010	0	0	2	2	0	0	2	2	2	2	0	0	2	0	2	2	2	2	2	2	2	2	2	2	-1	2	-1	2	0	2	2	2	0	0	2	2	2	2	2	2	2	2	2	0	0	2
BM45	5490891	6193055	702164	0	0	2	2	0	0	2	2	2	2	0	0	2	0	2	2	2	2	2	2	2	2	2	2	-1	2	2	2	0	2	2	2	0	0	2	2	2	2	2	2	2	2	2	0	0	2
BM46	6193056	8890471	2697415	0	0	2	2	0	0	2	2	2	2	0	0	2	0	2	2	2	2	2	2	2	2	2	2	-1	2	-1	2	0	2	2	2	0	0	2	2	2	2	2	2	2	2	2	0	0	2
BM47	8890472	8995910	105438	0	0	2	2	0	0	2	2	2	2	0	-1	2	0	2	2	2	2	2	2	2	2	2	2	-1	2	-1	2	0	2	2	2	0	0	2	2	2	2	2	2	2	2	2	0	0	2
BM48	8995911	9168412	172501	0	0	2	2	0	0	2	2	2	2	0	-1	2	0	2	2	2	2	2	2	2	2	2	2	-1	2	-1	2	0	2	2	2	0	0	2	2	2	2	2	2	2	2	2	0	0	2
BM49	9168413	9551949	383536	0	0	2	2	0	0	2	2	2	2	0	-1	2	0	2	2	2	2	2	2	2	2	2	2	-1	2	-1	2	0	2	2	2	0	0	2	2	2	2	2	2	2	2	2	0	0	2
BM50	9551950	9646002	94052	0	0	2	2	0	0	2	2	2	2	0	-1	2	0	2	2	2	2	2	2	2	2	2	2	-1	2	-1	2	0	2	2	2	0	0	2	2	2	2	2	2	2	2	2	0	0	2
BM51	9646003	9706095	60092	0	0	2	2	0	0	2	2	2	2	0	-1	2	0	2	2	2	2	2	2	2	2	2	2	-1	2	0	2	0	2	2	2	0	0	2	2	2	2	2	2	2	2	2	0	0	2
BM52	9706096	10221331	515235	0	0	2	2	0	0	2	2	2	2	0	-1	2	0	2	2	2	2	2	2	2	2	2	2	-1	2	0	2	0	2	2	2	0	0	2	2	2	2	2	2	2	2	2	0	0	2
BM53	10221332	10354212	132880	0	0	2	2	0	0	2	2	2	2	0	-1	2	0	2	2	2	2	2	2	2	2	2	2	-1	2	-1	2	0	2	2	2	0	0	2	2	2	2	2	2	2	2	2	0	0	2
BM54	10354213	10532632	178419	0	0	2	2	0	0	2	2	2	2	0	0	2	0	2	2	2	2	2	2	2	2	2	2	-1	2	-1	2	0	2	2	2	0	0	2	2	2	2	2	2	2	2	2	0	0	2
BM55	10532633	10643653	111020	0	0	2	2	0	0	2	2	2	2	0	0	2	0	2	2	2	2	2	2	2	2	2	2	-1	2	-1	2	0	2	2	2	0	0	2	2	2	2	2	2	2	2	2	0	0	2
BM56	10643654	10729236	85582	0	0	2	2	0	0	2	2	2	2	0	0	2	0	2	2	2	2	2	2	2	2	2	2	-1	2	-1	2	0	2	2	2	0	0	2	2	2	2	2	2	2	2	2	0	0	2
BM57	10729237	10794073	64836	0	0	2	2	0	0	2	2	2	2	0	0	2	0	2	2	2	2	0	0	2	2	2	2	-1	2	-1	2	0	2	2	2	0	0	2	2	2	2	2	2	2	2	2	0	0	2
BM58	10794074	10818112	24038	0	0	2	2	0	0	2	2	2	2	0	0	2	0	2	2	2	2	0	0	2	2	2	2	-1	2	-1	2	0	2	2	2	0	0	2	2	2	2	2	2	2	2	2	0	0	2
BM59	10818113	11019966	201853	0	0	2	2	0	0	2	2	2	2	0	0	2	0	2	2	2	2	0	0	2	2	2	2	-1	2	-1	2	0	2	2	2	0	0	2	2	2	2	2	2	2	2	2	0	0	2
BM60	11019967	11132137	112170	0	0	2	2	0	0	2	2	2	2	0	0	2	0	2	2	2	2	0	0	2	2	2	2	-1	2	-1	2	0	2	2	2	0	0	2	2	2	2	2	2	2	2	2	0	0	2
BM61	11132138	11569231	437093	0	0	2	2	0	0	2	2	2	2	0	0	2	0	2	-1	2	2	0	0	2	2	2	2	-1	2	-1	2	0	2	2	2	0	0	2	2	2	2	2	2	2	2	2	0	0	2
BM62	11569232	11795772	226540	0	0	2	2	0	0	2	2	2	2	0	0	2	0	2	-1	2	2	0	0	2	2	2	2	-1	2	-1	2	0	2	2	2	0	0	2	2	2	2	2	2	2	2	2	0	0	2
BM63	11795773	12045261	249488	0	0	2	2	0	0	2	2	2	2	0	0	2	0	2	2	2	2	0	0	2	2	2	2	-1	2	-1	2	0	2	2	2	0	0	2	2	2	2	2	2	2	2	2	0	0	2
BM64	12045262	12142416	97154	0	0	2	2	0	0	2	2	2	2	0	0	2	0	2	2	2	2	0	0	2	2	2	2	-1	2	-1	2	0	2	2	2	0	0	2	2	2	2	2	2	2	2	2	0	0	2
BM65	12142417	12164783	22366	0	0	2	2	0	0	2	2	2	2	0	0	2	0	2	2	2	2	0	0	2	2	2	2	-1	2	-1	2	0	2	2	2	0	0	2	2	2	2	2	2	2	2	2	0	0	2
BM66	12164784	12228838	64054	0	0	2	2	0	0	2	2	2	2	0	0	2	0	2	2	2	2	0	0	2	2	2	2	-1	2	-1	2	0	2	2	2	0	0	2	2	2	2	2	2	2	2	2	0	0	2
BM67	12228839	12241086	12247	0	0	2	2	0	0	2	2	2	2	0	0	2	0	2	2	2	2	0	0	2	2	2	2	-1	2	-1	2	0	2	2	2	0	0	2	2	2	2	2	2	2	2	2	0	0	2
BM68	12241087	12637994	396907	0	0	2	2	0	0	2	2	2	2	0	0	2	0	2	2	2	2	0	0	2	2	2	2	-1	2	-1	2	0	2	2	2	0	0	2	2	2	2	2	2	2	2	2	0	0	2
BM69	12637995	12650223	12228	0	0	2	2	0	0	2	2	2	2	0	0	2	0	2	2	2	2	0	0	2	2	2	2	-1	2	-1	2	0	2	2	2	0	0	2	2	2	2	2	2	2	2	2	0	0	2
BM70	12650224	12791708	141484	0	0	2	2	0	0	2	2	2	2	0	0	2	0	2	2	2	2	0	0	2	2	2	2	-1	2	-1	2	0	2	2	2	0	0	2	2	2	2	2	2	2	2	2	0	0	2
BM71	12791709	12868653	76944	0	0	2	2	0	0	2	2	2	2	0	0	2	0	2	2	2	2	0	0	2	2	2	2	-1	2	-1	2	0	2	2	2	0	0	2	2	2	2	2	2	2	2	2	0	0	2
BM72	12868654	12886448	17794	0	0	2	2	0	0	2	2	2	2	0	0	2	0	2	2	2	2	0	0	2	2	2	2	-1	2	-1	2	0	2	2	2	0	0	2	2	2	2	2	2	2	2	2	0	0	2
BM73	12886449	13026402	139953	0	0	2	2	0	0	2	2	2	2	0	0	2	0	2	2	2	2	0	0	2	2	2	2	-1	2	-1	2	0	2	2	2	0	0	2	2	2	2	2	2	2	2	2	0	0	2
BM74	13026403	13340923	314520	0	0	2	2	0	0	2	2	2	2	0	0	2	0	2	2	2	2	0	0	2	2	2	2	-1	2	-1	2	0	2	2	2	0	0	2	2	2	2	2	2	2	2	2	0	0	2
BM75	13340924	13814287	473363	0	0	2	2	0	0	2	2	2	2	0	0	2	0	2	2	2	2	0	0	2	2	2	2	-1	2	0	2	0	2	2	2	0	0	2	2	2	2	2	2	2	2	2	0	0	2
BM76	13814288	13939524	125236	0	0	2	2	0	0	2	2	2	2	0	0	2	0	2	2	2	2	0	0	2	2	2	2	-1	2	0	2	0	2	2	2	0	0	2	2	2	2	2	2	2	2	2	0	0	2
BM77	13939525	13950678	11153	0	0	2	2	0	0	2	2	2	2	0	0	2	0	2	2	2	2	0	0	2	2	2	2	-1	2	0	2	0	2	2	2	0	0	2	2	2	2	2	2	2	2	2	0	0	2
BM78	13950679	14687664	736985	0	0	2	2	0	0	2	2	2	2	0	0	2	0	2	2	2	2	0	0	2	2	2	2	-1	2	0	2	0	2	2	2	0	0	2	2	2	2	2	2	2	2	2	0	0	2
BM79	14687665	14736136	48471	0	0	2	2	0	0	2	2	2	2	0	0	2	0	2	2	2	2	0	0	2	2	2	2	-1	2	0	2	0	2	2	2	0	0	2	2	2	2	2	2	2	2	2	0	0	2
BM80	14736137	14992780	256643	0	0	2	2	0	0	2	2	2	2	0	0	2	0	2	2	2	2	0	0	2	2	2	2	-1	2	0	2	0	2	2	2	0	0	2	2	2	2	2	2	2	2	2	0	0	2
BM81	14992781	15361894	369113	0	0	2	2	0	0	2	2	2	2	0	0	2	0	2	2	2	2	0	0	2	2	2	2	-1	2	0	2	0	2	2	2	0	0	2	2	2	2	2	2	2	2	2	0	0	2
BM82	15361895	15400487	38592	0	0	2	2	0	0	2	2	2	2	0	0	2	0	2	2	2	2	0	0	2	2	2	2	-1	2	0	2	0	2	2	2	0	0	2	2	2	2	2	2	2	2	2	0	0	2
BM83	15400488	17437414	2036926	0	0	2	2	0	0	2	2	2	2	0	0	2	0	2	2	2	2	0	0	2	2	2	2	-1	2	0	2	0	2	2	2	0	0	2	2	2	2	2	2	2	2	2	0	0	2
BM84	17437415	17794963	357548	0	0	2	2	0	0	2	2	2	2	0	0	2	0	2	2	2	2	0	0	2	2	2	2	0	2	0	2	0	2	2	2	0	0	2	2	2	2	2	2	2	2	2	0	0	2
BM85	17794964	17983222	188258	0	0	2	2	0	0	2	2	2	2	0	0	2	0	2	2	2	2	0	0	2	2	2	2	0	2	0	2	0	2	2	2	0	0	2	2	2	2	2	2	2	2	2	0	0	2
BM86	17983223	18143593	160370	2	0	2	2	0	0	2	2	2	2	0	0	2	2	2	2	2	2	2	2	2	2	2	2	0	2	0	2	0	2	2	2	0	0	2	2	2	2	2	2	2	2	2	0	0	2
BM87	18143594	18151511	7917	2	0	2	2	0	0	2	2	2	2	0	0	2	2	2	2	2	2	2	2	2	2	2	2	0	2	0	2	0	2	2	2	0	0	2	2	2	2	2	2	2	2	2	0	0	2
BM88	18151512	18157065	5553	2	0	2	2	0	0	2	2	2	2	0	0	2	2	2	2	2	2	2	2	2	2	2	2	0	2	0	2	0	2	2	2	0	0	2	2	2	2	2	2	2	2	2	0	0	2
BM89	18157066	18246888	89822	2	0	2	2	0	0	2	2	2	2	0	0	2	2	2	2	2	2	2	2	2	2	2	2	0	2	0	2	0	2	2	2	0	0	2	0	2	2	2	2	2	2	2	0	0	2
BM90	18246889	18260267	13378	2	0	2	2	0	0	2	2	2	2	0	0	2	2	2	2	2	2	2	2	2	2	2	2	0	2	0	2	0	2	2	2	0	0	2	0	2	2	2	2	2	2	2	0	0	2
BM91	18260268	18428096	167828	2	0	2	2	0	0	2	2	2	2	0	0	2	2	2	2	2	2	2	2	2	2	2	2	0	2	0	2	0	2	2	2	0	0	2	0	2	2	2	2	2	2	2	0	0	2
BM92	18428097	18845701	417604	2	0	2	2	0	0	2	2	2	2	0	0	2	2	2	2	2	2	2	2	2	2	2	2	0	2	-1	2	0	2	2	2	0	0	2	0	2	2	2	2	2	2	2	0	0	2
BM93	18845702	19006904	161202	2	0	2	2	0	0	2	2	2	2	0	0	2	2	2	2	2	2	2	2	2	2	2	2	0	2	-1	2	0	2	2	2	0	0	2	0	2	2	2	2	2	2	2	0	0	2
BM94	19006905	19020455	13550	2	0	2	2	0	0	2	2	2	2	0	0	2	2	2	2	2	2	2	2	2	2	2	2	0	2	-1	2	0	2	2	2	0	0	2	0	2	2	2	2	2	2	2	0	0	2
BM95	19020456	19164027	143571	2	0	2	2	0	0	2	2	2	2	0	0	2	2	2	2	2	2	2	2	2	2	2	2	0	2	-1	2	0	2	2	2	0	0	2	0	2	2	2	2	2	2	2	0	0	2
BM96	19164028	19193071	29043	2	0	2	2	0	0	2	2	2	2	0	0	2	2	2	2	2	2	2	2	2	2	2	2	0	2	-1	2	0	2	2	2	0	0	2	0	2	2	2	2	2	2	2	0	0	2
BM97	19193072	19226689	33617	2	0	2	2	0	0	2	2	2	2	0	-1	2	2	2	2	2	2	2	2	2	2	2	2	0	2	-1	2	0	2	2	2	0	0	2	0	2	2	2	2	2	2	2	0	0	2
BM98	19226690	19260085	33395	2	0	2	2	0	0	2	2	2	2	0	-1	2	2	2	2	2	2	2	2	2	2	2	2	0	2	-1	2	0	2	2	2	0	0	2	0	2	2	2	2	2	2	2	0	0	2
BM99	19260086	19265955	5869	2	0	2	2	0	0	2	2	2	2	0	-1	2	2	2	2	2	2	2	2	2	2	2	2	0	2	-1	2	0	2	2	2	0	0	2	0	2	2	2	2	2	2	2	0	0	2
BM100	19265956	19274516	8560	0	0	2	2	0	0	2	2	2	2	0	-1	2	2	2	2	2	2	2	2	2	2	2	2	0	2	-1	2	0	2	2	2	0	0	2	0	2	2	2	2	2	2	2	0	0	2
BM101	19274517	19300284	25767	0	0	2	2	0	0	2	2	2	2	0	-1	2	2	2	2	2	2	2	2	2	2	2	2	0	2	-1	2	0	2	2	2	0	0	2	0	2	2	2	2	2	2	2	0	0	2
BM102	19300285	19376104	75819	0	0	2	2	0	0	2	2	2	2	0	0	2	2	2	2	2	2	2	2	2	2	2	2	0	2	-1	2	0	2	2	2	0	0	2	0	2	2	2	2	2	2	2	0	0	2
BM103	19376105	19410902	34797	0	0	2	2	0	0	2	2	2	2	0	0	2	2	2	2	2	2	2	2	2	2	2	2	0	2	-1	2	0	2	2	2	0	0	0	0	2	2	2	2	2	2	2	0	0	2
BM104	19410903	19577824	166921	0	0	2	2	0	0	2	2	2	2	0	0	2	2	2	2	2	2	2	2	2	2	2	2	0	2	2	2	0	2	2	2	0	0	0	0	2	2	2	2	2	2	2	0	0	2
BM105	19577825	19608967	31142	0	0	2	2	0	0	2	2	2	2	0	0	2	2	2	2	2	2	2	2	2	2	2	2	0	2	2	2	2	2	2	2	0	0	0	0	2	2	2	2	2	2	2	0	0	2
BM106	19608968	19836049	227081	0	0	2	2	0	0	2	2	2	2	0	0	2	2	2	2	2	2	2	2	2	2	2	2	0	2	2	2	2	2	2	2	0	0	0	0	2	2	2	2	2	2	2	0	0	2
BM107	19836050	19877756	41706	0	0	2	2	0	0	2	2	2	2	0	0	2	2	2	2	2	2	2	2	2	2	2	2	0	2	-1	2	2	2	2	2	0	0	0	0	2	2	2	2	2	2	2	0	0	2
BM108	19877757	19954818	77061	0	0	2	2	0	0	2	2	2	2	0	0	2	2	2	2	2	2	2	2	2	2	2	2	0	2	-1	2	2	2	2	2	0	0	0	0	2	2	2	2	2	2	2	0	0	2
BM109	19954819	20026867	72048	0	0	2	2	0	0	2	2	2	2	0	0	2	2	2	2	2	2	2	2	2	2	2	2	0	2	-1	2	2	2	2	2	0	0	0	0	2	2	2	2	2	2	2	0	0	2
BM110	20026868	21034010	1007142	0	0	2	2	0	0	2	2	2	2	0	0	2	2	2	2	2	2	2	2	2	2	2	2	0	2	-1	2	2	2	2	2	0	0	0	0	2	2	2	2	2	2	2	0	0	2
BM111	21034011	21146500	112489	0	0	2	2	0	0	2	2	2	2	0	0	2	2	2	2	2	2	2	2	2	2	2	2	0	2	-1	2	2	2	2	2	0	0	0	0	2	2	2	2	2	2	2	0	0	2
BM112	21146501	21275419	128918	0	0	2	2	0	0	2	2	2	2	0	0	2	2	2	2	2	2	2	2	2	2	2	2	0	2	-1	2	2	2	2	2	0	0	0	0	2	2	2	2	2	2	2	0	0	2
BM113	21275420	21285590	10170	0	0	2	2	0	0	2	2	2	2	0	0	2	2	2	2	2	2	2	2	2	2	2	2	0	2	-1	2	2	2	2	2	0	0	0	0	2	2	2	2	2	2	2	0	0	2
BM114	21285591	21441247	155656	0	0	2	2	0	0	2	2	2	2	0	0	2	2	2	2	2	2	2	2	2	2	2	2	0	2	-1	2	2	2	2	2	0	0	0	0	2	2	2	2	2	2	2	0	0	2
BM115	21441248	21632897	191649	0	0	2	2	0	0	2	2	2	2	0	0	2	2	2	2	2	2	2	2	2	2	2	2	0	2	-1	2	2	2	2	2	0	0	0	0	2	2	2	2	2	2	2	0	0	2
BM116	21632898	21984826	351928	0	0	2	2	0	0	2	2	2	2	0	0	2	2	2	2	2	2	2	2	2	2	2	2	0	2	-1	2	2	2	2	2	0	0	0	0	2	2	2	2	2	2	2	0	0	2
BM117	21984827	22011582	26755	0	0	2	2	0	0	2	2	2	2	0	0	2	2	2	2	2	2	2	2	2	2	2	2	0	2	-1	2	2	2	2	2	0	0	0	0	2	2	2	2	2	2	2	0	0	2
BM118	22011583	22017318	5735	0	0	2	2	0	0	2	2	2	2	0	0	2	2	2	2	2	2	2	2	2	2	2	2	0	2	-1	2	2	2	2	2	0	0	0	0	2	2	2	2	2	2	2	0	0	2
BM119	22017319	22225376	208057	0	0	2	2	0	0	2	2	2	2	0	0	2	2	2	2	2	2	2	2	2	2	2	2	0	2	0	2	2	2	2	2	0	0	0	0	2	2	2	2	2	0	0	0	0	2
BM120	22225377	22237094	11717	0	0	2	2	0	0	2	2	2	2	0	0	2	2	2	2	2	2	2	2	2	2	2	2	0	2	-1	2	2	2	2	2	0	0	0	0	2	2	2	2	2	0	0	0	0	2
BM121	22237095	22280908	43813	0	0	2	2	0	0	2	2	2	2	0	0	2	2	2	2	2	2	2	2	2	2	2	2	0	2	-1	2	2	2	2	2	0	0	0	0	2	2	2	2	2	0	0	0	0	2
BM122	22280909	22287793	6884	0	0	2	2	0	0	2	2	2	2	0	0	2	2	2	2	2	2	2	2	2	2	2	2	0	2	-1	2	2	2	2	2	0	0	0	0	2	2	2	2	2	0	0	0	0	2
BM123	22287794	22686766	398972	0	0	2	2	0	0	2	2	2	2	0	-1	2	2	2	2	2	2	2	2	2	2	2	2	0	2	-1	2	2	2	2	2	0	0	0	0	2	2	2	2	2	0	0	0	0	2
BM124	22686767	22744206	57439	0	0	2	2	0	0	2	2	2	2	0	-1	2	2	2	2	2	2	2	2	2	2	2	2	0	2	-1	2	2	2	2	2	0	0	0	0	2	2	2	2	2	0	0	0	0	2
BM125	22744207	23320568	576361	0	0	2	2	0	0	2	2	2	2	0	-1	2	2	2	2	2	2	2	2	2	2	2	2	0	2	-1	2	2	2	2	2	0	0	0	0	2	2	2	2	2	0	0	0	0	2
BM126	23320569	23339658	19089	0	0	2	2	0	0	2	2	2	2	0	-1	2	2	2	2	2	2	2	2	2	2	2	2	0	2	-1	2	2	-1	2	2	0	0	0	0	2	2	2	2	2	0	0	0	0	2
BM127	23339659	23377237	37578	0	0	2	2	0	0	2	2	2	2	0	-1	2	2	2	2	2	2	2	2	2	2	2	2	0	2	-1	2	2	-1	2	2	0	0	0	0	2	2	2	2	2	0	0	0	0	2
BM128	23377238	23388232	10994	0	0	2	2	0	0	2	2	2	2	0	-1	2	2	2	2	2	2	2	2	2	2	2	2	0	2	-1	2	2	-1	2	2	0	0	0	0	2	2	2	2	2	0	0	0	0	2
BM129	23388233	23443581	55348	0	0	2	2	0	0	2	2	2	2	0	-1	2	2	2	2	2	2	2	2	2	2	2	2	0	2	-1	2	2	-1	2	2	0	0	0	0	2	2	2	2	2	0	0	0	0	2
BM130	23443582	23583718	140136	0	0	2	2	0	0	2	2	2	2	0	-1	2	2	2	2	2	2	2	2	2	2	2	2	0	2	-1	2	2	-1	2	2	0	0	0	0	2	2	2	2	2	0	0	0	0	2
BM131	23583719	23610117	26398	0	0	2	2	0	0	2	2	2	2	0	-1	2	2	2	2	2	2	2	2	2	2	2	2	0	2	-1	2	2	-1	2	2	0	0	0	0	2	2	2	2	2	0	0	0	0	2
BM132	23610118	24278264	668146	0	0	2	2	0	0	2	2	2	2	0	0	2	2	2	2	2	2	2	2	2	2	2	2	0	2	-1	2	2	-1	2	2	0	0	0	0	2	2	2	2	2	0	0	0	0	2
BM133	24278265	24612050	333785	0	0	2	2	0	0	2	2	2	2	0	0	2	2	2	2	2	2	2	2	2	2	2	2	0	2	0	2	2	-1	2	2	0	0	0	0	2	2	2	2	2	0	0	0	0	2
BM134	24612051	24729474	117423	0	0	2	2	0	0	2	2	2	2	0	-1	2	2	2	2	2	2	2	2	2	2	2	2	0	2	0	2	2	-1	2	2	0	0	0	0	2	2	2	2	2	0	0	0	0	2
BM135	24729475	25031978	302503	0	0	2	2	0	0	2	2	2	2	0	-1	2	2	2	2	2	2	2	2	2	2	2	2	0	2	0	2	2	-1	2	2	0	0	0	0	2	2	2	2	2	0	0	0	0	2
BM136	25031979	25081658	49679	0	0	2	2	0	0	2	2	2	2	0	-1	2	2	2	2	2	2	2	2	2	2	2	2	0	2	0	2	2	-1	2	2	0	0	0	0	2	2	2	2	2	0	0	0	0	2
BM137	25081659	25167519	85860	0	0	2	2	0	0	2	2	2	2	0	-1	2	2	2	2	2	2	2	2	2	2	2	2	2	2	0	2	2	-1	2	2	0	0	0	0	2	2	2	2	2	0	0	0	0	2
BM138	25167520	25225513	57993	0	0	2	2	0	0	2	2	2	2	0	-1	2	2	2	2	2	2	2	2	2	2	2	2	2	2	2	2	2	-1	2	2	0	0	0	0	2	2	2	2	2	0	0	0	0	2
BM139	25225514	25268522	43008	0	0	2	2	0	0	2	2	2	2	0	-1	2	2	2	2	2	2	2	2	2	2	2	2	2	2	2	2	2	-1	2	2	0	0	0	0	2	2	2	2	2	0	0	0	0	2
BM140	25268523	25465408	196885	0	0	2	2	0	0	2	2	2	2	0	-1	2	2	2	2	2	2	2	2	2	2	2	2	2	2	2	2	2	-1	2	2	0	0	0	0	0	2	2	2	2	0	0	0	0	2
BM141	25465409	25620075	154666	0	0	2	2	0	0	2	2	2	2	0	-1	2	2	2	2	2	2	2	2	2	2	2	2	2	2	2	2	2	-1	2	2	2	0	0	0	0	2	2	2	2	0	0	0	0	2
BM142	25620076	25655283	35207	0	0	2	2	0	0	2	2	2	2	0	0	2	2	2	2	2	2	2	2	2	2	2	2	2	2	2	2	2	-1	2	2	2	0	0	0	0	2	2	2	2	0	0	0	0	2
BM143	25655284	25688732	33448	0	0	2	2	0	0	2	2	2	2	0	0	2	2	2	2	2	2	2	2	2	2	2	2	2	2	2	2	2	-1	2	2	2	0	0	0	0	2	2	2	2	0	0	0	0	2
BM144	25688733	25756844	68111	0	0	2	2	0	0	2	2	2	2	0	0	2	2	2	2	2	2	2	2	2	2	2	2	2	2	2	2	2	-1	2	2	2	0	0	0	0	2	2	2	2	0	0	0	0	2
BM145	25756845	25823822	66977	0	0	2	2	0	0	2	2	2	2	0	0	2	2	2	2	2	2	2	2	2	2	2	2	2	2	2	2	2	-1	2	2	2	0	0	0	0	2	2	2	2	0	0	0	0	2
BM146	25823823	25843482	19659	0	0	2	2	0	0	2	2	2	2	0	0	2	2	2	2	2	0	2	2	2	2	2	2	2	2	2	2	2	-1	2	2	2	0	0	0	0	2	2	2	2	0	0	0	0	2
BM147	25843483	25886475	42992	0	0	2	2	0	0	2	2	2	2	0	0	2	2	2	2	2	0	2	2	2	2	2	2	2	2	2	2	2	-1	2	2	2	0	0	0	0	2	2	2	2	0	0	0	0	2
BM148	25886476	25990325	103849	0	0	2	2	0	0	2	2	2	2	0	-1	2	2	2	2	2	0	2	2	2	2	2	2	2	2	2	2	2	-1	2	2	2	0	0	0	0	2	2	2	2	0	0	0	0	2
BM149	25990326	26005761	15435	0	0	2	2	0	0	2	2	2	2	0	-1	2	2	2	2	2	0	2	2	2	2	2	2	2	2	2	2	2	-1	2	2	2	0	0	0	0	2	2	2	2	0	0	0	0	2
BM150	26005762	26046876	41114	0	0	2	2	0	0	2	2	2	2	0	-1	2	2	2	2	2	0	2	2	2	2	2	2	2	2	2	2	2	-1	2	2	2	0	0	0	0	2	2	2	2	0	0	0	0	2
BM151	26046877	26114265	67388	0	0	2	2	0	0	2	2	2	2	0	-1	2	2	2	2	2	0	2	2	2	2	2	2	2	2	2	2	2	-1	2	2	2	0	0	0	0	2	2	2	2	0	0	0	0	2
BM152	26114266	26209905	95639	0	0	2	2	0	0	2	2	2	2	0	0	2	2	2	2	2	0	2	2	2	2	2	2	2	2	2	2	2	-1	2	2	2	0	0	0	0	2	2	2	2	0	0	0	0	2
BM153	26209906	26215831	5925	0	0	2	2	0	0	2	2	2	2	0	0	2	2	2	2	2	0	2	2	2	2	2	2	2	2	2	2	2	-1	2	2	2	0	0	0	0	2	2	2	2	0	0	0	0	2
BM154	26215832	26280157	64325	0	0	2	2	0	0	2	2	2	2	0	0	2	2	2	2	2	0	2	2	2	2	2	2	2	2	2	2	2	-1	2	2	2	0	0	0	0	2	2	2	2	0	0	0	2	2
BM155	26280158	26316426	36268	0	0	2	2	0	0	2	2	2	2	0	0	2	2	2	2	2	0	2	2	2	2	2	2	2	2	2	2	2	-1	2	2	2	0	0	0	0	2	2	2	2	0	0	0	2	2
BM156	26316427	26386293	69866	0	0	2	2	0	0	2	2	2	2	0	0	2	2	2	2	2	0	2	2	2	2	2	2	2	2	2	2	2	-1	2	2	2	0	0	0	0	2	2	2	2	0	0	0	2	2
BM157	26386294	26471070	84776	0	0	2	2	0	0	2	2	2	2	0	0	2	2	2	2	2	0	2	2	2	2	2	2	2	2	2	2	2	-1	2	2	2	0	0	0	0	2	2	2	2	0	0	0	2	2
BM158	26471071	27194491	723420	0	0	2	2	0	0	2	2	2	2	0	0	2	2	2	2	2	0	2	2	2	2	2	2	2	2	2	2	2	-1	0	2	2	0	0	0	0	2	2	2	2	0	0	0	2	2
BM159	27194492	27309248	114756	0	0	2	2	0	0	2	2	2	2	0	0	2	2	2	2	2	0	2	2	2	2	2	2	2	2	-1	2	2	-1	0	2	2	0	0	0	0	2	2	2	2	0	0	0	2	2
BM160	27309249	27316786	7537	0	0	2	2	0	0	2	2	2	2	0	2	2	2	2	2	2	0	2	2	2	2	2	2	2	2	-1	2	2	-1	0	2	2	0	0	0	0	2	2	2	2	0	0	0	2	2
BM161	27316787	27730498	413711	0	0	2	2	0	0	2	2	2	2	0	2	2	2	2	2	2	2	2	2	2	2	2	2	2	2	-1	2	2	-1	0	2	2	0	0	0	0	2	2	2	2	0	0	0	2	2
BM162	27730499	27987914	257415	0	0	2	2	0	0	2	2	2	2	0	2	2	2	2	2	2	2	2	2	2	2	2	2	2	2	-1	2	2	-1	0	2	2	0	0	0	0	2	2	2	2	0	0	0	2	2
BM163	27987915	27993226	5311	0	0	2	2	0	0	2	2	2	2	0	2	2	2	2	2	2	2	2	2	2	2	2	2	2	2	-1	2	2	-1	0	2	2	0	0	0	0	2	2	2	2	0	0	0	2	2
BM164	27993227	28070747	77520	0	0	2	2	0	0	2	2	2	2	0	2	2	2	2	2	2	2	2	2	2	2	2	2	2	2	-1	2	2	-1	0	2	2	0	0	0	0	2	2	2	2	0	0	0	2	2
BM165	28070748	28210707	139959	0	0	2	2	0	0	2	2	2	2	0	2	2	2	2	2	2	2	2	2	2	2	2	2	2	2	-1	2	2	-1	0	2	2	0	0	0	0	2	2	2	2	0	0	0	2	2
BM166	28210708	28223404	12696	0	0	2	2	0	0	2	2	2	2	0	2	2	2	2	2	2	2	2	2	2	2	2	2	2	2	-1	2	2	-1	0	2	2	0	0	0	0	2	2	2	2	0	0	0	2	2
BM167	28223405	29399121	1175716	0	0	2	2	0	0	2	2	2	2	0	2	2	2	2	2	2	2	2	2	2	2	2	2	2	2	-1	2	2	-1	0	2	2	0	0	0	0	2	2	2	2	0	0	0	2	2
BM168	29399122	29979429	580307	0	0	2	2	0	0	2	2	2	2	0	2	2	2	2	2	2	2	2	2	2	2	2	2	2	2	-1	2	2	-1	0	2	2	0	0	0	0	2	2	2	2	0	0	0	2	2
BM169	29979430	30013348	33918	0	0	2	2	0	0	2	2	2	2	0	2	2	2	2	2	2	2	2	2	2	2	2	2	2	0	-1	2	2	-1	0	2	2	0	0	0	0	2	2	2	2	0	0	0	2	2
BM170	30013349	30141480	128131	0	0	2	2	0	0	2	2	2	2	0	2	2	2	2	2	2	2	2	2	2	2	2	2	2	0	-1	2	2	-1	0	2	2	0	0	0	0	2	2	2	2	0	0	0	2	2
BM171	30141481	30473056	331575	0	0	2	2	0	0	2	2	2	2	0	2	2	2	2	2	2	2	2	2	2	2	2	2	2	0	0	2	2	-1	0	2	2	0	0	0	0	2	2	2	2	0	0	0	2	2
BM172	30473057	30620744	147687	0	0	2	2	0	0	2	2	2	2	0	2	2	2	2	2	2	2	2	2	2	2	2	2	2	0	0	2	2	-1	0	2	2	0	0	0	0	2	2	2	2	0	0	0	2	2
BM173	30620745	30646175	25430	0	0	2	2	0	0	2	2	2	2	0	2	2	2	2	2	2	2	2	2	2	2	2	2	2	0	0	2	2	-1	0	2	2	0	0	0	0	2	2	2	2	0	0	0	2	2
BM174	30646176	30734927	88751	0	0	2	2	0	0	2	2	2	2	0	2	2	2	2	2	2	2	2	2	2	2	2	2	2	0	-1	2	2	-1	0	2	2	0	0	0	0	2	2	2	2	0	0	0	2	2
BM175	30734928	30800677	65749	0	0	2	2	0	0	2	2	2	2	0	2	2	2	2	2	2	2	2	2	2	2	2	2	2	0	-1	2	2	-1	0	2	2	0	0	0	0	2	2	2	2	0	0	0	2	2
BM176	30800678	31367310	566632	0	0	2	2	0	0	2	2	2	2	0	2	2	2	2	2	2	2	2	2	2	2	2	2	2	0	-1	2	2	-1	0	2	2	0	0	0	0	2	2	2	2	0	0	0	2	2
BM177	31367311	31499475	132164	0	0	2	2	0	0	2	2	2	2	0	2	2	2	2	2	2	2	2	2	2	2	2	2	2	0	-1	2	2	-1	0	2	2	0	0	0	0	2	2	2	2	0	0	0	2	2
BM178	31499476	31549202	49726	0	0	2	2	0	0	2	2	2	2	0	2	2	2	2	2	2	2	2	2	2	2	2	2	2	0	-1	2	2	-1	0	2	2	0	0	0	0	2	2	2	2	0	0	0	2	2
BM179	31549203	31705925	156722	0	0	2	2	0	0	2	2	2	2	0	2	2	2	2	2	2	2	2	2	2	2	2	2	2	0	2	2	2	-1	0	2	2	0	0	0	0	2	2	2	2	0	0	0	2	2
BM180	31705926	31717368	11442	0	0	2	2	0	0	2	2	2	2	0	2	2	0	2	2	2	2	2	2	2	2	2	2	2	0	2	2	2	-1	0	2	2	0	0	0	0	2	2	2	2	0	0	0	2	2
BM181	31717369	31771583	54214	0	0	2	2	0	0	2	2	2	2	0	2	2	0	2	2	2	2	2	2	2	2	2	2	2	0	2	2	2	-1	0	2	2	0	0	0	0	2	2	2	2	0	0	0	2	2
BM182	31771584	31795297	23713	0	0	2	2	0	0	2	2	2	2	0	2	2	0	2	2	2	2	2	2	2	2	2	2	2	0	2	2	2	-1	0	2	2	0	0	0	0	2	2	2	2	0	0	0	2	2
BM185	31795298	31923907	128609	2	0	2	2	0	0	2	2	2	2	0	2	2	0	2	2	2	2	2	2	2	2	2	2	2	0	2	2	2	-1	0	2	2	0	0	0	0	2	2	2	2	0	0	0	2	2
BM184	31923908	31969738	45830	2	0	2	2	0	0	2	2	2	2	0	2	2	0	2	2	2	2	2	2	2	2	2	2	2	0	2	2	2	-1	0	2	2	0	0	0	0	2	2	2	2	0	0	0	2	2
BM186	31969739	32141920	172181	2	0	2	2	0	0	2	2	2	2	0	2	2	0	2	2	2	2	2	2	2	2	2	2	2	0	2	2	2	-1	0	2	2	0	0	0	0	2	2	2	2	0	0	0	2	2
BM183	32141921	32256102	114181	2	0	2	2	0	0	2	2	2	2	0	2	2	0	2	2	2	2	2	2	2	2	2	2	2	0	2	2	2	-1	0	2	2	0	0	0	0	2	2	2	2	0	0	0	2	2
BM187	32256103	32961370	705267	2	0	2	2	0	0	2	2	2	2	0	2	2	0	2	2	2	2	2	2	2	2	2	2	2	0	2	2	2	-1	0	2	2	0	0	0	0	2	2	2	2	0	0	0	2	2
BM188	32961371	33115754	154383	2	0	2	2	0	0	2	2	2	2	0	2	2	0	2	2	2	2	2	2	2	2	2	2	2	0	2	2	2	-1	0	2	2	0	0	0	0	2	2	2	2	0	0	0	2	2
BM189	33115755	33136886	21131	2	0	2	2	0	0	2	2	2	2	0	2	2	0	2	2	2	2	2	2	2	2	2	2	2	0	2	2	2	-1	0	2	2	0	0	0	0	2	2	2	2	0	0	0	2	2
BM190	33136887	33176408	39521	2	0	2	2	0	0	2	2	2	2	0	2	2	0	2	2	2	2	2	2	2	2	2	2	2	0	2	2	2	-1	0	2	2	0	0	0	0	2	2	2	2	0	0	0	2	2
BM193	33176409	33295387	118978	2	0	2	2	0	0	2	2	2	2	0	2	2	0	2	2	2	2	2	2	2	2	2	2	2	0	2	2	2	-1	0	2	2	0	0	0	0	2	2	2	2	0	0	0	2	2
BM192	33295388	33359988	64600	2	0	2	2	0	0	2	2	2	2	0	2	2	0	2	2	2	2	2	2	2	2	2	2	2	0	2	2	2	-1	0	2	2	0	0	0	0	2	-1	2	2	0	0	0	2	2
BM194	33359989	33627469	267480	2	0	2	2	0	0	2	2	2	2	0	2	2	0	2	2	2	2	2	2	2	2	2	2	2	0	2	2	2	-1	0	2	2	0	0	0	0	2	-1	2	2	0	0	0	2	2
BM191	33627470	33644008	16538	2	0	2	2	0	0	2	2	2	2	0	2	2	0	2	2	2	2	2	2	2	2	2	2	2	0	2	2	2	-1	0	2	2	0	0	0	0	2	-1	2	2	0	0	0	2	2
BM195	33644009	33999181	355172	2	0	2	2	0	0	2	2	2	2	0	2	2	0	2	2	2	2	2	2	2	2	2	2	2	0	2	2	2	-1	0	2	2	0	0	0	0	2	2	2	2	0	0	0	2	2
BM196	33999182	34033209	34027	2	0	2	2	0	2	2	2	2	2	0	2	2	0	2	2	2	2	2	2	2	2	2	2	2	0	2	2	2	-1	0	2	2	0	0	0	0	2	2	2	2	0	0	0	2	2
BM197	34033210	34173744	140534	2	0	2	2	0	2	2	2	2	2	0	2	2	0	2	2	2	2	2	2	2	2	2	2	2	0	2	2	2	-1	0	2	2	0	0	0	0	2	2	2	2	0	0	0	2	2
BM198	34173745	34208778	35033	2	0	2	2	0	2	2	2	2	2	0	2	2	0	2	2	2	2	2	2	2	2	2	2	2	0	2	2	2	-1	0	2	2	0	0	0	0	2	2	2	2	0	0	0	2	2
BM199	34208779	34285826	77047	2	0	2	2	0	2	2	2	2	2	0	2	2	0	2	2	2	2	2	2	2	2	2	2	2	0	2	2	2	-1	0	2	2	0	0	0	0	2	2	2	2	0	0	0	2	2
BM200	34285827	34292310	6483	2	0	2	2	0	2	2	2	2	2	0	2	2	0	2	2	2	2	2	2	2	2	2	2	2	0	2	2	2	-1	0	2	2	0	0	0	0	2	2	2	2	0	0	0	2	2
BM201	34292311	34317981	25670	2	0	2	2	0	2	2	2	2	2	0	2	2	0	2	2	2	2	2	2	2	2	2	2	2	0	2	2	2	-1	0	2	2	0	0	0	0	2	2	2	2	0	0	0	2	2
BM202	34317982	34546933	228951	2	0	2	2	0	2	2	2	2	2	0	2	2	0	0	2	2	2	2	2	2	2	2	2	2	0	2	2	2	-1	0	2	2	0	0	0	0	2	2	2	2	0	0	0	2	2
BM203	34546934	34564592	17658	2	0	2	2	0	2	2	2	2	2	0	2	2	0	0	2	2	2	2	2	2	2	2	2	2	0	2	2	2	-1	0	2	2	0	0	0	0	2	2	2	2	0	0	0	2	2
BM205	34564593	34643021	78428	2	0	2	2	0	2	2	2	2	2	0	2	2	0	0	2	2	2	2	2	2	2	2	2	2	0	2	2	2	-1	0	2	2	0	0	0	0	2	2	2	2	0	0	0	2	2
BM206	34643022	34891033	248011	2	0	2	2	0	2	2	2	2	2	0	2	2	0	0	2	2	2	2	2	2	2	2	2	2	0	2	2	2	-1	0	2	2	0	0	0	0	2	2	2	2	0	0	0	2	2
BM207	34891034	34942633	51599	2	0	2	2	0	2	2	2	2	2	0	2	2	0	0	2	2	2	2	2	2	2	2	2	2	0	2	2	2	-1	0	2	2	0	0	0	0	2	2	2	2	0	0	0	2	2
BM208	34942634	34962202	19568	2	0	2	2	0	2	2	2	2	2	0	2	2	0	0	2	2	2	2	2	2	2	2	2	2	0	2	2	2	-1	0	2	2	0	0	0	0	2	2	2	2	0	0	0	2	2
BM209	34962203	34984128	21925	2	0	2	2	0	2	2	2	2	2	0	2	2	0	0	2	2	2	2	2	2	2	2	2	2	0	2	2	2	-1	0	2	2	0	0	0	0	2	2	2	2	0	0	0	2	2
BM204	34984129	35025981	41852	2	0	2	2	0	2	2	2	2	2	0	2	2	0	0	2	2	2	2	2	2	2	2	2	2	0	2	2	2	-1	0	2	2	0	0	0	0	2	2	2	2	0	0	0	2	2
BM210	35025982	35172567	146585	2	0	2	2	0	2	2	2	2	2	0	2	2	0	0	2	2	2	2	2	2	2	2	2	2	0	2	2	2	-1	0	2	2	0	0	0	0	2	2	2	2	0	0	0	2	2
BM211	35172568	35459982	287414	2	0	2	2	0	2	2	2	2	2	0	2	2	0	0	2	2	2	2	2	2	2	2	2	2	0	2	2	2	-1	0	2	2	0	0	0	0	2	2	2	2	0	0	0	2	2
BM212	35459983	35490660	30677	2	0	2	2	0	2	2	2	2	2	0	2	2	0	0	2	2	2	2	2	2	2	2	2	2	0	2	2	2	-1	0	2	2	0	0	0	0	2	2	2	2	0	0	0	2	2
BM214	35490661	35571796	81135	2	0	2	2	0	2	2	2	2	2	0	2	2	0	0	2	2	2	2	2	2	2	2	2	2	0	2	2	2	-1	0	2	2	0	0	0	0	2	-1	2	2	0	0	0	2	2
BM215	35571797	35613279	41482	2	0	2	2	0	2	2	2	2	2	0	2	2	0	0	2	2	2	2	2	2	2	2	2	2	0	2	2	2	-1	0	2	2	0	0	0	0	2	2	2	2	0	0	0	2	2
BM216	35613280	35642756	29476	2	0	2	2	0	2	2	2	2	2	0	2	2	0	0	2	2	2	2	2	2	2	2	2	2	0	2	2	2	-1	0	2	2	0	0	0	0	2	2	2	2	0	0	0	2	2
BM213	35642757	35808688	165931	2	0	2	2	0	2	2	2	2	2	0	2	2	0	0	2	2	2	2	2	2	2	2	2	2	0	2	2	2	-1	0	2	2	0	0	0	0	2	2	2	2	0	0	0	2	2
BM217	35808689	35971634	162945	2	0	2	2	0	2	2	2	2	2	0	2	2	0	0	2	2	2	2	2	2	2	2	2	2	0	2	2	2	-1	0	2	2	0	0	0	0	2	2	2	2	0	0	0	2	2
BM218	35971635	36173239	201604	2	0	2	2	0	2	2	2	2	2	0	2	2	0	0	2	2	2	2	2	2	2	2	2	2	0	2	2	2	-1	0	2	2	0	0	0	0	2	2	2	2	0	0	0	2	2
BM219	36173240	36206272	33032	2	0	2	2	0	2	2	2	2	2	0	2	2	0	0	2	2	2	2	2	2	2	2	2	2	0	2	2	2	-1	0	2	2	0	0	0	0	2	-1	2	2	0	0	0	2	2
BM220	36206273	36265056	58783	2	0	2	2	0	2	2	2	2	2	0	2	2	0	0	2	2	2	2	2	2	2	2	2	2	0	2	2	2	-1	0	2	2	0	0	0	0	2	-1	2	2	0	0	0	2	2
BM221	36265057	36346399	81342	2	0	2	2	0	2	2	2	2	2	0	2	2	0	0	2	2	2	2	2	2	2	2	2	2	0	2	2	2	-1	0	2	2	0	0	0	0	2	2	2	2	0	0	0	2	2
BM222	36346400	36458796	112396	2	0	2	2	0	2	2	2	2	2	0	2	2	0	0	2	2	2	2	2	2	2	2	2	2	0	2	2	2	-1	0	2	2	0	0	0	0	2	2	2	2	0	0	0	2	2
BM223	36458797	36486232	27435	2	0	2	2	0	2	2	2	2	2	0	2	2	0	0	2	2	2	2	2	2	2	2	2	2	0	2	2	2	-1	0	2	2	0	0	0	0	2	2	2	2	0	0	0	2	2
BM224	36486233	36512276	26043	2	0	2	2	0	2	2	2	2	2	0	2	2	0	0	2	2	2	2	2	2	2	2	2	2	0	2	2	2	-1	0	2	2	0	0	0	0	2	2	2	2	0	0	0	2	2
BM225	36512277	36731362	219085	2	0	2	2	0	2	2	2	2	2	0	2	2	0	0	2	2	2	2	2	2	2	2	2	2	0	2	2	2	-1	0	2	2	0	0	0	0	2	2	2	2	0	0	0	2	2
BM226	36731363	36868805	137442	2	0	2	2	0	2	2	2	2	2	0	2	2	0	0	2	2	2	2	2	2	2	2	2	2	0	2	2	2	-1	0	2	2	0	0	0	0	2	2	2	2	0	0	0	2	2
BM227	36868806	37056845	188039	2	0	2	2	0	2	2	2	2	2	0	2	2	0	0	2	2	2	2	2	2	2	2	2	2	0	2	2	2	-1	0	2	2	0	0	0	0	2	2	2	2	0	0	0	2	2
BM228	37056846	37091373	34527	2	0	2	2	0	2	2	2	2	2	0	2	2	0	0	2	2	2	2	2	2	2	2	2	2	0	2	2	2	-1	0	2	2	0	0	0	0	2	2	2	2	0	0	0	2	2
BM229	37091374	37575658	484284	2	0	2	2	0	2	2	2	2	2	0	2	2	0	0	2	2	2	2	2	2	2	2	2	2	0	2	2	2	-1	0	2	2	0	0	0	0	2	2	2	2	0	0	0	2	2
BM232	37575659	37599133	23474	2	0	2	2	0	2	2	2	2	2	0	2	2	0	0	2	2	2	2	2	2	2	2	2	2	0	2	2	2	-1	0	2	2	0	0	0	0	2	2	2	2	0	0	0	2	2
BM231	37599134	37607748	8614	2	0	2	2	0	2	2	2	2	2	0	2	2	0	0	2	2	2	2	2	2	2	2	2	2	0	2	2	2	-1	0	2	2	0	0	0	0	2	2	2	2	0	0	0	2	2
BM233	37607749	37669580	61831	2	0	2	2	0	2	2	2	2	2	0	2	2	0	0	2	2	2	2	2	2	2	2	2	2	0	2	2	2	-1	0	2	2	0	0	0	0	2	-1	2	2	0	0	0	2	2
BM230	37669581	38227651	558070	2	0	2	2	0	2	2	2	2	2	0	2	2	0	0	2	2	2	2	2	2	2	2	2	2	0	2	2	2	-1	0	2	2	0	0	0	0	2	2	2	2	0	0	0	2	2
BM234	38227652	38349337	121685	2	0	2	2	0	2	2	2	2	2	0	2	2	0	0	2	2	2	2	2	2	2	2	2	2	0	2	2	2	-1	0	2	2	0	0	0	0	2	2	2	2	0	0	0	2	2
BM236	38349338	38503089	153751	2	0	2	2	0	2	2	2	2	2	0	2	2	0	0	2	2	2	2	2	2	2	2	2	2	0	2	2	2	-1	0	2	2	0	0	0	0	2	2	2	2	0	0	0	2	2
BM237	38503090	38729803	226713	2	0	2	2	0	2	2	2	2	2	0	2	2	0	0	2	2	2	2	2	2	2	2	2	2	0	2	2	2	-1	0	2	2	0	0	0	0	2	2	2	2	0	0	0	2	2
BM238	38729804	38819625	89821	2	0	2	2	0	2	2	2	2	2	0	2	2	0	0	2	2	2	2	2	2	2	2	2	2	0	2	2	2	-1	0	2	2	0	0	0	0	2	-1	2	2	0	0	0	2	2
BM235	38819626	38853575	33949	2	0	2	2	0	2	2	2	2	2	0	2	2	0	0	2	2	2	2	2	2	2	2	2	2	0	2	2	2	-1	0	2	2	0	0	0	0	2	-1	2	2	0	0	0	2	2
BM239	38853576	39122550	268974	2	0	2	2	0	2	2	2	2	2	0	2	2	0	0	2	2	2	2	2	2	2	2	2	2	0	2	2	2	-1	0	2	2	0	0	0	0	2	2	2	2	0	0	0	2	2
BM240	39122551	39802047	679496	2	0	2	2	0	2	2	2	2	2	0	2	2	0	0	2	2	2	2	2	2	2	2	2	2	0	2	2	2	-1	0	2	2	0	0	0	0	2	2	2	2	0	0	0	2	2
BM241	39802048	40207807	405759	2	0	2	2	0	2	2	2	2	2	0	2	2	0	0	2	2	2	2	2	2	2	2	2	2	0	2	2	2	-1	0	2	2	0	0	0	0	2	2	2	2	0	0	0	2	2
BM242	40207808	40300379	92571	2	0	2	2	0	2	2	2	2	2	0	2	2	0	0	2	2	2	2	2	2	2	2	2	2	0	2	2	2	2	0	2	2	0	0	0	0	2	2	2	2	0	0	0	2	2
BM243	40300380	40385572	85192	2	0	2	2	0	2	2	2	2	2	0	2	2	0	0	2	2	2	2	2	2	2	2	2	2	0	2	2	2	2	0	2	2	0	0	0	0	2	2	2	2	0	0	0	2	2
BM244	40385573	40391761	6188	2	0	2	2	0	2	2	2	2	2	0	2	2	0	0	2	2	2	2	2	2	2	2	2	2	0	2	2	2	2	0	2	2	0	0	0	0	2	2	2	2	0	0	0	2	2
BM245	40391762	40481448	89686	2	0	2	2	0	2	2	2	2	2	0	2	2	0	0	2	2	2	2	2	2	2	2	2	2	0	2	2	2	2	0	2	2	0	0	0	0	2	2	2	2	0	0	0	2	2
BM246	40481449	40899528	418079	2	0	2	2	0	2	2	2	2	2	0	2	2	0	0	2	2	2	2	2	2	2	2	2	2	0	2	2	2	2	0	2	2	0	0	0	0	2	2	2	2	0	0	0	2	2
BM247	40899529	40910478	10949	2	0	2	2	0	2	2	2	2	2	2	2	2	0	0	2	2	2	2	2	2	2	2	2	2	0	2	2	2	2	0	2	2	0	0	0	0	2	2	2	2	0	0	0	2	2
BM248	40910479	41004820	94341	2	0	2	2	0	2	2	2	2	2	2	2	2	0	0	2	2	2	2	2	2	2	2	2	2	0	2	2	2	2	0	2	2	0	0	0	0	2	2	2	2	0	0	0	2	2
BM249	41004821	41011866	7045	2	2	2	2	0	2	2	2	2	2	2	2	2	0	0	2	2	2	2	2	2	2	2	2	2	0	2	2	2	2	0	2	2	0	0	0	0	2	2	2	2	0	0	0	2	2
BM250	41011867	41018488	6621	2	2	2	2	0	2	2	2	2	2	2	2	2	0	0	2	2	2	2	2	2	2	2	2	2	0	2	2	2	2	0	2	2	0	0	0	0	2	2	2	2	0	0	0	2	2
BM251	41018489	41026347	7858	2	2	2	2	0	2	2	2	2	2	2	2	2	0	0	2	2	2	2	2	2	2	2	2	2	0	2	2	2	2	0	2	2	0	0	0	0	2	2	2	2	0	0	0	2	2
BM253	41026348	41048786	22438	2	2	2	2	0	2	2	2	2	2	2	2	2	0	0	2	2	2	2	2	2	2	2	2	2	0	2	2	2	2	0	2	2	0	0	0	0	2	2	2	2	0	0	0	2	2
BM252	41048787	41183533	134746	2	2	2	2	0	2	2	2	2	2	2	2	2	0	0	2	2	2	2	2	2	2	2	2	2	0	2	2	2	2	0	2	2	0	0	0	0	2	-1	2	2	0	0	0	2	2
BM254	41183534	41506339	322805	2	2	2	2	0	2	2	2	2	2	2	2	2	0	0	2	2	2	2	2	2	2	2	2	2	0	2	2	2	2	0	2	2	0	0	0	0	2	2	2	2	0	0	0	2	2
BM255	41506340	41668962	162622	2	2	2	2	0	2	2	2	2	2	2	2	2	0	0	2	2	2	2	2	2	2	2	2	2	0	2	2	2	2	0	2	2	0	0	0	0	2	2	2	2	0	0	0	2	2
BM256	41668963	41710568	41605	2	2	2	2	0	2	2	2	2	2	2	2	2	0	0	2	2	2	2	2	2	2	2	2	2	0	2	2	2	2	0	2	2	0	0	0	0	2	2	2	2	0	0	0	2	2
BM257	41710569	41795901	85332	2	2	2	2	0	2	2	2	2	2	2	2	2	0	0	2	2	2	2	2	2	2	2	2	2	0	2	2	2	2	0	2	2	0	0	0	0	2	2	2	2	0	0	0	2	2
BM258	41795902	42261655	465753	2	2	2	2	0	2	2	2	2	2	2	2	2	0	0	2	2	2	2	2	2	2	2	2	2	0	2	2	2	2	0	2	2	0	0	0	0	2	2	2	2	0	0	0	2	2
BM259	42261656	42303521	41865	2	2	2	2	0	2	2	2	2	2	2	2	2	0	0	2	2	2	2	2	2	2	2	2	2	0	2	2	2	2	0	2	2	0	0	0	0	2	0	2	2	0	0	0	2	2
BM260	42303522	42312660	9138	2	2	2	2	0	2	2	2	2	2	2	2	2	0	0	2	2	2	2	2	2	2	2	2	2	0	2	2	2	2	0	2	2	0	0	0	0	2	0	2	2	0	0	0	2	2
BM261	42312661	43053820	741159	2	2	2	2	0	2	2	2	2	2	2	2	2	0	0	2	2	2	2	2	2	2	2	2	2	0	2	2	2	2	0	2	2	0	0	0	0	2	0	2	2	0	0	0	2	2
BM262	43053821	43631636	577815	2	2	2	2	0	2	2	2	2	2	2	2	2	0	0	2	2	2	2	2	2	2	2	2	2	0	2	2	2	2	0	2	2	0	0	0	0	2	0	2	2	0	0	0	2	0
BM263	43631637	43736210	104573	2	2	2	2	0	2	2	2	2	2	2	2	2	0	0	2	2	2	2	2	2	2	2	2	2	0	2	2	2	2	0	2	2	0	0	0	0	2	0	2	2	0	0	0	2	0
BM264	43736211	43803645	67434	2	2	2	2	0	2	2	2	2	2	2	2	2	0	0	2	2	2	2	2	2	2	2	2	2	0	2	2	2	2	0	2	2	0	0	0	0	2	0	2	2	0	0	0	2	0
BM265	43803646	45014760	1211114	2	2	2	2	0	2	2	2	2	2	2	2	2	0	0	2	2	2	2	2	2	2	2	2	2	0	2	2	2	2	0	2	2	0	0	0	0	2	0	2	2	0	0	0	2	0
BM266	45014761	45132313	117552	2	2	2	2	0	2	2	2	2	2	2	2	2	0	0	2	2	2	2	2	2	2	2	2	2	0	2	2	2	2	0	2	2	0	0	0	0	2	0	0	2	0	0	0	2	0
BM267	45132314	45148148	15834	2	2	2	2	0	2	2	2	2	2	2	2	2	0	0	2	2	2	2	2	2	2	2	2	2	0	2	2	2	2	0	2	2	0	0	0	0	2	0	0	2	0	0	0	2	0
BM268	45148149	45334796	186647	2	2	2	2	0	2	2	2	2	2	2	2	2	0	0	2	2	2	2	2	2	2	2	2	2	0	2	2	2	2	0	2	2	0	0	0	0	2	0	0	2	0	0	0	2	0
BM269	45334797	45384336	49539	2	2	2	2	0	2	2	2	2	2	2	2	2	0	0	2	2	2	2	2	2	2	2	2	2	0	2	2	2	2	0	2	2	0	0	0	0	2	0	0	2	0	0	0	2	0
BM270	45384337	45553318	168981	2	2	2	2	0	2	2	2	2	2	2	2	2	0	0	2	2	2	2	2	2	2	2	2	2	0	2	2	2	2	0	2	2	0	0	0	0	2	0	0	2	0	0	0	2	0
BM271	45553319	46594732	1041413	2	2	2	2	0	2	2	2	2	2	2	2	2	0	0	2	2	2	2	2	2	2	2	2	2	0	2	2	2	2	0	2	2	0	0	0	0	2	0	0	2	0	0	0	2	0
BM272	46594733	46608705	13972	2	2	2	2	0	2	2	2	2	2	2	2	2	0	0	2	2	2	2	2	0	2	2	2	2	0	2	2	2	2	0	2	2	0	0	0	0	2	0	0	2	0	0	0	2	0
BM273	46608706	46717671	108965	2	2	2	2	0	2	2	2	2	2	2	2	2	0	0	2	2	2	2	2	0	2	2	2	2	0	2	2	2	2	0	2	2	0	0	0	0	2	0	0	2	0	0	0	2	0
BM274	46717672	46953588	235916	2	2	2	2	0	2	2	2	2	2	2	2	2	0	0	2	2	2	2	2	0	2	2	2	2	0	2	2	2	2	0	2	2	0	0	0	0	2	0	0	2	0	0	0	2	0
BM275	46953589	47206280	252691	2	2	2	2	0	2	2	2	2	2	2	2	2	0	0	0	2	2	2	2	0	2	2	2	2	0	2	2	2	2	0	2	2	0	0	0	0	2	0	0	2	0	0	0	2	0
BM276	47206281	47397482	191201	2	2	2	2	0	2	2	2	2	2	2	2	2	0	0	0	2	2	2	2	0	2	2	2	2	0	-1	2	2	2	0	2	2	0	0	0	0	2	0	0	2	0	0	0	2	0
BM278	47397483	47545060	147577	2	2	2	2	0	2	2	2	2	2	2	2	2	0	0	0	2	2	2	2	0	2	2	2	2	0	-1	2	2	2	0	2	2	0	0	0	0	2	0	0	2	0	0	0	2	0
BM279	47545061	47799518	254457	2	2	2	2	0	2	2	2	2	2	2	2	2	0	0	0	2	2	2	2	0	2	2	2	2	0	-1	2	2	2	0	2	2	0	0	0	0	2	0	0	2	0	0	0	2	0
BM280	47799519	47866671	67152	2	2	2	2	0	2	2	2	2	2	2	2	2	0	0	0	2	2	2	2	0	2	2	2	2	0	-1	2	2	2	0	2	2	0	0	0	0	2	0	0	2	0	0	0	2	0
BM277	47866672	48404242	537570	2	2	2	2	0	2	2	2	2	2	2	2	2	0	0	0	2	2	2	2	0	2	2	2	2	0	-1	2	2	2	0	2	2	0	0	0	0	2	0	0	2	0	0	0	2	0
BM281	48404243	48712436	308193	2	2	2	2	0	2	2	2	2	2	2	2	2	0	0	0	2	2	2	2	0	2	2	2	2	0	-1	2	2	2	0	2	2	0	0	0	0	2	0	0	2	0	0	0	2	0
BM282	48712437	48971848	259411	2	2	2	2	0	2	2	2	2	2	2	2	2	0	0	0	2	2	2	2	0	2	2	2	2	0	-1	2	2	2	0	2	2	0	0	0	0	2	0	0	2	0	0	0	2	0
BM283	48971849	48989577	17728	2	2	2	2	0	2	2	2	2	2	2	2	2	0	0	0	2	2	2	2	0	2	2	2	2	0	-1	2	2	2	0	2	2	0	0	0	0	2	0	0	2	0	0	0	2	0
BM284	48989578	49017743	28165	2	2	2	2	0	2	2	2	2	2	2	2	2	0	0	0	2	2	2	2	0	2	2	2	2	0	-1	2	2	2	0	2	2	0	0	0	0	2	0	0	2	0	0	0	2	0
BM286	49017744	49222179	204435	2	2	2	2	0	2	2	2	2	2	2	2	2	0	0	0	2	2	2	2	0	2	2	2	2	0	-1	2	2	2	0	2	2	0	0	0	0	2	0	0	2	0	0	0	2	0
BM287	49222180	49331862	109682	2	2	2	2	0	2	2	2	2	2	2	2	2	0	0	0	2	2	2	2	0	2	2	2	2	0	-1	2	2	2	0	2	2	0	0	0	0	2	0	0	2	0	0	0	2	0
BM285	49331863	49800052	468189	2	2	2	2	0	2	2	2	2	2	2	2	2	0	0	0	2	2	2	2	0	2	2	2	2	0	-1	2	2	2	0	2	2	0	0	0	0	2	0	0	2	0	0	0	2	0
BM288	49800053	49951939	151886	2	2	2	2	0	2	2	2	2	2	2	2	2	0	0	0	2	2	2	2	0	2	2	2	2	0	-1	2	2	2	0	2	2	0	0	0	0	2	0	0	2	0	0	0	2	0
BM289	49951940	49973209	21269	2	2	2	2	0	2	2	2	2	2	2	2	2	0	0	0	2	2	2	2	0	2	2	2	2	0	-1	2	2	2	0	2	2	0	0	0	0	2	0	0	2	0	0	0	2	0
BM290	49973210	50191834	218624	2	2	2	2	0	2	2	2	2	2	2	2	2	0	0	0	2	2	2	2	0	2	2	2	2	0	-1	2	2	2	0	2	2	0	0	0	0	2	0	0	2	0	0	0	2	0
BM291	50191835	50338758	146923	2	2	2	2	0	2	2	2	2	2	2	2	2	0	0	0	2	2	2	2	0	2	2	2	2	0	-1	2	2	2	0	2	2	0	0	0	0	2	0	0	2	0	0	0	2	0
BM292	50338759	50391602	52843	2	2	2	2	0	2	2	2	2	2	2	2	2	0	0	0	2	2	2	2	0	2	2	2	2	0	-1	2	2	2	0	2	2	0	0	0	0	2	0	0	2	0	0	0	2	0
BM293	50391603	50401704	10101	2	2	2	2	0	2	2	2	2	2	2	2	2	0	0	0	2	2	2	2	0	2	2	2	2	0	-1	2	2	2	0	2	2	0	0	0	0	2	0	0	2	0	0	0	2	0
BM294	50401705	51445733	1044028	2	2	2	2	0	2	2	2	2	2	2	2	2	0	0	0	2	2	2	2	0	2	2	2	2	0	-1	2	2	2	0	2	2	0	0	0	0	2	0	0	2	0	0	0	2	0
BM295	51445734	51631742	186008	2	2	2	2	0	2	2	2	2	2	2	2	2	0	0	0	2	2	2	2	0	2	2	2	2	0	-1	2	2	2	0	2	2	0	0	0	0	2	0	0	2	0	0	0	2	0
BM296	51631743	52129893	498150	2	2	2	2	0	2	2	2	2	2	2	2	2	0	0	0	2	2	2	2	0	2	2	2	2	0	-1	2	2	2	0	2	2	0	0	0	0	2	0	0	2	0	0	0	2	0
BM297	52129894	52559917	430023	2	2	2	2	0	2	2	2	2	2	2	2	2	0	2	0	2	2	2	2	0	2	2	2	2	0	-1	2	2	2	0	2	2	0	0	0	0	2	0	0	2	0	0	0	2	0
BM298	52559918	52694136	134218	2	2	2	2	0	2	2	2	2	2	2	2	2	0	2	0	-1	2	2	2	0	2	2	2	2	0	-1	2	2	2	0	2	2	0	0	0	0	2	0	0	2	0	0	0	2	0
BM299	52694137	53035008	340871	2	2	2	2	0	2	2	2	2	2	2	2	2	0	2	0	-1	2	2	2	0	2	2	2	2	0	-1	2	2	2	0	2	2	0	0	0	0	2	0	0	2	0	0	0	2	0
BM300	53035009	53280191	245182	2	2	2	2	0	2	2	2	2	2	2	2	2	0	2	0	-1	2	2	2	0	2	2	2	2	0	-1	2	2	2	0	2	2	0	0	0	0	2	0	0	2	0	0	0	2	0
BM301	53280192	54382875	1102683	2	2	2	2	0	2	2	2	2	2	2	2	2	0	2	0	-1	2	2	2	0	2	2	2	2	0	-1	2	2	2	0	2	2	0	0	0	0	2	0	0	2	0	0	0	2	0
BM302	54382876	54716923	334047	2	2	2	2	0	2	2	2	2	2	2	2	2	0	2	0	-1	2	2	2	0	2	2	2	2	0	-1	2	2	2	0	2	2	0	0	0	0	2	0	0	2	0	0	0	2	0
BM303	54716924	54860043	143119	2	2	2	2	0	2	2	2	2	2	2	2	2	0	2	0	-1	2	2	2	0	2	2	2	2	0	-1	2	2	2	0	2	2	0	0	0	0	2	0	0	2	0	0	0	2	0
BM304	54860044	54882293	22249	2	2	2	2	0	2	2	2	2	2	2	2	2	0	2	0	-1	2	2	2	0	2	2	2	2	0	2	2	2	2	0	2	2	0	0	0	0	2	0	0	2	0	0	0	2	0
BM305	54882294	55254949	372655	2	2	2	2	0	2	2	2	2	2	2	2	2	0	2	0	-1	2	2	2	0	2	2	2	2	0	2	2	2	2	0	2	2	0	0	0	0	2	0	0	2	0	0	0	2	0
BM306	55254950	55349878	94928	2	2	2	2	0	2	2	2	2	2	2	2	2	0	2	0	-1	2	2	2	0	2	2	2	2	0	2	2	2	2	0	2	2	0	0	0	0	2	0	0	2	0	0	0	2	0
BM307	55349879	55631534	281655	2	2	2	2	0	2	2	2	2	2	2	2	2	0	2	0	-1	2	2	2	0	2	2	2	2	0	2	2	2	2	0	2	2	0	0	0	0	2	0	0	2	0	0	0	2	0
BM308	55631535	55795223	163688	2	2	2	2	0	2	2	2	2	2	2	2	2	0	2	0	-1	2	2	2	0	2	2	2	2	0	2	2	2	2	0	2	2	0	0	0	0	2	0	0	2	0	0	0	2	0
BM309	55795224	55911494	116270	2	2	2	2	0	2	2	2	2	2	2	2	2	0	2	0	-1	2	2	2	0	2	2	2	2	0	-1	2	2	2	0	2	2	0	0	0	0	2	0	0	2	0	0	0	2	0
BM310	55911495	55917651	6156	2	2	2	2	0	2	2	2	2	2	2	2	2	0	2	0	-1	2	2	2	0	2	2	2	2	0	-1	2	2	2	0	2	2	0	0	0	0	2	0	0	2	0	0	0	2	0
BM311	55917652	55934076	16424	2	2	2	2	0	2	2	2	2	2	2	2	2	0	2	0	-1	2	2	2	0	2	2	2	2	0	-1	2	2	2	0	2	2	0	0	0	0	2	0	0	2	0	0	0	2	0
BM312	55934077	56000718	66641	2	2	2	2	0	2	2	2	2	2	2	2	2	0	2	0	-1	2	2	2	0	2	2	2	2	0	-1	2	2	2	0	2	2	0	0	0	0	2	0	2	2	0	0	0	2	0
BM313	56000719	56006139	5420	2	2	2	2	0	2	2	2	2	2	2	2	2	0	2	0	-1	2	2	2	0	2	2	2	2	0	2	2	2	2	0	2	2	0	0	0	0	2	0	2	2	0	0	0	2	0
BM315	56006140	56071585	65445	2	2	2	2	0	2	2	2	2	2	2	2	2	0	2	0	-1	2	2	2	0	2	2	2	2	0	2	2	2	2	0	2	2	0	0	0	0	2	0	2	2	0	0	0	2	0
BM314	56071586	56104634	33048	2	2	2	2	0	2	2	2	2	2	2	2	2	0	2	0	-1	2	2	2	0	2	2	2	2	0	2	2	2	2	0	2	2	0	0	0	0	2	0	2	2	0	0	0	2	0
BM317	56104635	56251714	147079	2	2	2	2	0	2	2	2	2	2	2	2	2	0	2	0	-1	2	2	2	0	2	2	2	2	0	-1	2	2	2	0	2	2	0	0	0	0	2	0	2	2	0	0	0	2	0
BM316	56251715	56507039	255324	2	2	2	2	0	2	2	2	2	2	2	2	2	0	2	0	-1	2	2	2	0	2	2	2	2	0	-1	2	2	2	0	2	2	0	0	0	0	2	0	2	2	0	0	0	2	0
BM318	56507040	56527705	20665	2	2	2	2	0	2	2	2	2	2	2	2	2	0	2	0	-1	2	2	2	0	2	2	2	2	0	-1	2	2	2	0	2	2	0	0	0	0	2	0	2	2	0	0	0	2	0
BM319	56527706	56532866	5160	2	2	2	2	0	2	2	2	2	2	2	2	2	0	2	0	-1	2	2	2	0	2	2	2	2	0	-1	2	2	2	0	2	2	0	0	0	0	2	0	2	2	0	0	0	2	0
BM320	56532867	56559232	26365	2	2	2	2	0	2	2	2	2	2	2	2	2	0	2	0	-1	2	2	2	0	2	2	2	2	0	-1	2	2	2	0	2	2	0	0	0	0	2	0	2	2	0	0	0	2	0
BM321	56559233	56758876	199643	2	2	2	2	2	2	2	2	2	2	2	2	2	0	2	0	-1	2	2	2	0	2	2	2	2	0	-1	2	2	2	0	2	2	0	0	0	0	2	0	2	2	0	0	0	2	0
BM322	56758877	56777597	18720	2	2	2	2	2	2	2	2	2	2	2	2	2	0	2	0	-1	2	2	2	0	2	2	2	2	0	-1	2	2	2	0	2	2	0	0	0	0	2	0	2	2	0	0	0	2	0
BM323	56777598	56872241	94643	2	2	2	2	2	2	2	2	2	2	2	2	2	0	2	0	-1	2	2	2	0	2	2	2	2	0	0	2	2	2	0	2	2	0	0	0	0	2	0	2	2	0	0	0	2	0
BM324	56872242	56901105	28863	2	2	2	2	2	2	2	2	2	2	2	2	2	0	2	0	-1	2	2	2	0	2	2	2	2	0	0	2	2	2	0	2	2	0	0	0	0	2	0	2	2	0	0	0	2	0
BM329	56901106	56946550	45444	2	2	2	2	2	2	2	2	2	2	2	2	2	0	2	0	-1	2	2	2	0	2	2	2	2	0	0	2	2	2	0	2	2	0	0	0	0	2	0	2	2	0	0	0	2	0
BM328	56946551	57028955	82404	2	2	2	2	2	2	2	2	2	2	2	2	2	0	2	0	-1	2	2	2	0	2	2	2	2	0	-1	2	2	2	0	2	2	0	0	0	0	2	0	2	2	0	0	0	2	0
BM327	57028956	57106156	77200	2	2	2	2	2	2	2	2	2	2	2	2	2	0	2	0	-1	2	2	2	0	2	2	2	2	0	-1	2	2	2	0	2	2	0	0	0	0	2	0	2	2	0	0	0	2	0
BM326	57106157	57118082	11925	2	2	2	2	2	2	2	2	2	2	2	2	2	0	2	0	-1	2	2	2	0	2	2	2	2	0	0	2	2	2	0	2	2	0	0	0	0	2	0	2	2	0	0	0	2	0
BM325	57118083	57251569	133486	2	2	2	2	2	2	2	2	2	2	2	2	2	0	2	0	-1	2	2	2	0	2	2	2	2	0	0	2	2	2	0	2	2	0	0	0	0	2	0	2	2	0	0	0	2	0
BM330	57251570	57806295	554725	2	2	2	2	2	2	2	2	2	2	2	2	2	0	2	0	-1	2	2	2	0	2	2	2	2	0	0	2	2	2	0	2	2	0	0	0	0	2	0	2	2	0	0	0	2	0
BM331	57806296	57930597	124301	2	2	2	2	2	2	2	2	2	2	2	2	2	0	2	0	-1	2	2	2	0	2	2	2	2	0	0	2	2	2	0	2	2	0	0	0	0	2	0	2	2	0	0	2	2	0
BM334	57930598	58171951	241353	2	2	2	2	2	2	2	2	2	2	2	2	2	0	2	0	-1	2	2	2	0	2	2	2	2	0	2	2	2	2	0	2	2	0	0	0	0	2	0	2	2	0	0	2	2	0
BM333	58171952	58287999	116047	2	2	2	2	2	2	2	2	2	2	2	2	2	0	2	0	-1	2	2	2	0	2	2	2	2	0	2	2	2	2	0	2	2	0	0	0	0	2	0	2	2	0	0	2	2	0
BM335	58288000	58751465	463465	2	2	2	2	2	2	2	2	2	2	2	2	2	0	2	0	-1	2	2	2	0	2	2	2	2	0	2	2	2	2	0	2	2	0	0	0	0	2	-1	2	2	0	0	2	2	0
BM332	58751466	58765885	14419	2	2	2	2	2	2	2	2	2	2	2	2	2	0	2	0	-1	2	2	2	0	2	2	2	2	0	2	2	2	2	0	2	2	0	0	0	0	2	0	2	2	0	0	2	2	0
BM336	58765886	58801971	36085	2	2	2	2	2	2	2	2	2	2	2	2	2	0	2	0	-1	2	2	2	0	2	2	2	2	0	2	2	2	2	0	2	2	0	0	0	0	2	0	2	2	0	0	2	2	0
BM337	58801972	59227944	425972	2	2	2	2	2	2	2	2	2	2	2	2	2	0	2	0	-1	2	2	2	0	2	2	2	2	0	2	2	2	2	0	2	2	0	0	0	0	2	0	2	2	0	0	2	2	0
BM338	59227945	59288522	60577	2	2	2	2	2	2	2	2	2	2	2	2	2	0	2	0	-1	2	2	2	0	2	2	2	2	0	2	2	2	2	0	2	2	0	0	0	0	2	0	2	2	0	0	2	2	0
BM339	59288523	59310408	21885	2	2	2	2	2	2	2	2	2	2	2	2	2	0	2	0	-1	2	2	2	0	2	2	2	2	0	2	2	2	2	0	2	2	0	0	0	2	2	0	2	2	0	0	2	2	0
BM340	59310409	59446328	135919	2	2	2	2	2	2	2	2	2	2	2	2	2	0	2	0	-1	2	2	2	0	2	2	2	2	0	2	2	2	2	0	2	2	0	0	0	2	2	0	2	2	0	0	2	2	0
BM341	59446329	59529570	83241	2	2	2	2	2	2	2	2	2	2	2	2	2	0	2	0	-1	2	2	2	0	2	2	2	2	0	2	2	2	2	0	2	2	0	0	0	2	2	0	2	2	0	0	2	2	0
BM343	59529571	59610797	81226	2	2	2	2	2	2	2	2	2	2	2	2	2	0	2	0	-1	2	2	2	0	2	2	2	2	0	2	2	2	2	0	2	2	0	0	0	2	2	0	2	2	0	0	2	2	0
BM342	59610798	59936669	325871	2	2	2	2	2	2	2	2	2	2	2	2	2	0	2	0	-1	2	2	2	0	2	2	2	2	0	2	2	2	2	0	2	2	0	0	0	2	2	0	2	2	0	0	2	2	0
BM344	59936670	59977649	40979	2	2	2	2	2	2	2	2	2	2	2	2	2	0	2	0	-1	2	2	2	0	2	2	2	2	0	2	2	2	2	0	2	2	0	0	0	2	2	0	2	2	0	0	2	2	0
BM345	59977650	60721283	743633	2	2	2	2	2	2	2	2	2	2	2	2	2	0	2	0	-1	2	2	2	0	2	2	2	2	0	2	2	2	2	0	2	2	0	0	0	2	2	0	2	2	0	0	2	2	0
BM346	60721284	60762046	40762	2	2	2	2	2	2	2	2	2	2	2	2	2	0	2	0	-1	2	2	2	0	2	2	2	2	0	2	2	2	2	0	2	2	0	0	0	2	2	0	2	2	0	0	2	2	0
BM347	60762047	60955750	193703	2	2	2	2	2	2	2	2	2	2	2	2	2	0	2	0	-1	2	2	2	0	2	2	2	2	0	2	2	2	2	0	2	2	0	0	0	2	2	0	2	2	0	0	2	2	0
BM348	60955751	61079633	123882	2	2	2	2	2	2	2	2	2	2	2	2	2	0	2	0	-1	2	2	2	0	2	2	2	2	0	2	2	2	2	0	2	2	0	0	0	2	2	0	2	2	0	0	2	2	0
BM349	61079634	61160524	80890	2	2	2	2	2	2	2	2	2	2	2	2	2	0	2	0	-1	2	2	2	0	2	2	2	2	0	2	2	2	2	0	2	2	0	0	0	2	2	0	2	2	0	0	2	2	0
BM350	61160525	61536953	376428	2	2	2	2	2	2	2	2	2	2	2	2	2	0	2	0	-1	2	2	2	0	2	2	2	2	0	2	2	2	2	0	2	2	0	0	0	2	2	0	2	2	0	0	2	2	0
BM351	61536954	61624245	87291	2	2	2	2	2	2	2	2	2	2	2	2	2	0	2	0	-1	2	2	2	0	2	2	2	2	0	2	2	2	2	0	2	2	0	0	0	2	2	0	2	2	0	0	2	2	0
BM352	61624246	61696128	71882	2	2	2	2	2	2	2	2	2	2	2	2	2	0	2	0	-1	2	2	2	0	2	2	2	2	0	2	2	2	2	0	2	2	0	0	0	2	2	0	2	2	0	0	0	2	0
BM353	61696129	62022258	326129	2	2	2	2	2	2	2	2	2	2	2	2	2	0	2	0	-1	2	2	2	0	2	2	2	2	0	2	2	2	2	0	2	2	0	0	0	2	2	0	2	2	0	0	0	2	0
BM354	62022259	62126493	104234	2	2	2	2	2	2	2	2	2	2	2	2	2	0	2	0	-1	2	2	2	0	2	2	2	2	0	2	2	2	2	0	2	2	0	0	0	2	2	0	2	2	0	0	0	2	0
BM355	62126494	62161715	35221	2	2	2	2	2	2	2	2	2	2	2	2	2	0	2	0	-1	2	2	2	0	2	2	2	2	0	2	2	2	2	0	2	2	0	0	0	2	2	0	2	2	0	0	0	2	0
BM356	62161716	62189559	27843	2	2	2	2	2	2	2	2	2	2	2	2	2	0	2	0	-1	2	2	2	0	2	2	2	2	0	2	2	2	2	0	2	2	0	0	0	2	2	0	2	2	0	0	0	2	0
BM358	62189560	62457036	267476	2	2	2	2	2	2	2	2	2	2	2	2	2	0	2	0	-1	2	2	2	0	2	2	2	2	0	2	2	2	2	0	2	2	0	0	0	2	2	0	2	2	0	0	0	2	0
BM357	62457037	62547494	90457	2	2	2	2	2	2	2	2	2	2	2	2	2	0	2	0	-1	2	2	2	0	2	2	2	2	0	2	2	2	2	0	2	2	0	0	0	2	2	0	2	2	0	0	0	2	0
BM359	62547495	62553515	6020	2	2	2	2	2	2	2	2	2	2	2	2	2	0	2	0	-1	2	2	2	0	2	2	0	2	0	2	2	2	2	0	2	2	0	0	0	2	2	0	2	2	0	0	0	2	0
BM360	62553516	62725687	172171	2	2	2	2	2	2	2	2	2	2	2	2	2	0	2	0	-1	2	2	2	0	2	2	0	2	2	2	2	2	2	0	2	2	0	0	0	2	2	0	2	2	0	0	0	2	0
BM361	62725688	62840551	114863	2	2	2	2	2	2	2	2	2	2	2	2	2	0	2	0	-1	2	2	2	0	2	2	0	2	2	2	2	2	2	0	2	2	0	0	0	2	2	0	2	2	0	0	0	2	0
BM362	62840552	63333649	493097	2	2	2	2	2	2	2	2	2	2	2	2	2	0	2	0	-1	2	2	2	0	2	2	0	2	2	2	2	2	2	0	2	2	0	0	0	2	2	0	2	2	0	0	0	2	0
BM364	63333650	63482572	148922	2	2	2	2	2	2	2	2	2	2	2	2	2	0	2	0	-1	2	2	2	0	2	2	0	2	2	2	2	2	2	0	2	2	0	0	0	2	2	0	2	2	0	0	0	2	0
BM363	63482573	63523713	41140	2	2	2	2	2	2	2	2	2	2	2	2	2	0	2	0	-1	2	2	2	0	2	2	0	2	2	2	2	2	2	0	2	2	0	0	0	2	2	0	2	2	0	0	0	2	0
BM365	63523714	63532391	8677	2	2	2	2	2	2	2	2	2	2	2	2	2	0	2	0	-1	2	2	2	0	2	2	0	2	2	2	2	2	2	0	2	2	0	2	0	2	2	0	2	2	0	0	0	2	0
BM366	63532392	63802595	270203	2	2	2	2	2	2	2	2	2	2	2	2	2	0	2	0	-1	2	2	2	0	2	2	0	2	2	2	2	2	2	0	2	2	0	2	0	2	2	0	2	2	0	0	0	2	0
BM367	63802596	63808294	5698	2	2	2	2	2	2	2	2	2	0	2	2	2	0	2	0	-1	2	2	2	0	2	2	0	2	2	2	2	2	2	0	2	2	0	2	0	2	2	0	2	2	0	0	0	2	0
BM368	63808295	63823822	15527	2	2	0	2	2	2	2	2	2	0	2	2	2	0	2	0	-1	2	2	2	0	2	2	0	2	2	2	2	2	2	0	2	2	0	2	0	2	2	0	2	2	0	0	0	2	0
BM369	63823823	63943500	119677	2	2	0	2	2	2	2	2	2	0	2	2	2	0	2	0	-1	2	2	2	0	2	2	0	2	2	2	2	2	2	0	2	2	0	2	0	2	2	0	2	2	0	0	0	2	0
BM370	63943501	64709400	765899	2	2	0	2	2	2	2	2	2	0	2	2	2	0	2	0	-1	2	2	2	0	2	2	0	2	2	2	2	2	2	0	2	2	0	2	0	2	2	0	2	2	0	0	0	2	0
BM372	64709401	65014068	304667	2	2	0	2	2	2	2	2	2	0	2	2	2	0	2	0	-1	2	2	2	0	2	2	0	2	2	2	2	2	2	0	2	2	0	2	0	2	2	0	2	2	0	0	0	2	0
BM374	65014069	65822604	808535	2	2	0	2	2	2	2	2	2	0	2	2	2	0	2	0	-1	2	2	2	0	2	2	0	2	2	2	2	2	2	0	2	2	0	2	0	2	2	0	2	2	0	0	0	2	0
BM371	65822605	66061524	238919	2	2	0	2	2	2	2	2	2	0	2	2	2	0	2	0	-1	2	2	2	0	2	2	0	2	2	2	2	2	2	0	2	2	0	2	0	2	2	0	2	2	0	0	0	2	0
BM373	66061525	66123178	61653	2	2	0	2	2	2	2	2	2	0	2	2	2	0	2	0	-1	2	2	2	0	2	2	0	2	2	2	2	2	2	0	2	2	0	2	0	2	2	0	2	2	0	0	0	2	0
BM375	66123179	66200640	77461	2	2	0	2	2	2	2	2	2	0	2	2	2	0	2	0	-1	2	2	2	0	2	2	0	2	2	2	2	2	2	0	2	2	0	2	0	2	2	0	2	2	0	0	0	2	0
BM377	66200641	66358740	158099	2	2	0	2	2	2	2	2	2	0	2	2	2	0	2	0	-1	2	2	2	0	2	2	0	2	2	2	2	2	2	0	2	2	0	2	0	2	2	0	2	2	0	0	0	2	0
BM379	66358741	66587318	228577	2	2	0	2	2	2	2	2	2	0	2	2	2	0	2	0	-1	2	2	2	0	2	2	0	2	2	2	2	2	2	0	2	2	0	2	0	2	2	0	2	2	0	0	0	2	0
BM376	66587319	66768635	181316	2	2	0	2	2	2	2	2	2	0	2	2	2	0	2	0	-1	2	2	2	0	2	2	0	2	2	2	2	2	2	0	2	2	0	2	0	2	2	0	2	2	0	0	0	2	0
BM378	66768636	66927746	159110	2	2	0	2	2	2	2	2	2	0	2	2	2	0	2	0	-1	2	2	2	0	2	2	0	2	2	2	2	2	2	0	2	2	0	2	0	2	2	0	2	2	0	0	0	2	0
BM380	66927747	67376286	448539	2	2	0	2	2	2	2	2	2	0	2	2	2	0	2	0	-1	2	2	2	0	2	2	0	2	2	2	2	2	2	0	2	2	2	2	0	2	2	0	2	2	0	0	0	2	0
BM381	67376287	67700510	324223	2	2	0	2	2	2	2	2	2	0	2	2	2	0	2	0	-1	2	2	2	0	2	2	0	2	2	2	2	2	2	0	2	2	2	2	0	2	2	0	2	2	0	0	0	2	0
BM382	67700511	67716085	15574	2	2	0	2	2	2	2	2	2	0	2	2	2	0	2	0	-1	2	2	2	0	2	2	0	2	2	2	2	2	2	0	2	2	2	2	0	2	2	0	2	2	0	0	0	2	0
BM383	67716086	67743477	27391	2	2	0	2	2	2	2	2	2	0	2	2	2	0	2	0	-1	2	2	2	0	2	2	0	2	2	2	2	2	2	0	2	2	2	2	0	2	2	0	2	2	0	0	0	2	0
BM384	67743478	67883764	140286	2	2	0	2	2	2	2	2	2	0	2	2	2	0	2	0	-1	2	2	2	0	2	2	0	2	2	2	2	2	2	0	2	2	2	2	0	2	2	0	2	2	0	0	0	2	0
BM388	67883765	68012528	128763	2	2	0	2	2	2	2	2	2	0	2	2	2	0	2	0	-1	2	2	2	0	2	2	0	2	2	-1	2	2	2	0	2	2	2	2	0	2	2	0	2	2	0	0	0	2	0
BM385	68012529	68176338	163809	2	2	0	2	2	2	2	2	2	0	2	2	2	0	2	0	-1	2	2	2	0	2	2	0	2	2	-1	2	2	2	0	2	2	2	2	0	2	2	0	2	2	0	0	0	2	0
BM386	68176339	68279995	103656	2	2	0	2	2	2	2	2	2	0	2	2	2	0	2	0	-1	2	2	2	0	2	2	0	2	2	-1	2	2	2	0	2	2	2	2	0	2	2	0	2	2	0	0	0	2	0
BM387	68279996	68355107	75111	2	2	0	2	2	2	2	2	2	0	2	2	2	0	2	0	-1	2	2	2	0	2	2	0	2	2	-1	2	2	2	0	2	2	2	2	0	2	2	0	2	2	0	0	0	2	0
BM389	68355108	68539757	184649	2	2	0	2	2	2	2	2	2	0	2	2	2	0	2	0	-1	2	2	2	0	2	2	0	2	2	-1	2	2	2	0	2	2	2	2	0	2	2	0	2	2	0	0	0	2	0
BM393	68539758	68556442	16684	2	2	0	2	2	2	2	2	2	0	2	2	2	0	2	0	-1	2	2	2	0	2	2	0	2	2	-1	2	2	2	0	2	2	2	2	0	2	2	0	2	2	0	0	0	2	0
BM390	68556443	68628846	72403	2	2	0	2	2	2	2	2	2	0	2	2	2	0	2	0	-1	2	2	2	0	2	2	0	2	2	-1	2	2	2	0	2	2	2	2	0	2	2	0	2	2	0	0	0	2	0
BM391	68628847	68691058	62211	2	2	0	2	2	2	2	2	2	0	2	2	2	0	2	0	-1	2	2	2	0	2	2	0	2	2	-1	2	2	2	0	2	2	2	2	0	2	2	0	2	2	0	0	0	2	0
BM392	68691059	68857534	166475	2	2	0	2	2	2	2	2	2	0	2	2	2	0	2	0	-1	2	2	2	0	2	2	0	2	2	-1	2	2	2	0	2	2	2	2	0	2	2	0	2	2	0	0	0	2	0
BM394	68857535	68888209	30674	2	2	2	2	2	2	2	2	2	2	2	2	2	0	2	0	-1	2	2	2	0	2	2	0	2	2	-1	2	2	2	0	2	2	2	2	0	2	2	0	2	2	0	0	0	2	0
BM395	68888210	68967579	79369	2	2	2	2	2	2	2	2	2	2	2	2	2	0	2	0	-1	2	2	2	0	2	2	0	2	2	-1	2	2	2	0	2	2	2	2	0	2	2	0	2	2	0	0	0	2	0
BM396	68967580	68973254	5674	2	2	2	2	2	2	2	2	2	2	2	2	2	0	2	0	-1	2	2	2	0	2	2	0	2	2	2	2	2	2	0	2	2	2	2	0	2	2	0	2	2	0	0	0	2	0
BM397	68973255	69140974	167719	2	2	2	2	2	2	2	2	2	2	2	2	2	0	2	0	-1	2	2	2	0	2	2	0	2	2	2	2	2	2	0	2	2	2	2	0	2	2	0	2	2	0	0	0	2	0
BM400	69140975	69240716	99741	2	2	2	2	2	2	2	2	2	2	2	2	2	0	2	0	-1	2	2	2	0	2	2	0	2	2	2	2	2	2	0	2	2	2	2	0	2	2	0	2	2	0	0	0	2	0
BM399	69240717	69280202	39485	2	2	2	2	2	2	2	2	2	2	2	2	2	0	2	0	-1	2	2	2	0	2	2	0	2	2	2	2	2	2	0	2	2	2	2	0	2	2	0	2	2	0	0	0	2	0
BM401	69280203	69774218	494015	2	2	2	2	2	2	2	2	2	2	2	2	2	0	2	0	-1	2	2	2	0	2	2	0	2	2	2	2	2	2	0	2	2	2	2	0	2	2	0	2	2	0	0	0	2	0
BM398	69774219	70000306	226087	2	2	2	2	2	2	2	2	2	2	2	2	2	0	2	0	-1	2	2	2	0	2	2	0	2	2	2	2	2	2	0	2	2	2	2	0	2	2	0	2	2	0	0	0	2	0
BM402	70000307	77976284	7975977	2	2	2	2	2	2	2	2	2	2	2	2	2	0	2	0	-1	2	2	2	0	2	2	0	2	2	2	2	2	2	0	2	2	2	2	0	2	2	0	2	2	0	0	0	2	0
BM403	77976285	78753167	776882	2	2	2	2	2	2	2	2	2	2	2	2	2	0	2	0	-1	2	2	2	0	2	2	0	2	2	2	2	2	2	0	2	2	2	2	0	2	2	0	2	2	0	0	0	2	0
BM404	78753168	79189246	436078	2	2	2	2	2	2	2	2	2	2	2	2	2	0	2	2	-1	2	2	2	0	2	2	0	2	2	2	2	2	2	0	2	2	2	2	0	2	2	0	2	2	0	0	0	2	0
BM405	79189247	79648364	459117	2	2	2	2	2	2	2	2	2	2	2	2	2	0	2	2	-1	2	2	2	0	2	2	0	2	2	2	2	2	2	0	2	2	2	2	0	2	2	0	2	2	0	0	0	2	0
BM406	79648365	80131223	482858	2	2	2	2	2	2	2	2	2	2	2	2	2	0	2	2	0	2	2	2	0	2	2	0	2	2	2	2	2	2	0	2	2	2	2	0	2	2	0	2	2	0	0	0	2	0
BM407	80131224	81532474	1401250	2	2	2	2	2	2	2	2	2	2	2	2	2	0	2	2	0	2	2	2	0	2	2	0	2	2	2	2	2	2	0	2	2	2	2	0	2	2	0	2	2	0	0	0	2	0
BM410	81532475	81671736	139261	2	2	2	2	2	2	2	2	2	2	2	2	2	0	2	2	0	2	2	2	0	2	2	0	2	2	2	2	2	2	0	2	2	2	2	0	2	2	0	2	2	0	0	0	2	0
BM408	81671737	81699886	28149	2	2	2	2	2	2	2	2	2	2	2	2	2	0	2	2	0	2	2	2	0	2	2	0	2	2	2	2	2	2	0	2	2	2	2	0	2	2	0	2	2	0	0	0	2	0
BM409	81699887	81932804	232917	2	2	2	2	2	2	2	2	2	2	2	2	2	0	2	2	0	2	2	2	0	2	2	0	2	2	2	2	2	2	0	2	2	2	2	0	2	2	0	2	2	0	0	0	2	0
BM411	81932805	82071854	139049	2	2	2	2	2	2	2	2	2	2	2	2	2	0	2	2	0	2	2	2	0	2	2	0	2	2	2	2	2	2	0	2	2	2	2	0	2	2	0	2	2	0	0	0	2	0
BM412	82071855	82315514	243659	2	2	2	2	2	2	2	2	2	2	2	2	2	0	2	2	0	2	2	2	0	2	2	0	2	2	2	2	2	2	0	2	2	2	2	0	2	2	0	2	2	0	0	0	2	0
BM413	82315515	82365076	49561	2	2	2	2	2	2	2	2	2	2	2	-1	2	0	2	2	0	2	2	2	0	2	2	0	2	2	2	2	2	2	0	2	2	2	2	0	2	2	0	2	2	0	0	0	2	0
BM414	82365077	82415155	50078	2	2	2	2	2	2	2	2	2	2	2	-1	2	0	2	2	0	2	2	2	0	2	2	0	2	2	2	2	2	2	0	2	2	2	2	0	2	2	0	2	2	0	0	0	2	0
BM415	82415156	82476836	61680	2	2	2	2	2	2	2	2	2	2	2	-1	2	0	2	2	0	2	2	2	0	2	2	0	2	2	2	2	2	2	0	2	2	2	2	0	2	2	0	2	2	0	0	0	2	0
BM416	82476837	82489842	13005	2	2	2	2	2	2	2	2	2	2	2	-1	2	0	2	2	0	2	2	2	0	2	2	0	2	2	2	2	2	2	0	2	2	2	2	0	2	2	0	2	2	0	0	0	2	0
BM417	82489843	82591657	101814	2	2	2	2	2	2	2	2	2	2	2	-1	2	0	2	2	0	2	2	2	0	2	2	0	2	2	-1	2	2	2	0	2	2	2	2	0	2	2	0	2	2	0	0	0	2	0
BM419	82591658	83562549	970891	2	2	2	2	2	2	2	2	2	2	2	-1	2	0	2	2	0	2	2	2	0	2	2	0	2	2	-1	2	2	2	0	2	2	2	2	0	2	2	0	2	2	0	0	0	2	0
BM423	83562550	83644590	82040	2	2	2	2	2	2	2	2	2	2	2	-1	2	0	2	2	0	2	2	2	0	2	2	0	2	2	-1	2	2	2	0	2	2	2	2	0	2	2	0	2	2	0	0	0	2	0
BM420	83644591	83760157	115566	2	2	2	2	2	2	2	2	2	2	2	-1	2	0	2	2	0	2	2	2	0	2	2	0	2	2	-1	2	2	2	0	2	2	2	2	0	2	2	0	2	2	0	0	0	2	0
BM421	83760158	83919144	158986	2	2	2	2	2	2	2	2	2	2	2	-1	2	0	2	2	0	2	2	2	0	2	2	0	2	2	-1	2	2	2	0	2	2	2	2	0	2	2	0	2	2	0	0	0	2	0
BM418	83919145	84189588	270443	2	2	2	2	2	2	2	2	2	2	2	-1	2	0	2	2	0	2	2	2	0	2	2	0	2	2	-1	2	2	2	0	2	2	2	2	0	2	2	0	2	2	0	0	0	2	0
BM422	84189589	84314680	125091	2	2	2	2	2	2	2	2	2	2	2	-1	2	0	2	2	0	2	2	2	0	2	2	0	2	2	-1	2	2	2	0	2	2	2	2	0	2	2	0	2	2	0	0	0	2	0
BM424	84314681	84522931	208250	2	2	2	2	2	2	2	2	2	2	2	-1	2	0	2	2	0	2	2	2	0	2	2	0	2	2	-1	2	2	2	0	2	2	2	2	0	2	2	0	2	2	0	0	0	2	0
BM429	84522932	84549505	26573	2	2	2	2	2	2	2	2	2	2	2	-1	2	0	2	2	0	2	2	2	0	2	2	0	2	2	-1	2	2	2	0	2	2	2	2	0	2	2	0	2	2	0	0	0	2	0
BM426	84549506	84628410	78904	2	2	2	2	2	2	2	2	2	2	2	-1	2	0	2	2	0	2	2	2	0	2	2	0	2	2	-1	2	2	2	0	2	2	2	2	0	2	2	0	2	2	0	0	0	2	0
BM425	84628411	84647628	19217	2	2	2	2	2	2	2	2	2	2	2	-1	2	0	2	2	0	2	2	2	0	2	2	0	2	2	-1	2	2	2	0	2	2	2	2	0	2	2	0	2	2	0	0	0	2	0
BM427	84647629	84665313	17684	2	2	2	2	2	2	2	2	2	2	2	-1	2	0	2	2	0	2	2	2	0	2	2	0	2	2	-1	2	2	2	0	2	2	2	2	0	2	2	0	2	2	0	0	0	2	0
BM428	84665314	85031872	366558	2	2	2	2	2	2	2	2	2	2	2	-1	2	0	2	2	0	2	2	2	0	2	2	0	2	2	-1	2	2	2	0	2	2	2	2	0	2	2	0	2	2	0	0	0	2	0
BM430	85031873	85116168	84295	2	2	2	2	2	2	2	2	2	2	2	-1	2	0	2	2	0	2	2	2	0	2	2	0	2	2	-1	2	2	2	0	2	2	2	2	0	2	2	0	2	2	0	0	0	2	0
BM432	85116169	85180396	64227	2	2	2	2	2	2	2	2	2	2	2	-1	2	0	2	2	0	2	2	2	0	2	2	0	2	2	0	2	2	2	0	2	2	2	2	0	2	2	0	2	2	0	0	0	2	0
BM431	85180397	85442803	262406	2	2	2	2	2	2	2	2	2	2	2	-1	2	0	2	2	-1	2	2	2	0	2	2	0	2	2	0	2	2	2	0	2	2	2	2	0	2	2	0	2	2	0	0	0	2	0
BM433	85442804	85502432	59628	2	2	2	2	2	2	2	2	2	2	2	-1	2	0	2	2	0	2	2	2	0	2	2	0	2	2	0	2	2	2	0	2	2	2	2	0	2	2	0	2	2	0	0	0	2	0
BM434	85502433	85595432	92999	2	2	2	2	2	2	2	2	2	2	2	0	2	0	2	2	0	2	2	2	0	2	2	0	2	2	0	2	2	2	0	2	2	2	2	0	2	2	0	2	2	0	0	0	2	0
BM435	85595433	85641989	46556	2	2	2	2	2	2	2	2	2	2	2	0	2	0	2	2	0	2	2	2	0	2	2	0	2	2	0	2	2	2	0	2	2	2	2	0	2	2	0	2	2	0	0	0	2	0
BM436	85641990	85742169	100179	2	2	2	2	2	2	2	2	2	2	2	0	2	0	2	2	0	2	2	2	0	2	2	0	2	2	0	2	2	2	0	2	2	2	2	0	2	2	0	2	2	0	0	0	2	0
BM437	85742170	85891140	148970	2	2	2	2	2	2	2	2	2	2	2	-1	2	0	2	2	0	2	2	2	0	2	2	0	2	2	-1	2	2	2	0	2	2	2	2	0	2	2	0	2	2	0	0	0	2	0
BM438	85891141	85944097	52956	2	2	2	2	2	2	2	2	2	2	2	-1	2	0	2	2	0	2	2	2	0	2	2	0	2	2	-1	2	2	2	0	2	2	2	2	0	2	2	0	2	2	0	0	0	2	0
BM439	85944098	86077833	133735	2	2	2	2	2	2	2	2	2	2	2	-1	2	0	2	2	0	2	2	2	0	2	2	0	2	2	-1	2	2	2	0	2	2	2	2	0	2	2	0	2	2	0	0	0	2	0
BM440	86077834	86205065	127231	2	2	2	2	2	2	2	2	2	2	2	-1	2	0	2	2	-1	2	2	2	0	2	2	0	2	2	-1	2	2	2	0	2	2	2	2	0	2	2	0	2	2	0	0	0	2	0
BM441	86205066	86310099	105033	2	2	2	2	2	2	2	2	2	2	2	-1	2	0	2	2	-1	2	2	2	0	2	2	0	2	2	-1	2	2	2	0	2	2	2	2	0	2	2	0	2	2	0	0	0	2	0
BM442	86310100	86736909	426809	2	2	2	2	2	2	2	2	2	2	2	-1	2	0	2	2	0	2	2	2	0	2	2	0	2	2	-1	2	2	2	0	2	2	2	2	0	2	2	0	2	2	0	0	0	2	0
BM443	86736910	86765620	28710	2	2	2	2	2	2	2	2	2	2	2	0	2	0	2	2	0	2	2	2	0	2	2	0	2	2	-1	2	2	2	0	2	2	2	2	0	2	2	0	2	2	0	0	0	2	0
BM447	86765621	86829937	64316	2	2	2	2	2	2	2	2	2	2	2	0	2	0	2	2	0	2	2	2	0	2	2	0	2	2	-1	2	2	2	0	2	2	2	2	0	2	2	0	2	2	0	0	0	2	0
BM444	86829938	86885046	55108	2	2	2	2	2	2	2	2	2	2	2	0	2	0	2	2	0	2	2	2	0	2	2	0	2	2	-1	2	2	2	0	2	2	2	2	0	2	2	0	2	2	0	0	0	2	0
BM448	86885047	87034475	149428	2	2	2	2	2	2	2	2	2	2	2	0	2	0	2	2	0	2	2	2	0	2	2	0	2	2	-1	2	2	2	0	2	2	2	2	0	2	2	0	2	2	0	0	0	2	0
BM445	87034476	87387813	353337	2	2	2	2	2	2	2	2	2	2	2	0	2	0	2	2	0	2	2	2	0	2	2	0	2	2	-1	2	2	2	0	2	2	2	2	0	2	2	0	2	2	0	0	0	2	0
BM446	87387814	87482673	94859	2	2	2	2	2	2	2	2	2	2	2	0	2	0	2	2	0	2	2	2	0	2	2	0	2	2	-1	2	2	2	0	2	2	2	2	0	2	2	0	2	2	0	0	0	2	0
BM450	87482674	87653037	170363	2	2	2	2	2	2	2	2	2	2	2	0	2	0	2	2	0	2	2	2	0	2	2	0	2	2	-1	2	2	2	0	2	2	2	2	0	2	2	0	2	2	0	0	0	2	0
BM449	87653038	87762863	109825	2	2	2	2	2	2	2	2	2	2	2	0	2	0	2	2	0	2	2	2	0	2	2	0	2	2	-1	2	2	2	0	2	2	2	2	0	2	2	0	2	2	0	0	0	2	0
BM451	87762864	87797752	34888	2	2	2	2	2	2	2	2	2	2	2	0	2	0	2	2	0	2	2	2	0	2	2	0	2	2	-1	2	2	2	0	2	2	2	2	0	2	2	0	2	2	0	0	0	2	0
BM455	87797753	88138130	340377	2	2	2	2	2	2	2	2	2	2	2	0	2	0	2	2	0	2	2	2	0	2	2	0	2	2	2	2	2	2	0	2	2	2	2	0	2	2	0	2	2	0	0	0	2	0
BM456	88138131	88300490	162359	2	2	2	2	2	2	2	2	2	2	2	0	2	0	2	2	0	2	2	2	0	2	2	0	2	2	2	2	2	2	0	2	2	2	2	0	2	2	0	2	2	0	0	0	2	0
BM457	88300491	88333718	33227	2	2	2	2	2	2	2	2	2	2	2	0	2	0	2	2	0	2	2	2	0	2	2	0	2	2	2	2	2	2	0	2	2	2	2	0	2	2	0	2	2	0	0	0	2	0
BM459	88333719	88440624	106905	2	2	2	2	2	2	2	2	2	2	2	0	2	0	2	2	0	2	2	2	0	2	2	0	2	2	-1	2	2	2	0	2	2	2	2	0	2	2	0	2	2	0	0	0	2	0
BM452	88440625	88585416	144791	2	2	2	2	2	2	2	2	2	2	2	0	2	0	2	2	0	2	2	2	0	2	2	0	2	2	-1	2	2	2	0	2	2	2	2	0	2	2	0	2	2	0	0	0	2	0
BM454	88585417	88605144	19727	2	2	2	2	2	2	2	2	2	2	2	0	2	0	2	2	0	2	2	2	0	2	2	0	2	2	-1	2	2	2	0	2	2	2	2	0	2	2	0	2	2	0	0	0	2	0
BM458	88605145	88845989	240844	2	2	2	2	2	2	2	2	2	2	2	0	2	0	2	2	0	2	2	2	0	2	2	0	2	2	2	2	2	2	0	2	2	2	2	0	2	2	0	2	2	0	0	0	2	0
BM453	88845990	89279783	433793	2	2	2	2	2	2	2	2	2	2	2	0	2	0	2	2	0	2	2	2	0	2	2	0	2	2	-1	2	2	2	0	2	2	2	2	0	2	2	0	2	2	0	0	0	2	0
BM460	89279784	89407397	127613	2	2	2	2	2	2	2	2	2	2	2	0	2	0	2	2	0	2	2	2	0	2	2	0	2	2	-1	2	2	2	0	2	2	2	2	0	2	2	0	2	2	0	0	0	2	0
BM462	89407398	89472065	64667	2	2	2	2	2	2	2	2	2	2	2	0	2	0	2	2	0	2	2	2	0	2	2	0	2	2	-1	2	2	2	0	2	2	2	2	0	2	2	0	2	2	0	0	0	2	0
BM466	89472066	89708048	235982	2	2	2	2	2	2	2	2	2	2	2	0	2	0	2	2	0	2	2	2	0	2	2	0	2	2	-1	2	2	2	0	2	2	2	2	0	2	2	0	2	2	0	0	0	2	0
BM461	89708049	89757649	49600	2	2	2	2	2	2	2	2	2	2	2	0	2	0	2	2	0	2	2	2	0	2	2	0	2	2	-1	2	2	2	0	2	2	2	2	0	2	2	0	2	2	0	0	0	2	0
BM465	89757650	89821426	63776	2	2	2	2	2	2	2	2	2	2	2	0	2	0	2	2	0	2	2	2	0	2	2	0	2	2	-1	2	2	2	0	2	2	2	2	0	2	2	0	2	2	0	0	0	2	0
BM464	89821427	89880007	58580	2	2	2	2	2	2	2	2	2	2	2	0	2	0	2	2	0	2	2	2	0	2	2	0	2	2	-1	2	2	2	0	2	2	2	2	0	2	2	0	2	2	0	0	0	2	0
BM468	89880008	89904860	24852	2	2	2	2	2	2	2	2	2	2	2	0	2	0	2	2	0	2	2	2	0	2	2	0	2	2	-1	2	2	2	0	2	2	2	2	0	2	2	0	2	2	0	0	0	2	0
BM463	89904861	89995936	91075	2	2	2	2	2	2	2	2	2	2	2	0	2	0	2	2	0	2	2	2	0	2	2	0	2	2	-1	2	2	2	0	2	2	2	2	0	2	2	0	2	2	0	0	0	2	0
BM467	89995937	90078669	82732	2	2	2	2	2	2	2	2	2	2	2	0	2	0	2	2	0	2	2	2	0	2	2	0	2	2	-1	2	2	2	0	2	2	2	2	0	2	2	0	2	2	0	0	0	2	0
BM469	90078670	90788256	709586	2	2	2	2	2	2	2	2	2	2	2	0	2	0	2	2	0	2	2	2	0	2	2	0	2	2	-1	2	2	2	0	2	2	2	2	0	2	2	0	2	2	0	0	0	2	0
BM471	90788257	90865460	77203	2	2	2	2	2	2	2	2	2	2	2	0	2	0	2	2	0	2	2	2	0	2	2	0	2	2	-1	2	2	2	0	2	2	2	2	0	2	2	0	2	2	0	0	0	2	0
BM470	90865461	90949253	83792	2	2	2	2	2	2	2	2	2	2	2	0	2	0	2	2	0	2	2	2	0	2	2	0	2	2	-1	2	2	2	0	2	2	2	2	0	2	2	0	2	2	0	0	0	2	0
BM474	90949254	90966829	17575	2	2	2	2	2	2	2	2	2	2	2	0	2	0	2	2	0	2	2	2	0	2	2	0	2	2	-1	2	2	2	0	2	2	2	2	0	2	2	0	2	2	0	0	0	2	0
BM473	90966830	91016714	49884	2	2	2	2	2	2	2	2	2	2	2	0	2	0	2	2	0	2	2	2	0	2	2	0	2	2	2	2	2	2	0	2	2	2	2	0	2	2	0	2	2	0	0	0	2	0
BM475	91016715	91149468	132753	2	2	2	2	2	2	2	2	2	2	2	0	2	0	2	2	0	2	2	2	0	2	2	0	2	2	2	2	2	2	0	2	2	2	2	0	2	2	0	2	2	0	0	0	2	0
BM472	91149469	91269621	120152	2	2	2	2	2	2	2	2	2	2	2	0	2	0	2	2	0	2	2	2	0	2	2	0	2	2	2	2	2	2	0	2	2	2	2	0	2	2	0	2	2	0	0	0	2	0
BM476	91269622	91344338	74716	2	2	2	2	2	2	2	2	2	2	2	0	2	0	2	2	0	2	2	2	0	2	2	0	2	2	-1	2	2	2	0	2	2	2	2	0	2	2	0	2	2	0	0	0	2	0
BM477	91344339	91571514	227175	2	2	2	2	2	2	2	2	2	2	2	0	2	0	2	2	0	2	2	2	0	2	2	0	2	2	-1	2	2	2	0	2	2	2	2	0	2	2	0	2	2	0	0	0	2	0
BM480	91571515	91607778	36263	2	2	2	2	2	2	2	2	2	2	2	0	2	0	2	2	0	2	2	2	0	2	2	0	2	2	-1	2	2	2	0	2	2	2	2	0	2	2	0	2	2	0	0	0	2	0
BM479	91607779	91659724	51945	2	2	2	2	2	2	2	2	2	2	2	0	2	0	2	2	0	2	2	2	0	2	2	0	2	2	2	2	2	2	0	2	2	2	2	0	2	2	0	2	2	0	0	0	2	0
BM481	91659725	91760394	100669	2	2	2	2	2	2	2	2	2	2	2	0	2	0	2	2	0	2	2	2	0	2	2	0	2	2	2	2	2	2	0	2	2	2	2	0	2	2	0	2	2	0	0	0	2	0
BM485	91760395	91843462	83067	2	2	2	2	2	2	2	2	2	2	2	0	2	0	2	2	0	2	2	2	0	2	2	0	2	2	2	2	2	2	0	2	2	2	2	0	2	2	0	2	2	0	0	0	2	0
BM478	91843463	91955540	112077	2	2	2	2	2	2	2	2	2	2	2	0	2	0	2	2	0	2	2	2	0	2	2	0	2	2	-1	2	2	2	0	2	2	2	2	0	2	2	0	2	2	0	0	0	2	0
BM482	91955541	92044255	88714	2	2	2	2	2	2	2	2	2	2	2	0	2	0	2	2	0	2	2	2	0	2	2	0	2	2	-1	2	2	2	0	2	2	2	2	0	2	2	0	2	2	0	0	0	2	0
BM483	92044256	92220885	176629	2	2	2	2	2	2	2	2	2	2	2	0	2	0	2	2	0	2	2	2	0	2	2	0	2	2	-1	2	2	2	0	2	2	2	2	0	2	2	0	2	2	0	0	0	2	0
BM484	92220886	92288218	67332	2	2	2	2	2	2	2	2	2	2	2	0	2	0	2	2	0	2	2	2	0	2	2	0	2	2	2	2	2	2	0	2	2	2	2	0	2	2	0	2	2	0	0	0	2	0
BM486	92288219	92487798	199579	2	2	2	2	2	2	2	2	2	2	2	0	2	0	2	2	0	2	2	2	0	2	2	0	2	2	-1	2	2	2	0	2	2	2	2	0	2	2	0	2	2	0	0	0	2	0
BM489	92487799	92553883	66084	2	2	2	2	2	2	2	2	2	2	2	0	2	0	2	2	0	2	2	2	0	2	2	0	2	2	-1	2	2	2	0	2	2	2	2	0	2	2	0	2	2	0	0	0	2	0
BM490	92553884	92722225	168341	2	2	2	2	2	2	2	2	2	2	2	0	2	0	2	2	0	2	2	2	0	2	2	0	2	2	2	2	2	2	0	2	2	2	2	0	2	2	0	2	2	0	0	0	2	0
BM488	92722226	93002423	280197	2	2	2	2	2	2	2	2	2	2	2	0	2	0	2	2	0	2	2	2	0	2	2	0	2	2	2	2	2	2	0	2	2	2	2	0	2	2	0	2	2	0	0	0	2	0
BM487	93002424	93062860	60436	2	2	2	2	2	2	2	2	2	2	2	0	2	0	2	2	0	2	2	2	0	2	2	0	2	2	2	2	2	2	0	2	2	2	2	0	2	2	0	2	2	0	0	0	2	0
BM493	93062861	93192293	129432	2	2	2	2	2	2	2	2	2	2	2	0	2	0	2	2	0	2	2	2	0	2	2	0	2	2	0	2	2	2	0	2	2	2	2	0	2	2	0	2	2	0	0	0	2	0
BM492	93192294	93225565	33271	2	2	2	2	2	2	2	2	2	2	2	0	2	0	2	2	0	2	2	2	0	2	2	0	2	2	0	2	2	2	0	2	2	2	2	0	2	2	0	2	2	0	0	0	2	0
BM491	93225566	93235145	9579	2	2	2	2	2	2	2	2	2	2	2	0	2	0	2	2	0	2	2	2	0	2	2	0	2	2	0	2	2	2	0	2	2	2	2	0	2	2	0	2	2	0	0	0	2	0
BM494	93235146	93370110	134964	2	2	2	2	2	2	2	2	2	2	2	0	2	0	2	2	0	2	2	2	0	2	2	0	2	2	0	2	2	2	0	2	2	2	2	0	2	2	0	2	2	0	0	0	2	0
BM495	93370111	93418180	48069	2	2	2	2	2	2	2	2	2	2	2	0	2	0	2	2	0	2	2	2	0	2	2	0	2	2	2	2	2	2	0	2	2	2	2	0	2	2	0	2	2	0	0	0	2	0
BM496	93418181	94435092	1016911	2	2	2	2	2	2	2	2	2	2	2	0	2	0	2	2	0	2	2	2	0	2	2	0	2	2	2	2	2	2	0	2	2	2	2	0	2	2	0	2	2	0	0	0	2	0
BM497	94435093	94917628	482535	2	2	2	2	2	2	2	2	2	2	2	0	2	0	2	2	0	2	2	2	0	2	2	0	2	2	2	2	2	2	0	2	2	2	2	0	2	2	0	2	2	0	0	0	2	0
BM499	94917629	95268408	350779	2	2	2	2	2	2	2	2	2	2	2	0	2	0	2	2	0	2	2	2	0	2	2	0	2	2	-1	2	2	2	0	2	2	2	2	0	2	2	0	2	2	0	0	0	2	0
BM498	95268409	95388531	120122	2	2	2	2	2	2	2	2	2	2	2	0	2	0	2	2	0	2	2	2	0	2	2	0	2	2	2	2	2	2	0	2	2	2	2	0	2	2	0	2	2	0	0	0	2	0
BM502	95388532	95523043	134511	2	2	2	2	2	2	2	2	2	2	2	0	2	0	2	2	0	2	2	2	0	2	2	0	2	2	-1	2	2	2	0	2	2	2	2	0	2	2	0	2	2	0	0	0	2	0
BM501	95523044	95638518	115474	2	2	2	2	2	2	2	2	2	2	2	0	2	0	2	2	0	2	2	2	0	2	2	0	2	2	-1	2	2	2	0	2	2	2	2	0	2	2	0	2	2	0	0	0	2	0
BM500	95638519	95711285	72766	2	2	2	2	2	2	2	2	2	2	2	0	2	0	2	2	0	2	2	2	0	2	2	0	2	2	-1	2	2	2	0	2	2	2	2	0	2	2	0	2	2	0	0	0	2	0
BM503	95711286	95790900	79614	2	2	2	2	2	2	2	2	2	2	2	0	2	0	2	2	0	2	2	2	0	2	2	0	2	2	-1	2	2	2	0	2	2	2	2	0	2	2	0	2	2	0	0	0	2	0
BM504	95790901	95866809	75908	2	2	2	2	2	2	2	2	2	2	2	0	2	0	2	2	0	2	2	2	0	2	2	0	2	2	-1	2	2	2	0	2	2	2	2	0	2	2	0	2	2	0	0	0	2	0
BM505	95866810	95924883	58073	2	2	2	2	2	2	2	2	2	2	2	0	2	0	2	2	0	2	2	2	0	2	2	0	2	2	-1	2	2	2	0	2	2	2	2	0	2	2	0	2	2	0	0	0	2	0
BM506	95924884	95964508	39624	2	2	2	2	2	2	2	2	2	2	2	0	2	0	2	2	0	2	2	2	0	2	2	0	2	2	2	2	2	2	0	2	2	2	2	0	2	2	0	2	2	0	0	0	2	0
BM507	95964509	96109004	144495	2	2	2	2	2	2	2	2	2	2	2	0	2	0	2	2	0	2	2	2	0	2	2	0	2	2	2	2	2	2	0	2	2	2	2	0	2	2	0	2	2	0	0	0	2	0
BM508	96109005	96193755	84750	2	2	2	2	2	2	2	2	2	2	2	-1	2	0	2	2	0	2	2	2	0	2	2	0	2	2	2	2	2	2	0	2	2	2	2	0	2	2	0	2	2	0	0	0	2	0
BM509	96193756	96213870	20114	2	2	2	2	2	2	2	2	2	2	2	-1	2	0	2	2	0	2	2	2	0	2	2	0	2	2	2	2	2	2	0	2	2	2	2	0	2	2	0	2	2	0	0	0	2	0
BM510	96213871	96265331	51460	2	2	2	2	2	2	2	2	2	2	2	-1	2	0	2	2	0	2	2	2	0	2	2	0	2	2	2	2	2	2	0	2	2	2	2	0	2	2	0	2	2	0	0	0	2	0
BM515	96265332	96343900	78568	2	2	2	2	2	2	2	2	2	2	2	0	2	0	2	2	0	2	2	2	0	2	2	0	2	2	0	2	2	2	0	2	2	2	2	0	2	2	0	2	2	0	0	0	2	0
BM514	96343901	96361911	18010	2	2	2	2	2	2	2	2	2	2	2	0	2	0	2	2	0	2	2	2	0	2	2	0	2	2	-1	2	2	2	0	2	2	2	2	0	2	2	0	2	2	0	0	0	2	0
BM513	96361912	96379280	17368	2	2	2	2	2	2	2	2	2	2	2	0	2	0	2	2	0	2	2	2	0	2	2	0	2	2	-1	2	2	2	0	2	2	2	2	0	2	2	0	2	2	0	0	0	2	0
BM517	96379281	96473828	94547	2	2	2	2	2	2	2	2	2	2	2	-1	2	0	2	2	0	2	2	2	0	2	2	0	2	2	-1	2	2	2	0	2	2	2	2	0	2	2	0	2	2	0	0	0	2	0
BM512	96473829	96481048	7219	2	2	2	2	2	2	2	2	2	2	2	-1	2	0	2	2	0	2	2	2	0	2	2	0	2	2	-1	2	2	2	0	2	2	2	2	0	2	2	0	2	2	0	0	0	2	0
BM516	96481049	96543820	62771	2	2	2	2	2	2	2	2	2	2	2	0	2	0	2	2	0	2	2	2	0	2	2	0	2	2	-1	2	2	2	0	2	2	2	2	0	2	2	0	2	2	0	0	0	2	0
BM511	96543821	96610947	67126	2	2	2	2	2	2	2	2	2	2	2	0	2	0	2	2	0	2	2	2	0	2	2	0	2	2	-1	2	2	2	0	2	2	2	2	0	2	2	0	2	2	0	0	0	2	0
BM522	96610948	96753567	142619	2	2	2	2	2	2	2	2	2	2	2	0	2	0	2	2	0	2	2	2	0	2	2	0	2	2	-1	2	2	2	0	2	2	2	2	0	2	2	0	2	2	0	0	0	2	0
BM521	96753568	96763380	9812	2	2	2	2	2	2	2	2	2	2	2	0	2	0	2	2	0	2	2	2	0	2	2	0	2	2	-1	2	2	2	0	2	2	2	2	0	2	2	0	2	2	0	0	0	2	0
BM520	96763381	96779783	16402	2	2	2	2	2	2	2	2	2	2	2	0	2	0	2	2	0	2	2	2	0	2	2	0	2	2	2	2	2	2	0	2	2	2	2	0	2	2	0	2	2	0	0	0	2	0
BM518	96779784	97033318	253534	2	2	2	2	2	2	2	2	2	2	2	0	2	0	2	2	0	2	2	2	0	2	2	0	2	2	2	2	2	2	0	2	2	2	2	0	2	2	0	2	2	0	0	0	2	0
BM519	97033319	97140947	107628	2	2	2	2	2	2	2	2	2	2	2	0	2	0	2	2	0	2	2	2	0	2	2	0	2	2	-1	2	2	2	0	2	2	2	2	0	2	2	0	2	2	0	0	0	2	0
BM523	97140948	97269544	128596	2	2	2	2	2	2	2	2	2	2	2	0	2	0	2	2	0	2	2	2	0	2	2	0	2	2	-1	2	2	2	0	2	2	2	2	0	2	2	0	2	2	0	0	0	2	0
BM527	97269545	97288418	18873	2	2	2	2	2	2	2	2	2	2	2	0	2	0	2	2	0	2	2	2	0	2	2	0	2	2	2	2	2	2	0	2	2	2	2	0	2	2	0	2	2	0	0	0	2	0
BM528	97288419	97444449	156030	2	2	2	2	2	2	2	2	2	2	2	0	2	0	2	2	0	2	2	2	0	2	2	0	2	2	2	2	2	2	0	2	2	2	2	0	2	2	0	2	2	0	0	0	2	0
BM530	97444450	97480273	35823	2	2	2	2	2	2	2	2	2	2	2	0	2	0	2	2	0	2	2	2	0	2	2	0	2	2	-1	2	2	2	0	2	2	2	2	0	2	2	0	2	2	0	0	0	2	0
BM524	97480274	97491329	11055	2	2	2	2	2	2	2	2	2	2	2	0	2	0	2	2	0	2	2	2	0	2	2	0	2	2	-1	2	2	2	0	2	2	2	2	0	2	2	0	2	2	0	0	0	2	0
BM525	97491330	97618726	127396	2	2	2	2	2	2	2	2	2	2	2	0	2	0	2	2	0	2	2	2	0	2	2	0	2	2	-1	2	2	2	0	2	2	2	2	0	2	2	0	2	2	0	0	0	2	0
BM526	97618727	98802761	1184034	2	2	2	2	2	2	2	2	2	2	2	0	2	0	2	2	0	2	2	2	0	2	2	0	2	2	-1	2	2	2	0	2	2	2	2	0	2	2	0	2	2	0	0	0	2	0
BM529	98802762	101985831	3183069	2	2	2	2	2	2	2	2	2	2	2	-1	2	0	2	2	0	2	2	2	0	2	2	0	2	2	-1	2	2	2	0	2	2	2	2	0	2	2	0	2	2	0	0	0	2	0
BM531	101985832	101992835	7003	2	2	2	2	2	2	2	2	2	2	2	0	2	0	2	2	0	2	2	2	0	2	2	0	2	2	-1	2	2	2	0	2	2	2	2	0	2	2	0	2	2	0	0	0	2	0
BM532	101992836	102026497	33661	2	2	2	2	2	2	2	2	2	2	2	0	2	0	2	2	0	2	2	2	0	2	2	0	2	2	-1	2	2	2	0	2	2	2	2	0	2	2	0	2	2	0	0	0	2	0
BM533	102026498	102076709	50211	2	2	2	2	2	2	2	2	2	2	2	0	2	0	2	2	0	2	2	2	0	2	2	0	2	2	-1	2	2	2	0	2	2	2	2	0	2	2	0	2	2	0	0	0	2	0
BM534	102076710	102106616	29906	2	2	2	2	2	2	2	2	2	2	2	0	2	0	2	2	0	0	2	2	0	2	2	0	2	2	-1	2	2	2	0	2	2	2	2	0	2	2	0	2	2	0	0	0	2	0
BM535	102106617	102115392	8775	2	2	2	2	2	2	2	2	2	2	2	0	2	0	2	2	0	0	2	2	0	2	2	0	2	2	2	2	2	2	0	2	2	2	2	0	2	2	0	2	2	0	0	0	2	0
BM536	102115393	102210890	95497	2	2	2	2	2	2	2	2	2	2	2	0	2	0	2	2	0	0	2	2	0	2	2	0	2	2	2	2	2	2	0	2	2	2	2	0	2	2	0	2	2	0	0	0	2	0
BM537	102210891	102236128	25237	2	2	2	2	2	2	2	2	2	2	2	0	2	0	2	2	0	0	2	2	0	2	2	0	2	2	2	2	2	2	0	2	2	2	2	0	2	2	0	2	2	0	0	0	2	0
BM538	102236129	102257552	21423	2	2	2	2	2	2	2	2	2	2	2	0	2	0	2	2	0	0	2	2	0	2	2	0	2	2	2	2	2	2	2	2	2	2	2	0	2	2	0	2	2	0	0	0	2	0
BM539	102257553	102279264	21711	2	2	2	2	2	2	2	2	2	2	2	0	2	0	2	2	0	0	2	2	0	2	2	0	2	2	2	2	2	2	2	2	2	2	2	0	2	2	0	2	2	0	0	0	2	0
BM540	102279265	102350808	71543	2	2	2	2	2	2	2	2	2	2	2	0	2	0	2	2	0	0	2	2	0	2	2	0	2	2	2	2	2	2	2	2	2	2	2	0	2	2	0	2	2	0	0	0	2	0
BM541	102350809	102475259	124450	2	2	2	2	2	2	2	2	2	2	2	0	2	0	2	2	0	0	2	2	0	2	2	0	2	2	2	2	2	2	2	2	2	2	2	0	2	2	0	2	2	0	0	0	2	0
BM542	102475260	102504508	29248	2	2	2	2	2	2	2	2	2	2	2	0	2	0	2	2	0	0	2	2	0	2	2	0	2	2	2	2	2	2	2	2	2	2	2	0	2	2	0	2	2	0	0	0	2	0
BM543	102504509	102966500	461991	2	2	2	2	2	2	2	2	2	2	2	0	2	0	2	2	0	0	2	2	0	2	2	0	2	2	2	2	2	2	2	2	2	2	2	0	2	2	0	2	2	0	0	0	2	0
BM545	102966501	103177010	210509	2	2	2	2	2	2	2	2	2	2	2	0	2	0	2	2	0	0	2	2	0	2	2	0	2	2	-1	2	2	2	2	2	2	2	2	0	2	2	0	2	2	0	0	0	2	0
BM546	103177011	103455655	278644	2	2	2	2	2	2	2	2	2	2	2	0	2	0	2	2	0	0	2	2	0	2	2	0	2	2	2	2	2	2	2	2	2	2	2	0	2	2	0	2	2	0	0	0	2	0
BM547	103455656	103511401	55745	2	2	2	2	2	2	2	2	2	2	2	0	2	0	2	2	0	0	2	2	0	2	2	0	2	2	2	2	2	2	2	2	2	2	2	0	2	2	0	2	2	0	0	0	2	0
BM544	103511402	103549886	38484	2	2	2	2	2	2	2	2	2	2	2	0	2	0	2	2	0	0	2	2	0	2	2	0	2	2	-1	2	2	2	2	2	2	2	2	0	2	2	0	2	2	0	0	0	2	0
BM548	103549887	103968800	418913	2	2	2	2	2	2	2	2	2	2	2	0	2	0	2	2	0	0	2	2	0	2	2	0	2	2	-1	2	2	2	2	2	2	2	2	0	2	2	0	2	2	0	0	0	2	0
BM549	103968801	104345951	377150	2	2	2	2	2	2	2	2	2	2	2	0	2	0	2	2	0	0	2	2	0	2	2	0	2	2	-1	2	2	2	2	2	2	2	2	0	2	2	0	2	2	0	0	0	2	0
BM550	104345952	104764655	418703	2	2	2	2	2	2	2	2	2	2	2	0	2	0	2	2	0	0	2	2	0	2	2	0	2	2	-1	2	2	2	2	2	2	2	2	0	2	2	0	2	2	0	0	0	2	0
BM551	104764656	104801523	36867	2	2	2	2	2	2	2	2	2	2	2	0	2	0	2	2	0	0	2	2	0	2	2	0	2	2	-1	2	2	2	2	2	2	2	2	0	2	2	0	2	2	0	0	0	2	0
BM552	104801524	104902503	100979	2	2	2	2	2	2	2	2	2	2	2	0	2	0	2	2	0	0	2	2	0	2	2	0	2	2	-1	2	2	2	2	2	2	2	2	0	2	2	0	2	2	0	0	0	2	0
BM553	104902504	104912305	9801	2	2	2	2	2	2	2	2	2	2	2	0	2	0	2	2	0	0	2	2	0	2	2	0	2	2	-1	2	2	2	2	2	2	2	2	0	2	2	0	2	2	0	0	0	2	0
BM554	104912306	104951427	39121	2	2	2	2	2	2	2	2	2	2	2	0	2	0	2	2	0	0	2	2	0	2	2	0	2	2	-1	2	2	2	2	2	2	2	2	0	2	2	0	2	2	0	0	0	2	0
BM558	104951428	104993711	42283	2	2	2	2	2	2	2	2	2	2	2	0	2	0	2	2	0	0	2	2	0	2	2	0	2	2	-1	2	2	2	2	2	2	2	2	0	2	2	0	2	2	0	0	0	2	0
BM555	104993712	105048145	54433	2	2	2	2	2	2	2	2	2	2	2	0	2	0	2	2	0	0	2	2	0	2	2	0	2	2	-1	2	2	2	2	2	2	2	2	0	2	2	0	2	2	0	0	0	2	0
BM557	105048146	105125774	77628	2	2	2	2	2	2	2	2	2	2	2	0	2	0	2	2	0	0	2	2	0	2	2	0	2	2	-1	2	2	2	2	2	2	2	2	0	2	2	0	2	2	0	0	0	2	0
BM559	105125775	105304671	178896	2	2	2	2	2	2	2	2	2	2	2	0	2	0	2	2	0	0	2	2	0	2	2	0	2	2	-1	2	2	2	2	2	2	2	2	0	2	2	0	2	2	0	0	0	2	0
BM556	105304672	105325220	20548	2	2	2	2	2	2	2	2	2	2	2	0	2	0	2	2	0	0	2	2	0	2	2	0	2	2	-1	2	2	2	2	2	2	2	2	0	2	2	0	2	2	0	0	0	2	0
BM560	105325221	105373389	48168	2	2	2	2	2	2	2	2	2	2	2	0	2	0	2	2	0	0	2	2	0	2	2	0	2	2	-1	2	2	2	2	2	2	2	2	0	2	2	0	2	2	0	0	0	2	0
BM561	105373390	105421655	48265	2	2	2	2	2	2	2	2	2	2	2	0	2	0	2	2	0	0	2	2	0	2	2	0	2	2	-1	2	2	2	2	2	2	2	2	0	2	2	0	2	2	0	0	0	2	0
BM562	105421656	105665636	243980	2	2	2	2	2	2	2	2	2	2	2	0	2	0	2	2	0	0	2	2	0	2	2	0	2	2	-1	2	2	2	2	2	2	2	2	0	2	2	0	2	2	0	0	0	2	0
BM564	105665637	105685111	19474	2	2	2	2	2	2	2	2	2	2	2	-1	2	0	2	2	0	0	2	2	0	2	2	0	2	2	-1	2	2	2	2	2	2	2	2	0	2	2	0	2	2	0	0	0	2	0
BM565	105685112	105736300	51188	2	2	2	2	2	2	2	2	2	2	2	-1	2	0	2	2	0	0	2	2	0	2	2	0	2	2	-1	2	2	2	2	2	2	2	2	0	2	2	0	2	2	0	0	0	2	0
BM566	105736301	105790113	53812	2	2	2	2	2	2	2	2	2	2	2	-1	2	0	2	2	0	0	2	2	0	2	2	0	2	2	-1	2	2	2	2	2	2	2	2	0	2	2	0	2	2	0	0	0	2	0
BM567	105790114	105840230	50116	2	2	2	2	2	2	2	2	2	2	2	-1	2	0	2	2	0	0	2	2	0	2	2	0	2	2	-1	2	2	2	2	2	2	2	2	0	2	2	0	2	2	0	0	0	2	0
BM563	105840231	105880164	39933	2	2	2	2	2	2	2	2	2	2	2	-1	2	0	2	2	0	0	2	2	0	2	2	0	2	2	-1	2	2	2	2	2	2	2	2	0	2	2	0	2	2	0	0	0	2	0
BM568	105880165	105931841	51676	2	2	2	2	2	2	2	2	2	2	2	2	2	0	2	2	-1	0	2	2	0	2	2	0	2	2	-1	2	2	2	2	2	2	2	2	0	2	2	0	2	2	0	0	0	2	0
BM569	105931842	105957501	25659	2	2	2	2	2	2	2	2	2	2	2	2	2	0	2	2	-1	0	2	2	0	2	2	0	2	2	-1	2	2	2	2	2	2	2	2	0	2	2	0	2	2	0	0	0	2	0
BM570	105957502	105977577	20075	2	2	2	2	2	2	2	2	2	2	2	2	2	0	2	2	-1	0	2	2	0	2	2	0	2	2	-1	2	2	2	2	2	2	2	2	0	2	2	0	2	2	0	0	0	2	0
BM571	105977578	106027498	49920	2	2	2	2	2	2	2	2	2	2	2	2	2	0	2	2	-1	0	2	2	0	2	2	0	2	2	-1	2	2	2	2	2	2	2	2	0	2	2	0	2	2	0	0	0	2	0
BM572	106027499	106059339	31840	2	2	2	2	2	2	2	2	2	2	2	2	2	0	2	2	-1	0	2	2	0	2	2	0	2	2	2	2	2	2	2	2	2	2	2	0	2	2	0	2	2	0	0	0	2	0
BM573	106059340	106091280	31940	2	2	2	2	2	2	2	2	2	2	2	2	2	0	2	2	-1	0	2	2	0	2	2	0	2	2	2	2	2	2	2	2	2	2	2	0	2	2	0	2	2	0	0	0	2	0
BM574	106091281	106137217	45936	2	2	2	2	2	2	2	2	2	2	2	2	2	0	2	2	0	0	2	2	0	2	2	0	2	2	2	2	2	2	2	2	2	2	2	0	2	2	0	2	2	0	0	0	2	0
BM575	106137218	106146850	9632	2	2	2	2	2	2	2	2	2	2	2	-1	2	0	2	2	0	0	2	2	0	2	2	0	2	2	2	2	2	2	2	2	2	2	2	0	2	2	0	2	2	0	0	0	2	0
BM576	106146851	106189337	42486	2	2	2	2	2	2	2	2	2	2	2	-1	2	0	2	2	0	0	2	2	0	2	2	0	2	2	-1	2	2	2	2	2	2	2	2	0	2	2	0	2	2	0	0	0	2	0
BM577	106189338	106243747	54409	2	2	2	2	2	2	2	2	2	2	2	-1	2	0	2	2	0	0	2	2	0	2	2	0	2	2	-1	2	2	2	2	2	2	2	2	0	2	2	0	2	2	0	0	0	2	0
BM578	106243748	106379721	135973	2	2	2	2	2	2	2	2	2	2	2	-1	2	0	2	2	0	0	2	2	0	2	2	0	2	2	0	2	2	2	2	2	2	2	2	0	2	2	0	2	2	0	0	0	2	0
BM579	106379722	106532783	153061	2	2	2	2	2	2	2	2	2	2	2	-1	2	0	2	2	0	0	2	2	0	2	2	0	2	2	0	2	2	2	2	2	2	2	2	0	2	2	0	2	2	0	0	0	2	0
BM581	106532784	106609981	77197	2	2	2	2	2	2	2	2	2	2	2	-1	2	0	2	2	0	0	2	2	0	2	2	0	2	2	0	2	2	2	2	2	2	2	2	0	2	2	0	2	2	0	0	0	2	0
BM580	106609982	106710595	100613	2	2	2	2	2	2	2	2	2	2	2	-1	2	0	2	2	0	0	2	2	0	2	2	0	2	2	0	2	2	2	2	2	2	2	2	0	2	2	0	2	2	0	0	0	2	0
BM582	106710596	106805527	94931	2	2	2	2	2	2	2	2	2	2	2	-1	2	0	2	2	0	0	2	2	0	2	2	0	2	2	-1	2	2	2	2	2	2	2	2	0	2	2	0	2	2	0	0	0	2	0
BM583	106805528	106939634	134106	2	2	2	2	2	2	2	2	2	2	2	-1	2	0	2	2	0	0	2	2	0	2	2	0	2	2	-1	2	2	2	2	2	2	2	2	0	2	2	0	2	2	0	0	0	2	0
BM584	106939635	106947862	8227	2	2	2	2	2	2	2	2	2	2	2	-1	2	0	2	2	0	0	2	2	0	2	2	0	2	2	-1	2	2	2	2	2	2	2	2	0	2	2	0	2	2	0	0	0	2	0
BM585	106947863	107028637	80774	2	2	2	2	2	2	2	2	2	2	2	-1	2	0	2	2	0	0	2	2	0	2	2	0	2	2	-1	2	2	2	2	2	2	2	2	0	2	2	0	2	2	0	0	0	2	0
BM586	107028638	107121507	92869	2	2	2	2	2	2	2	2	2	2	2	-1	2	0	2	2	0	0	2	2	0	2	2	0	2	2	-1	2	2	2	2	2	2	2	2	0	2	2	0	2	2	0	0	0	2	0
BM587	107121508	107127578	6070	2	2	2	2	2	2	2	2	2	2	2	0	2	0	2	2	0	0	2	2	0	2	2	0	2	2	-1	2	2	2	2	2	2	2	2	0	2	2	0	2	2	0	0	0	2	0
BM588	107127579	107260832	133253	2	2	2	2	2	2	2	2	2	2	2	0	2	0	2	2	0	0	2	2	0	2	2	0	2	2	0	2	2	2	2	2	2	2	2	0	2	2	0	2	2	0	0	0	2	0
BM589	107260833	107343260	82427	2	2	2	2	2	2	2	2	2	2	2	-1	2	0	2	2	0	0	2	2	0	2	2	0	2	2	0	2	2	2	2	2	2	2	2	0	2	2	0	2	2	0	0	0	2	0
BM590	107343261	107363876	20615	2	2	2	2	2	2	2	2	2	2	2	0	2	0	2	2	0	0	2	2	0	2	2	0	2	2	0	2	2	2	2	2	2	2	2	0	2	2	0	2	2	0	0	0	2	0
BM591	107363877	107396962	33085	2	2	2	2	2	2	2	2	2	2	2	0	2	0	2	2	0	0	2	2	0	2	2	0	2	2	0	2	2	2	2	2	2	2	2	0	2	2	0	2	2	0	0	0	2	0
BM592	107396963	107453728	56765	2	2	2	2	2	2	2	2	2	2	2	0	2	0	2	2	0	0	2	2	0	2	2	0	2	2	0	2	2	2	2	2	2	2	2	0	2	2	0	2	2	0	0	0	2	0
BM593	107453729	107481556	27827	2	2	2	2	2	2	2	2	2	2	2	-1	2	0	2	2	0	0	2	2	0	2	2	0	2	2	0	2	2	2	2	2	2	2	2	0	2	2	0	2	2	0	0	0	2	0
BM594	107481557	107490960	9403	2	2	2	2	2	2	2	2	2	2	2	-1	2	0	2	2	0	0	2	2	0	2	2	0	2	2	-1	2	2	2	2	2	2	2	2	0	2	2	0	2	2	0	0	0	2	0
BM595	107490961	107575851	84890	2	2	2	2	2	2	2	2	2	2	2	-1	2	0	2	2	0	0	2	2	0	2	2	0	2	2	-1	2	2	2	2	2	2	2	2	0	2	2	0	2	2	0	0	0	2	0
BM596	107575852	107600381	24529	2	2	2	2	2	2	2	2	2	2	2	-1	2	0	2	2	0	0	2	2	0	2	2	0	2	2	-1	2	2	2	2	2	2	2	2	0	2	2	0	2	2	0	0	0	2	0
BM597	107600382	107613361	12979	2	2	2	2	2	2	2	2	2	2	2	-1	2	0	2	2	0	0	2	2	0	2	2	0	2	2	-1	2	2	2	2	2	2	2	2	0	2	2	0	2	2	0	0	0	2	0
BM599	107613362	107685173	71811	2	2	2	2	2	2	2	2	2	2	2	0	2	0	2	2	0	0	2	2	0	2	2	0	2	2	-1	2	2	2	2	2	2	2	2	0	2	2	0	2	2	0	0	0	2	0
BM598	107685174	107849545	164371	2	2	2	2	2	2	2	2	2	2	2	0	2	0	2	2	0	0	2	2	0	2	2	0	2	2	0	2	2	2	2	2	2	2	2	0	2	2	0	2	2	0	0	0	2	0
BM600	107849546	108096180	246634	2	2	2	2	2	2	2	2	2	2	2	0	2	0	2	2	0	0	2	2	0	2	2	0	2	2	2	2	2	2	2	2	2	2	2	0	2	2	0	2	2	0	0	0	2	0
BM601	108096181	108193338	97157	2	2	2	2	2	2	2	2	2	2	2	0	2	0	2	2	0	0	2	2	0	2	2	0	2	2	2	2	2	2	2	2	2	2	2	0	2	2	0	2	2	0	0	0	2	0
BM602	108193339	108226947	33608	2	2	2	2	2	2	2	2	2	2	2	0	2	0	2	2	0	0	2	2	0	2	2	0	2	2	2	2	2	2	2	2	2	2	2	0	2	2	0	2	2	0	0	0	2	0
BM603	108226948	108286423	59475	2	2	2	2	2	2	2	2	2	2	2	0	2	0	2	2	0	0	2	2	0	2	2	0	2	2	-1	2	2	2	2	2	2	2	2	0	2	2	0	2	2	0	0	0	2	0
BM604	108286424	108357278	70854	2	2	2	2	2	2	2	2	2	2	2	0	2	0	2	2	0	0	2	2	0	2	2	0	2	2	-1	2	2	2	2	2	2	2	2	0	2	2	0	2	2	0	0	0	2	0
BM605	108357279	108365216	7937	2	2	2	2	2	2	2	2	2	2	2	0	2	0	2	2	0	0	2	2	0	2	2	0	2	2	-1	2	2	2	2	2	2	2	2	0	2	2	0	2	2	0	0	0	2	0
BM609	108365217	108420818	55601	2	2	2	2	2	2	2	2	2	2	2	0	2	0	2	2	0	0	2	2	0	2	2	0	2	2	-1	2	2	2	2	2	2	2	2	0	2	2	0	2	2	0	0	0	2	0
BM606	108420819	108442870	22051	2	2	2	2	2	2	2	2	2	2	2	0	2	0	2	2	0	0	2	2	0	2	2	0	2	2	-1	2	2	2	2	2	2	2	2	0	2	2	0	2	2	0	0	0	2	0
BM607	108442871	108481672	38801	2	2	2	2	2	2	2	2	2	2	2	0	2	0	2	2	0	0	2	2	0	2	2	0	2	2	-1	2	2	2	2	2	2	2	2	0	2	2	0	2	2	0	0	0	2	0
BM608	108481673	108621022	139349	2	2	2	2	2	2	2	2	2	2	2	0	2	0	2	2	0	0	2	2	0	2	2	0	2	2	-1	2	2	2	2	2	2	2	2	0	2	2	0	2	2	0	0	0	2	0
BM610	108621023	108634601	13578	2	2	2	2	2	2	2	2	2	2	2	0	2	0	2	2	0	0	2	2	0	2	2	0	2	2	-1	2	2	2	2	2	2	2	2	0	2	2	0	2	2	0	0	0	2	0
BM611	108634602	108723678	89076	2	2	2	2	2	2	2	2	2	2	2	0	2	0	2	2	0	0	2	2	0	2	2	0	2	2	0	2	2	2	2	2	2	2	2	0	2	2	0	2	0	0	0	0	2	0
BM612	108723679	108823406	99727	2	2	2	2	2	2	2	2	2	2	2	0	2	0	2	2	0	0	2	2	0	2	2	0	2	2	0	2	2	2	2	2	2	2	2	0	2	2	0	2	0	0	0	0	2	0
BM614	108823407	108901007	77600	2	2	2	2	2	2	2	2	2	2	2	0	2	0	2	2	0	0	2	2	0	2	2	0	2	2	0	2	2	2	2	2	2	2	2	0	2	2	0	2	0	0	0	0	2	0
BM613	108901008	108958354	57346	2	2	2	2	2	2	2	2	2	2	2	0	2	0	2	2	0	0	2	2	0	2	2	0	2	2	0	2	2	2	2	2	2	2	2	0	2	2	0	2	0	0	0	0	2	0
BM615	108958355	109006352	47997	2	2	2	2	2	2	2	2	2	2	2	0	2	0	2	2	0	0	2	2	0	2	2	0	2	2	0	2	2	2	2	2	2	2	2	0	2	2	0	2	0	0	0	0	2	0
BM616	109006353	109242421	236068	2	2	2	2	2	2	2	2	2	2	2	0	2	0	2	2	0	0	2	2	0	2	2	0	2	2	-1	2	2	2	2	2	2	2	2	0	2	2	0	2	0	0	0	0	2	0
BM619	109242422	109383253	140831	2	2	2	2	2	2	2	2	2	2	2	0	2	0	2	2	0	0	2	2	0	2	2	0	2	2	-1	2	2	2	2	2	2	2	2	0	2	2	0	2	0	0	0	0	2	0
BM621	109383254	109669413	286159	2	2	2	2	2	2	2	2	2	2	2	0	2	0	2	2	0	0	2	2	0	2	2	0	2	2	-1	2	2	2	2	2	2	2	2	0	2	2	0	2	0	0	0	0	2	0
BM618	109669414	109727882	58468	2	2	2	2	2	2	2	2	2	2	2	0	2	0	2	2	0	0	2	2	0	2	2	0	2	2	-1	2	2	2	2	2	2	2	2	0	2	2	0	2	0	0	0	0	2	0
BM617	109727883	109814266	86383	2	2	2	2	2	2	2	2	2	2	2	0	2	0	2	2	0	0	2	2	0	2	2	0	2	2	-1	2	2	2	2	2	2	2	2	0	2	2	0	2	0	0	0	0	2	0
BM620	109814267	109943358	129091	2	2	2	2	2	2	2	2	2	2	2	0	2	0	2	2	0	0	2	2	0	2	2	0	2	2	-1	2	2	2	2	2	2	2	2	0	2	2	0	2	0	0	0	0	2	0
BM622	109943359	110081946	138587	2	2	2	2	2	2	2	2	2	2	2	0	2	0	2	2	0	0	2	2	0	2	2	0	2	2	-1	2	2	2	2	2	2	2	2	0	2	2	0	2	0	0	0	0	2	0
BM623	110081947	110168392	86445	2	2	2	2	2	2	2	2	2	2	2	0	2	0	2	2	0	0	2	2	0	2	2	0	2	2	0	2	2	2	2	2	2	2	2	0	2	2	0	2	0	0	0	0	2	0
BM624	110168393	110213688	45295	2	2	2	2	2	2	2	2	2	2	2	0	2	0	2	2	0	0	2	2	0	2	2	0	2	2	0	2	2	2	2	2	2	2	2	0	2	2	0	2	0	0	0	0	2	0
BM625	110213689	110353766	140077	2	2	2	2	2	2	2	2	2	2	2	0	2	0	2	2	0	0	2	2	0	2	2	0	2	2	0	2	2	2	2	2	2	2	2	0	2	2	0	2	0	0	0	0	2	0
BM626	110353767	110493136	139369	2	2	2	2	2	2	2	2	2	2	2	0	2	0	2	2	0	0	2	2	0	2	2	0	2	2	-1	2	2	2	2	2	2	2	2	0	2	2	0	2	0	0	0	0	2	0
BM627	110493137	110513825	20688	2	2	2	2	2	2	2	2	2	2	2	0	2	0	2	2	0	0	2	2	0	2	2	0	2	2	-1	2	2	2	2	2	2	2	2	0	2	2	0	2	0	0	0	0	2	0
BM628	110513826	110616926	103100	2	2	2	2	2	2	2	2	2	2	2	0	2	0	2	2	0	0	2	2	0	2	2	0	2	2	-1	2	2	2	2	2	2	2	2	0	2	2	0	2	0	0	0	0	2	0
BM629	110616927	110625604	8677	2	2	2	2	2	2	2	2	2	2	2	0	2	0	2	2	0	0	2	2	0	2	2	0	2	2	0	2	2	2	2	2	2	2	2	0	2	2	0	2	0	0	0	0	2	0
BM630	110625605	110818054	192449	2	2	2	2	2	2	2	2	2	2	2	0	2	0	2	2	0	0	2	2	0	2	2	0	2	2	0	2	2	2	2	2	2	2	2	0	2	2	0	2	0	0	0	0	2	0
BM631	110818055	110914183	96128	2	2	2	2	2	2	2	2	2	2	2	0	2	0	2	2	0	0	2	2	0	2	2	0	2	2	0	2	2	2	2	2	2	2	2	0	2	2	0	2	0	0	0	0	2	0
BM632	110914184	110931941	17757	2	2	2	2	2	2	2	2	2	2	2	0	2	0	2	2	0	0	2	2	0	2	2	0	2	2	-1	2	2	2	2	2	2	2	2	0	2	2	0	2	0	0	0	0	2	0
BM633	110931942	113285353	2353411	2	2	2	2	2	2	0	2	2	2	2	0	2	0	2	2	0	0	2	2	0	2	2	0	2	2	-1	2	2	2	2	2	2	2	2	0	2	2	0	2	0	0	0	0	2	0
BM634	113285354	114573410	1288056	2	2	2	2	2	2	0	2	2	2	2	0	2	0	2	2	0	0	2	2	0	2	2	0	2	2	-1	2	2	2	2	2	2	2	2	0	2	2	0	2	0	0	0	0	2	0
BM636	114573411	116991812	2418401	2	2	2	2	2	2	0	2	2	2	2	0	2	0	2	2	0	0	2	2	0	2	2	0	2	2	-1	2	2	2	2	2	2	2	2	0	2	2	0	2	0	0	0	0	2	0
BM635	116991813	119767002	2775189	2	2	2	2	2	2	0	2	2	2	2	0	2	0	2	2	0	0	2	2	0	2	2	0	2	2	-1	2	2	2	2	2	2	2	2	0	2	2	0	2	0	0	0	0	2	0
BM637	119767003	120492236	725233	2	2	2	2	2	2	0	2	2	2	2	0	2	0	2	2	0	0	2	2	0	2	2	0	2	2	-1	2	2	2	2	2	2	2	2	0	2	2	0	2	0	0	0	0	2	0
BM638	120492237	121996538	1504301	2	2	2	2	2	2	0	2	2	2	2	0	2	0	2	2	0	0	2	2	0	2	2	0	2	2	2	2	2	2	2	2	2	2	2	0	2	2	0	2	0	0	0	0	2	0
BM639	121996539	123645620	1649081	2	2	2	2	2	2	0	2	2	2	2	0	2	0	2	2	0	0	2	2	0	2	2	0	2	2	2	2	2	2	2	2	2	2	2	0	2	2	0	2	0	0	0	0	2	0
BM640	123645621	124154372	508751	2	2	2	2	2	2	0	2	2	2	2	0	2	0	2	2	0	0	2	2	0	2	2	0	2	2	2	2	2	2	2	2	2	2	2	0	2	2	0	2	0	0	0	0	2	0
BM641	124154373	126795305	2640932	2	2	2	2	2	2	0	2	2	2	2	0	2	0	2	2	0	0	2	2	0	2	2	0	2	2	2	2	2	2	2	2	2	2	2	0	2	2	0	2	0	0	0	0	2	0
BM643	126795306	127772885	977579	2	2	2	2	2	2	0	2	2	2	2	0	2	0	2	2	0	0	2	2	0	2	2	0	2	2	2	2	2	2	2	2	2	2	2	0	2	2	0	2	0	0	0	0	2	0
BM645	127772886	127824268	51382	2	2	2	2	2	2	0	2	2	2	2	0	2	0	2	2	0	0	2	2	0	2	2	0	2	2	2	2	2	2	2	2	2	2	2	0	2	2	0	2	0	0	0	0	2	0
BM647	127824269	127929977	105708	2	2	2	2	2	2	0	2	2	2	2	0	2	0	2	2	0	0	2	2	0	2	2	0	2	2	2	2	2	2	2	2	2	2	2	0	2	2	0	2	0	0	0	0	2	0
BM649	127929978	128044116	114138	2	2	2	2	2	2	0	2	2	2	2	0	2	0	2	2	0	0	2	2	0	2	2	0	2	2	2	2	2	2	2	2	2	2	2	0	2	2	0	2	0	0	0	0	2	0
BM642	128044117	128110992	66875	2	2	2	2	2	2	0	2	2	2	2	0	2	0	2	2	0	0	2	2	0	2	2	0	2	2	2	2	2	2	2	2	2	2	2	0	2	2	0	2	0	0	0	0	2	0
BM644	128110993	128375264	264271	2	2	2	2	2	2	0	2	2	2	2	0	2	0	2	2	0	0	2	2	0	2	2	0	2	2	2	2	2	2	2	2	2	2	2	0	2	2	0	2	0	0	0	0	2	0
BM646	128375265	129060094	684829	2	2	2	2	2	2	0	2	2	2	2	0	2	0	2	2	0	0	2	2	0	2	2	0	2	2	2	2	2	2	2	2	2	2	2	0	2	2	0	2	0	0	0	0	2	0
BM648	129060095	129201435	141340	2	2	2	2	2	2	0	2	2	2	2	0	2	0	2	2	0	0	2	2	0	2	2	0	2	2	2	2	2	2	2	2	2	2	2	0	2	2	0	2	0	0	0	0	2	0
BM650	129201436	129870929	669493	2	2	2	2	2	2	0	2	2	2	2	0	2	0	2	2	0	0	2	2	0	2	2	0	2	2	2	2	2	2	2	2	2	2	2	0	2	2	0	2	0	0	0	0	2	0
BM652	129870930	129986214	115284	2	2	2	2	2	2	0	2	2	2	2	0	2	0	2	2	0	0	2	2	0	2	2	0	2	2	2	2	2	2	2	2	2	2	2	0	2	2	0	2	0	0	0	0	2	0
BM653	129986215	130389370	403155	2	2	2	2	2	2	0	2	2	2	2	0	2	0	2	2	0	0	2	2	0	2	2	0	2	2	2	2	2	2	2	2	2	2	2	0	2	2	0	2	0	0	0	0	2	0
BM655	130389371	130473503	84132	2	2	2	2	2	2	0	2	2	2	2	0	2	0	2	2	0	0	2	2	0	2	2	0	2	2	2	2	2	2	2	2	2	2	2	0	2	2	0	2	0	0	0	0	2	0
BM657	130473504	130562609	89105	2	2	2	2	2	2	0	2	2	2	2	0	2	0	2	2	0	0	2	2	0	2	2	0	2	2	2	2	2	2	2	2	2	2	2	0	2	2	0	2	0	0	0	0	2	0
BM651	130562610	131170337	607727	2	2	2	2	2	2	0	2	2	2	2	0	2	0	2	2	0	0	2	2	0	2	2	0	2	2	2	2	2	2	2	2	2	2	2	0	2	2	0	2	0	0	0	0	2	0
BM654	131170338	131564396	394058	2	2	2	2	2	2	0	2	2	2	2	0	2	0	2	2	0	0	2	2	0	2	2	0	2	2	2	2	2	2	2	2	2	2	2	0	2	2	0	2	0	0	0	0	2	0
BM656	131564397	132447458	883061	2	2	2	2	2	2	0	2	2	2	2	0	2	0	2	2	0	0	2	2	0	2	2	0	2	2	2	2	2	2	2	2	2	2	2	0	2	2	0	2	0	0	0	0	2	0
BM661	132447459	132472194	24735	2	2	2	2	2	2	0	2	2	2	2	0	2	0	2	2	0	0	2	2	0	2	2	0	2	2	2	2	2	2	2	2	2	2	2	0	2	2	0	2	0	0	0	0	2	0
BM663	132472195	132540791	68596	2	2	2	2	2	2	0	2	2	2	2	0	2	0	2	2	0	0	2	2	0	2	2	0	2	2	2	2	2	2	2	2	2	2	2	0	2	2	0	2	0	0	0	0	2	0
BM658	132540792	132720948	180156	2	2	2	2	2	2	0	2	2	2	2	0	2	0	2	2	0	0	2	2	0	2	2	0	2	2	2	2	2	2	2	2	2	2	2	0	2	2	0	2	0	0	0	0	2	0
BM659	132720949	133038489	317540	2	2	2	2	2	2	0	2	2	2	2	0	2	0	2	2	0	0	2	2	0	2	2	0	2	2	2	2	2	2	2	2	2	2	2	0	2	2	0	2	0	0	0	0	2	0
BM660	133038490	133173701	135211	2	2	2	2	2	2	0	2	2	2	2	0	2	0	2	2	0	0	2	2	0	2	2	0	2	2	2	2	2	2	2	2	2	2	2	0	2	2	0	2	0	0	0	0	2	0
BM662	133173702	133242789	69087	2	2	2	2	2	2	0	2	2	2	2	0	2	0	2	2	0	0	2	2	0	2	2	0	2	2	2	2	2	2	2	2	2	2	2	0	2	2	0	2	0	0	0	0	2	0
BM664	133242790	133418845	176055	2	2	2	2	2	2	0	2	2	2	2	0	2	0	2	2	0	0	2	2	0	2	2	0	2	2	2	2	2	2	2	2	2	2	2	0	2	2	0	2	0	0	0	0	2	0
BM666	133418846	133466910	48064	2	2	2	2	2	2	0	2	2	2	2	0	2	0	2	2	0	0	2	2	0	2	2	0	2	2	2	2	2	2	2	2	2	2	2	0	2	2	0	2	0	0	0	0	2	0
BM668	133466911	135285744	1818833	2	2	2	2	2	2	0	2	2	2	2	0	2	0	2	2	0	0	2	2	0	2	2	0	2	2	2	2	2	2	2	2	2	2	2	0	2	2	0	2	0	0	0	0	2	0
BM669	135285745	135390025	104280	2	2	2	2	2	2	0	2	2	2	2	0	2	0	2	2	0	0	2	2	0	2	2	0	2	2	2	2	2	2	2	2	2	2	2	0	2	2	0	2	0	0	0	0	2	0
BM670	135390026	136432223	1042197	2	2	2	2	2	2	0	2	2	2	2	0	2	0	2	2	0	0	2	2	0	2	2	0	2	2	2	2	2	2	2	2	2	2	2	0	2	2	0	2	0	0	0	0	2	0
BM672	136432224	137714539	1282315	2	2	2	2	2	2	0	2	2	2	2	0	2	0	2	2	0	0	2	2	0	2	2	0	2	2	2	2	2	2	2	2	2	2	2	0	2	2	0	2	0	0	0	0	2	0
BM665	137714540	142778251	5063711	2	2	2	2	2	2	0	2	2	2	2	0	2	0	2	2	0	0	2	2	0	2	2	0	2	2	2	2	2	2	2	2	2	2	2	0	2	2	0	2	0	0	0	0	2	0
BM667	142778252	143092776	314524	2	2	2	2	2	2	0	2	2	2	2	0	2	0	2	2	0	0	2	2	0	2	2	0	2	2	2	2	2	2	2	2	2	2	2	0	2	2	0	2	0	0	0	0	2	0
BM671	143092777	145482084	2389307	2	2	2	2	2	2	0	2	2	2	2	0	2	0	2	2	0	0	2	2	0	2	2	0	2	2	2	2	2	2	2	2	2	2	2	0	2	2	0	2	0	0	0	0	2	0
BM673	145482085	145661822	179737	2	2	2	2	2	2	0	2	2	2	2	0	2	0	2	2	0	0	2	2	0	2	2	0	2	2	2	2	2	2	2	2	2	2	2	0	2	2	0	2	0	0	0	0	2	0
BM674	145661823	145965049	303226	2	2	2	2	2	2	0	2	2	2	2	0	2	0	2	2	0	0	2	2	0	2	2	0	2	2	2	2	2	2	2	2	2	2	2	0	2	2	0	2	0	0	0	0	2	0
BM675	145965050	146324215	359165	2	2	2	2	2	2	0	2	2	2	2	0	2	0	2	2	0	0	2	2	0	2	2	0	2	2	2	2	2	2	2	2	2	2	2	0	2	2	0	2	0	0	0	0	2	0
BM676	146324216	147023668	699452	2	2	2	2	2	2	0	2	2	2	2	0	2	0	2	2	0	0	2	2	0	2	2	0	2	2	2	2	2	2	2	2	2	2	2	0	2	2	0	2	0	0	0	0	2	0
BM677	147023669	147266160	242491	2	2	2	2	2	2	0	2	2	2	2	0	2	0	2	2	0	0	2	2	0	2	2	0	2	2	2	2	2	2	2	2	2	2	2	0	2	2	0	2	0	0	0	0	2	0
BM678	147266161	147480033	213872	2	2	2	2	2	2	0	2	2	2	2	0	2	0	2	2	0	0	2	2	0	2	2	0	2	2	2	2	2	2	2	2	2	2	2	0	2	2	0	2	0	0	0	0	2	0
BM679	147480034	147945916	465882	2	2	2	2	2	2	0	2	2	2	2	0	2	0	2	2	0	0	2	2	0	2	2	0	2	2	2	2	2	2	2	2	2	2	2	0	2	2	0	2	0	0	0	0	2	0
BM681	147945917	148121778	175861	2	2	2	2	2	2	0	2	2	2	2	0	2	0	2	2	0	0	2	2	0	2	2	0	2	2	2	2	2	2	2	2	2	2	2	0	2	2	0	2	0	0	0	0	2	0
BM680	148121779	148154799	33020	2	2	2	2	2	2	0	2	2	2	2	0	2	0	2	2	0	0	2	2	0	2	2	0	2	2	2	2	2	2	2	2	2	2	2	0	2	2	0	2	0	0	0	0	2	0
BM682	148154800	148372255	217455	2	2	2	2	2	2	0	2	2	2	2	0	2	0	2	2	0	0	2	2	0	2	2	0	2	2	2	2	2	2	2	2	2	2	2	0	2	2	0	2	0	0	0	0	2	0
BM683	148372256	148451105	78849	2	2	2	2	2	2	0	2	2	2	2	0	2	0	2	2	0	0	2	2	0	2	2	0	2	2	2	2	2	2	2	2	2	2	2	0	2	2	0	2	0	0	0	0	2	0
BM684	148451106	148768548	317442	2	2	2	2	2	2	0	2	2	2	2	0	2	0	2	2	0	0	2	2	0	2	2	0	2	2	2	2	2	2	2	2	2	2	2	0	2	2	0	2	0	0	0	0	2	0
BM685	148768549	151034463	2265914	2	2	2	2	2	2	0	2	2	2	2	0	2	0	2	2	0	0	2	2	0	2	2	0	2	2	2	2	2	2	2	2	2	2	2	0	2	2	0	2	0	0	0	0	2	0
BM689	151034464	151113176	78712	2	2	2	2	2	2	0	2	2	2	2	0	2	0	2	2	0	0	2	2	0	2	2	0	2	2	2	2	2	2	2	2	2	2	2	0	2	2	0	2	0	0	0	0	2	0
BM691	151113177	151255592	142415	2	2	2	2	2	2	0	2	2	2	2	0	2	0	2	2	0	0	2	2	0	2	2	0	2	2	2	2	2	2	2	2	2	2	2	0	2	2	0	2	0	0	0	0	2	0
BM688	151255593	151769486	513893	2	2	2	2	2	2	0	2	2	2	2	0	2	0	2	2	0	0	2	2	0	2	2	0	2	2	2	2	2	2	2	2	2	2	2	0	2	2	0	2	0	0	0	0	2	0
BM687	151769487	152217873	448386	2	2	2	2	2	2	0	2	2	2	2	0	2	0	2	2	0	0	2	2	0	2	2	0	2	2	2	2	2	2	2	2	2	2	2	0	2	2	0	2	0	0	0	0	2	0
BM686	152217874	152376788	158914	2	2	2	2	2	2	0	2	2	2	2	0	2	0	2	2	0	0	2	2	0	2	2	0	2	2	2	2	2	2	2	2	2	2	2	0	2	2	0	2	0	0	0	0	2	0
BM690	152376789	152862932	486143	2	2	2	2	2	2	0	2	2	2	2	0	2	0	2	2	0	0	2	2	0	2	2	0	2	2	2	2	2	2	2	2	2	2	2	0	2	2	0	2	0	0	0	0	2	0
BM692	152862933	153034902	171969	2	2	2	2	2	2	0	2	2	2	2	0	2	0	2	2	0	0	2	2	0	2	2	0	2	2	2	2	2	2	2	2	2	2	2	0	2	2	0	2	0	0	0	0	2	0
BM693	153034903	154043719	1008816	2	2	2	2	2	2	0	2	2	2	2	0	2	0	2	2	0	0	2	2	0	2	2	0	2	2	2	2	2	2	2	2	2	2	2	0	2	2	0	2	0	0	0	0	2	0
BM695	154043720	154289255	245535	2	2	2	2	2	2	0	2	2	2	2	0	2	0	2	2	0	0	2	2	0	2	2	0	2	2	2	2	2	2	2	2	2	2	2	0	2	2	0	2	0	0	0	0	2	0
BM694	154289256	155028885	739629	2	2	2	2	2	2	0	2	2	2	2	0	2	0	2	2	0	0	2	2	0	2	2	0	2	2	2	2	2	2	2	2	2	2	2	0	2	2	0	2	0	0	0	0	2	0
BM699	155028886	155047437	18551	2	2	2	2	2	2	0	2	2	2	2	0	2	0	2	2	0	0	2	2	0	2	2	0	2	2	2	2	2	2	2	2	2	2	2	0	2	2	0	2	0	0	0	0	2	0
BM697	155047438	155216809	169371	2	2	2	2	2	2	0	2	2	2	2	0	2	0	2	2	0	0	2	2	0	2	2	0	2	2	2	2	2	2	2	2	2	2	2	0	2	2	0	2	0	0	0	0	2	0
BM700	155216810	155785588	568778	2	2	2	2	2	2	0	2	2	2	2	0	2	0	2	2	0	0	2	2	0	2	2	0	2	2	2	2	2	2	2	2	2	2	2	0	2	2	0	2	0	0	0	0	2	0
BM696	155785589	155927015	141426	2	2	2	2	2	2	0	2	2	2	2	0	2	0	2	2	0	0	2	2	0	2	2	0	2	2	2	2	2	2	2	2	2	2	2	0	2	2	0	2	0	0	0	0	2	0
BM698	155927016	156339141	412125	2	2	2	2	2	2	0	2	2	2	2	0	2	0	2	2	0	0	2	2	0	2	2	0	2	2	2	2	2	2	2	2	2	2	2	0	2	2	0	2	0	0	0	0	2	0
BM701	156339142	156751683	412541	2	2	2	2	2	2	0	2	2	2	2	0	2	0	2	2	0	0	2	2	0	2	2	0	2	2	2	2	2	2	2	2	2	2	2	0	2	2	0	2	0	0	0	0	2	0
BM702	156751684	156815167	63483	2	2	2	2	2	2	0	2	2	2	2	0	2	0	2	2	0	0	2	2	0	2	2	0	2	2	2	2	2	2	2	2	2	2	2	0	2	2	0	2	0	0	0	0	2	0
BM703	156815168	156909332	94164	2	2	2	2	2	2	0	2	2	2	2	0	2	0	2	2	0	0	2	2	0	2	2	0	2	2	2	2	2	2	2	2	2	2	2	0	2	2	0	2	0	0	0	0	2	0
BM705	156909333	157086555	177222	2	2	2	2	2	2	0	2	2	2	2	0	2	0	2	2	0	0	2	2	0	2	2	0	2	2	2	2	2	2	2	2	2	2	2	0	2	2	0	2	0	0	0	0	2	0
BM704	157086556	157490447	403891	2	2	2	2	2	2	0	2	2	2	2	0	2	0	2	2	0	0	2	2	0	2	2	0	2	2	2	2	2	2	2	2	2	2	2	0	2	2	0	2	0	0	0	0	2	0
BM709	157490448	157602630	112182	2	2	2	2	2	2	0	2	2	2	2	0	2	0	2	2	0	0	2	2	0	2	2	0	2	2	2	2	2	2	2	2	2	2	2	0	2	2	0	2	0	0	0	0	2	0
BM708	157602631	157625147	22516	2	2	2	2	2	2	0	2	2	2	2	0	2	0	2	2	0	0	2	2	0	2	2	0	2	2	2	2	2	2	2	2	2	2	2	0	2	2	0	2	0	0	0	0	2	0
BM707	157625148	157752824	127676	2	2	2	2	2	2	0	2	2	2	2	0	2	0	2	2	0	0	2	2	0	2	2	0	2	2	2	2	2	2	2	2	2	2	2	0	2	2	0	2	0	0	0	0	2	0
BM706	157752825	157760193	7368	2	2	2	2	2	2	0	2	2	2	2	0	2	0	2	2	0	0	2	2	0	2	2	0	2	2	2	2	2	2	2	2	2	2	2	0	2	2	0	2	0	0	0	0	2	0
BM710	157760194	157766288	6094	2	2	2	2	2	2	0	2	2	2	2	0	2	0	2	2	0	0	2	2	0	2	2	0	2	2	2	2	2	2	2	2	2	2	2	0	2	2	0	2	0	0	0	0	2	0
BM711	157766289	157879636	113347	2	2	2	2	2	2	0	2	2	2	2	0	2	0	2	2	0	0	2	2	0	2	2	0	2	2	2	2	2	2	2	2	2	2	2	0	2	2	0	2	0	0	0	0	2	0
BM715	157879637	157891345	11708	2	2	2	2	2	2	0	2	2	2	2	0	2	0	2	2	0	0	2	2	0	2	2	0	2	2	2	2	2	2	2	2	2	2	2	0	2	2	0	2	0	0	0	0	2	0
BM716	157891346	157953539	62193	2	2	2	2	2	2	0	2	2	2	2	0	2	0	2	2	0	0	2	2	0	2	2	0	2	2	2	2	2	2	2	2	2	2	2	0	2	2	0	2	0	0	0	0	2	0
BM717	157953540	157995451	41911	2	2	2	2	2	2	0	2	2	2	2	0	2	0	2	2	0	0	2	2	0	2	2	0	2	2	2	2	2	2	2	2	2	2	2	0	2	2	0	2	0	0	0	0	2	0
BM712	157995452	158080855	85403	2	2	2	2	2	2	0	2	2	2	2	0	2	0	2	2	0	0	2	2	0	2	2	0	2	2	2	2	2	2	2	2	2	2	2	0	2	2	0	2	0	0	0	0	2	0
BM714	158080856	158139928	59072	2	2	2	2	2	2	0	2	2	2	2	0	2	0	2	2	0	0	2	2	0	2	2	0	2	2	2	2	2	2	2	2	2	2	2	0	2	2	0	2	0	0	0	0	2	0
BM713	158139929	158178035	38106	2	2	2	2	2	2	0	2	2	2	2	0	2	0	2	2	0	0	2	2	0	2	2	0	2	2	2	2	2	2	2	2	2	2	2	0	2	2	0	2	0	0	0	0	2	0
BM719	158178036	158194187	16151	2	2	2	2	2	2	0	2	2	2	2	0	2	0	2	2	0	0	2	2	0	2	2	0	2	2	2	2	2	2	2	2	2	2	2	0	2	2	0	2	0	0	0	0	2	0
BM718	158194188	158260353	66165	2	2	2	2	2	2	0	2	2	2	2	0	2	0	2	2	0	0	2	2	0	2	2	0	2	2	2	2	2	2	2	2	2	2	2	0	2	2	0	2	0	0	0	0	2	0
BM720	158260354	158350920	90566	2	2	2	2	2	2	0	2	2	2	2	0	2	0	2	2	0	0	2	2	0	2	2	0	2	2	2	2	2	2	2	2	2	2	2	0	2	2	0	2	0	0	0	0	2	0
BM721	158350921	158420619	69698	2	2	2	2	2	2	0	2	2	2	2	0	2	0	2	2	0	0	2	2	0	2	2	0	2	2	2	2	2	2	2	2	2	2	2	0	2	2	0	2	0	0	0	0	2	0
BM722	158420620	158535000	114380	2	2	2	2	2	2	0	2	2	2	2	0	2	0	2	2	0	0	2	2	0	2	2	0	2	2	2	2	2	2	2	2	2	2	2	0	2	2	0	2	0	0	0	0	2	0
BM723	158535001	158772931	237930	2	2	2	2	2	2	0	2	2	2	2	0	2	0	2	2	0	0	2	2	0	2	2	0	2	2	2	2	2	2	2	2	2	2	2	0	2	2	0	2	0	0	0	0	2	0
BM725	158772932	158907411	134479	2	2	2	2	2	2	0	2	2	2	2	0	2	0	2	2	0	0	2	2	0	2	2	0	2	2	2	2	2	2	2	2	2	2	2	0	2	2	0	2	0	0	0	0	2	0
BM729	158907412	159084770	177358	2	2	2	2	2	2	0	2	2	2	2	0	2	0	2	2	0	0	2	2	0	2	2	0	2	2	2	2	2	2	2	2	2	2	2	0	2	2	0	2	0	0	0	0	2	0
BM724	159084771	159220300	135529	2	2	2	2	2	2	0	2	2	2	2	0	2	0	2	2	0	0	2	2	0	2	2	0	2	2	2	2	2	2	2	2	2	2	2	0	2	2	0	2	0	0	0	0	2	0
BM727	159220301	159263735	43434	2	2	2	2	2	2	0	2	2	2	2	0	2	0	2	2	0	0	2	2	0	2	2	0	2	2	2	2	2	2	2	2	2	2	2	0	2	2	0	2	0	0	0	0	2	0
BM726	159263736	159351017	87281	2	2	2	2	2	2	0	2	2	2	2	0	2	0	2	2	0	0	2	2	0	2	2	0	2	2	2	2	2	2	2	2	2	2	2	0	2	2	0	2	0	0	0	0	2	0
BM728	159351018	159567812	216794	2	2	2	2	2	2	0	2	2	2	2	0	2	0	2	2	0	0	2	2	0	2	2	0	2	2	2	2	2	2	2	2	2	2	2	0	2	2	0	2	0	0	0	0	2	0
BM730	159567813	159597713	29900	2	2	2	2	2	2	0	2	2	2	2	0	2	0	2	2	0	0	2	2	0	2	2	0	2	2	2	2	2	2	2	2	2	2	2	0	2	2	0	2	0	0	0	0	2	0
BM735	159597714	159649568	51854	2	2	2	2	2	2	0	2	2	2	2	0	2	0	2	2	0	0	2	2	0	2	2	0	2	2	2	2	2	2	2	2	2	2	2	0	2	2	0	2	0	0	0	0	2	0
BM734	159649569	159664458	14889	2	2	2	2	2	2	0	2	2	2	2	0	2	0	2	2	0	0	2	2	0	2	2	0	2	2	2	2	2	2	2	2	2	2	2	0	2	2	0	2	0	0	0	0	2	0
BM733	159664459	159780535	116076	2	2	2	2	2	2	0	2	2	2	2	0	2	0	2	2	0	0	2	2	0	2	2	0	2	2	2	2	2	2	2	2	2	2	2	0	2	2	0	2	0	0	0	0	2	0
BM738	159780536	159791800	11264	2	2	2	2	2	2	0	2	2	2	2	0	2	0	2	2	0	0	2	2	0	2	2	0	2	2	2	2	2	2	2	2	2	2	2	0	2	2	0	2	0	0	0	0	2	0
BM732	159791801	160280294	488493	2	2	2	2	2	2	0	2	2	2	2	0	2	0	2	2	0	0	2	2	0	2	2	0	2	2	2	2	2	2	2	2	2	2	2	0	2	2	0	2	0	0	0	0	2	0
BM737	160280295	160325988	45693	2	2	2	2	2	2	0	2	2	2	2	0	2	0	2	2	0	0	2	2	0	2	2	0	2	2	2	2	2	2	2	2	2	2	2	0	2	2	0	2	0	0	0	0	2	0
BM731	160325989	160473615	147626	2	2	2	2	2	2	0	2	2	2	2	0	2	0	2	2	0	0	2	2	0	2	2	0	2	2	2	2	2	2	2	2	2	2	2	0	2	2	0	2	0	0	0	0	2	0
BM736	160473616	160486901	13285	2	2	2	2	2	2	0	2	2	2	2	0	2	0	2	2	0	0	2	2	0	2	2	0	2	2	2	2	2	2	2	2	2	2	2	0	2	2	0	2	0	0	0	0	2	0
BM740	160486902	160669100	182198	2	2	2	2	2	2	0	2	2	2	2	0	2	0	2	2	0	0	2	2	0	2	2	0	2	2	2	2	2	2	2	2	2	2	2	0	2	2	0	2	0	0	0	0	2	0
BM739	160669101	160776178	107077	2	2	2	2	2	2	0	2	2	2	2	0	2	0	2	2	0	0	2	2	0	2	2	0	2	2	2	2	2	2	2	2	2	2	2	0	2	2	0	2	0	0	0	0	2	0
BM742	160776179	160937392	161213	2	2	2	2	2	2	0	2	2	2	2	0	2	0	2	2	0	0	2	2	0	2	2	0	2	2	2	2	2	2	2	2	2	2	2	0	2	2	0	2	0	0	0	0	2	0
BM741	160937393	161133325	195932	2	2	2	2	2	2	0	2	2	2	2	0	2	0	2	2	0	0	2	2	0	2	2	0	2	2	2	2	2	2	2	2	2	2	2	0	2	2	0	2	0	0	0	0	2	0
BM743	161133326	161416573	283247	2	2	2	2	2	2	0	2	2	2	2	0	2	0	2	2	0	0	2	2	0	2	2	0	2	2	2	2	2	2	2	2	2	2	2	0	2	2	0	2	0	0	0	0	2	0
BM746	161416574	161565979	149405	2	2	2	2	2	2	0	2	2	2	2	0	2	0	2	2	0	0	2	2	0	2	2	0	2	2	2	2	2	2	2	2	2	2	2	0	2	2	0	2	0	0	0	0	2	0
BM745	161565980	161622076	56096	2	2	2	2	2	2	0	2	2	2	2	0	2	0	2	2	0	0	2	2	0	2	2	0	2	2	2	2	2	2	2	2	2	2	2	0	2	2	0	2	0	0	0	0	2	0
BM744	161622077	161694781	72704	2	2	2	2	2	2	0	2	2	2	2	0	2	0	2	2	0	0	2	2	0	2	2	0	2	2	2	2	2	2	2	2	2	2	2	0	2	2	0	2	0	0	0	0	2	0
BM748	161694782	161763397	68615	2	2	2	2	2	2	0	2	2	2	2	0	2	0	2	2	0	0	2	2	0	2	2	0	2	2	2	2	2	2	2	2	2	2	2	0	2	2	0	2	0	0	0	0	2	0
BM747	161763398	161826442	63044	2	2	2	2	2	2	0	2	2	2	2	0	2	0	2	2	0	0	2	2	0	2	2	0	2	2	2	2	2	2	2	2	2	2	2	0	2	2	0	2	0	0	0	0	2	0
BM749	161826443	162099080	272637	2	2	2	2	2	2	0	2	2	2	2	0	2	0	2	2	0	0	2	2	0	2	2	0	2	2	2	2	2	2	2	2	2	2	2	0	2	2	0	2	0	0	0	0	2	0
BM750	162099081	162125321	26240	2	2	2	2	2	2	0	2	2	2	2	0	2	0	2	2	0	0	2	2	0	2	2	0	2	2	2	2	2	2	2	2	2	2	2	0	2	2	0	2	0	0	0	0	2	0
BM752	162125322	162513900	388578	2	2	2	2	2	2	0	2	2	2	2	0	2	0	2	2	0	0	2	2	0	2	2	0	2	2	2	2	2	2	2	2	2	2	2	0	2	2	0	2	0	0	0	0	2	0
BM751	162513901	163324849	810948	2	2	2	2	2	2	0	2	2	2	2	0	2	0	2	2	0	0	2	2	0	2	2	0	2	2	2	2	2	2	2	2	2	2	2	0	2	2	0	2	0	0	0	0	2	0
BM753	163324850	163429441	104591	2	2	2	2	2	2	0	2	0	2	2	0	2	0	2	2	0	0	2	2	0	2	2	0	2	2	2	2	2	2	2	2	2	2	2	0	2	2	0	2	0	0	0	0	2	0
BM754	163429442	163675637	246195	2	2	2	2	2	2	0	2	0	2	2	0	2	0	2	2	0	0	2	2	0	2	2	0	2	2	2	2	2	2	2	2	2	2	2	0	2	2	0	2	0	0	0	0	2	0
BM755	163675638	163714588	38950	2	2	2	2	2	2	0	2	0	2	2	0	2	0	2	2	0	0	2	2	0	2	2	0	2	2	2	2	2	2	2	2	2	2	2	0	2	2	0	2	0	0	0	0	2	0
BM756	163714589	163726044	11455	2	2	2	2	2	2	0	2	0	2	2	0	2	0	2	2	0	0	2	2	0	2	2	0	2	2	2	2	2	2	2	2	2	2	2	0	2	2	0	2	0	0	0	0	2	0
BM757	163726045	163926123	200078	2	2	2	2	2	2	0	2	0	2	2	0	2	0	2	2	0	0	2	2	0	2	2	0	2	2	2	2	2	2	2	2	2	2	2	0	2	2	0	2	0	0	0	0	2	0
BM759	163926124	164001965	75841	2	2	2	2	2	2	0	2	0	2	2	0	2	0	2	2	0	0	2	2	0	2	2	0	2	2	2	2	2	2	2	2	2	2	2	0	2	2	0	2	0	0	0	0	2	0
BM761	164001966	164090900	88934	2	2	2	2	2	2	0	2	0	2	2	0	2	0	2	2	0	0	2	2	0	2	2	0	2	2	2	2	2	2	2	2	2	2	2	0	2	2	0	2	0	0	0	0	2	0
BM758	164090901	164170232	79331	2	2	2	2	2	2	0	2	0	2	2	0	2	0	2	2	0	0	2	2	0	2	2	0	2	2	2	2	2	2	2	2	2	2	2	0	2	2	0	2	0	0	0	0	2	0
BM760	164170233	164204080	33847	2	2	2	2	2	2	0	2	0	2	2	0	2	0	2	2	0	0	2	2	0	2	2	0	2	2	2	2	2	2	2	2	2	2	2	0	2	2	0	2	0	0	0	0	2	0
BM762	164204081	164347597	143516	2	2	2	2	2	2	0	2	0	2	2	0	2	0	2	2	0	0	2	2	0	2	2	0	2	2	2	2	2	2	2	2	2	2	2	0	2	2	0	2	0	0	0	0	2	0
BM763	164347598	164503812	156214	2	2	2	2	2	2	0	2	0	2	2	0	2	0	2	2	0	0	2	2	0	2	2	0	2	2	2	2	2	2	2	2	2	2	2	0	2	2	0	2	0	0	0	0	2	0
BM764	164503813	164658876	155063	2	2	2	2	2	2	0	2	0	2	2	0	2	0	2	2	0	0	2	2	0	2	2	0	2	2	2	2	2	2	2	2	2	2	2	0	2	2	0	2	0	0	0	0	2	0
BM767	164658877	164845565	186688	2	2	2	2	2	2	0	2	0	2	2	0	2	0	2	2	0	0	2	2	0	2	2	0	2	2	2	2	2	2	2	2	2	2	2	0	2	2	0	2	0	0	0	0	2	0
BM768	164845566	164953398	107832	2	2	2	2	2	2	0	2	0	2	2	0	2	0	2	2	0	0	2	2	0	2	2	0	2	2	2	2	2	2	2	2	2	2	2	0	2	2	0	2	0	0	0	0	2	0
BM765	164953399	165031720	78321	2	2	2	2	2	2	0	2	0	2	2	0	2	0	2	2	0	0	2	2	0	2	2	0	2	2	2	2	2	2	2	2	2	2	2	0	2	2	0	2	0	0	0	0	2	0
BM769	165031721	165127521	95800	2	2	2	2	2	2	0	2	0	2	2	0	2	0	2	2	0	0	2	2	0	2	2	0	2	2	2	2	2	2	2	2	2	2	2	0	2	2	0	2	0	0	0	0	2	0
BM766	165127522	165219742	92220	2	2	2	2	2	2	0	2	0	2	2	0	2	0	2	2	0	0	2	2	0	2	2	0	2	2	2	2	2	2	2	2	2	2	2	0	2	2	0	2	0	0	0	0	2	0
BM770	165219743	165407039	187296	2	2	2	2	2	2	0	2	0	2	2	0	2	0	2	2	0	0	2	2	0	2	2	0	2	2	2	2	2	2	2	2	2	2	2	0	2	2	0	2	0	0	0	0	2	0
BM771	165407040	165585131	178091	2	2	2	2	2	2	0	2	0	2	2	0	2	0	2	2	0	0	2	2	0	2	2	0	2	2	2	2	2	2	2	2	2	2	2	0	2	2	0	2	0	0	0	0	2	0
BM772	165585132	165675287	90155	2	2	2	2	2	2	0	2	0	2	2	0	2	0	2	2	0	0	2	2	0	2	2	0	2	2	2	2	2	2	2	2	2	2	2	0	2	2	0	2	0	0	0	0	2	0
BM775	165675288	165904269	228981	2	2	2	2	2	2	0	2	0	2	2	0	2	0	2	2	0	0	2	2	0	2	2	0	2	2	2	2	2	2	2	2	2	2	2	0	2	2	0	2	0	0	0	0	2	0
BM774	165904270	166006171	101901	2	2	2	2	2	2	0	2	0	2	2	0	2	0	2	2	0	0	2	2	0	2	2	0	2	2	2	2	2	2	2	2	2	2	2	0	2	2	0	2	0	0	0	0	2	0
BM773	166006172	166053030	46858	2	2	2	2	2	2	0	2	0	2	2	0	2	0	2	2	0	0	2	2	0	2	2	0	2	2	2	2	2	2	2	2	2	2	2	0	2	2	0	2	0	0	0	0	2	0
BM777	166053031	166112896	59865	2	2	2	2	2	2	0	2	0	2	2	0	2	0	2	2	0	0	2	2	0	2	2	0	2	2	2	2	2	2	2	2	2	2	2	0	2	2	0	2	0	0	0	0	2	0
BM776	166112897	166221839	108942	2	2	2	2	2	2	0	2	0	2	2	0	2	0	2	2	0	0	2	2	0	2	2	0	2	2	2	2	2	2	2	2	2	2	2	0	2	2	0	2	0	0	0	0	2	0
BM778	166221840	166292737	70897	2	2	2	2	2	2	0	2	0	2	2	0	2	0	2	2	0	0	2	2	0	2	2	0	2	2	2	2	2	2	2	2	2	2	2	0	2	2	0	2	0	0	0	0	2	0
BM780	166292738	166345089	52351	2	2	2	2	2	2	0	2	0	2	2	0	2	0	2	2	0	0	2	2	0	2	2	0	2	2	2	2	2	2	2	2	2	2	2	0	2	2	0	2	0	0	0	0	2	0
BM779	166345090	166380103	35013	2	2	2	2	2	2	0	2	0	2	2	0	2	0	2	2	0	0	2	2	0	2	2	0	2	2	2	2	2	2	2	2	2	2	2	0	2	2	0	2	0	0	0	0	2	0
BM783	166380104	166389458	9354	2	2	2	2	2	2	0	2	0	2	2	0	2	0	2	2	0	0	2	2	0	2	2	0	2	2	2	2	2	2	2	2	2	2	2	0	2	2	0	2	0	0	0	0	2	0
BM786	166389459	166505096	115637	2	2	2	2	2	2	0	2	0	2	2	0	2	0	2	2	0	0	2	2	0	2	2	0	2	2	2	2	2	2	2	2	2	2	2	0	2	2	0	2	0	0	0	0	2	0
BM781	166505097	166603074	97977	2	2	2	2	2	2	0	2	0	2	2	0	2	0	2	2	0	0	2	2	0	2	2	0	2	2	2	2	2	2	2	2	2	2	2	0	2	2	0	2	0	0	0	0	2	0
BM785	166603075	166620733	17658	2	2	2	2	2	2	0	2	0	2	2	0	2	0	2	2	0	0	2	2	0	2	2	0	2	2	2	2	2	2	2	2	2	2	2	0	2	2	0	2	0	0	0	0	2	0
BM782	166620734	166706729	85995	2	2	2	2	2	2	0	2	0	2	2	0	2	0	2	2	0	0	2	2	0	2	2	0	2	2	2	2	2	2	2	2	2	2	2	0	2	2	0	2	0	0	0	0	2	0
BM784	166706730	166750134	43404	2	2	2	2	2	2	0	2	0	2	2	0	2	0	2	2	0	0	2	2	0	2	2	0	2	2	2	2	2	2	2	2	2	2	2	0	2	2	0	2	0	0	0	0	2	0
BM787	166750135	166807848	57713	2	2	2	2	2	2	0	2	0	2	2	0	2	0	2	2	0	0	2	2	0	2	2	0	2	2	2	2	2	2	2	2	2	2	2	0	2	2	0	2	0	0	0	0	2	0
BM788	166807849	167034243	226394	2	2	2	2	2	2	0	2	0	2	2	0	2	0	2	2	0	0	2	2	0	2	2	0	2	2	2	2	2	2	2	2	2	2	2	0	2	2	0	2	0	0	0	0	2	0
BM789	167034244	167339392	305148	2	2	2	2	2	2	0	2	0	2	2	0	2	0	2	2	0	0	2	2	0	2	2	0	2	2	2	2	2	2	2	2	2	2	2	0	2	2	0	2	0	0	0	0	2	0
BM791	167339393	167760600	421207	2	2	2	2	2	2	0	2	0	2	2	0	2	0	2	2	0	0	2	2	0	2	2	0	2	2	2	2	2	2	2	2	2	2	2	0	2	2	0	2	0	0	0	0	2	0
BM795	167760601	167844136	83535	2	2	2	2	2	2	0	2	0	2	2	0	2	0	2	2	0	0	2	2	0	2	2	0	2	2	2	2	2	2	2	2	2	2	2	0	2	2	0	2	0	0	0	0	2	0
BM794	167844137	167876098	31961	2	2	2	2	2	2	0	2	0	2	2	0	2	0	2	2	0	0	2	2	0	2	2	0	2	2	2	2	2	2	2	2	2	2	2	0	2	2	0	2	0	0	0	0	2	0
BM793	167876099	167987005	110906	2	2	2	2	2	2	0	2	0	2	2	0	2	0	2	2	0	0	2	2	0	2	2	0	2	2	2	2	2	2	2	2	2	2	2	0	2	2	0	2	0	0	0	0	2	0
BM790	167987006	168015120	28114	2	2	2	2	2	2	0	2	0	2	2	0	2	0	2	2	0	0	2	2	0	2	2	0	2	2	2	2	2	2	2	2	2	2	2	0	2	2	0	2	0	0	0	0	2	0
BM792	168015121	168150427	135306	2	2	2	2	2	2	0	2	0	2	2	0	2	0	2	2	0	0	2	2	0	2	2	0	2	2	2	2	2	2	2	2	2	2	2	0	2	2	0	2	0	0	0	0	2	0
BM799	168150428	168518066	367638	2	2	2	2	2	2	0	2	0	2	2	0	2	0	2	2	0	0	2	2	0	2	2	0	2	2	2	2	2	2	2	2	2	2	2	0	2	2	0	2	0	0	0	0	2	0
BM796	168518067	169053156	535089	2	2	2	2	2	2	0	2	0	2	2	0	2	0	2	2	0	0	2	2	0	2	2	0	2	2	2	2	2	2	2	2	2	2	2	0	2	2	0	2	0	0	0	0	2	0
BM798	169053157	169108555	55398	2	2	2	2	2	2	0	2	0	2	2	0	2	0	2	2	0	0	2	2	0	2	2	0	2	2	2	2	2	2	2	2	2	2	2	0	2	2	0	2	0	0	0	0	2	0
BM800	169108556	169349295	240739	2	2	2	2	2	2	0	2	0	2	2	0	2	0	2	2	0	0	2	2	0	2	2	0	2	2	2	2	2	2	2	2	2	2	2	0	2	2	0	2	0	0	0	0	2	0
BM797	169349296	169539860	190564	2	2	2	2	2	2	0	2	0	2	2	0	2	0	2	2	0	0	2	2	0	2	2	0	2	2	2	2	2	2	2	2	2	2	2	0	2	2	0	2	0	0	0	0	2	0
BM801	169539861	169760604	220743	2	2	2	2	2	2	0	2	0	2	2	0	2	0	2	2	0	0	2	2	0	2	2	0	2	2	2	2	2	2	2	2	2	2	2	0	2	2	0	2	0	0	0	0	2	0
BM805	169760605	169983818	223213	2	2	2	2	2	2	0	2	0	2	2	0	2	0	2	2	0	0	2	2	0	2	2	0	2	2	2	2	2	2	2	2	2	2	2	0	2	2	0	2	0	0	0	0	2	0
BM806	169983819	170023033	39214	2	2	2	2	2	2	0	2	0	2	2	0	2	0	2	2	0	0	2	2	0	2	2	0	2	2	2	2	2	2	2	2	2	2	2	0	2	2	0	2	0	0	0	0	2	0
BM808	170023034	170349970	326936	2	2	2	2	2	2	0	2	0	2	2	0	2	0	2	2	0	0	2	2	0	2	2	0	2	2	2	2	2	2	2	2	2	2	2	0	2	2	0	2	0	0	0	0	2	0
BM802	170349971	170605682	255711	2	2	2	2	2	2	0	2	0	2	2	0	2	0	2	2	0	0	2	2	0	2	2	0	2	2	2	2	2	2	2	2	2	2	2	0	2	2	0	2	0	0	0	0	2	0
BM807	170605683	170611907	6224	2	2	2	2	2	2	0	2	0	2	2	0	2	0	2	2	0	0	2	2	0	2	2	0	2	2	2	2	2	2	2	2	2	2	2	0	2	2	0	2	0	0	0	0	2	0
BM803	170611908	170668014	56106	2	2	2	2	2	2	0	2	0	2	2	0	2	0	2	2	0	0	2	2	0	2	2	0	2	2	2	2	2	2	2	2	2	2	2	0	2	2	0	2	0	0	0	0	2	0
BM804	170668015	171277071	609056	2	2	2	2	2	2	0	2	0	2	2	0	2	0	2	2	0	0	2	2	0	2	2	0	2	2	2	2	2	2	2	2	2	2	2	0	2	2	0	2	0	0	0	0	2	0
BM809	171277072	171398948	121876	2	2	2	2	2	2	0	2	0	2	2	0	2	0	2	2	0	0	2	2	0	2	2	0	2	2	2	2	2	2	2	2	2	2	2	0	2	2	0	2	0	0	0	0	2	0
BM814	171398949	171468395	69446	2	2	2	2	2	2	0	2	0	2	2	0	2	0	2	2	0	0	2	2	0	2	2	0	2	2	2	2	2	2	2	2	2	2	2	0	2	2	0	2	0	0	0	0	2	0
BM813	171468396	171550411	82015	2	2	2	2	2	2	0	2	0	2	2	0	2	0	2	2	0	0	2	2	0	2	2	0	2	2	2	2	2	2	2	2	2	2	2	0	2	2	0	2	0	0	0	0	2	0
BM816	171550412	171591329	40917	2	2	2	2	2	2	0	2	0	2	2	0	2	0	2	2	0	0	2	2	0	2	2	0	2	2	2	2	2	2	2	2	2	2	2	0	2	2	0	2	0	0	0	0	2	0
BM815	171591330	171658020	66690	2	2	2	2	2	2	0	2	0	2	2	0	2	0	2	2	0	0	2	2	0	2	2	0	2	2	2	2	2	2	2	2	2	2	2	0	2	2	0	2	0	0	0	0	2	0
BM817	171658021	171804693	146672	2	2	2	2	2	2	0	2	0	2	2	0	2	0	2	2	0	0	2	2	0	2	2	0	2	2	2	2	2	2	2	2	2	2	2	0	2	2	0	2	0	0	0	0	2	0
BM812	171804694	172190404	385710	2	2	2	2	2	2	0	2	0	2	2	0	2	0	2	2	0	0	2	2	0	2	2	0	2	2	2	2	2	2	2	2	2	2	2	0	2	2	0	2	0	0	0	0	2	0
BM811	172190405	172294461	104056	2	2	2	2	2	2	0	2	0	2	2	0	2	0	2	2	0	0	2	2	0	2	2	0	2	2	2	2	2	2	2	2	2	2	2	0	2	2	0	2	0	0	0	0	2	0
BM810	172294462	172453547	159085	2	2	2	2	2	2	0	2	0	2	2	0	2	0	2	2	0	0	2	2	0	2	2	0	2	2	2	2	2	2	2	2	2	2	2	0	2	2	0	2	0	0	0	0	2	0
BM822	172453548	172493471	39923	2	2	2	2	2	2	0	2	0	2	2	0	2	0	2	2	0	0	2	2	0	2	2	0	2	2	2	2	2	2	2	2	2	2	2	0	2	2	0	2	0	0	0	0	2	0
BM821	172493472	173816773	1323301	2	2	2	2	2	2	0	2	0	2	2	0	2	0	2	2	0	0	2	2	0	2	2	0	2	2	2	2	2	2	2	2	2	2	2	0	2	2	0	2	0	0	0	0	2	0
BM818	173816774	173841458	24684	2	2	2	2	2	2	0	2	0	2	2	0	2	0	2	2	0	0	2	2	0	2	2	0	2	2	2	2	2	2	2	2	2	2	2	0	2	2	0	2	0	0	0	0	2	0
BM819	173841459	173890014	48555	2	2	2	2	2	2	0	2	0	2	2	0	2	0	2	2	0	0	2	2	0	2	2	0	2	2	2	2	2	2	2	2	2	2	2	0	2	2	0	2	0	0	0	0	2	0
BM823	173890015	173970665	80650	2	2	2	2	2	2	0	2	0	2	2	0	2	0	2	2	0	0	2	2	0	2	2	0	2	2	2	2	2	2	2	2	2	2	2	0	2	2	0	2	0	0	0	0	2	0
[truncated: 10,908 more rows]
[truncated: 126 more columns]
