# Supplementary material
Source: Research Square preprint supplement (doi:10.21203/rs.3.rs-8751068/v1)
Supplement: Supplementary file 1 [file c760554712c17c9b230bcaf4.docx]

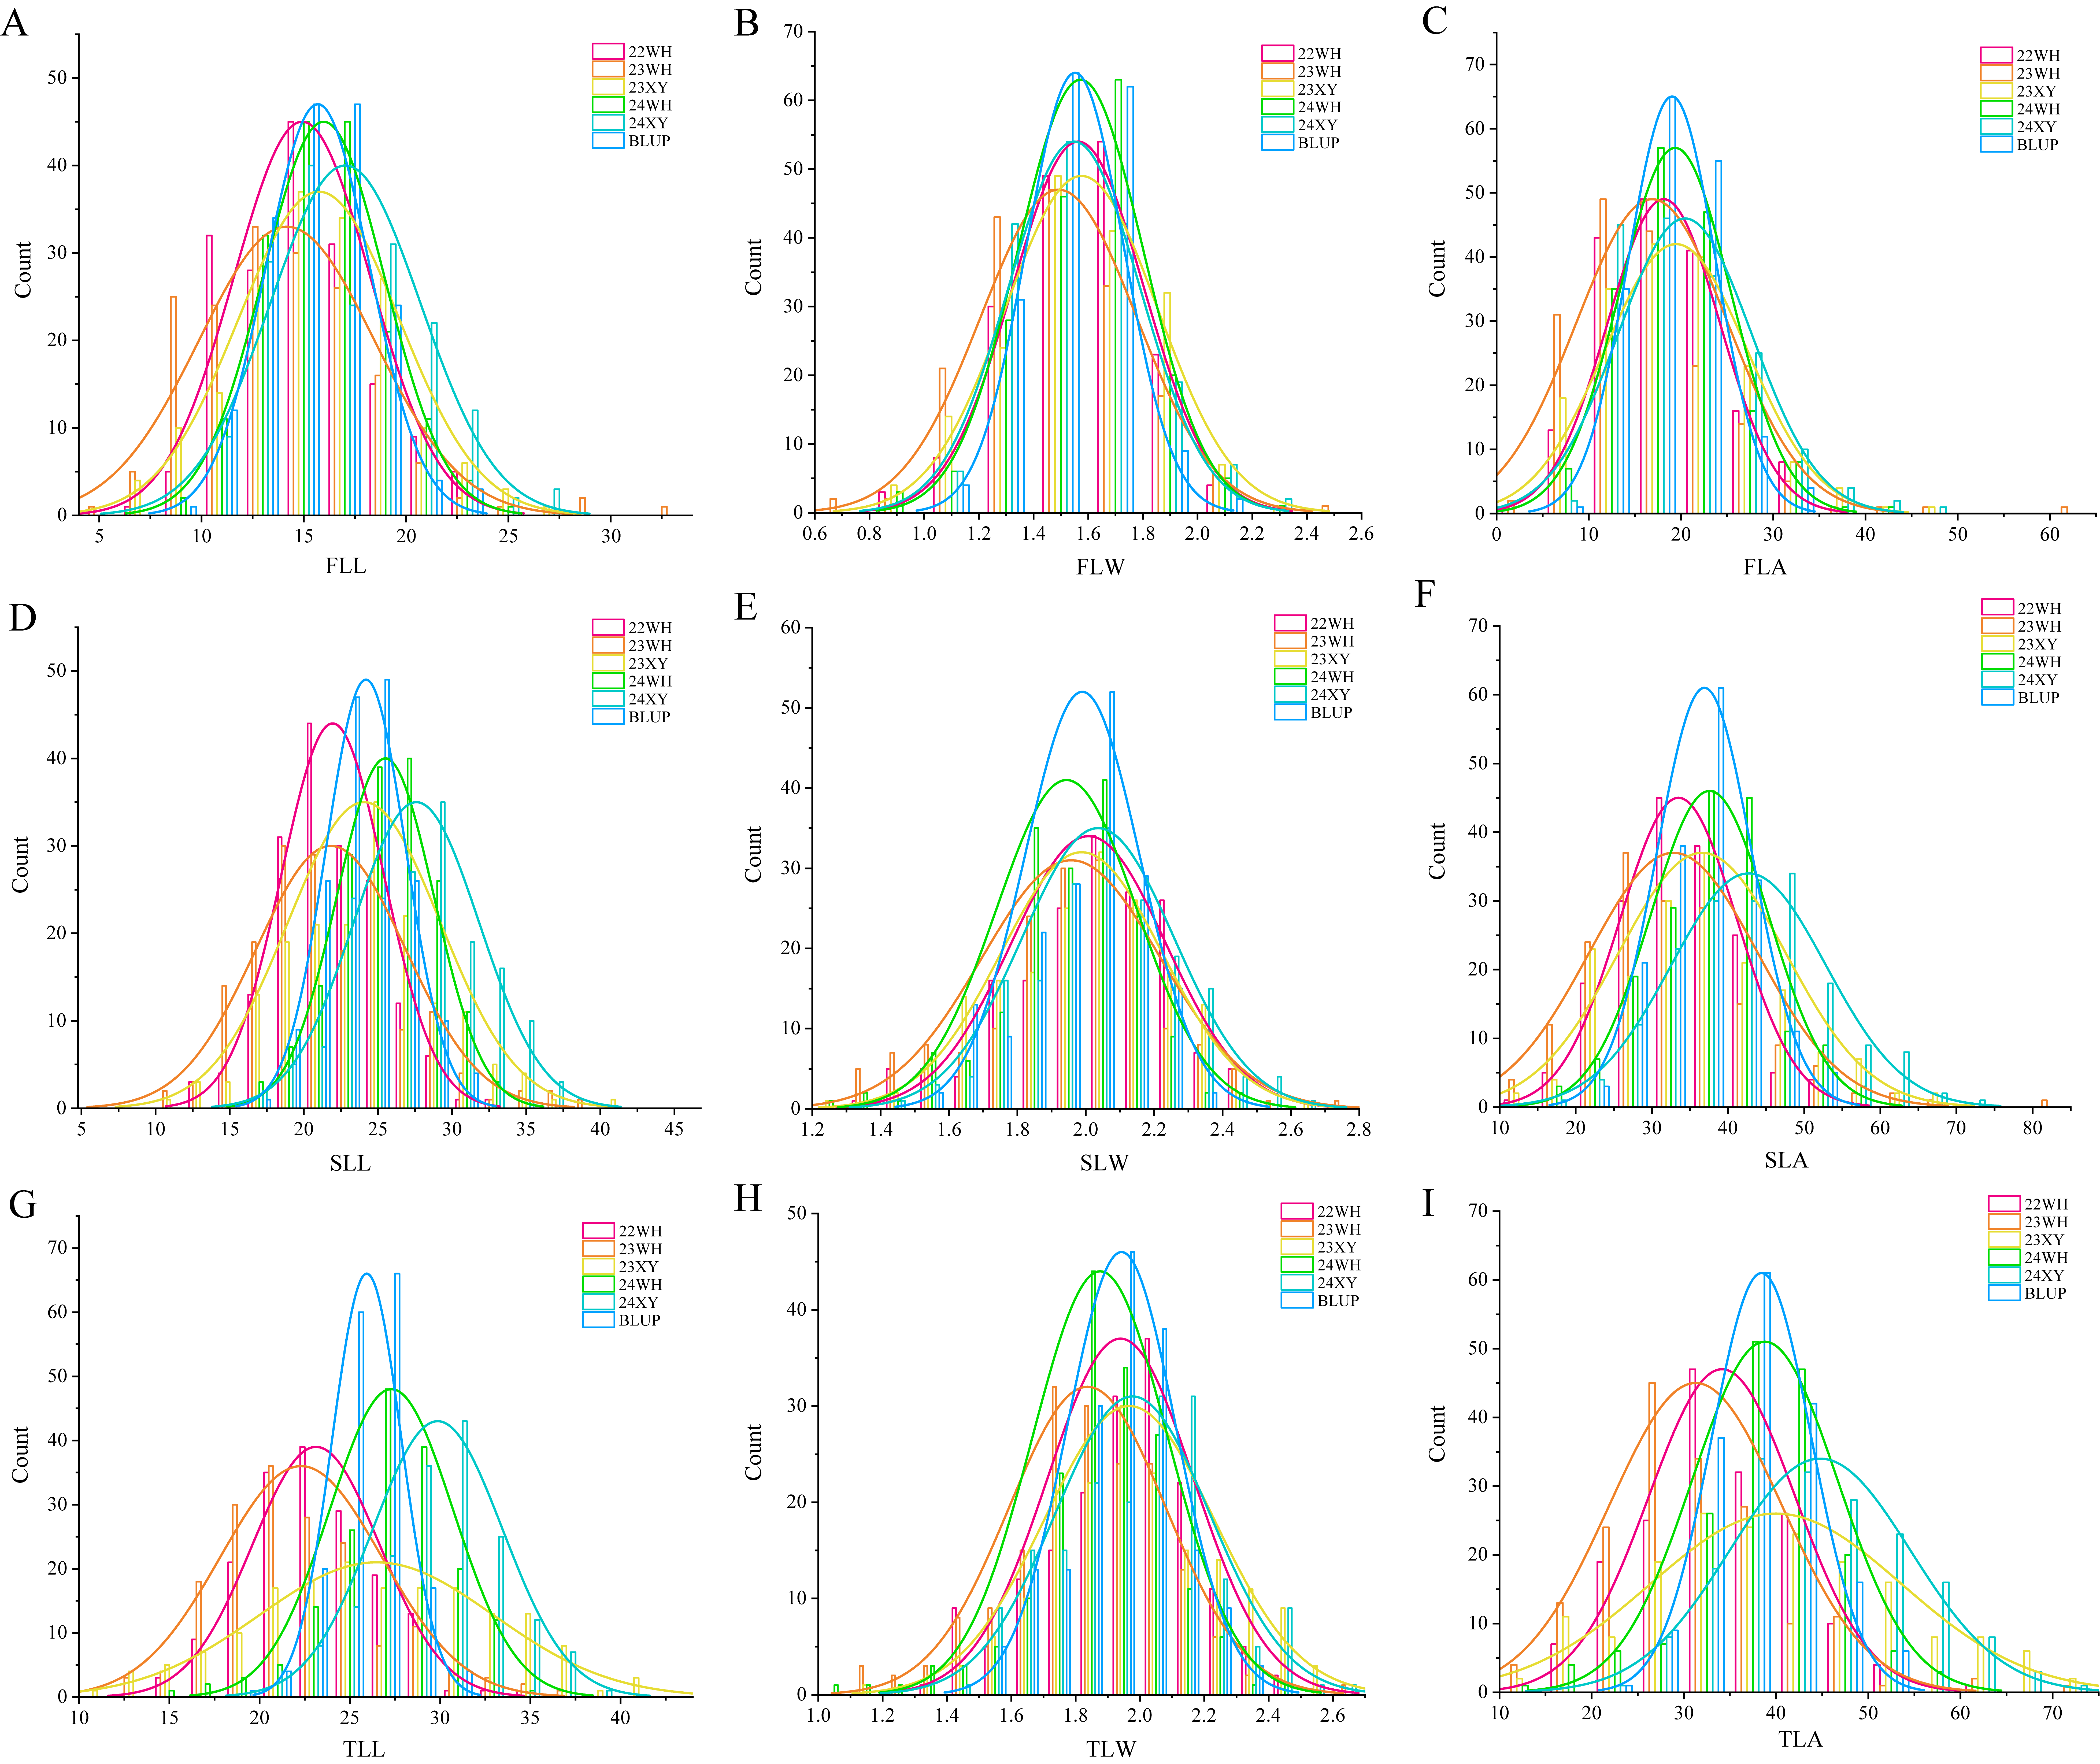


Figure S1.Normal distribution of leaf size related traits in RIL population under natural cultivation environment and BLUP.

A-C. Normal distribution of length, width and area of population flag leaves; D-F. Normal distribution of length, width and area of the second leaf of a population; G-I. Normal distribution of length, width and area of the third leaf of population
