# Supplementary material
Source: Research Square preprint supplement (doi:10.21203/rs.3.rs-8751068/v1)
Supplement: Supplementary file 2 [file 6ac1b4406d7bc9bdc6e08b9f.xlsx]

## Sheet: Table S1
Table S1. Sample sequencing depth and coverage statistics
Sample	Total base（G）			Mapping rate（%）	Q20（%）	Q30（%）	GC content （%）	Average depth（×）
YJ	71.8		99.81		97.51	92.86	44.4	16.81×
H30	61.24		99.81		97.16	91.82	44.38	14.24×
Offspring average	32.5		99.81		97.36	92.38	44.11	7.63×

## Sheet: Table S2
Table S2. Comparison of gene locations labeled with Bin markers and their physical positions.
Marker	Chromosome	Genetic_cM	Physical_bp	Genetic_norm	Physical_norm
AM1	1H	0	664299	0	0
AM2	1H	0.6098	708151	0.00422702	8.5022e-05
AM3	1H	0.6098	1129385	0.00422702	0.000901727
AM4	1H	0.6098	1750678	0.00422702	0.00210631
AM5	1H	0.9092	2112740	0.0063024	0.00280829
AM6	1H	1.5116	2177005	0.0104781	0.00293289
AM7	1H	1.8147	2273380	0.0125792	0.00311975
AM8	1H	1.8147	2310664	0.0125792	0.00319204
AM10	1H	2.1195	2782715	0.014692	0.00410727
AM11	1H	2.1195	2841292	0.014692	0.00422084
AM12	1H	2.1195	3019451	0.014692	0.00456626
AM13	1H	2.1195	3368545	0.014692	0.0052431
AM14	1H	2.1195	3582970	0.014692	0.00565883
AM15	1H	2.1195	4927820	0.014692	0.00826628
AM9	1H	2.1195	2386622	0.014692	0.00333931
AM16	1H	3.6632	5144377	0.0253926	0.00868615
AM17	1H	4.2693	5380989	0.029594	0.00914491
AM18	1H	4.5705	5395838	0.0316818	0.0091737
AM19	1H	4.5705	5404822	0.0316818	0.00919111
AM20	1H	4.8699	5553140	0.0337572	0.00947868
AM21	1H	4.8699	7779358	0.0337572	0.013795
AM22	1H	4.8699	8345123	0.0337572	0.0148919
AM23	1H	12.9823	8372264	0.0899908	0.0149445
AM24	1H	12.9823	8968281	0.0899908	0.0161001
AM25	1H	12.9823	9586313	0.0899908	0.0172984
AM26	1H	12.9823	10483390	0.0899908	0.0190376
AM27	1H	14.2021	10522091	0.0984462	0.0191127
AM28	1H	14.8045	10531498	0.102622	0.0191309
AM29	1H	18.3135	10568867	0.126946	0.0192034
AM30	1H	18.6111	10821141	0.129009	0.0196925
AM31	1H	18.9087	10849379	0.131071	0.0197472
AM32	1H	18.9087	10875907	0.131071	0.0197987
AM33	1H	19.2046	11084890	0.133123	0.0202039
AM34	1H	19.2046	11246750	0.133123	0.0205177
AM35	1H	19.2046	11469002	0.133123	0.0209486
AM36	1H	19.2046	11499107	0.133123	0.021007
AM37	1H	19.2046	11520164	0.133123	0.0210478
AM38	1H	19.5058	11629145	0.13521	0.0212591
AM39	1H	19.807	11639241	0.137298	0.0212787
AM40	1H	20.7217	11809730	0.143639	0.0216092
AM41	1H	20.7217	11891371	0.143639	0.0217675
AM42	1H	21.0211	12111458	0.145714	0.0221942
AM43	1H	21.0211	13197155	0.145714	0.0242992
AM44	1H	21.3205	13232928	0.14779	0.0243686
AM45	1H	21.6199	13341972	0.149865	0.02458
AM46	1H	21.6199	13373338	0.149865	0.0246408
AM47	1H	22.2188	13449321	0.154016	0.0247881
AM48	1H	22.8176	14143315	0.158167	0.0261336
AM49	1H	23.1152	14492591	0.16023	0.0268108
AM50	1H	23.1152	14613645	0.16023	0.0270455
AM51	1H	23.1152	14724513	0.16023	0.0272605
AM52	1H	24.0244	14738899	0.166533	0.0272884
AM53	1H	24.322	14788535	0.168595	0.0273846
AM54	1H	24.6197	15082645	0.170659	0.0279549
AM55	1H	24.6197	15210666	0.170659	0.0282031
AM56	1H	24.9155	15256436	0.172709	0.0282918
AM57	1H	24.9155	15333051	0.172709	0.0284404
AM58	1H	24.9155	15455112	0.172709	0.028677
AM59	1H	25.2149	15486304	0.174785	0.0287375
AM60	1H	25.2149	15710922	0.174785	0.029173
AM61	1H	25.8137	15757532	0.178936	0.0292634
AM62	1H	26.4126	15861781	0.183087	0.0294655
AM63	1H	26.4126	16173077	0.183087	0.030069
AM64	1H	26.4126	16603492	0.183087	0.0309035
AM65	1H	27.0114	16789914	0.187238	0.031265
AM66	1H	27.0114	16863203	0.187238	0.0314071
AM67	1H	27.3108	17165885	0.189313	0.0319939
AM68	1H	27.3108	17493566	0.189313	0.0326292
AM69	1H	27.3108	17510378	0.189313	0.0326618
AM70	1H	27.6102	19612104	0.191389	0.0367368
AM71	1H	27.9096	19696790	0.193464	0.0369009
AM72	1H	27.9096	19836858	0.193464	0.0371725
AM73	1H	28.5157	19847760	0.197665	0.0371937
AM74	1H	28.8169	19893181	0.199753	0.0372817
AM75	1H	28.8169	20137558	0.199753	0.0377555
AM76	1H	29.7261	20154111	0.206056	0.0377876
AM77	1H	30.0255	20422836	0.208131	0.0383086
AM78	1H	30.0255	20541203	0.208131	0.0385381
AM79	1H	30.3267	20553736	0.210219	0.0385624
AM80	1H	30.6279	20604954	0.212307	0.0386617
AM81	1H	30.6279	20615024	0.212307	0.0386813
AM82	1H	30.9255	20661486	0.21437	0.0387713
AM83	1H	31.2232	20671186	0.216433	0.0387901
AM84	1H	31.5208	20690686	0.218496	0.038828
AM85	1H	31.8202	20722777	0.220572	0.0388902
AM86	1H	32.1196	20873133	0.222647	0.0391817
AM87	1H	32.4172	20933311	0.22471	0.0392984
AM88	1H	33.016	20939224	0.228861	0.0393098
AM89	1H	33.3137	20959389	0.230924	0.0393489
AM90	1H	33.6113	20969462	0.232987	0.0393685
AM91	1H	33.9089	21055641	0.23505	0.0395355
AM92	1H	34.2065	21367019	0.237113	0.0401393
AM93	1H	34.2065	21579448	0.237113	0.0405511
AM94	1H	34.2065	21613806	0.237113	0.0406177
AM95	1H	34.2065	22093962	0.237113	0.0415487
AM96	1H	34.8126	22130964	0.241314	0.0416204
AM97	1H	35.112	22374753	0.24339	0.0420931
AM98	1H	35.112	22442406	0.24339	0.0422243
AM99	1H	35.4114	22453415	0.245465	0.0422456
AM100	1H	35.7108	22482224	0.24754	0.0423015
AM101	1H	36.0102	22705580	0.249616	0.0427345
AM102	1H	36.0102	22710667	0.249616	0.0427444
AM104	1H	36.6238	22817967	0.253869	0.0429524
AM105	1H	36.6238	23468407	0.253869	0.0442135
AM103	1H	36.9268	22812234	0.25597	0.0429413
AM106	1H	36.9268	23992463	0.25597	0.0452296
AM107	1H	36.9268	24262839	0.25597	0.0457538
AM108	1H	36.9268	24278798	0.25597	0.0457847
AM109	1H	37.228	24300545	0.258057	0.0458269
AM110	1H	37.8341	24393385	0.262259	0.0460069
AM111	1H	38.1353	24448343	0.264347	0.0461134
AM112	1H	38.4365	24639233	0.266434	0.0464836
AM113	1H	38.7377	24665489	0.268522	0.0465345
AM114	1H	39.039	24810100	0.270611	0.0468148
AM115	1H	39.039	24912357	0.270611	0.0470131
AM116	1H	39.039	25071642	0.270611	0.0473219
AM117	1H	39.342	25176342	0.272711	0.0475249
AM118	1H	39.342	25463997	0.272711	0.0480826
AM119	1H	39.342	25502824	0.272711	0.0481579
AM120	1H	39.342	25580381	0.272711	0.0483083
AM121	1H	39.6414	25674985	0.274787	0.0484917
AM122	1H	39.6414	25778114	0.274787	0.0486917
AM123	1H	39.6414	25832026	0.274787	0.0487962
AM124	1H	39.6414	25895196	0.274787	0.0489187
AM125	1H	39.6414	26212732	0.274787	0.0495343
AM126	1H	39.9444	26301848	0.276887	0.0497071
AM127	1H	39.9444	26390553	0.276887	0.0498791
AM128	1H	39.9444	26533019	0.276887	0.0501553
AM129	1H	39.9444	26590229	0.276887	0.0502662
AM130	1H	39.9444	26694483	0.276887	0.0504684
AM131	1H	39.9444	26769250	0.276887	0.0506133
AM132	1H	39.9444	26787392	0.276887	0.0506485
AM133	1H	39.9444	26856115	0.276887	0.0507817
AM134	1H	39.9444	27628137	0.276887	0.0522786
AM135	1H	39.9444	28231285	0.276887	0.053448
AM136	1H	39.9444	28617647	0.276887	0.0541971
AM137	1H	39.9444	28712593	0.276887	0.0543811
AM138	1H	39.9444	28930215	0.276887	0.0548031
AM139	1H	40.2475	29160041	0.278988	0.0552487
AM140	1H	40.2475	29264550	0.278988	0.0554513
AM141	1H	40.2475	29273098	0.278988	0.0554679
AM142	1H	40.8572	29887244	0.283214	0.0566586
AM143	1H	40.8572	29982064	0.283214	0.0568424
AM144	1H	41.4633	30412446	0.287416	0.0576769
AM145	1H	41.7645	30441888	0.289504	0.057734
AM146	1H	42.0658	31014776	0.291592	0.0588447
AM147	1H	42.0658	31033661	0.291592	0.0588813
AM148	1H	42.0658	31087315	0.291592	0.0589853
AM149	1H	42.0658	31192344	0.291592	0.059189
AM150	1H	42.0658	31273850	0.291592	0.059347
AM151	1H	42.0658	31301034	0.291592	0.0593997
AM152	1H	42.0658	31468009	0.291592	0.0597235
AM153	1H	42.0658	31475382	0.291592	0.0597377
AM154	1H	42.0658	31520583	0.291592	0.0598254
AM155	1H	42.0658	31618097	0.291592	0.0600144
AM156	1H	42.0658	31644958	0.291592	0.0600665
AM157	1H	42.0658	32253144	0.291592	0.0612457
AM158	1H	42.367	32380918	0.29368	0.0614934
AM159	1H	42.367	32499836	0.29368	0.061724
AM160	1H	42.6682	32512183	0.295768	0.0617479
AM161	1H	42.6682	32546589	0.295768	0.0618146
AM162	1H	42.9712	32700901	0.297868	0.0621138
AM163	1H	43.2743	32707375	0.299969	0.0621264
AM164	1H	43.884	32720080	0.304195	0.062151
AM165	1H	43.884	32773702	0.304195	0.062255
AM166	1H	43.884	33016328	0.304195	0.0627254
AM167	1H	43.884	33267880	0.304195	0.0632131
AM168	1H	43.884	33439644	0.304195	0.0635461
AM169	1H	43.884	34792001	0.304195	0.0661681
AM170	1H	43.884	34954529	0.304195	0.0664833
AM171	1H	43.884	35336334	0.304195	0.0672235
AM172	1H	43.884	35769127	0.304195	0.0680626
AM173	1H	43.884	36382435	0.304195	0.0692517
AM174	1H	43.884	36996069	0.304195	0.0704415
AM175	1H	43.884	37054129	0.304195	0.070554
AM176	1H	44.1889	37292664	0.306309	0.0710165
AM177	1H	44.4938	37377501	0.308422	0.071181
AM178	1H	44.7987	37554158	0.310536	0.0715235
AM179	1H	45.1036	37571580	0.31265	0.0715573
AM180	1H	45.4084	40199684	0.314762	0.0766528
AM181	1H	45.7133	40297960	0.316876	0.0768433
AM182	1H	45.7133	41649479	0.316876	0.0794637
AM183	1H	46.0164	42696190	0.318977	0.0814931
AM184	1H	46.3194	42853994	0.321077	0.0817991
AM185	1H	46.3194	43027432	0.321077	0.0821353
AM186	1H	46.3194	43056796	0.321077	0.0821923
AM187	1H	46.3194	43069354	0.321077	0.0822166
AM188	1H	46.3194	43882823	0.321077	0.0837938
AM189	1H	46.3194	44007016	0.321077	0.0840346
AM190	1H	46.3194	44502275	0.321077	0.0849948
AM191	1H	46.3194	44725631	0.321077	0.0854279
AM192	1H	46.3194	44799644	0.321077	0.0855714
AM193	1H	46.3194	44964557	0.321077	0.0858911
AM194	1H	46.3194	45297552	0.321077	0.0865367
AM195	1H	46.6206	45307938	0.323165	0.0865569
AM196	1H	46.9218	45474515	0.325253	0.0868798
AM197	1H	46.9218	45720065	0.325253	0.0873559
AM198	1H	46.9218	46025567	0.325253	0.0879482
AM199	1H	46.9218	46262968	0.325253	0.0884085
AM200	1H	46.9218	46499035	0.325253	0.0888662
AM201	1H	46.9218	46507149	0.325253	0.0888819
AM202	1H	46.9218	46606228	0.325253	0.089074
AM203	1H	46.9218	46643761	0.325253	0.0891468
AM204	1H	46.9218	46708708	0.325253	0.0892727
AM205	1H	46.9218	46821180	0.325253	0.0894908
AM206	1H	46.9218	46967045	0.325253	0.0897736
AM207	1H	46.9218	47056406	0.325253	0.0899469
AM208	1H	46.9218	47362003	0.325253	0.0905394
AM209	1H	46.9218	47400243	0.325253	0.0906135
AM210	1H	46.9218	47656610	0.325253	0.0911106
AM211	1H	46.9218	47804478	0.325253	0.0913972
AM212	1H	46.9218	47918091	0.325253	0.0916175
AM213	1H	46.9218	48094625	0.325253	0.0919598
AM214	1H	46.9218	48441916	0.325253	0.0926331
AM215	1H	46.9218	49268469	0.325253	0.0942357
AM216	1H	46.9218	49371499	0.325253	0.0944354
AM217	1H	46.9218	49403337	0.325253	0.0944972
AM218	1H	46.9218	49760574	0.325253	0.0951898
AM219	1H	46.9218	49777000	0.325253	0.0952216
AM220	1H	46.9218	50056628	0.325253	0.0957638
AM221	1H	46.9218	50086370	0.325253	0.0958215
AM222	1H	46.9218	50701805	0.325253	0.0970147
AM223	1H	46.9218	50859038	0.325253	0.0973195
AM224	1H	46.9218	51682771	0.325253	0.0989166
AM225	1H	46.9218	52117669	0.325253	0.0997598
AM226	1H	46.9218	52635931	0.325253	0.100765
AM227	1H	46.9218	52663663	0.325253	0.100818
AM228	1H	46.9218	52934041	0.325253	0.101343
AM229	1H	46.9218	53021536	0.325253	0.101512
AM230	1H	46.9218	53422371	0.325253	0.102289
AM231	1H	46.9218	53522214	0.325253	0.102483
AM232	1H	46.9218	54191442	0.325253	0.103781
AM233	1H	46.9218	54355802	0.325253	0.104099
AM234	1H	46.9218	54438368	0.325253	0.104259
AM235	1H	46.9218	54735023	0.325253	0.104834
AM236	1H	46.9218	54958961	0.325253	0.105269
AM237	1H	46.9218	55233317	0.325253	0.105801
AM238	1H	46.9218	55390002	0.325253	0.106104
AM239	1H	46.9218	55413168	0.325253	0.106149
AM240	1H	47.2248	55468838	0.327353	0.106257
AM241	1H	47.2248	55993051	0.327353	0.107274
AM242	1H	47.2248	56233043	0.327353	0.107739
AM243	1H	47.2248	56272741	0.327353	0.107816
AM244	1H	47.2248	56340244	0.327353	0.107947
AM245	1H	47.2248	56452480	0.327353	0.108164
AM246	1H	47.2248	56474880	0.327353	0.108208
AM247	1H	47.2248	56539438	0.327353	0.108333
AM248	1H	47.2248	57501029	0.327353	0.110197
AM249	1H	47.8346	57729949	0.33158	0.110641
AM250	1H	48.1377	57744783	0.333681	0.11067
AM251	1H	48.1377	57989647	0.333681	0.111145
AM252	1H	48.1377	58116926	0.333681	0.111391
AM253	1H	48.1377	58135095	0.333681	0.111427
AM254	1H	48.1377	58212410	0.333681	0.111577
AM255	1H	48.1377	59334882	0.333681	0.113753
AM256	1H	48.4426	60272290	0.335795	0.11557
AM257	1H	48.7474	61105478	0.337908	0.117186
AM258	1H	48.7474	61224341	0.337908	0.117416
AM259	1H	48.7474	68881818	0.337908	0.132263
AM260	1H	48.7474	69550720	0.337908	0.13356
AM261	1H	48.7474	70497733	0.337908	0.135396
AM262	1H	48.7474	70655024	0.337908	0.135701
AM263	1H	48.7474	70922379	0.337908	0.136219
AM264	1H	48.7474	71267753	0.337908	0.136889
AM265	1H	48.7474	71362167	0.337908	0.137072
AM266	1H	48.7474	71469968	0.337908	0.137281
AM267	1H	48.7474	71768261	0.337908	0.137859
AM268	1H	49.3647	71878738	0.342187	0.138073
AM269	1H	49.3647	72016766	0.342187	0.138341
AM270	1H	49.3647	72766793	0.342187	0.139795
AM271	1H	49.6696	72818524	0.3443	0.139895
AM272	1H	49.9745	72959874	0.346414	0.14017
AM273	1H	49.9745	75217341	0.346414	0.144546
AM274	1H	49.9745	75532019	0.346414	0.145157
AM275	1H	49.9745	75658903	0.346414	0.145403
AM276	1H	49.9745	75823914	0.346414	0.145722
AM277	1H	49.9745	75931102	0.346414	0.14593
AM278	1H	49.9745	75996870	0.346414	0.146058
AM279	1H	49.9745	76193529	0.346414	0.146439
AM280	1H	49.9745	76251858	0.346414	0.146552
AM281	1H	49.9745	76312453	0.346414	0.14667
AM282	1H	49.9745	76329640	0.346414	0.146703
AM283	1H	49.9745	76837871	0.346414	0.147688
AM284	1H	49.9745	77196295	0.346414	0.148383
AM285	1H	49.9745	77219389	0.346414	0.148428
AM286	1H	49.9745	77268825	0.346414	0.148524
AM287	1H	49.9745	79013592	0.346414	0.151907
AM288	1H	49.9745	79083730	0.346414	0.152043
AM289	1H	49.9745	82350666	0.346414	0.158377
AM290	1H	49.9745	82495931	0.346414	0.158658
AM291	1H	50.2721	82593942	0.348477	0.158848
AM292	1H	50.2721	83595572	0.348477	0.16079
AM293	1H	50.5715	85972427	0.350552	0.165399
AM294	1H	50.5715	88285329	0.350552	0.169883
AM295	1H	50.5715	93873677	0.350552	0.180718
AM296	1H	50.5715	96251995	0.350552	0.185329
AM297	1H	50.5715	99485741	0.350552	0.191599
AM298	1H	50.8746	121821937	0.352653	0.234905
AM299	1H	50.8746	123244041	0.352653	0.237662
AM300	1H	50.8746	128196152	0.352653	0.247264
AM301	1H	50.8746	130969681	0.352653	0.252641
AM302	1H	50.8746	138323402	0.352653	0.266899
AM303	1H	50.8746	140567405	0.352653	0.27125
AM304	1H	50.8746	166663914	0.352653	0.321847
AM305	1H	50.8746	168559459	0.352653	0.325522
AM306	1H	50.8746	181673718	0.352653	0.350948
AM307	1H	50.8746	185245724	0.352653	0.357874
AM308	1H	50.8746	192475941	0.352653	0.371892
AM309	1H	50.8746	197155459	0.352653	0.380965
AM310	1H	50.8746	200052354	0.352653	0.386581
AM311	1H	50.8746	201293140	0.352653	0.388987
AM312	1H	50.8746	222881139	0.352653	0.430843
AM313	1H	50.8746	224810182	0.352653	0.434583
AM314	1H	50.8746	231610276	0.352653	0.447767
AM315	1H	50.8746	236480508	0.352653	0.45721
AM316	1H	50.8746	238947271	0.352653	0.461992
AM317	1H	50.8746	240292890	0.352653	0.464601
AM318	1H	50.8746	243090681	0.352653	0.470026
AM319	1H	50.8746	244492444	0.352653	0.472744
AM320	1H	50.8746	255542591	0.352653	0.494168
AM321	1H	50.8746	257067666	0.352653	0.497125
AM322	1H	50.8746	257189766	0.352653	0.497362
AM323	1H	50.8746	257993049	0.352653	0.498919
AM324	1H	50.8746	258347914	0.352653	0.499607
AM325	1H	50.8746	258641270	0.352653	0.500176
AM326	1H	50.8746	259699736	0.352653	0.502228
AM327	1H	50.8746	259838440	0.352653	0.502497
AM328	1H	50.8746	263921954	0.352653	0.510414
AM329	1H	50.8746	264604606	0.352653	0.511738
AM330	1H	50.8746	264823046	0.352653	0.512161
AM331	1H	50.8746	265940777	0.352653	0.514329
AM332	1H	50.8746	266528331	0.352653	0.515468
AM333	1H	50.8746	266639172	0.352653	0.515683
AM334	1H	50.8746	266787607	0.352653	0.51597
AM335	1H	50.8746	268273952	0.352653	0.518852
AM336	1H	50.8746	268431176	0.352653	0.519157
AM337	1H	50.8746	268787926	0.352653	0.519849
AM338	1H	50.8746	268804108	0.352653	0.51988
AM339	1H	50.8746	268951597	0.352653	0.520166
AM340	1H	50.8746	269031654	0.352653	0.520321
AM341	1H	50.8746	269138512	0.352653	0.520528
AM342	1H	50.8746	269204343	0.352653	0.520656
AM343	1H	50.8746	269244585	0.352653	0.520734
AM344	1H	50.8746	269589760	0.352653	0.521403
AM345	1H	50.8746	269649370	0.352653	0.521519
AM346	1H	50.8746	269962964	0.352653	0.522127
AM347	1H	50.8746	270498639	0.352653	0.523166
AM348	1H	50.8746	270656856	0.352653	0.523472
AM349	1H	50.8746	270852167	0.352653	0.523851
AM350	1H	50.8746	270872601	0.352653	0.523891
AM351	1H	50.8746	270923788	0.352653	0.52399
AM352	1H	50.8746	271764008	0.352653	0.525619
AM353	1H	50.8746	272070238	0.352653	0.526213
AM354	1H	50.8746	272254667	0.352653	0.52657
AM355	1H	50.8746	272303777	0.352653	0.526665
AM356	1H	50.8746	272452329	0.352653	0.526953
AM357	1H	50.8746	272571714	0.352653	0.527185
AM358	1H	50.8746	272724438	0.352653	0.527481
AM359	1H	50.8746	280668156	0.352653	0.542883
AM360	1H	50.8746	281459743	0.352653	0.544417
AM361	1H	50.8746	283349498	0.352653	0.548081
AM362	1H	50.8746	283430438	0.352653	0.548238
AM363	1H	50.8746	289130479	0.352653	0.55929
AM364	1H	50.8746	291571359	0.352653	0.564022
AM365	1H	50.8746	294507295	0.352653	0.569714
AM366	1H	50.8746	299079192	0.352653	0.578579
AM367	1H	50.8746	304940991	0.352653	0.589944
AM368	1H	50.8746	304990810	0.352653	0.59004
AM369	1H	50.8746	305157400	0.352653	0.590363
AM370	1H	50.8746	305254090	0.352653	0.590551
AM371	1H	50.8746	305524836	0.352653	0.591076
AM372	1H	50.8746	305599012	0.352653	0.591219
AM373	1H	50.8746	305757274	0.352653	0.591526
AM374	1H	50.8746	305883187	0.352653	0.59177
AM375	1H	50.8746	306013481	0.352653	0.592023
AM376	1H	50.8746	306211491	0.352653	0.592407
AM377	1H	50.8746	306415161	0.352653	0.592802
AM378	1H	50.8746	307957323	0.352653	0.595792
AM379	1H	50.8746	308199223	0.352653	0.596261
AM380	1H	50.8746	308312463	0.352653	0.59648
AM381	1H	50.8746	308570655	0.352653	0.596981
AM382	1H	50.8746	309013868	0.352653	0.59784
AM383	1H	50.8746	309228513	0.352653	0.598257
AM384	1H	50.8746	309325227	0.352653	0.598444
AM385	1H	50.8746	309560061	0.352653	0.598899
AM386	1H	50.8746	309755255	0.352653	0.599278
AM387	1H	50.8746	310476395	0.352653	0.600676
AM388	1H	50.8746	310863073	0.352653	0.601426
AM389	1H	50.8746	310994752	0.352653	0.601681
AM390	1H	50.8746	311107758	0.352653	0.6019
AM391	1H	50.8746	311124363	0.352653	0.601932
AM392	1H	50.8746	311310997	0.352653	0.602294
AM393	1H	50.8746	311547226	0.352653	0.602752
AM394	1H	50.8746	311887088	0.352653	0.603411
AM395	1H	50.8746	311993490	0.352653	0.603617
AM396	1H	50.8746	312091385	0.352653	0.603807
AM397	1H	50.8746	312718892	0.352653	0.605024
AM398	1H	50.8746	312947323	0.352653	0.605467
AM399	1H	50.8746	313014070	0.352653	0.605596
AM400	1H	50.8746	313168313	0.352653	0.605895
AM401	1H	50.8746	313479228	0.352653	0.606498
AM402	1H	50.8746	313674940	0.352653	0.606877
AM403	1H	50.8746	315527055	0.352653	0.610468
AM404	1H	50.8746	315829490	0.352653	0.611055
AM405	1H	50.8746	315889447	0.352653	0.611171
AM406	1H	50.8746	315998215	0.352653	0.611382
AM407	1H	50.8746	316034345	0.352653	0.611452
AM408	1H	50.8746	316078033	0.352653	0.611537
AM409	1H	50.8746	316320506	0.352653	0.612007
AM410	1H	50.8746	316744671	0.352653	0.612829
AM411	1H	50.8746	317796252	0.352653	0.614868
AM412	1H	50.8746	318011205	0.352653	0.615285
AM413	1H	50.8746	318040287	0.352653	0.615341
AM414	1H	50.8746	318117361	0.352653	0.615491
AM415	1H	50.8746	318491366	0.352653	0.616216
AM416	1H	50.8746	318620062	0.352653	0.616465
AM417	1H	50.8746	318983381	0.352653	0.61717
AM418	1H	50.8746	319229530	0.352653	0.617647
AM419	1H	50.8746	320190633	0.352653	0.61951
AM420	1H	50.8746	320352580	0.352653	0.619824
AM421	1H	50.8746	320548953	0.352653	0.620205
AM422	1H	50.8746	320720848	0.352653	0.620538
AM423	1H	50.8746	320890999	0.352653	0.620868
AM424	1H	50.8746	321015472	0.352653	0.62111
AM425	1H	50.8746	321338651	0.352653	0.621736
AM426	1H	50.8746	321443179	0.352653	0.621939
AM427	1H	50.8746	321943704	0.352653	0.622909
AM428	1H	50.8746	321951910	0.352653	0.622925
AM429	1H	50.8746	322027216	0.352653	0.623071
AM430	1H	50.8746	322061006	0.352653	0.623137
AM431	1H	50.8746	322445606	0.352653	0.623882
AM432	1H	50.8746	322606176	0.352653	0.624194
AM433	1H	50.8746	322667426	0.352653	0.624312
AM434	1H	50.8746	322749097	0.352653	0.624471
AM435	1H	50.8746	322856000	0.352653	0.624678
AM436	1H	50.8746	322989181	0.352653	0.624936
AM437	1H	50.8746	323079967	0.352653	0.625112
AM438	1H	50.8746	323124667	0.352653	0.625199
AM439	1H	50.8746	323206160	0.352653	0.625357
AM440	1H	50.8746	323222010	0.352653	0.625388
AM441	1H	50.8746	323315265	0.352653	0.625568
AM442	1H	50.8746	323339431	0.352653	0.625615
AM443	1H	50.8746	324179661	0.352653	0.627244
AM444	1H	50.8746	324514881	0.352653	0.627894
AM445	1H	50.8746	325041479	0.352653	0.628915
AM446	1H	50.8746	325156431	0.352653	0.629138
AM447	1H	50.8746	325253489	0.352653	0.629326
AM448	1H	50.8746	325539687	0.352653	0.629881
AM449	1H	50.8746	325663092	0.352653	0.630121
AM450	1H	50.8746	325713355	0.352653	0.630218
AM451	1H	50.8746	325767577	0.352653	0.630323
AM452	1H	50.8746	325855613	0.352653	0.630494
AM453	1H	50.8746	325924461	0.352653	0.630627
AM454	1H	50.8746	325988726	0.352653	0.630752
AM455	1H	50.8746	327374597	0.352653	0.633439
AM456	1H	50.8746	327517727	0.352653	0.633716
AM457	1H	50.8746	327767856	0.352653	0.634201
AM458	1H	50.8746	328741000	0.352653	0.636088
AM459	1H	50.8746	329267976	0.352653	0.63711
AM460	1H	50.8746	329326807	0.352653	0.637224
AM461	1H	50.8746	329738834	0.352653	0.638023
AM462	1H	50.8746	329933198	0.352653	0.6384
AM463	1H	50.8746	330387055	0.352653	0.63928
AM464	1H	50.8746	330576803	0.352653	0.639647
AM465	1H	50.8746	330778200	0.352653	0.640038
AM466	1H	50.8746	330791249	0.352653	0.640063
AM467	1H	50.8746	330942013	0.352653	0.640356
AM468	1H	50.8746	331018352	0.352653	0.640504
AM469	1H	50.8746	331119957	0.352653	0.640701
AM470	1H	50.8746	331445832	0.352653	0.641332
AM471	1H	50.8746	331993922	0.352653	0.642395
AM472	1H	50.8746	334557123	0.352653	0.647365
AM473	1H	50.8746	341871597	0.352653	0.661546
AM474	1H	50.8746	342513274	0.352653	0.66279
AM475	1H	50.8746	342610961	0.352653	0.66298
AM476	1H	50.8746	342676943	0.352653	0.663108
AM477	1H	50.8746	344331592	0.352653	0.666316
AM478	1H	51.1758	344509714	0.354741	0.666661
AM479	1H	51.1758	344593292	0.354741	0.666823
AM480	1H	51.1758	344650188	0.354741	0.666933
AM481	1H	51.1758	344744411	0.354741	0.667116
AM482	1H	51.1758	344827084	0.354741	0.667276
AM483	1H	51.4807	344934733	0.356854	0.667485
AM484	1H	51.4807	345324095	0.356854	0.66824
AM485	1H	51.4807	346306651	0.356854	0.670145
AM486	1H	51.4807	346387164	0.356854	0.670301
AM487	1H	51.4807	346530662	0.356854	0.670579
AM488	1H	51.4807	346816976	0.356854	0.671135
AM489	1H	51.4807	346965696	0.356854	0.671423
AM490	1H	51.7837	347572358	0.358955	0.672599
AM491	1H	51.7837	347741312	0.358955	0.672927
AM492	1H	51.7837	348066868	0.358955	0.673558
AM493	1H	51.7837	348784642	0.358955	0.67495
AM494	1H	51.7837	348819037	0.358955	0.675016
AM495	1H	52.0867	349070854	0.361055	0.675504
AM496	1H	52.0867	349155448	0.361055	0.675668
AM497	1H	52.0867	349312912	0.361055	0.675974
AM498	1H	52.0867	349421523	0.361055	0.676184
AM499	1H	52.3879	349782852	0.363143	0.676885
AM500	1H	52.3879	349817311	0.363143	0.676952
AM501	1H	52.3879	349828571	0.363143	0.676974
AM502	1H	52.3879	350118341	0.363143	0.677535
AM503	1H	52.3879	350287187	0.363143	0.677863
AM504	1H	52.3879	350826366	0.363143	0.678908
AM505	1H	52.3879	350935060	0.363143	0.679119
AM506	1H	52.3879	351184887	0.363143	0.679603
AM507	1H	52.3879	351347391	0.363143	0.679918
AM508	1H	52.3879	352525871	0.363143	0.682203
AM509	1H	52.3879	353424254	0.363143	0.683945
AM510	1H	52.3879	354186597	0.363143	0.685423
AM511	1H	52.3879	354872609	0.363143	0.686753
AM512	1H	52.3879	355105843	0.363143	0.687205
AM513	1H	52.3879	355250799	0.363143	0.687486
AM514	1H	52.3879	355784516	0.363143	0.688521
AM515	1H	52.3879	356571340	0.363143	0.690047
AM516	1H	52.3879	356812726	0.363143	0.690515
AM517	1H	52.3879	357024938	0.363143	0.690926
AM518	1H	52.3879	357430587	0.363143	0.691713
AM519	1H	52.691	360876427	0.365244	0.698394
AM520	1H	52.691	360962067	0.365244	0.69856
AM521	1H	52.691	361389249	0.365244	0.699388
AM522	1H	52.691	361851934	0.365244	0.700285
AM523	1H	52.691	361947078	0.365244	0.700469
AM524	1H	52.691	363297037	0.365244	0.703087
AM525	1H	52.691	363436933	0.365244	0.703358
AM526	1H	52.691	364018765	0.365244	0.704486
AM527	1H	52.691	364174677	0.365244	0.704788
AM528	1H	52.691	364808849	0.365244	0.706018
AM529	1H	52.691	365062795	0.365244	0.70651
AM530	1H	52.691	365226238	0.365244	0.706827
AM531	1H	52.691	365433978	0.365244	0.70723
AM532	1H	52.691	365650088	0.365244	0.707649
AM533	1H	52.691	366248253	0.365244	0.708809
AM534	1H	52.691	366391128	0.365244	0.709086
AM535	1H	52.691	366704531	0.365244	0.709693
AM536	1H	52.691	366877689	0.365244	0.710029
AM537	1H	52.691	366933628	0.365244	0.710137
AM538	1H	52.691	366997852	0.365244	0.710262
AM539	1H	52.691	367417198	0.365244	0.711075
AM540	1H	52.691	367605950	0.365244	0.711441
AM541	1H	52.691	368001189	0.365244	0.712207
AM542	1H	52.691	368088752	0.365244	0.712377
AM543	1H	52.691	368430569	0.365244	0.71304
AM544	1H	52.691	368551723	0.365244	0.713275
AM545	1H	52.691	368765777	0.365244	0.71369
AM546	1H	52.691	368863475	0.365244	0.713879
AM547	1H	52.9977	369177147	0.36737	0.714487
AM548	1H	52.9977	369438675	0.36737	0.714994
AM549	1H	52.9977	369535985	0.36737	0.715183
AM550	1H	52.9977	369679847	0.36737	0.715462
AM551	1H	52.9977	369714114	0.36737	0.715528
AM552	1H	52.9977	369720063	0.36737	0.71554
AM553	1H	52.9977	369791506	0.36737	0.715678
AM554	1H	52.9977	370136908	0.36737	0.716348
AM555	1H	52.9977	370163933	0.36737	0.716401
AM556	1H	52.9977	370444933	0.36737	0.716945
AM558	1H	52.9977	370701680	0.36737	0.717443
AM559	1H	52.9977	370769578	0.36737	0.717575
AM560	1H	52.9977	370980059	0.36737	0.717983
AM557	1H	53.3026	370480546	0.369483	0.717014
AM561	1H	53.3026	372387443	0.369483	0.720712
AM562	1H	53.3026	372512366	0.369483	0.720954
AM563	1H	53.3026	372598888	0.369483	0.721122
AM564	1H	53.3026	373906332	0.369483	0.723656
AM565	1H	53.3026	374014531	0.369483	0.723866
AM566	1H	53.3026	374818863	0.369483	0.725426
AM567	1H	53.3026	375317957	0.369483	0.726393
AM568	1H	53.3026	376928038	0.369483	0.729515
AM569	1H	53.6056	378474193	0.371584	0.732513
AM570	1H	53.6056	378809644	0.371584	0.733163
AM571	1H	53.9068	379220481	0.373672	0.73396
AM572	1H	53.9068	381117494	0.373672	0.737638
AM573	1H	55.1417	381126077	0.382232	0.737654
AM574	1H	55.1417	381248973	0.382232	0.737893
AM575	1H	55.1417	381409634	0.382232	0.738204
AM576	1H	55.1417	381715610	0.382232	0.738797
AM577	1H	55.4447	381757067	0.384332	0.738878
AM578	1H	55.4447	382133615	0.384332	0.739608
AM579	1H	55.4447	382812619	0.384332	0.740924
AM580	1H	55.4447	383330139	0.384332	0.741928
AM581	1H	55.4447	383388485	0.384332	0.742041
AM582	1H	55.7496	383396525	0.386446	0.742056
AM583	1H	56.3631	383423588	0.390698	0.742109
AM584	1H	56.9766	383772537	0.394951	0.742785
AM585	1H	56.9766	383818578	0.394951	0.742875
AM586	1H	56.9766	384382913	0.394951	0.743969
AM587	1H	56.9766	385364559	0.394951	0.745872
AM588	1H	56.9766	385493088	0.394951	0.746121
AM589	1H	56.9766	385643336	0.394951	0.746413
AM590	1H	56.9766	385781811	0.394951	0.746681
AM591	1H	56.9766	385960376	0.394951	0.747027
AM592	1H	56.9766	385971161	0.394951	0.747048
AM593	1H	56.9766	386026850	0.394951	0.747156
AM594	1H	56.9766	386043461	0.394951	0.747188
AM595	1H	56.9766	386189992	0.394951	0.747472
AM596	1H	56.9766	386475831	0.394951	0.748027
AM597	1H	56.9766	386514406	0.394951	0.748101
AM598	1H	56.9766	386634112	0.394951	0.748334
AM599	1H	56.9766	387008925	0.394951	0.74906
AM600	1H	56.9766	387286162	0.394951	0.749598
AM601	1H	57.5864	387340032	0.399178	0.749702
AM602	1H	57.5864	387826640	0.399178	0.750646
AM603	1H	57.5864	387936509	0.399178	0.750859
AM604	1H	57.8932	388077823	0.401305	0.751133
AM605	1H	57.8932	388216936	0.401305	0.751402
AM606	1H	57.8932	388324482	0.401305	0.751611
AM607	1H	57.8932	388872391	0.401305	0.752673
AM608	1H	57.8932	391131721	0.401305	0.757054
AM609	1H	58.5105	391256421	0.405584	0.757295
AM610	1H	58.5105	391574620	0.405584	0.757912
AM611	1H	58.5105	391657036	0.405584	0.758072
AM612	1H	58.5105	391852357	0.405584	0.758451
AM613	1H	58.5105	391891174	0.405584	0.758526
AM614	1H	58.5105	391905888	0.405584	0.758555
AM615	1H	58.5105	392031308	0.405584	0.758798
AM616	1H	58.5105	392106320	0.405584	0.758943
AM617	1H	58.5105	392270408	0.405584	0.759261
AM618	1H	58.5105	393113075	0.405584	0.760895
AM619	1H	58.5105	393226158	0.405584	0.761114
AM620	1H	58.5105	393380289	0.405584	0.761413
AM621	1H	58.5105	393594800	0.405584	0.761829
AM622	1H	58.5105	394011841	0.405584	0.762638
AM623	1H	58.5105	394019051	0.405584	0.762652
AM624	1H	58.5105	394212300	0.405584	0.763026
AM625	1H	59.124	394347657	0.409836	0.763289
AM626	1H	59.124	394413389	0.409836	0.763416
AM627	1H	59.124	394570247	0.409836	0.76372
AM628	1H	59.4327	394610678	0.411976	0.763799
AM629	1H	59.4327	395868646	0.411976	0.766238
AM630	1H	59.4327	395973767	0.411976	0.766442
AM631	1H	59.4327	396519401	0.411976	0.7675
AM632	1H	59.4327	396596178	0.411976	0.767648
AM633	1H	59.4327	396651594	0.411976	0.767756
AM634	1H	59.4327	396875486	0.411976	0.76819
AM635	1H	59.4327	397093588	0.411976	0.768613
AM636	1H	59.4327	397250848	0.411976	0.768918
AM637	1H	59.4327	397327348	0.411976	0.769066
AM638	1H	59.7375	397494081	0.414089	0.769389
AM639	1H	59.7375	397506026	0.414089	0.769412
AM640	1H	59.7375	397680777	0.414089	0.769751
AM641	1H	59.7375	397690394	0.414089	0.76977
AM642	1H	59.7375	397928910	0.414089	0.770232
AM643	1H	59.7375	398824865	0.414089	0.771969
AM644	1H	60.3473	402464605	0.418316	0.779026
AM645	1H	60.3473	402853077	0.418316	0.77978
AM646	1H	60.6522	402858760	0.420429	0.779791
AM647	1H	60.9571	402865083	0.422543	0.779803
AM648	1H	61.262	403077768	0.424656	0.780215
AM649	1H	61.8793	403140008	0.428935	0.780336
AM650	1H	61.8793	403272309	0.428935	0.780592
AM651	1H	61.8793	403462153	0.428935	0.78096
AM652	1H	61.8793	403527202	0.428935	0.781087
AM653	1H	61.8793	403618977	0.428935	0.781264
AM654	1H	61.8793	403677785	0.428935	0.781379
AM655	1H	61.8793	403968569	0.428935	0.781942
AM656	1H	61.8793	404223476	0.428935	0.782437
AM657	1H	61.8793	404276850	0.428935	0.78254
AM658	1H	61.8793	404323569	0.428935	0.782631
AM659	1H	61.8793	404982902	0.428935	0.783909
AM660	1H	61.8793	405376829	0.428935	0.784673
AM661	1H	61.8793	405589894	0.428935	0.785086
AM662	1H	61.8793	405964904	0.428935	0.785813
AM663	1H	61.8793	405972861	0.428935	0.785828
AM664	1H	61.8793	406053011	0.428935	0.785984
AM665	1H	61.8793	406104222	0.428935	0.786083
AM666	1H	61.8793	406257609	0.428935	0.78638
AM667	1H	61.8793	406276503	0.428935	0.786417
AM668	1H	61.8793	406310245	0.428935	0.786482
AM669	1H	61.8793	406340684	0.428935	0.786541
AM670	1H	61.8793	406568461	0.428935	0.786983
AM671	1H	61.8793	406599757	0.428935	0.787044
AM672	1H	61.8793	407377498	0.428935	0.788552
AM673	1H	62.1823	407408398	0.431036	0.788612
AM674	1H	62.1823	407501434	0.431036	0.788792
AM675	1H	62.1823	407799274	0.431036	0.789369
AM676	1H	62.1823	408025383	0.431036	0.789808
AM677	1H	62.1823	408095214	0.431036	0.789943
AM678	1H	62.1823	408440643	0.431036	0.790613
AM679	1H	62.1823	408642544	0.431036	0.791004
AM680	1H	62.1823	408774406	0.431036	0.79126
AM681	1H	62.4872	409060255	0.433149	0.791814
AM682	1H	62.4872	410253862	0.433149	0.794128
AM683	1H	62.4872	410488796	0.433149	0.794584
AM684	1H	62.4872	414872130	0.433149	0.803083
AM685	1H	62.4872	414877945	0.433149	0.803094
AM686	1H	62.4872	415088588	0.433149	0.803502
AM687	1H	62.4872	415197470	0.433149	0.803713
AM688	1H	62.4872	415226081	0.433149	0.803769
AM689	1H	62.4872	415281109	0.433149	0.803875
AM690	1H	62.4872	415382827	0.433149	0.804073
AM691	1H	62.4872	415821571	0.433149	0.804923
AM692	1H	62.4872	415906331	0.433149	0.805088
AM693	1H	62.794	416089614	0.435276	0.805443
AM694	1H	62.794	416163487	0.435276	0.805586
AM695	1H	62.794	416206384	0.435276	0.805669
AM696	1H	62.794	416246682	0.435276	0.805748
AM697	1H	63.0988	416312754	0.437389	0.805876
AM698	1H	63.0988	416542401	0.437389	0.806321
AM699	1H	63.0988	416722638	0.437389	0.80667
AM700	1H	63.7124	416977084	0.441642	0.807164
AM701	1H	63.7124	417492382	0.441642	0.808163
AM702	1H	64.0154	418017432	0.443742	0.809181
AM703	1H	64.3184	418059894	0.445843	0.809263
AM704	1H	64.6233	418139363	0.447956	0.809417
AM705	1H	64.6233	418247896	0.447956	0.809628
AM706	1H	64.6233	418324296	0.447956	0.809776
AM707	1H	64.6233	418488429	0.447956	0.810094
AM708	1H	64.6233	418621705	0.447956	0.810352
AM709	1H	64.6233	418992827	0.447956	0.811072
AM710	1H	64.6233	419173175	0.447956	0.811422
AM711	1H	65.2331	419481004	0.452183	0.812018
AM712	1H	65.2331	420359767	0.452183	0.813722
AM713	1H	65.2331	420848044	0.452183	0.814669
AM714	1H	65.2331	421356339	0.452183	0.815654
AM715	1H	65.8429	421603785	0.45641	0.816134
AM716	1H	65.8429	421968131	0.45641	0.816841
AM717	1H	66.1459	422037309	0.458511	0.816975
AM718	1H	66.1459	422305076	0.458511	0.817494
AM719	1H	66.4471	422370414	0.460599	0.817621
AM720	1H	66.7483	422662267	0.462686	0.818186
AM721	1H	67.0532	423793085	0.4648	0.820379
AM722	1H	67.0532	423897622	0.4648	0.820582
AM723	1H	67.0532	424377110	0.4648	0.821511
AM724	1H	67.3544	424412525	0.466888	0.82158
AM725	1H	67.9605	425490455	0.471089	0.82367
AM726	1H	69.1878	425625792	0.479597	0.823932
AM727	1H	69.489	425720437	0.481684	0.824116
AM728	1H	69.489	426092624	0.481684	0.824837
AM729	1H	69.489	426249208	0.481684	0.825141
AM730	1H	69.489	426430586	0.481684	0.825493
AM731	1H	69.489	427013114	0.481684	0.826622
AM732	1H	69.489	427315023	0.481684	0.827207
AM733	1H	69.489	427466009	0.481684	0.8275
AM734	1H	69.489	427471188	0.481684	0.82751
AM735	1H	69.489	427548837	0.481684	0.827661
AM736	1H	69.489	427588308	0.481684	0.827737
AM737	1H	69.489	429781358	0.481684	0.831989
AM738	1H	69.489	430639552	0.481684	0.833653
AM739	1H	69.489	430846869	0.481684	0.834055
AM740	1H	69.489	431066726	0.481684	0.834481
AM741	1H	69.489	431093705	0.481684	0.834534
AM742	1H	69.489	431270209	0.481684	0.834876
AM743	1H	69.489	431406471	0.481684	0.83514
AM744	1H	69.7939	431415828	0.483798	0.835158
AM745	1H	69.7939	431442499	0.483798	0.83521
AM746	1H	69.7939	431566848	0.483798	0.835451
AM747	1H	69.7939	431738003	0.483798	0.835783
AM748	1H	69.7939	432080007	0.483798	0.836446
AM749	1H	69.7939	432155972	0.483798	0.836593
AM750	1H	70.0915	432431896	0.485861	0.837128
AM751	1H	70.0915	432437237	0.485861	0.837138
AM752	1H	70.0915	432528424	0.485861	0.837315
AM753	1H	71.0062	432599781	0.492201	0.837454
AM754	1H	71.0062	432758028	0.492201	0.83776
AM755	1H	71.0062	432801322	0.492201	0.837844
AM756	1H	71.0062	432878880	0.492201	0.837995
AM757	1H	71.0062	432927721	0.492201	0.838089
AM758	1H	71.0062	433067936	0.492201	0.838361
AM759	1H	71.0062	433235355	0.492201	0.838686
AM760	1H	71.0062	433470545	0.492201	0.839142
AM761	1H	71.0062	433531307	0.492201	0.83926
AM762	1H	71.0062	433769010	0.492201	0.839721
AM763	1H	71.3038	433819855	0.494264	0.839819
AM764	1H	71.3038	434495657	0.494264	0.841129
AM765	1H	71.3038	434571241	0.494264	0.841276
AM766	1H	71.3038	434747372	0.494264	0.841617
AM767	1H	71.3038	434934717	0.494264	0.841981
AM768	1H	71.3038	435299904	0.494264	0.842689
AM769	1H	71.3038	435472430	0.494264	0.843023
AM770	1H	71.3038	435485993	0.494264	0.84305
AM771	1H	71.3038	435902191	0.494264	0.843856
AM772	1H	71.6015	435911589	0.496328	0.843875
AM773	1H	72.2003	435921029	0.500479	0.843893
AM774	1H	72.4962	436305510	0.50253	0.844638
AM775	1H	72.4962	436348919	0.50253	0.844723
AM776	1H	72.4962	436400540	0.50253	0.844823
AM777	1H	73.0986	436441905	0.506705	0.844903
AM778	1H	73.3962	437904548	0.508768	0.847739
AM779	1H	73.6938	438175834	0.510831	0.848265
AM780	1H	73.6938	438390628	0.510831	0.848681
AM781	1H	73.9897	438963723	0.512882	0.849792
AM782	1H	74.2856	439306019	0.514934	0.850456
AM783	1H	74.2856	441681887	0.514934	0.855062
AM784	1H	75.1893	442178420	0.521198	0.856025
AM785	1H	75.4851	442530347	0.523248	0.856707
AM786	1H	75.781	442558502	0.525299	0.856762
AM787	1H	76.0786	442613395	0.527362	0.856868
AM788	1H	76.3745	443738814	0.529413	0.85905
AM789	1H	76.6703	447052827	0.531464	0.865476
AM790	1H	78.8189	447235034	0.546358	0.865829
AM791	1H	79.1148	447257622	0.548409	0.865873
AM792	1H	79.1148	447576078	0.548409	0.86649
AM793	1H	79.4089	448718199	0.550447	0.868705
AM794	1H	79.703	448767253	0.552486	0.8688
AM795	1H	79.703	448929745	0.552486	0.869115
AM796	1H	79.9954	449515156	0.554513	0.87025
AM797	1H	79.9954	449699262	0.554513	0.870607
AM798	1H	79.9954	449964091	0.554513	0.87112
AM799	1H	79.9954	450076479	0.554513	0.871338
AM800	1H	80.293	450104230	0.556576	0.871392
AM801	1H	80.5906	450754899	0.558639	0.872653
AM802	1H	80.8883	451511248	0.560702	0.87412
AM803	1H	81.1841	451616740	0.562753	0.874324
AM804	1H	81.48	451685314	0.564804	0.874457
AM805	1H	81.7758	451703058	0.566854	0.874492
AM806	1H	82.0717	453143343	0.568905	0.877284
AM807	1H	82.3676	453901551	0.570956	0.878754
AM808	1H	82.6634	454893485	0.573007	0.880678
AM809	1H	83.2587	454996122	0.577133	0.880877
AM810	1H	84.157	455204009	0.58336	0.88128
AM811	1H	84.157	455281830	0.58336	0.88143
AM812	1H	84.7558	455604825	0.587511	0.882057
AM813	1H	84.7558	455638638	0.587511	0.882122
AM814	1H	85.0552	455749108	0.589586	0.882336
AM815	1H	85.3546	455956514	0.591662	0.882739
AM816	1H	85.3546	456140867	0.591662	0.883096
AM817	1H	85.3546	456330805	0.591662	0.883464
AM818	1H	85.3546	457678522	0.591662	0.886077
AM819	1H	85.9571	458158723	0.595838	0.887008
AM820	1H	86.5559	458368735	0.599989	0.887415
AM821	1H	86.5559	460112644	0.599989	0.890797
AM822	1H	86.8553	460380590	0.602064	0.891316
AM823	1H	87.4614	460840909	0.606266	0.892209
AM824	1H	87.4614	461364311	0.606266	0.893223
AM825	1H	87.4614	461375919	0.606266	0.893246
AM826	1H	88.0602	461402274	0.610416	0.893297
AM827	1H	88.3578	461683049	0.612479	0.893841
AM828	1H	89.267	461694410	0.618782	0.893863
AM829	1H	89.267	461855392	0.618782	0.894176
AM830	1H	89.5682	462041635	0.62087	0.894537
AM831	1H	89.5682	462263013	0.62087	0.894966
AM832	1H	89.5682	462313644	0.62087	0.895064
AM833	1H	89.8694	464246461	0.622957	0.898811
AM834	1H	90.1707	465825769	0.625046	0.901873
AM835	1H	91.0854	466221497	0.631387	0.902641
AM836	1H	91.3866	466692421	0.633474	0.903554
AM837	1H	91.6878	466864094	0.635562	0.903887
AM838	1H	92.2939	467130718	0.639764	0.904404
AM839	1H	92.5951	467988533	0.641851	0.906067
AM840	1H	92.5951	468224857	0.641851	0.906525
AM841	1H	93.5154	468971359	0.648231	0.907972
AM842	1H	93.8185	469221977	0.650332	0.908458
AM843	1H	94.1215	469543373	0.652432	0.909081
AM844	1H	94.1215	469644668	0.652432	0.909278
AM845	1H	94.1215	469828320	0.652432	0.909634
AM846	1H	94.1215	469882146	0.652432	0.909738
AM847	1H	94.1215	471180432	0.652432	0.912255
AM848	1H	94.1215	471622212	0.652432	0.913112
AM849	1H	94.1215	471760868	0.652432	0.913381
AM850	1H	94.1215	471817405	0.652432	0.91349
AM851	1H	94.1215	471827821	0.652432	0.91351
AM852	1H	94.1215	471835434	0.652432	0.913525
AM853	1H	94.4227	471902045	0.65452	0.913654
AM854	1H	94.7239	472060313	0.656608	0.913961
AM855	1H	94.7239	472091960	0.656608	0.914023
AM856	1H	94.7239	472109743	0.656608	0.914057
AM857	1H	95.33	473383426	0.660809	0.916527
AM858	1H	95.9361	473397691	0.665011	0.916554
AM859	1H	96.2373	473408065	0.667099	0.916574
AM860	1H	96.2373	473419204	0.667099	0.916596
AM861	1H	96.2373	473572474	0.667099	0.916893
AM862	1H	96.5332	473642622	0.66915	0.917029
AM863	1H	97.1284	473661883	0.673275	0.917066
AM864	1H	97.1284	473716525	0.673275	0.917172
AM865	1H	97.1284	474002870	0.673275	0.917728
AM866	1H	97.1284	474096531	0.673275	0.917909
AM867	1H	97.1284	474384099	0.673275	0.918467
AM868	1H	97.1284	474396725	0.673275	0.918491
AM869	1H	97.1284	474511545	0.673275	0.918714
AM870	1H	97.1284	474762555	0.673275	0.9192
AM871	1H	97.1284	474953038	0.673275	0.91957
AM872	1H	97.1284	475153069	0.673275	0.919958
AM873	1H	97.4333	475266775	0.675389	0.920178
AM874	1H	97.7382	475317823	0.677502	0.920277
AM875	1H	97.7382	475366503	0.677502	0.920371
AM876	1H	97.7382	475384362	0.677502	0.920406
AM877	1H	97.7382	475406559	0.677502	0.920449
AM878	1H	97.7382	475568374	0.677502	0.920763
AM879	1H	97.7382	475648554	0.677502	0.920918
AM880	1H	98.0488	475654637	0.679655	0.92093
AM881	1H	98.0488	476122903	0.679655	0.921838
AM882	1H	98.0488	476228917	0.679655	0.922044
AM883	1H	98.0488	476261707	0.679655	0.922107
AM884	1H	98.0488	476362281	0.679655	0.922302
AM885	1H	98.0488	476480237	0.679655	0.922531
AM886	1H	98.6661	476641911	0.683934	0.922844
AM887	1H	98.6661	476674381	0.683934	0.922907
AM888	1H	98.971	476745617	0.686048	0.923045
AM889	1H	99.2777	476753887	0.688174	0.923061
AM890	1H	99.2777	477357695	0.688174	0.924232
AM891	1H	99.2777	477442506	0.688174	0.924396
AM892	1H	99.2777	477456294	0.688174	0.924423
AM893	1H	99.2777	478258664	0.688174	0.925979
AM894	1H	99.2777	478300503	0.688174	0.92606
AM895	1H	99.2777	478382831	0.688174	0.92622
AM896	1H	99.2777	478481024	0.688174	0.92641
AM897	1H	99.2777	478680853	0.688174	0.926797
AM898	1H	99.2777	478787374	0.688174	0.927004
AM899	1H	99.2777	478917980	0.688174	0.927257
AM900	1H	99.5826	479249040	0.690287	0.927899
AM901	1H	99.5826	479362391	0.690287	0.928119
AM902	1H	99.5826	479603405	0.690287	0.928586
AM903	1H	99.8875	479627561	0.692401	0.928633
AM904	1H	100.192	479644036	0.694515	0.928665
AM905	1H	100.497	479700650	0.696628	0.928775
AM906	1H	100.497	480154541	0.696628	0.929655
AM907	1H	100.497	480178715	0.696628	0.929702
AM908	1H	100.808	480499509	0.69878	0.930324
AM909	1H	100.808	480823042	0.69878	0.930951
AM910	1H	100.808	480996686	0.69878	0.931287
AM911	1H	100.808	481141599	0.69878	0.931568
AM912	1H	100.808	481218852	0.69878	0.931718
AM913	1H	100.808	481229555	0.69878	0.931739
AM914	1H	101.418	481263521	0.703007	0.931805
AM915	1H	101.418	481401497	0.703007	0.932072
AM916	1H	101.719	481529128	0.705095	0.93232
AM917	1H	101.719	481597743	0.705095	0.932453
AM918	1H	101.719	482066741	0.705095	0.933362
AM919	1H	102.022	482072391	0.707196	0.933373
AM920	1H	102.022	482200585	0.707196	0.933622
AM921	1H	102.321	482335581	0.709272	0.933883
AM922	1H	102.924	482380182	0.713447	0.93397
AM923	1H	102.924	482602962	0.713447	0.934402
AM924	1H	102.924	482770501	0.713447	0.934727
AM925	1H	103.53	482894605	0.717649	0.934967
AM926	1H	103.53	483025185	0.717649	0.93522
AM927	1H	103.53	483286206	0.717649	0.935726
AM928	1H	103.53	483468852	0.717649	0.936081
AM929	1H	103.53	483602516	0.717649	0.93634
AM930	1H	103.53	483766165	0.717649	0.936657
AM931	1H	103.53	483840246	0.717649	0.936801
AM932	1H	103.53	483862371	0.717649	0.936844
AM933	1H	103.53	484510693	0.717649	0.938101
AM934	1H	103.53	484564517	0.717649	0.938205
AM935	1H	103.53	484573986	0.717649	0.938223
AM936	1H	103.53	484620803	0.717649	0.938314
AM937	1H	103.53	484833039	0.717649	0.938726
AM938	1H	103.831	484998892	0.719737	0.939047
AM939	1H	103.831	485016240	0.719737	0.939081
AM940	1H	103.831	485058411	0.719737	0.939162
AM941	1H	103.831	485147544	0.719737	0.939335
AM942	1H	104.136	485271446	0.72185	0.939576
AM943	1H	104.136	485381447	0.72185	0.939789
AM944	1H	104.437	485464999	0.723938	0.939951
AM945	1H	104.437	486278846	0.723938	0.941529
AM946	1H	105.047	486587944	0.728165	0.942128
AM947	1H	105.657	486630162	0.732392	0.94221
AM948	1H	105.96	486701338	0.734492	0.942348
AM949	1H	106.263	486764819	0.736593	0.942471
AM950	1H	106.263	486859824	0.736593	0.942655
AM951	1H	107.189	486924279	0.743012	0.94278
AM952	1H	107.189	486996296	0.743012	0.94292
AM953	1H	107.492	487070004	0.745113	0.943063
AM954	1H	109.055	487234689	0.755947	0.943382
AM955	1H	109.055	487513720	0.755947	0.943923
AM956	1H	109.055	487523313	0.755947	0.943942
AM957	1H	109.055	487607387	0.755947	0.944105
AM958	1H	109.36	487705805	0.75806	0.944295
AM959	1H	109.36	487931173	0.75806	0.944732
AM960	1H	109.666	487985537	0.760187	0.944838
AM961	1H	109.973	488224878	0.762313	0.945302
AM962	1H	110.28	488232190	0.76444	0.945316
AM963	1H	110.587	488633463	0.766566	0.946094
AM964	1H	112.16	488994616	0.777469	0.946794
AM965	1H	112.464	489087737	0.779582	0.946975
AM966	1H	112.464	489133180	0.779582	0.947063
AM967	1H	112.464	489171938	0.779582	0.947138
AM968	1H	112.773	489235793	0.781722	0.947262
AM969	1H	113.082	489398077	0.783861	0.947576
AM970	1H	113.39	489691341	0.786001	0.948145
AM971	1H	113.39	489833395	0.786001	0.94842
AM972	1H	114.015	490324971	0.790333	0.949374
AM973	1H	114.64	490347952	0.794665	0.949418
AM974	1H	115.266	490417802	0.798998	0.949553
AM975	1H	115.266	490447337	0.798998	0.949611
AM976	1H	115.266	490470597	0.798998	0.949656
AM977	1H	115.266	490504160	0.798998	0.949721
AM978	1H	115.57	490511769	0.801112	0.949736
AM979	1H	115.875	490742178	0.803225	0.950182
AM980	1H	115.875	490773970	0.803225	0.950244
AM981	1H	116.182	490824147	0.805351	0.950341
AM982	1H	116.489	490966717	0.807478	0.950618
AM983	1H	116.489	491030146	0.807478	0.950741
AM984	1H	116.489	491206403	0.807478	0.951082
AM985	1H	116.489	491218479	0.807478	0.951106
AM986	1H	116.489	491260415	0.807478	0.951187
AM987	1H	116.799	491317687	0.80963	0.951298
AM988	1H	116.799	491379554	0.80963	0.951418
AM989	1H	116.799	491392517	0.80963	0.951443
AM990	1H	116.799	491751354	0.80963	0.952139
AM991	1H	116.799	491769451	0.80963	0.952174
AM992	1H	117.106	491804149	0.811757	0.952241
AM993	1H	117.106	491908701	0.811757	0.952444
AM994	1H	117.411	491914371	0.813871	0.952455
AM995	1H	117.716	491940701	0.815984	0.952506
AM997	1H	117.716	492198859	0.815984	0.953007
AM996	1H	118.021	492038125	0.818097	0.952695
AM1000	1H	118.947	492746672	0.824516	0.954069
AM1001	1H	118.947	493431904	0.824516	0.955397
AM998	1H	118.947	492340434	0.824516	0.953281
AM999	1H	118.947	492702195	0.824516	0.953983
AM1002	1H	120.189	493437366	0.833129	0.955408
AM1003	1H	120.189	493550387	0.833129	0.955627
AM1004	1H	120.189	493631392	0.833129	0.955784
AM1005	1H	120.189	493741750	0.833129	0.955998
AM1006	1H	120.498	493793548	0.835268	0.956099
AM1007	1H	120.805	493870598	0.837395	0.956248
AM1008	1H	120.805	494162349	0.837395	0.956814
AM1009	1H	121.113	494235556	0.839534	0.956955
AM1010	1H	121.113	494305470	0.839534	0.957091
AM1011	1H	121.424	494640271	0.841687	0.95774
AM1012	1H	121.734	494684136	0.84384	0.957825
AM1013	1H	122.045	494842836	0.845993	0.958133
AM1014	1H	122.045	495295915	0.845993	0.959011
AM1015	1H	122.354	495324682	0.848132	0.959067
AM1016	1H	122.975	495364730	0.852438	0.959145
AM1017	1H	122.975	495472246	0.852438	0.959353
AM1018	1H	123.281	495795819	0.854564	0.959981
AM1019	1H	123.281	495855611	0.854564	0.960097
AM1020	1H	123.59	495880585	0.856704	0.960145
AM1021	1H	123.899	495918178	0.858843	0.960218
AM1022	1H	123.899	496009172	0.858843	0.960394
AM1023	1H	124.206	496102423	0.860969	0.960575
AM1024	1H	124.206	496116451	0.860969	0.960602
AM1025	1H	124.514	496185899	0.863109	0.960737
AM1026	1H	124.514	496448707	0.863109	0.961246
AM1027	1H	124.514	496482853	0.863109	0.961313
AM1028	1H	125.132	496505273	0.867388	0.961356
AM1029	1H	125.132	496677292	0.867388	0.96169
AM1030	1H	125.132	496909440	0.867388	0.96214
AM1031	1H	125.436	496968283	0.869501	0.962254
AM1032	1H	125.741	497225573	0.871615	0.962753
AM1033	1H	126.046	497520463	0.873728	0.963324
AM1034	1H	126.046	497637989	0.873728	0.963552
AM1035	1H	126.046	497795923	0.873728	0.963858
AM1036	1H	126.046	497811506	0.873728	0.963889
AM1037	1H	126.353	497881749	0.875855	0.964025
AM1038	1H	126.353	497932132	0.875855	0.964123
AM1039	1H	126.353	498098974	0.875855	0.964446
AM1040	1H	126.656	498362709	0.877955	0.964957
AM1041	1H	126.656	498422103	0.877955	0.965073
AM1042	1H	126.656	498811910	0.877955	0.965828
AM1043	1H	126.656	498999764	0.877955	0.966193
AM1044	1H	126.656	499096883	0.877955	0.966381
AM1045	1H	126.656	499141470	0.877955	0.966467
AM1046	1H	126.967	499166968	0.880108	0.966517
AM1047	1H	126.967	499265041	0.880108	0.966707
AM1048	1H	126.967	499286840	0.880108	0.966749
AM1049	1H	127.281	499314351	0.882287	0.966802
AM1050	1H	127.281	499383221	0.882287	0.966936
AM1051	1H	127.281	499707759	0.882287	0.967565
AM1052	1H	127.281	499879127	0.882287	0.967897
AM1053	1H	127.281	500172964	0.882287	0.968467
AM1054	1H	127.592	500245341	0.884441	0.968608
AM1055	1H	127.592	500455219	0.884441	0.969014
AM1056	1H	127.592	500834001	0.884441	0.969749
AM1057	1H	127.906	500932493	0.886621	0.96994
AM1058	1H	127.906	501143471	0.886621	0.970349
AM1059	1H	128.219	501380716	0.888787	0.970809
AM1060	1H	128.219	501399689	0.888787	0.970846
AM1061	1H	128.219	501557540	0.888787	0.971152
AM1062	1H	128.219	501728106	0.888787	0.971482
AM1063	1H	128.529	501819540	0.890939	0.97166
AM1064	1H	128.529	501844178	0.890939	0.971707
AM1065	1H	128.842	501931909	0.893105	0.971877
AM1066	1H	128.842	502059396	0.893105	0.972125
AM1067	1H	128.842	502141327	0.893105	0.972284
AM1068	1H	128.842	502174456	0.893105	0.972348
AM1069	1H	128.842	502521922	0.893105	0.973021
AM1070	1H	128.842	502543305	0.893105	0.973063
AM1071	1H	128.842	502631538	0.893105	0.973234
AM1072	1H	128.842	502979244	0.893105	0.973908
AM1073	1H	128.842	502989903	0.893105	0.973929
AM1074	1H	128.842	503029783	0.893105	0.974006
AM1075	1H	128.842	503168424	0.893105	0.974275
AM1076	1H	128.842	503188501	0.893105	0.974314
AM1077	1H	128.842	503238040	0.893105	0.97441
AM1078	1H	128.842	503265626	0.893105	0.974463
AM1079	1H	128.842	503322948	0.893105	0.974574
AM1080	1H	128.842	503373590	0.893105	0.974673
AM1081	1H	128.842	503435183	0.893105	0.974792
AM1082	1H	129.467	503530323	0.897438	0.974977
AM1083	1H	129.467	503560353	0.897438	0.975035
AM1084	1H	129.777	503679688	0.899591	0.975266
AM1085	1H	129.777	503703081	0.899591	0.975312
AM1086	1H	130.402	503717489	0.903924	0.975339
AM1087	1H	130.402	503955916	0.903924	0.975802
AM1088	1H	130.402	504406441	0.903924	0.976675
AM1089	1H	130.402	504680063	0.903924	0.977206
AM1090	1H	130.711	504892509	0.906063	0.977618
AM1091	1H	131.332	505144201	0.910369	0.978106
AM1092	1H	131.641	505183236	0.912508	0.978181
AM1093	1H	131.947	505281500	0.914635	0.978372
AM1094	1H	132.254	505311813	0.916761	0.978431
AM1095	1H	132.561	505339567	0.918887	0.978484
AM1096	1H	132.868	505413066	0.921013	0.978627
AM1097	1H	133.485	505456402	0.925292	0.978711
AM1098	1H	133.485	505507632	0.925292	0.97881
AM1099	1H	133.485	506039946	0.925292	0.979842
AM1100	1H	133.485	506185897	0.925292	0.980125
AM1101	1H	133.798	506222323	0.927459	0.980196
AM1102	1H	134.11	506426068	0.929625	0.980591
AM1103	1H	134.11	506462811	0.929625	0.980662
AM1104	1H	134.421	506476364	0.931778	0.980688
AM1105	1H	135.046	506498927	0.93611	0.980732
AM1106	1H	135.356	506518816	0.938263	0.980771
AM1107	1H	135.667	506524433	0.940416	0.980782
AM1108	1H	135.977	506553588	0.942569	0.980838
AM1109	1H	136.288	506654671	0.944722	0.981034
AM1110	1H	136.288	506664728	0.944722	0.981054
AM1111	1H	136.288	506756019	0.944722	0.981231
AM1112	1H	136.602	506774238	0.946901	0.981266
AM1113	1H	136.602	506830068	0.946901	0.981374
AM1114	1H	136.602	506836474	0.946901	0.981387
AM1115	1H	136.602	507035093	0.946901	0.981772
AM1116	1H	136.602	507365123	0.946901	0.982412
AM1117	1H	136.913	507735472	0.949054	0.98313
AM1118	1H	136.913	507747198	0.949054	0.983152
AM1119	1H	136.913	507900381	0.949054	0.983449
AM1120	1H	136.913	508006251	0.949054	0.983655
AM1121	1H	136.913	508065149	0.949054	0.983769
AM1122	1H	137.22	508176864	0.95118	0.983985
AM1123	1H	137.22	508200081	0.95118	0.98403
AM1124	1H	137.528	508227988	0.95332	0.984085
AM1125	1H	137.528	508293668	0.95332	0.984212
AM1126	1H	137.837	508336993	0.955459	0.984296
AM1127	1H	138.146	508357934	0.957599	0.984337
AM1128	1H	138.146	508445335	0.957599	0.984506
AM1129	1H	138.452	508741737	0.959725	0.985081
AM1130	1H	138.757	509238757	0.961838	0.986044
AM1131	1H	139.062	509259162	0.963952	0.986084
AM1132	1H	139.367	509293290	0.966065	0.98615
AM1133	1H	139.984	509801451	0.970344	0.987135
AM1134	1H	140.293	509812893	0.972484	0.987157
AM1135	1H	140.914	510005822	0.97679	0.987532
AM1136	1H	140.914	510013823	0.97679	0.987547
AM1137	1H	140.914	510050342	0.97679	0.987618
AM1138	1H	140.914	510228224	0.97679	0.987963
AM1139	1H	140.914	510296557	0.97679	0.988095
AM1140	1H	140.914	510342876	0.97679	0.988185
AM1141	1H	141.524	510481748	0.981017	0.988454
AM1142	1H	141.827	510491252	0.983118	0.988473
AM1143	1H	142.13	510500436	0.985218	0.98849
AM1144	1H	142.13	511089038	0.985218	0.989632
AM1145	1H	142.13	511633729	0.985218	0.990688
AM1146	1H	142.13	511834686	0.985218	0.991077
AM1147	1H	142.13	511866161	0.985218	0.991138
AM1148	1H	142.74	511926151	0.989445	0.991255
AM1149	1H	142.74	511960076	0.989445	0.99132
AM1150	1H	143.041	512388564	0.991533	0.992151
AM1151	1H	143.956	512556626	0.997873	0.992477
AM1152	1H	143.956	512655410	0.997873	0.992669
AM1153	1H	143.956	512808540	0.997873	0.992966
AM1154	1H	143.956	512849871	0.997873	0.993046
AM1155	1H	143.956	512934796	0.997873	0.99321
AM1156	1H	143.956	513050368	0.997873	0.993434
AM1157	1H	143.956	513217604	0.997873	0.993759
AM1158	1H	143.956	513238136	0.997873	0.993798
AM1159	1H	143.956	513342425	0.997873	0.994001
AM1160	1H	143.956	513363994	0.997873	0.994042
AM1161	1H	143.956	513762256	0.997873	0.994815
AM1162	1H	143.956	513801818	0.997873	0.994891
AM1163	1H	144.262	514251131	1	0.995762
AM1164	1H	144.262	514322336	1	0.995901
AM1165	1H	144.262	514716923	1	0.996666
AM1166	1H	144.262	514750822	1	0.996731
AM1167	1H	144.262	514762732	1	0.996754
AM1168	1H	144.262	514804229	1	0.996835
AM1169	1H	144.262	514830965	1	0.996887
AM1170	1H	144.262	515624425	1	0.998425
AM1171	1H	144.262	515717229	1	0.998605
AM1172	1H	144.262	515788924	1	0.998744
AM1173	1H	144.262	515852405	1	0.998867
AM1174	1H	144.262	516252315	1	0.999642
AM1175	1H	144.262	516436723	1	1
BM3	2H	0	474888	0	0.000364979
BM1	2H	0.3106	232051	0.00176034	0
BM2	2H	0.3106	305978	0.00176034	0.000111111
BM4	2H	0.3106	600463	0.00176034	0.000553716
BM5	2H	0.3106	609861	0.00176034	0.000567841
BM10	2H	0.9356	1646844	0.00530255	0.00212641
BM11	2H	0.9356	1670123	0.00530255	0.00216139
BM12	2H	0.9356	1704448	0.00530255	0.00221298
BM13	2H	0.9356	1766983	0.00530255	0.00230697
BM14	2H	0.9356	1846559	0.00530255	0.00242657
BM15	2H	0.9356	1862028	0.00530255	0.00244982
BM6	2H	0.9356	1363827	0.00530255	0.00170104
BM7	2H	0.9356	1535501	0.00530255	0.00195906
BM8	2H	0.9356	1543832	0.00530255	0.00197158
BM9	2H	0.9356	1552913	0.00530255	0.00198523
BM16	2H	1.5567	1958233	0.00882266	0.00259442
BM17	2H	1.5567	2250093	0.00882266	0.00303308
BM18	2H	1.5567	2290231	0.00882266	0.0030934
BM19	2H	1.5567	2512027	0.00882266	0.00342676
BM20	2H	2.1818	2556489	0.0123654	0.00349359
BM21	2H	2.1818	2848534	0.0123654	0.00393252
BM22	2H	2.1818	2871623	0.0123654	0.00396723
BM23	2H	2.1818	2884829	0.0123654	0.00398707
BM24	2H	2.4943	3194922	0.0141365	0.00445314
BM25	2H	2.8068	3205727	0.0159077	0.00446938
BM26	2H	2.8068	3373082	0.0159077	0.00472091
BM27	2H	2.8068	3580635	0.0159077	0.00503286
BM28	2H	2.8068	3674785	0.0159077	0.00517436
BM29	2H	3.1154	3689380	0.0176567	0.0051963
BM30	2H	3.1154	3755050	0.0176567	0.005295
BM31	2H	3.1154	3829509	0.0176567	0.00540691
BM32	2H	3.1154	3867434	0.0176567	0.00546391
BM33	2H	3.1154	3900496	0.0176567	0.0055136
BM34	2H	3.1154	3927395	0.0176567	0.00555403
BM35	2H	3.1154	3939776	0.0176567	0.00557264
BM36	2H	3.1154	4013086	0.0176567	0.00568282
BM37	2H	3.1154	4212449	0.0176567	0.00598246
BM38	2H	3.1154	4794149	0.0176567	0.00685674
BM39	2H	3.4279	4834537	0.0194278	0.00691745
BM40	2H	3.7404	5155945	0.0211989	0.00740052
BM41	2H	3.7404	5296432	0.0211989	0.00761167
BM42	2H	4.6839	5362840	0.0265462	0.00771148
BM43	2H	4.6839	5379879	0.0265462	0.00773709
BM44	2H	4.6839	5490890	0.0265462	0.00790393
BM45	2H	4.9945	6193055	0.0283065	0.00895927
BM46	2H	4.9945	8890471	0.0283065	0.0130134
BM47	2H	4.9945	8995910	0.0283065	0.0131719
BM48	2H	5.307	9168412	0.0300776	0.0134312
BM49	2H	5.6195	9551949	0.0318487	0.0140076
BM50	2H	5.6195	9646002	0.0318487	0.014149
BM51	2H	5.6195	9706095	0.0318487	0.0142393
BM52	2H	5.6195	10221331	0.0318487	0.0150137
BM53	2H	5.6195	10354212	0.0318487	0.0152134
BM54	2H	5.6195	10532632	0.0318487	0.0154816
BM55	2H	5.6195	10643653	0.0318487	0.0156484
BM56	2H	5.6195	10729236	0.0318487	0.0157771
BM57	2H	6.2446	10794073	0.0353915	0.0158745
BM58	2H	6.5551	10818112	0.0371513	0.0159106
BM59	2H	6.8657	11019966	0.0389116	0.016214
BM60	2H	7.4907	11132137	0.0424538	0.0163826
BM61	2H	7.4907	11569231	0.0424538	0.0170396
BM62	2H	7.8032	11795772	0.0442249	0.01738
BM63	2H	7.8032	12045261	0.0442249	0.017755
BM64	2H	7.8032	12142416	0.0442249	0.017901
BM65	2H	8.1119	12164783	0.0459745	0.0179347
BM66	2H	8.1119	12228838	0.0459745	0.0180309
BM67	2H	8.1119	12241086	0.0459745	0.0180493
BM68	2H	8.4205	12637994	0.0477235	0.0186459
BM69	2H	8.4205	12650223	0.0477235	0.0186643
BM70	2H	8.4205	12791708	0.0477235	0.0188769
BM71	2H	8.4205	12868653	0.0477235	0.0189926
BM72	2H	8.7235	12886448	0.0494408	0.0190193
BM73	2H	8.7235	13026402	0.0494408	0.0192297
BM74	2H	8.7235	13340923	0.0494408	0.0197024
BM75	2H	8.7235	13814287	0.0494408	0.0204138
BM76	2H	9.0248	13939524	0.0511484	0.0206021
BM77	2H	9.326	13950678	0.0528555	0.0206188
BM78	2H	9.326	14687664	0.0528555	0.0217265
BM79	2H	9.629	14736136	0.0545727	0.0217994
BM80	2H	9.932	14992780	0.05629	0.0221851
BM81	2H	10.2351	15361894	0.0580078	0.0227399
BM82	2H	10.2351	15400487	0.0580078	0.0227979
BM83	2H	10.5363	17437414	0.0597149	0.0258593
BM84	2H	10.5363	17794963	0.0597149	0.0263967
BM85	2H	10.8357	17983222	0.0614118	0.0266797
BM86	2H	14.0045	18143593	0.0793711	0.0269207
BM87	2H	14.0045	18151511	0.0793711	0.0269326
BM88	2H	14.6033	18157065	0.0827648	0.0269409
BM89	2H	14.9009	18246888	0.0844514	0.0270759
BM90	2H	15.2003	18260267	0.0861483	0.0270961
BM91	2H	15.4997	18428096	0.0878452	0.0273483
BM92	2H	15.4997	18845701	0.0878452	0.027976
BM93	2H	15.4997	19006904	0.0878452	0.0282182
BM94	2H	15.4997	19020455	0.0878452	0.0282386
BM95	2H	15.4997	19164027	0.0878452	0.0284544
BM96	2H	15.4997	19193071	0.0878452	0.028498
BM97	2H	15.4997	19226689	0.0878452	0.0285486
BM98	2H	15.8046	19260085	0.0895732	0.0285988
BM99	2H	16.1095	19265955	0.0913012	0.0286076
BM100	2H	16.4144	19274516	0.0930293	0.0286205
BM101	2H	16.7193	19300284	0.0947573	0.0286592
BM102	2H	16.7193	19376104	0.0947573	0.0287731
BM103	2H	17.329	19410902	0.0982128	0.0288254
BM104	2H	17.329	19577824	0.0982128	0.0290763
BM105	2H	17.6303	19608967	0.0999204	0.0291231
BM106	2H	17.9297	19836049	0.101617	0.0294644
BM107	2H	17.9297	19877756	0.101617	0.0295271
BM108	2H	18.2309	19954818	0.103324	0.0296429
BM109	2H	18.5321	20026867	0.105031	0.0297512
BM110	2H	18.8333	21034010	0.106738	0.0312649
BM111	2H	18.8333	21146500	0.106738	0.031434
BM112	2H	18.8333	21275419	0.106738	0.0316278
BM113	2H	19.1345	21285590	0.108446	0.0316431
BM114	2H	19.1345	21441247	0.108446	0.031877
BM115	2H	19.1345	21632897	0.108446	0.0321651
BM116	2H	19.1345	21984826	0.108446	0.032694
BM117	2H	19.4375	22011582	0.110163	0.0327342
BM118	2H	19.7406	22017318	0.111881	0.0327428
BM119	2H	20.6609	22225376	0.117096	0.0330555
BM120	2H	20.6609	22237094	0.117096	0.0330732
BM121	2H	20.6609	22280908	0.117096	0.033139
BM122	2H	21.267	22287793	0.120532	0.0331494
BM123	2H	21.267	22686766	0.120532	0.033749
BM124	2H	21.267	22744206	0.120532	0.0338353
BM125	2H	21.267	23320568	0.120532	0.0347016
BM126	2H	21.267	23339658	0.120532	0.0347303
BM127	2H	21.57	23377237	0.122249	0.0347868
BM128	2H	22.1798	23388232	0.125705	0.0348033
BM129	2H	22.4829	23443581	0.127423	0.0348865
BM130	2H	22.4829	23583718	0.127423	0.0350971
BM131	2H	22.7841	23610117	0.12913	0.0351368
BM132	2H	22.7841	24278264	0.12913	0.036141
BM133	2H	22.7841	24612050	0.12913	0.0366427
BM134	2H	22.7841	24729474	0.12913	0.0368191
BM135	2H	22.7841	25031978	0.12913	0.0372738
BM136	2H	23.0871	25081658	0.130847	0.0373485
BM137	2H	23.3901	25167519	0.132564	0.0374775
BM138	2H	23.9999	25225513	0.13602	0.0375647
BM139	2H	23.9999	25268522	0.13602	0.0376293
BM140	2H	24.3011	25465408	0.137727	0.0379252
BM141	2H	24.6023	25620075	0.139435	0.0381577
BM142	2H	24.6023	25655283	0.139435	0.0382106
BM143	2H	24.6023	25688732	0.139435	0.0382609
BM144	2H	24.9	25756844	0.141122	0.0383633
BM145	2H	24.9	25823822	0.141122	0.0384639
BM146	2H	25.1958	25843482	0.142798	0.0384935
BM147	2H	25.1958	25886475	0.142798	0.0385581
BM148	2H	25.1958	25990325	0.142798	0.0387142
BM149	2H	25.4952	26005761	0.144495	0.0387374
BM150	2H	25.7946	26046876	0.146192	0.0387992
BM151	2H	25.7946	26114265	0.146192	0.0389005
BM152	2H	25.7946	26209905	0.146192	0.0390442
BM153	2H	25.7946	26215831	0.146192	0.0390531
BM154	2H	26.0922	26280157	0.147879	0.0391498
BM155	2H	26.6947	26316426	0.151293	0.0392043
BM156	2H	26.9941	26386293	0.15299	0.0393093
BM157	2H	27.2935	26471070	0.154687	0.0394367
BM158	2H	28.5207	27194491	0.161642	0.040524
BM159	2H	28.5207	27309248	0.161642	0.0406965
BM160	2H	28.8238	27316786	0.16336	0.0407078
BM161	2H	29.4335	27730498	0.166816	0.0413296
BM162	2H	29.4335	27987914	0.166816	0.0417165
BM163	2H	29.4335	27993226	0.166816	0.0417245
BM164	2H	29.7403	28070747	0.168554	0.041841
BM165	2H	30.0471	28210707	0.170293	0.0420514
BM166	2H	30.3538	28223404	0.172031	0.0420705
BM167	2H	30.6606	29399121	0.17377	0.0438375
BM168	2H	30.6606	29979429	0.17377	0.0447097
BM169	2H	31.2817	30013348	0.17729	0.0447607
BM170	2H	31.5923	30141480	0.179051	0.0449533
BM171	2H	31.5923	30473056	0.179051	0.0454516
BM172	2H	31.5923	30620744	0.179051	0.0456736
BM173	2H	31.5923	30646175	0.179051	0.0457118
BM174	2H	31.5923	30734927	0.179051	0.0458452
BM175	2H	31.5923	30800677	0.179051	0.045944
BM176	2H	31.5923	31367310	0.179051	0.0467957
BM177	2H	31.5923	31499475	0.179051	0.0469943
BM178	2H	31.5923	31549202	0.179051	0.0470691
BM179	2H	31.5923	31705925	0.179051	0.0473046
BM180	2H	31.8971	31717368	0.180778	0.0473218
BM181	2H	32.202	31771583	0.182506	0.0474033
BM182	2H	32.5069	31795297	0.184234	0.0474389
BM183	2H	32.8137	31923907	0.185973	0.0476322
BM184	2H	32.8137	31969738	0.185973	0.0477011
BM185	2H	32.8137	32141920	0.185973	0.0479599
BM186	2H	32.8137	32256102	0.185973	0.0481315
BM187	2H	32.8137	32961370	0.185973	0.0491915
BM188	2H	32.8137	33115754	0.185973	0.0494236
BM189	2H	33.1204	33136886	0.187711	0.0494553
BM190	2H	33.4272	33176408	0.18945	0.0495147
BM192	2H	34.0522	33359988	0.192992	0.0497906
BM193	2H	34.0522	33627469	0.192992	0.0501927
BM191	2H	34.3608	33295387	0.194741	0.0496935
BM194	2H	34.3608	33644008	0.194741	0.0502175
BM195	2H	34.3608	33999181	0.194741	0.0507513
BM196	2H	34.6676	34033209	0.19648	0.0508025
BM197	2H	34.6676	34173744	0.19648	0.0510137
BM198	2H	34.6676	34208778	0.19648	0.0510664
BM199	2H	34.9743	34285826	0.198218	0.0511822
BM200	2H	34.9743	34292310	0.198218	0.0511919
BM201	2H	34.9743	34317981	0.198218	0.0512305
BM202	2H	35.2811	34546933	0.199957	0.0515746
BM203	2H	35.5879	34564592	0.201696	0.0516011
BM204	2H	35.5879	34643021	0.201696	0.051719
BM205	2H	35.5879	34891033	0.201696	0.0520918
BM206	2H	35.5879	34942633	0.201696	0.0521693
BM207	2H	35.5879	34962202	0.201696	0.0521987
BM208	2H	35.5879	34984128	0.201696	0.0522317
BM209	2H	35.5879	35025981	0.201696	0.0522946
BM210	2H	35.5879	35172567	0.201696	0.0525149
BM211	2H	35.5879	35459982	0.201696	0.0529469
BM212	2H	35.5879	35490660	0.201696	0.052993
BM213	2H	35.5879	35571796	0.201696	0.0531149
BM214	2H	35.5879	35613279	0.201696	0.0531773
BM215	2H	35.5879	35642756	0.201696	0.0532216
BM216	2H	35.5879	35808688	0.201696	0.053471
BM217	2H	35.8965	35971634	0.203445	0.0537159
BM218	2H	35.8965	36173239	0.203445	0.0540189
BM219	2H	35.8965	36206272	0.203445	0.0540686
BM220	2H	35.8965	36265056	0.203445	0.0541569
BM221	2H	35.8965	36346399	0.203445	0.0542792
BM222	2H	36.5138	36458796	0.206943	0.0544481
BM223	2H	36.8206	36486232	0.208682	0.0544893
BM224	2H	37.1273	36512276	0.21042	0.0545285
BM225	2H	37.1273	36731362	0.21042	0.0548578
BM226	2H	37.1273	36868805	0.21042	0.0550643
BM227	2H	37.4322	37056845	0.212148	0.0553469
BM228	2H	37.4322	37091373	0.212148	0.0553988
BM229	2H	37.7389	37575658	0.213887	0.0561267
BM230	2H	38.0476	37599133	0.215636	0.056162
BM231	2H	38.0476	37607748	0.215636	0.0561749
BM232	2H	38.0476	37669580	0.215636	0.0562679
BM233	2H	38.0476	38227651	0.215636	0.0571066
BM234	2H	38.0476	38349337	0.215636	0.0572895
BM235	2H	38.0476	38503089	0.215636	0.0575206
BM236	2H	38.0476	38729803	0.215636	0.0578614
BM237	2H	38.0476	38819625	0.215636	0.0579964
BM238	2H	38.0476	38853575	0.215636	0.0580474
BM239	2H	38.0476	39122550	0.215636	0.0584517
BM240	2H	38.0476	39802047	0.215636	0.0594729
BM241	2H	38.0476	40207807	0.215636	0.0600828
BM242	2H	38.0476	40300379	0.215636	0.0602219
BM243	2H	38.3506	40385572	0.217354	0.06035
BM244	2H	38.6537	40391761	0.219071	0.0603593
BM245	2H	38.9567	40481448	0.220789	0.0604941
BM246	2H	38.9567	40899528	0.220789	0.0611224
BM247	2H	39.5702	40910478	0.224266	0.0611389
BM248	2H	40.1838	41004820	0.227743	0.0612807
BM249	2H	40.4886	41011866	0.229471	0.0612913
BM250	2H	40.4886	41018488	0.229471	0.0613012
BM251	2H	40.7917	41026347	0.231189	0.061313
BM252	2H	41.4052	41048786	0.234666	0.0613468
BM253	2H	41.4052	41183533	0.234666	0.0615493
BM254	2H	41.4052	41506339	0.234666	0.0620345
BM255	2H	41.7082	41668962	0.236383	0.0622789
BM256	2H	41.7082	41710568	0.236383	0.0623414
BM257	2H	41.7082	41795901	0.236383	0.0624697
BM258	2H	42.0113	42261655	0.238101	0.0631697
BM259	2H	42.3125	42303521	0.239808	0.0632326
BM260	2H	42.3125	42312660	0.239808	0.0632463
BM261	2H	42.3125	43053820	0.239808	0.0643603
BM262	2H	42.6137	43631636	0.241515	0.0652287
BM263	2H	43.2161	43736210	0.244929	0.0653859
BM264	2H	43.2161	43803645	0.244929	0.0654873
BM265	2H	43.5137	45014760	0.246616	0.0673075
BM266	2H	44.4175	45132313	0.251738	0.0674842
BM267	2H	44.4175	45148148	0.251738	0.067508
BM268	2H	44.4175	45334796	0.251738	0.0677885
BM269	2H	44.4175	45384336	0.251738	0.067863
BM270	2H	45.0199	45553318	0.255152	0.068117
BM271	2H	45.3193	46594732	0.256849	0.0696822
BM272	2H	45.6187	46608705	0.258546	0.0697032
BM273	2H	45.6187	46717671	0.258546	0.069867
BM274	2H	45.9163	46953588	0.260232	0.0702216
BM275	2H	46.214	47206280	0.26192	0.0706014
BM276	2H	46.214	47397482	0.26192	0.0708887
BM277	2H	46.214	47545060	0.26192	0.0711105
BM278	2H	46.214	47799518	0.26192	0.071493
BM279	2H	46.214	47866671	0.26192	0.0715939
BM280	2H	46.214	48404242	0.26192	0.0724019
BM281	2H	46.5134	48712436	0.263617	0.0728651
BM282	2H	46.8128	48971848	0.265313	0.073255
BM283	2H	46.8128	48989577	0.265313	0.0732816
BM284	2H	47.1158	49017743	0.267031	0.0733239
BM286	2H	47.7256	49331862	0.270487	0.0737961
BM287	2H	47.7256	49800052	0.270487	0.0744997
BM285	2H	48.0286	49222179	0.272204	0.0736312
BM288	2H	48.0286	49951939	0.272204	0.074728
BM289	2H	48.0286	49973209	0.272204	0.07476
BM290	2H	48.0286	50191834	0.272204	0.0750886
BM291	2H	48.0286	50338758	0.272204	0.0753094
BM292	2H	48.3316	50391602	0.273921	0.0753888
BM293	2H	48.3316	50401704	0.273921	0.075404
BM294	2H	48.3316	51445733	0.273921	0.0769732
BM295	2H	48.6347	51631742	0.275639	0.0772527
BM296	2H	48.9377	52129893	0.277356	0.0780014
BM297	2H	49.2407	52559917	0.279074	0.0786478
BM298	2H	49.8543	52694136	0.282551	0.0788495
BM299	2H	49.8543	53035008	0.282551	0.0793618
BM300	2H	50.161	53280191	0.284289	0.0797303
BM301	2H	50.161	54382875	0.284289	0.0813876
BM302	2H	50.4697	54716923	0.286039	0.0818897
BM303	2H	50.4697	54860043	0.286039	0.0821048
BM304	2H	50.4697	54882293	0.286039	0.0821382
BM305	2H	50.4697	55254949	0.286039	0.0826983
BM306	2H	50.4697	55349878	0.286039	0.082841
BM307	2H	50.4697	55631534	0.286039	0.0832643
BM308	2H	50.4697	55795223	0.286039	0.0835104
BM309	2H	50.4697	55911494	0.286039	0.0836851
BM310	2H	50.7746	55917651	0.287767	0.0836944
BM311	2H	50.7746	55934076	0.287767	0.0837191
BM312	2H	51.0776	56000718	0.289484	0.0838192
BM313	2H	51.0776	56006139	0.289484	0.0838274
BM314	2H	51.0776	56071585	0.289484	0.0839257
BM315	2H	51.0776	56104634	0.289484	0.0839754
BM316	2H	51.0776	56251714	0.289484	0.0841965
BM317	2H	51.0776	56507039	0.289484	0.0845802
BM318	2H	51.0776	56527705	0.289484	0.0846113
BM319	2H	51.0776	56532866	0.289484	0.084619
BM320	2H	51.0776	56559232	0.289484	0.0846587
BM321	2H	51.6837	56758876	0.292919	0.0849587
BM322	2H	51.6837	56777597	0.292919	0.0849869
BM323	2H	51.6837	56872241	0.292919	0.0851291
BM324	2H	51.6837	56901105	0.292919	0.0851725
BM325	2H	51.6837	56946550	0.292919	0.0852408
BM326	2H	51.6837	57028955	0.292919	0.0853646
BM327	2H	51.6837	57106156	0.292919	0.0854807
BM328	2H	51.6837	57118082	0.292919	0.0854986
BM329	2H	51.6837	57251569	0.292919	0.0856992
BM330	2H	51.6837	57806295	0.292919	0.086533
BM331	2H	51.9849	57930597	0.294626	0.0867198
BM332	2H	52.2879	58171951	0.296344	0.0870825
BM333	2H	52.2879	58287999	0.296344	0.087257
BM334	2H	52.2879	58751465	0.296344	0.0879535
BM335	2H	52.2879	58765885	0.296344	0.0879752
BM336	2H	52.2879	58801971	0.296344	0.0880294
BM337	2H	52.5873	59227944	0.298041	0.0886697
BM338	2H	52.8867	59288522	0.299737	0.0887607
BM339	2H	53.1879	59310408	0.301445	0.0887936
BM340	2H	53.1879	59446328	0.301445	0.0889979
BM341	2H	53.1879	59529570	0.301445	0.089123
BM342	2H	53.1879	59610797	0.301445	0.0892451
BM343	2H	53.1879	59936669	0.301445	0.0897349
BM344	2H	53.1879	59977649	0.301445	0.0897965
BM345	2H	53.1879	60721283	0.301445	0.0909141
BM346	2H	53.4873	60762046	0.303141	0.0909754
BM347	2H	53.4873	60955750	0.303141	0.0912665
BM348	2H	53.7886	61079633	0.304849	0.0914527
BM349	2H	53.7886	61160524	0.304849	0.0915743
BM350	2H	53.7886	61536953	0.304849	0.0921401
BM351	2H	53.7886	61624245	0.304849	0.0922713
BM352	2H	54.088	61696128	0.306546	0.0923793
BM353	2H	54.3874	62022258	0.308243	0.0928695
BM354	2H	54.3874	62126493	0.308243	0.0930261
BM355	2H	54.6886	62161715	0.30995	0.0930791
BM356	2H	54.9898	62189559	0.311657	0.0931209
BM357	2H	54.9898	62457036	0.311657	0.0935229
BM358	2H	54.9898	62547494	0.311657	0.0936589
BM359	2H	55.5996	62553515	0.315113	0.0936679
BM360	2H	55.9008	62725687	0.31682	0.0939267
BM361	2H	55.9008	62840551	0.31682	0.0940994
BM362	2H	56.2038	63333649	0.318537	0.0948405
BM363	2H	56.2038	63482572	0.318537	0.0950643
BM364	2H	56.2038	63523713	0.318537	0.0951261
BM365	2H	56.8136	63532391	0.321993	0.0951392
BM366	2H	57.1166	63802595	0.323711	0.0955453
BM367	2H	57.4197	63808294	0.325428	0.0955539
BM368	2H	57.7227	63823822	0.327146	0.0955772
BM369	2H	57.7227	63943500	0.327146	0.0957571
BM370	2H	57.7227	64709400	0.327146	0.0969082
BM371	2H	57.7227	65014068	0.327146	0.0973661
BM372	2H	57.7227	65822604	0.327146	0.0985813
BM373	2H	57.7227	66061524	0.327146	0.0989404
BM374	2H	57.7227	66123178	0.327146	0.0990331
BM375	2H	58.0239	66200640	0.328853	0.0991495
BM376	2H	58.0239	66358740	0.328853	0.0993871
BM377	2H	58.0239	66587318	0.328853	0.0997307
BM378	2H	58.0239	66768635	0.328853	0.100003
BM379	2H	58.0239	66927746	0.328853	0.100242
BM380	2H	58.3251	67376286	0.33056	0.100916
BM381	2H	58.3251	67700510	0.33056	0.101404
BM382	2H	58.3251	67716085	0.33056	0.101427
BM383	2H	58.3251	67743477	0.33056	0.101468
BM384	2H	58.3251	67883764	0.33056	0.101679
BM385	2H	58.9387	68012528	0.334037	0.101873
BM386	2H	58.9387	68176338	0.334037	0.102119
BM387	2H	58.9387	68279995	0.334037	0.102275
BM388	2H	58.9387	68355107	0.334037	0.102388
BM389	2H	58.9387	68539757	0.334037	0.102665
BM390	2H	58.9387	68556442	0.334037	0.10269
BM391	2H	58.9387	68628846	0.334037	0.102799
BM392	2H	58.9387	68691058	0.334037	0.102893
BM393	2H	58.9387	68857534	0.334037	0.103143
BM394	2H	59.5522	68888209	0.337514	0.103189
BM395	2H	59.5522	68967579	0.337514	0.103308
BM396	2H	59.5522	68973254	0.337514	0.103317
BM397	2H	59.5522	69140974	0.337514	0.103569
BM398	2H	59.8534	69240716	0.339222	0.103719
BM399	2H	59.8534	69280202	0.339222	0.103778
BM400	2H	59.8534	69774218	0.339222	0.104521
BM401	2H	59.8534	70000306	0.339222	0.10486
BM402	2H	59.8534	77976284	0.339222	0.116848
BM403	2H	59.8534	78753167	0.339222	0.118016
BM404	2H	60.151	79189246	0.340908	0.118671
BM405	2H	60.4486	79648364	0.342595	0.119361
BM406	2H	60.4486	80131223	0.342595	0.120087
BM407	2H	60.4486	81532474	0.342595	0.122193
BM408	2H	60.4486	81671736	0.342595	0.122402
BM409	2H	60.4486	81699886	0.342595	0.122445
BM410	2H	60.4486	81932804	0.342595	0.122795
BM411	2H	60.7463	82071854	0.344282	0.123004
BM412	2H	60.7463	82315514	0.344282	0.12337
BM413	2H	60.7463	82365076	0.344282	0.123444
BM414	2H	61.3451	82415155	0.347676	0.12352
BM415	2H	61.3451	82476836	0.347676	0.123612
BM416	2H	61.3451	82489842	0.347676	0.123632
BM417	2H	61.3451	82591657	0.347676	0.123785
BM418	2H	61.3451	83562549	0.347676	0.125244
BM419	2H	61.3451	83644590	0.347676	0.125367
BM420	2H	61.3451	83760157	0.347676	0.125541
BM421	2H	61.3451	83919144	0.347676	0.12578
BM422	2H	61.3451	84189588	0.347676	0.126187
BM423	2H	61.3451	84314680	0.347676	0.126375
BM424	2H	61.3451	84522931	0.347676	0.126688
BM425	2H	61.3451	84549505	0.347676	0.126727
BM426	2H	61.3451	84628410	0.347676	0.126846
BM427	2H	61.3451	84647628	0.347676	0.126875
BM428	2H	61.3451	84665313	0.347676	0.126902
BM429	2H	61.3451	85031872	0.347676	0.127452
BM430	2H	61.3451	85116168	0.347676	0.127579
BM431	2H	61.3451	85180396	0.347676	0.127676
BM432	2H	61.3451	85442803	0.347676	0.12807
BM433	2H	61.3451	85502432	0.347676	0.12816
BM434	2H	61.3451	85595432	0.347676	0.128299
BM435	2H	61.3451	85641989	0.347676	0.128369
BM436	2H	61.3451	85742169	0.347676	0.12852
BM437	2H	61.3451	85891140	0.347676	0.128744
BM438	2H	61.3451	85944097	0.347676	0.128824
BM439	2H	61.3451	86077833	0.347676	0.129025
BM440	2H	61.3451	86205065	0.347676	0.129216
BM441	2H	61.3451	86310099	0.347676	0.129374
BM442	2H	61.3451	86736909	0.347676	0.130015
BM443	2H	61.3451	86765620	0.347676	0.130058
BM444	2H	61.3451	86829937	0.347676	0.130155
BM445	2H	61.3451	86885046	0.347676	0.130238
BM446	2H	61.3451	87034475	0.347676	0.130462
BM447	2H	61.3451	87387813	0.347676	0.130993
BM448	2H	61.3451	87482673	0.347676	0.131136
BM449	2H	61.3451	87653037	0.347676	0.131392
BM450	2H	61.3451	87762863	0.347676	0.131557
BM451	2H	61.3451	87797752	0.347676	0.13161
BM452	2H	61.3451	88138130	0.347676	0.132121
BM453	2H	61.3451	88300490	0.347676	0.132365
BM454	2H	61.3451	88333718	0.347676	0.132415
BM455	2H	61.3451	88440624	0.347676	0.132576
BM456	2H	61.3451	88585416	0.347676	0.132793
BM457	2H	61.3451	88605144	0.347676	0.132823
BM458	2H	61.3451	88845989	0.347676	0.133185
BM459	2H	61.3451	89279783	0.347676	0.133837
BM460	2H	61.3451	89407397	0.347676	0.134029
BM461	2H	61.3451	89472065	0.347676	0.134126
BM462	2H	61.3451	89708048	0.347676	0.134481
BM463	2H	61.3451	89757649	0.347676	0.134555
BM464	2H	61.3451	89821426	0.347676	0.134651
BM465	2H	61.3451	89880007	0.347676	0.134739
BM466	2H	61.3451	89904860	0.347676	0.134776
BM467	2H	61.3451	89995936	0.347676	0.134913
BM468	2H	61.3451	90078669	0.347676	0.135038
BM469	2H	61.3451	90788256	0.347676	0.136104
BM470	2H	61.3451	90865460	0.347676	0.13622
BM471	2H	61.3451	90949253	0.347676	0.136346
BM472	2H	61.3451	90966829	0.347676	0.136373
BM473	2H	61.3451	91016714	0.347676	0.136448
BM474	2H	61.3451	91149468	0.347676	0.136647
BM475	2H	61.3451	91269621	0.347676	0.136828
BM476	2H	61.3451	91344338	0.347676	0.13694
BM477	2H	61.6427	91571514	0.349362	0.137281
BM478	2H	61.9421	91607778	0.351059	0.137336
BM479	2H	61.9421	91659724	0.351059	0.137414
BM480	2H	61.9421	91760394	0.351059	0.137565
BM481	2H	61.9421	91843462	0.351059	0.13769
BM482	2H	61.9421	91955540	0.351059	0.137859
BM483	2H	61.9421	92044255	0.351059	0.137992
BM484	2H	61.9421	92220885	0.351059	0.138257
BM485	2H	61.9421	92288218	0.351059	0.138359
BM486	2H	61.9421	92487798	0.351059	0.138659
BM487	2H	61.9421	92553883	0.351059	0.138758
BM488	2H	61.9421	92722225	0.351059	0.139011
BM489	2H	61.9421	93002423	0.351059	0.139432
BM490	2H	61.9421	93062860	0.351059	0.139523
BM491	2H	61.9421	93192293	0.351059	0.139717
BM492	2H	61.9421	93225565	0.351059	0.139767
BM493	2H	61.9421	93235145	0.351059	0.139782
BM494	2H	61.9421	93370110	0.351059	0.139985
BM495	2H	62.238	93418180	0.352736	0.140057
BM496	2H	62.238	94435092	0.352736	0.141585
BM497	2H	62.5338	94917628	0.354413	0.142311
BM498	2H	62.5338	95268408	0.354413	0.142838
BM499	2H	62.5338	95388531	0.354413	0.143018
BM500	2H	62.8332	95523043	0.35611	0.143221
BM501	2H	62.8332	95638518	0.35611	0.143394
BM502	2H	62.8332	95711285	0.35611	0.143503
BM503	2H	62.8332	95790900	0.35611	0.143623
BM504	2H	63.1309	95866809	0.357797	0.143737
BM505	2H	63.1309	95924883	0.357797	0.143824
BM506	2H	63.1309	95964508	0.357797	0.143884
BM507	2H	63.1309	96109004	0.357797	0.144101
BM508	2H	63.4285	96193755	0.359484	0.144229
BM509	2H	63.4285	96213870	0.359484	0.144259
BM510	2H	63.4285	96265331	0.359484	0.144336
BM511	2H	63.4285	96343900	0.359484	0.144454
BM512	2H	63.4285	96361911	0.359484	0.144481
BM513	2H	63.4285	96379280	0.359484	0.144507
BM514	2H	63.4285	96473828	0.359484	0.14465
BM515	2H	63.4285	96481048	0.359484	0.14466
BM516	2H	63.4285	96543820	0.359484	0.144755
BM517	2H	63.4285	96610947	0.359484	0.144856
BM518	2H	63.7261	96753567	0.36117	0.14507
BM519	2H	63.7261	96763380	0.36117	0.145085
BM520	2H	63.7261	96779783	0.36117	0.145109
BM521	2H	63.7261	97033318	0.36117	0.14549
BM522	2H	63.7261	97140947	0.36117	0.145652
BM523	2H	63.7261	97269544	0.36117	0.145845
BM524	2H	63.7261	97288418	0.36117	0.145874
BM525	2H	63.7261	97444449	0.36117	0.146108
BM526	2H	63.7261	97480273	0.36117	0.146162
BM527	2H	63.7261	97491329	0.36117	0.146179
BM528	2H	63.7261	97618726	0.36117	0.14637
BM529	2H	63.7261	98802761	0.36117	0.14815
BM530	2H	63.7261	101985831	0.36117	0.152934
BM531	2H	63.7261	101992835	0.36117	0.152944
BM532	2H	63.7261	102026497	0.36117	0.152995
BM533	2H	63.7261	102076709	0.36117	0.153071
BM534	2H	64.022	102106616	0.362847	0.153115
BM535	2H	64.022	102115392	0.362847	0.153129
BM536	2H	64.022	102210890	0.362847	0.153272
BM537	2H	64.3178	102236128	0.364524	0.15331
BM538	2H	64.6137	102257552	0.366201	0.153342
BM539	2H	64.9095	102279264	0.367877	0.153375
BM540	2H	65.2054	102350808	0.369554	0.153483
BM541	2H	65.2054	102475259	0.369554	0.15367
BM542	2H	65.2054	102504508	0.369554	0.153714
BM543	2H	65.5013	102966500	0.371231	0.154408
BM544	2H	65.7971	103177010	0.372908	0.154724
BM545	2H	65.7971	103455655	0.372908	0.155143
BM546	2H	65.7971	103511401	0.372908	0.155227
BM547	2H	65.7971	103549886	0.372908	0.155285
BM548	2H	65.7971	103968800	0.372908	0.155914
BM549	2H	65.7971	104345951	0.372908	0.156481
BM550	2H	65.7971	104764655	0.372908	0.15711
BM551	2H	65.7971	104801523	0.372908	0.157166
BM552	2H	65.7971	104902503	0.372908	0.157318
BM553	2H	65.7971	104912305	0.372908	0.157332
BM554	2H	65.7971	104951427	0.372908	0.157391
BM555	2H	65.7971	104993711	0.372908	0.157455
BM556	2H	65.7971	105048145	0.372908	0.157537
BM557	2H	65.7971	105125774	0.372908	0.157653
BM558	2H	65.7971	105304671	0.372908	0.157922
BM559	2H	65.7971	105325220	0.372908	0.157953
BM560	2H	65.7971	105373389	0.372908	0.158025
BM561	2H	65.7971	105421655	0.372908	0.158098
BM562	2H	65.7971	105665636	0.372908	0.158465
BM563	2H	65.7971	105685111	0.372908	0.158494
BM564	2H	65.7971	105736300	0.372908	0.158571
BM565	2H	65.7971	105790113	0.372908	0.158652
BM566	2H	65.7971	105840230	0.372908	0.158727
BM567	2H	65.7971	105880164	0.372908	0.158787
BM568	2H	65.7971	105931841	0.372908	0.158865
BM569	2H	65.7971	105957501	0.372908	0.158903
BM570	2H	65.7971	105977577	0.372908	0.158933
BM571	2H	65.7971	106027498	0.372908	0.159008
BM572	2H	65.7971	106059339	0.372908	0.159056
BM573	2H	65.7971	106091280	0.372908	0.159104
BM574	2H	65.7971	106137217	0.372908	0.159173
BM575	2H	65.7971	106146850	0.372908	0.159188
BM576	2H	65.7971	106189337	0.372908	0.159252
BM577	2H	65.7971	106243747	0.372908	0.159334
BM578	2H	65.7971	106379721	0.372908	0.159538
BM579	2H	65.7971	106532783	0.372908	0.159768
BM580	2H	65.7971	106609981	0.372908	0.159884
BM581	2H	65.7971	106710595	0.372908	0.160035
BM582	2H	65.7971	106805527	0.372908	0.160178
BM583	2H	65.7971	106939634	0.372908	0.160379
BM584	2H	65.7971	106947862	0.372908	0.160392
BM585	2H	65.7971	107028637	0.372908	0.160513
BM586	2H	65.7971	107121507	0.372908	0.160653
BM587	2H	65.7971	107127578	0.372908	0.160662
BM588	2H	65.7971	107260832	0.372908	0.160862
BM589	2H	65.7971	107343260	0.372908	0.160986
BM590	2H	65.7971	107363876	0.372908	0.161017
BM591	2H	65.7971	107396962	0.372908	0.161067
BM592	2H	65.7971	107453728	0.372908	0.161152
BM593	2H	65.7971	107481556	0.372908	0.161194
BM594	2H	65.7971	107490960	0.372908	0.161208
BM595	2H	65.7971	107575851	0.372908	0.161336
BM596	2H	65.7971	107600381	0.372908	0.161373
BM597	2H	65.7971	107613361	0.372908	0.161392
BM598	2H	65.7971	107685173	0.372908	0.1615
BM599	2H	65.7971	107849545	0.372908	0.161747
BM600	2H	65.7971	108096180	0.372908	0.162118
BM601	2H	65.7971	108193338	0.372908	0.162264
BM602	2H	65.7971	108226947	0.372908	0.162314
BM603	2H	65.7971	108286423	0.372908	0.162404
BM604	2H	65.7971	108357278	0.372908	0.16251
BM605	2H	65.7971	108365216	0.372908	0.162522
BM606	2H	65.7971	108420818	0.372908	0.162606
BM607	2H	65.7971	108442870	0.372908	0.162639
BM608	2H	65.7971	108481672	0.372908	0.162697
BM609	2H	65.7971	108621022	0.372908	0.162907
BM610	2H	65.7971	108634601	0.372908	0.162927
BM611	2H	66.3996	108723678	0.376322	0.163061
BM612	2H	66.9984	108823406	0.379716	0.163211
BM613	2H	66.9984	108901007	0.379716	0.163327
BM614	2H	66.9984	108958354	0.379716	0.163414
BM615	2H	66.9984	109006352	0.379716	0.163486
BM616	2H	66.9984	109242421	0.379716	0.16384
BM617	2H	66.9984	109383253	0.379716	0.164052
BM618	2H	66.9984	109669413	0.379716	0.164482
BM619	2H	66.9984	109727882	0.379716	0.16457
BM620	2H	66.9984	109814266	0.379716	0.1647
BM621	2H	66.9984	109943358	0.379716	0.164894
BM622	2H	66.9984	110081946	0.379716	0.165102
BM623	2H	66.9984	110168392	0.379716	0.165232
BM624	2H	66.9984	110213688	0.379716	0.1653
BM625	2H	66.9984	110353766	0.379716	0.165511
BM626	2H	66.9984	110493136	0.379716	0.16572
BM627	2H	66.9984	110513825	0.379716	0.165751
BM628	2H	66.9984	110616926	0.379716	0.165906
BM629	2H	66.9984	110625604	0.379716	0.165919
BM630	2H	66.9984	110818054	0.379716	0.166209
BM631	2H	66.9984	110914183	0.379716	0.166353
BM632	2H	66.9984	110931941	0.379716	0.16638
BM633	2H	67.2943	113285353	0.381393	0.169917
BM634	2H	67.2943	114573410	0.381393	0.171853
BM635	2H	67.2943	116991812	0.381393	0.175488
BM636	2H	67.2943	119767002	0.381393	0.179659
BM637	2H	67.5937	120492236	0.38309	0.180749
BM638	2H	67.5937	121996538	0.38309	0.18301
BM639	2H	67.5937	123645620	0.38309	0.185488
BM640	2H	67.5937	124154372	0.38309	0.186253
BM641	2H	67.5937	126795305	0.38309	0.190222
BM642	2H	67.5937	127772885	0.38309	0.191691
BM643	2H	67.5937	127824268	0.38309	0.191769
BM644	2H	67.5937	127929977	0.38309	0.191927
BM645	2H	67.5937	128044116	0.38309	0.192099
BM646	2H	67.5937	128110992	0.38309	0.1922
BM647	2H	67.5937	128375264	0.38309	0.192597
BM648	2H	67.5937	129060094	0.38309	0.193626
BM649	2H	67.5937	129201435	0.38309	0.193838
BM650	2H	67.5937	129870929	0.38309	0.194845
BM651	2H	67.5937	129986214	0.38309	0.195018
BM652	2H	67.5937	130389370	0.38309	0.195624
BM653	2H	67.5937	130473503	0.38309	0.19575
BM654	2H	67.5937	130562609	0.38309	0.195884
BM655	2H	67.5937	131170337	0.38309	0.196798
BM656	2H	67.5937	131564396	0.38309	0.19739
BM657	2H	67.5937	132447458	0.38309	0.198717
BM658	2H	67.5937	132472194	0.38309	0.198754
BM659	2H	67.5937	132540791	0.38309	0.198857
BM660	2H	67.5937	132720948	0.38309	0.199128
BM661	2H	67.5937	133038489	0.38309	0.199605
BM662	2H	67.5937	133173701	0.38309	0.199809
BM663	2H	67.5937	133242789	0.38309	0.199913
BM664	2H	67.5937	133418845	0.38309	0.200177
BM665	2H	67.5937	133466910	0.38309	0.200249
BM666	2H	67.5937	135285744	0.38309	0.202983
BM667	2H	67.5937	135390025	0.38309	0.20314
BM668	2H	67.5937	136432223	0.38309	0.204706
BM669	2H	67.5937	137714539	0.38309	0.206634
BM670	2H	67.5937	142778251	0.38309	0.214244
BM671	2H	67.5937	143092776	0.38309	0.214717
BM672	2H	67.5937	145482084	0.38309	0.218308
BM673	2H	67.5937	145661822	0.38309	0.218578
BM674	2H	67.5937	145965049	0.38309	0.219034
BM675	2H	67.5937	146324215	0.38309	0.219574
BM676	2H	67.5937	147023668	0.38309	0.220625
BM677	2H	67.8931	147266160	0.384787	0.220989
BM678	2H	67.8931	147480033	0.384787	0.221311
BM679	2H	67.8931	147945916	0.384787	0.222011
BM680	2H	67.8931	148121778	0.384787	0.222275
BM681	2H	67.8931	148154799	0.384787	0.222325
BM682	2H	67.8931	148372255	0.384787	0.222652
BM683	2H	67.8931	148451105	0.384787	0.22277
BM684	2H	67.8931	148768548	0.384787	0.223247
BM685	2H	67.8931	151034463	0.384787	0.226653
BM686	2H	67.8931	151113176	0.384787	0.226771
BM687	2H	67.8931	151255592	0.384787	0.226985
BM688	2H	67.8931	151769486	0.384787	0.227758
BM689	2H	67.8931	152217873	0.384787	0.228432
BM690	2H	67.8931	152376788	0.384787	0.228671
BM691	2H	67.8931	152862932	0.384787	0.229401
BM692	2H	67.8931	153034902	0.384787	0.22966
BM693	2H	67.8931	154043719	0.384787	0.231176
BM694	2H	67.8931	154289255	0.384787	0.231545
BM695	2H	67.8931	155028885	0.384787	0.232657
BM696	2H	68.1943	155047437	0.386494	0.232685
BM697	2H	68.1943	155216809	0.386494	0.232939
BM698	2H	68.1943	155785588	0.386494	0.233794
BM699	2H	68.1943	155927015	0.386494	0.234006
BM700	2H	68.1943	156339141	0.386494	0.234626
BM701	2H	68.1943	156751683	0.386494	0.235246
BM702	2H	68.1943	156815167	0.386494	0.235341
BM703	2H	68.1943	156909332	0.386494	0.235483
BM704	2H	68.1943	157086555	0.386494	0.235749
BM705	2H	68.1943	157490447	0.386494	0.236356
BM706	2H	68.4973	157602630	0.388211	0.236525
BM707	2H	68.4973	157625147	0.388211	0.236559
BM708	2H	68.4973	157752824	0.388211	0.236751
BM709	2H	68.4973	157760193	0.388211	0.236762
BM710	2H	68.4973	157766288	0.388211	0.236771
BM711	2H	68.4973	157879636	0.388211	0.236941
BM712	2H	68.4973	157891345	0.388211	0.236959
BM713	2H	68.4973	157953539	0.388211	0.237052
BM714	2H	68.4973	157995451	0.388211	0.237115
BM715	2H	68.4973	158080855	0.388211	0.237244
BM716	2H	68.4973	158139928	0.388211	0.237332
BM717	2H	68.4973	158178035	0.388211	0.23739
BM718	2H	68.4973	158194187	0.388211	0.237414
BM719	2H	68.4973	158260353	0.388211	0.237513
BM720	2H	68.4973	158350920	0.388211	0.23765
BM721	2H	68.8003	158420619	0.389928	0.237754
BM722	2H	68.8003	158535000	0.389928	0.237926
BM723	2H	68.8003	158772931	0.389928	0.238284
BM724	2H	68.8003	158907411	0.389928	0.238486
BM725	2H	68.8003	159084770	0.389928	0.238753
BM726	2H	68.8003	159220300	0.389928	0.238956
BM727	2H	68.8003	159263735	0.389928	0.239022
BM728	2H	68.8003	159351017	0.389928	0.239153
BM729	2H	68.8003	159567812	0.389928	0.239479
BM730	2H	68.8003	159597713	0.389928	0.239523
BM731	2H	68.8003	159649568	0.389928	0.239601
BM732	2H	68.8003	159664458	0.389928	0.239624
BM733	2H	68.8003	159780535	0.389928	0.239798
BM734	2H	68.8003	159791800	0.389928	0.239815
BM735	2H	68.8003	160280294	0.389928	0.240549
BM736	2H	68.8003	160325988	0.389928	0.240618
BM737	2H	68.8003	160473615	0.389928	0.24084
BM738	2H	68.8003	160486901	0.389928	0.24086
BM739	2H	68.8003	160669100	0.389928	0.241134
BM740	2H	68.8003	160776178	0.389928	0.241295
BM741	2H	68.8003	160937392	0.389928	0.241537
BM742	2H	68.8003	161133325	0.389928	0.241831
BM743	2H	68.8003	161416573	0.389928	0.242257
BM744	2H	68.8003	161565979	0.389928	0.242482
BM745	2H	68.8003	161622076	0.389928	0.242566
BM746	2H	68.8003	161694781	0.389928	0.242675
BM747	2H	68.8003	161763397	0.389928	0.242778
BM748	2H	68.8003	161826442	0.389928	0.242873
BM749	2H	68.8003	162099080	0.389928	0.243283
BM750	2H	68.8003	162125321	0.389928	0.243322
BM751	2H	68.8003	162513900	0.389928	0.243906
BM752	2H	68.8003	163324849	0.389928	0.245125
BM753	2H	69.1015	163429441	0.391636	0.245282
BM754	2H	69.1015	163675637	0.391636	0.245653
BM755	2H	69.1015	163714588	0.391636	0.245711
BM756	2H	69.1015	163726044	0.391636	0.245728
BM757	2H	69.1015	163926123	0.391636	0.246029
BM758	2H	69.1015	164001965	0.391636	0.246143
BM759	2H	69.1015	164090900	0.391636	0.246277
BM760	2H	69.1015	164170232	0.391636	0.246396
BM761	2H	69.1015	164204080	0.391636	0.246447
BM762	2H	69.1015	164347597	0.391636	0.246662
BM763	2H	69.1015	164503812	0.391636	0.246897
BM764	2H	69.1015	164658876	0.391636	0.24713
BM765	2H	69.1015	164845565	0.391636	0.247411
BM766	2H	69.1015	164953398	0.391636	0.247573
BM767	2H	69.1015	165031720	0.391636	0.247691
BM768	2H	69.1015	165127521	0.391636	0.247835
BM769	2H	69.1015	165219742	0.391636	0.247973
BM770	2H	69.1015	165407039	0.391636	0.248255
BM771	2H	69.1015	165585131	0.391636	0.248522
BM772	2H	69.1015	165675287	0.391636	0.248658
BM773	2H	69.1015	165904269	0.391636	0.249002
BM774	2H	69.1015	166006171	0.391636	0.249155
BM775	2H	69.1015	166053030	0.391636	0.249226
BM776	2H	69.1015	166112896	0.391636	0.249316
BM777	2H	69.1015	166221839	0.391636	0.249479
BM778	2H	69.1015	166292737	0.391636	0.249586
BM779	2H	69.1015	166345089	0.391636	0.249665
BM780	2H	69.1015	166380103	0.391636	0.249717
BM781	2H	69.1015	166389458	0.391636	0.249731
BM782	2H	69.1015	166505096	0.391636	0.249905
BM783	2H	69.1015	166603074	0.391636	0.250052
BM784	2H	69.1015	166620733	0.391636	0.250079
BM785	2H	69.1015	166706729	0.391636	0.250208
BM786	2H	69.1015	166750134	0.391636	0.250273
BM787	2H	69.1015	166807848	0.391636	0.25036
BM788	2H	69.1015	167034243	0.391636	0.2507
BM789	2H	69.4064	167339392	0.393364	0.251159
BM790	2H	69.4064	167760600	0.393364	0.251792
BM791	2H	69.4064	167844136	0.393364	0.251918
BM792	2H	69.4064	167876098	0.393364	0.251966
BM793	2H	69.4064	167987005	0.393364	0.252132
BM794	2H	69.4064	168015120	0.393364	0.252175
BM795	2H	69.4064	168150427	0.393364	0.252378
BM796	2H	69.4064	168518066	0.393364	0.252931
BM797	2H	69.4064	169053156	0.393364	0.253735
BM798	2H	69.4064	169108555	0.393364	0.253818
BM799	2H	69.4064	169349295	0.393364	0.25418
BM800	2H	69.4064	169539860	0.393364	0.254466
BM801	2H	69.4064	169760604	0.393364	0.254798
BM802	2H	69.4064	169983818	0.393364	0.255134
BM803	2H	69.4064	170023033	0.393364	0.255193
BM804	2H	69.4064	170349970	0.393364	0.255684
BM805	2H	69.4064	170605682	0.393364	0.256068
BM806	2H	69.4064	170611907	0.393364	0.256078
BM807	2H	69.4064	170668014	0.393364	0.256162
BM808	2H	69.4064	171277071	0.393364	0.257077
BM809	2H	69.4064	171398948	0.393364	0.257261
BM810	2H	69.4064	171468395	0.393364	0.257365
BM811	2H	69.4064	171550411	0.393364	0.257488
BM812	2H	69.4064	171591329	0.393364	0.25755
BM813	2H	69.4064	171658020	0.393364	0.25765
BM814	2H	69.4064	171804693	0.393364	0.25787
BM815	2H	69.4064	172190404	0.393364	0.25845
BM816	2H	69.4064	172294461	0.393364	0.258606
BM817	2H	69.4064	172453547	0.393364	0.258846
BM818	2H	69.4064	172493471	0.393364	0.258906
BM819	2H	69.4064	173816773	0.393364	0.260894
BM820	2H	69.4064	173841458	0.393364	0.260932
BM821	2H	69.4064	173890014	0.393364	0.261005
BM822	2H	69.4064	173970665	0.393364	0.261126
BM823	2H	69.4064	174180802	0.393364	0.261442
[truncated: 10,907 more rows]

## Sheet: Table S3
Table S3. Descriptive statistics of RIL population leaf size in different environments
Traits	Environments	The RIL Lines
		Range	Mean	SD	CV(%)	H2
FLL	2022WH	6.55-23.88	14.92	3.33	22.32	0.91
	2023WH	5.62-32.21	14.17	4.29	30.27
	2023XY	7.04-26.75	15.74	3.93	24.98
	2024WH	8.15-24.48	15.97	2.97	18.61
	2024XY	10.23-27.55	17.04	3.67	21.54
	BLUP	9.74-23.06	15.69	2.53	16.15
FLW	2022WH	0.83-2.13	1.56	0.24	15.35	0.92
	2023WH	0.68-2.54	1.49	0.28	19.07
	2023XY	0.80-2.32	1.58	0.28	17.67
	2024WH	0.85-2.25	1.57	0.23	14.59
	2024XY	1.05-2.25	1.55	0.24	15.52
	BLUP	1.05-2.05	1.55	0.18	11.47
FLA	2022WH	4.17-34.38	18.13	6.09	33.6	0.91
	2023WH	3.13-61.56	16.85	8.22	48.75
	2023XY	5.28-46.64	19.46	7.73	39.69
	2024WH	5.31-41.34	19.37	6.03	31.15
	2024XY	8.69-46.35	20.42	7.27	35.58
	BLUP	8.90-34.52	19.02	4.76	25.01
SLL	2022WH	12.96-32.60	21.94	3.46	15.76	0.88
	2023WH	11.72-39.03	21.82	5.04	23.11
	2023XY	11.88-41.10	24.07	5.15	21.4
	2024WH	16.43-33.42	25.5	3.27	12.84
	2024XY	16.3-37.03	27.6	4.24	15.35
	BLUP	16.99-31.52	24.19	2.69	11.11
SLW	2022WH	1.38-2.43	2.01	0.23	11.26	0.9
	2023WH	1.36-2.73	1.96	0.26	13.34
	2023XY	1.28-2.65	1.99	0.24	11.87
	2024WH	1.22-2.45	1.94	0.21	10.57
	2024XY	1.40-2.60	2.04	0.22	10.97
	BLUP	1.57-2.40	1.99	0.17	8.44
SLA	2022WH	14.88-54.56	33.49	7.69	22.95	0.9
	2023WH	12.52-80.01	32.83	11.08	33.74
	2023XY	12.80-69.17	36.59	10.97	29.98
	2024WH	16.53-58.10	37.58	7.75	20.63
	2024XY	18.78-70.43	42.69	10.17	23.82
	BLUP	22.28-54.35	36.89	6.25	16.95
TLL	2022WH	15.00-34.50	23.13	3.54	15.3	0.8
	2023WH	12.92-37.08	22.3	4.48	20.07
	2023XY	10.83-41.80	26.47	6.51	24.58
	2024WH	15.97-35.20	27.3	3.43	12.55
	2024XY	20.25-38.80	29.87	3.61	12.08
	BLUP	19.75-30.71	25.94	1.93	7.44
TLW	2022WH	1.38-2.43	1.94	0.23	11.73	0.92
	2023WH	1.12-2.65	1.84	0.24	13.28
	2023XY	1.16-2.57	1.97	0.26	13.45
	2024WH	1.07-2.42	1.88	0.21	11.25
	2024XY	1.48-2.6	1.98	0.24	12.15
	BLUP	1.53-2.37	1.94	0.17	8.71
TLA	2022WH	17.53-63.20	34.14	7.94	23.25	0.86
	2023WH	11.09-73.87	31.27	9.33	29.84
	2023XY	11.26-73.56	39.99	13.62	34.06
	2024WH	12.77-59.87	38.79	7.88	20.31
	2024XY	23.43-73.4	44.78	9.82	21.92
	BLUP	24.77-53.35	38.43	5.42	14.09

## Sheet: Table S4
	Table S4. QTLs related to leaf traits identified in less than four environments
TraitName	QTL	Env	Chr	Interval	Position	LeftMarker	RightMarker	LOD	PVE(%)	Add
FLA	QFla.hzau-2H.1	23WH	2	72.5-73.5	73	BM1168	BM1169	98.3129	25.2197	-21.5305
FLA	QFla.hzau-2H.2	24XY	2	73.5-74.5	74	BM1212	BM1216	8.8531	15.5786	2.9373
		22WH	2	75.5-76.5	76	BM1293	BM1294	9.1957	13.2561	2.4908
FLA	QFla.hzau-5H.1	23XY	5	0-0.5	0	EM1	EM2	3.8705	6.0157	-1.9572
		24XY	5	0-1.5	1	EM8	EM9	7.3152	12.4248	-2.5864
		FLA-BLUP	5	0-1.5	1	EM8	EM9	5.4862	6.452	-1.271
FLA	QFla.hzau-6H	24WH	6	47.5-48.5	48	FM244	FM247	4.224	6.0323	-1.5121
FLL	QFll.hzau-1H	FLL-BLUP	1	107.5-108.5	108	AM953	AM955	5.7582	4.5776	-0.5945
		24XY	1	110.5-112.5	112	AM963	AM964	3.867	6.0832	-0.9035
FLL	QFll.hzau-2H	24XY	2	73.5-74.5	74	BM1212	BM1216	10.4926	18.7934	1.6123
FLL	QFll.hzau-3H	FLL-BLUP	3	60.5-61.5	61	CM2032	CM2033	4.123	3.1391	-0.4932
FLL	QFll.hzau-5H.1	FLL-BLUP	5	0-0.5	0	EM1	EM2	4.3483	3.2939	-0.5046
		24XY	5	0-1.5	1	EM8	EM9	5.4335	8.6262	-1.0762
FLL	QFll.hzau-6H	24WH	6	45.5-46.5	46	FM234	FM235	4.5697	5.928	-0.7724
FLL	QFll.hzau-7H	24WH	7	102.5-103.5	103	GM842	GM843	3.0284	3.7855	-0.6094
FLW	QFlw.hzau-2H.1	24XY	2	73.5-74.5	74	BM1212	BM1216	6.4697	10.4046	0.0786
FLW	QFlw.hzau-2H.2	22WH	2	105.5-106.5	106	BM1766	BM1767	7.2782	4.9467	0.0748
FLW	QFlw.hzau-3H.1	FLW-BLUP	3	61.5-63.5	62	CM2036	CM2037	4.077	5.5859	-0.0341
FLW	QFlw.hzau-3H.2	23WH	3	66.5-67.5	67	CM2083	CM2084	4.0584	6.6129	-0.0729
FLW	QFlw.hzau-6H	24WH	6	47.5-48.5	48	FM244	FM247	6.0623	6.9009	-0.0664
SLA	QSla.hzau-1H	SLA-BLUP	1	107.5-109.5	108	AM953	AM955	5.1292	4.5028	-1.3881
		24XY	1	110.5-112.5	112	AM963	AM964	4.7238	6.633	-2.5582
SLA	QSla.hzau-2H.1	23WH	2	72.5-73.5	73	BM1168	BM1169	91.3359	32.3442	-22.7659
SLA	QSla.hzau-2H.2	24XY	2	73.5-74.5	74	BM1212	BM1216	5.7161	8.1724	2.8804
		SLA-BLUP	2	73.5-74.5	74	BM1212	BM1216	8.6182	7.852	1.8583
		22WH	2	75.5-76.5	76	BM1293	BM1294	3.8846	3.0343	2.0246
SLA	QSla.hzau-3H	24XY	3	121.5-122.5	122	CM2581	CM2582	3.6171	4.9621	-2.2222
SLA	QSla.hzau-4H.1	24WH	4	38.5-39.5	39	DM133	DM134	14.7898	10.9897	3.1952
SLA	QSla.hzau-4H.2	24WH	4	46.5-47.5	47	DM168	DM169	6.8465	4.5575	-2.0557
SLA	QSla.hzau-4H.3	23WH	4	97.5-98.5	98	DM1379	DM1380	30.6999	3.9156	8.0891
SLA	QSla.hzau-4H.4	23WH	4	99.5-100.5	100	DM1386	DM1387	20.0661	2.2739	-6.0697
SLA	QSla.hzau-5H.1	23XY	5	0-0.5	0	EM1	EM2	3.4376	5.6286	-2.6506
		SLA-BLUP	5	0-1.5	0	EM1	EM2	6.8704	6.0537	-1.6104
		24XY	5	0-1.5	1	EM8	EM9	4.2905	5.9261	-2.4189
SLA	QSla.hzau-5H.2	23WH	5	119.5-121.5	121	EM1685	EM1686	6.178	0.6067	3.415
SLA	QSla.hzau-6H.1	24WH	6	11.5-12.5	12	FM80	FM81	4.299	2.7425	-1.5921
SLA	QSla.hzau-6H.2	24WH	6	47.5-48.5	48	FM244	FM247	4.5642	3.0011	-1.6806
SLL	QSll.hzau-1H.1	24XY	1	111.5-112.5	112	AM963	AM964	5.1259	7.9203	-1.1956
SLL	QSll.hzau-1H.2	23WH	1	120.5-121.5	121	AM1008	AM1009	3.5304	6.2635	-1.2778
		SLL-BLUP	1	120.5-121.5	121	AM1008	AM1009	4.7303	4.3979	-0.5876
SLL	QSll.hzau-2H	23XY	2	73.5-74.5	74	BM1212	BM1216	4.1825	7.2079	1.4417
		24XY	2	73.5-74.5	74	BM1212	BM1216	8.1044	13.4534	1.5814
		22WH	2	75.5-76.5	76	BM1293	BM1294	7.6697	10.0436	1.351
SLL	QSll.hzau-3H.1	24WH	3	18.5-19.5	19	CM100	CM101	6.9479	6.4259	-0.9294
SLL	QSll.hzau-3H.2	24WH	3	35.5-36.5	36	CM226	CM227	3.6253	3.2329	0.6623
SLL	QSll.hzau-3H.3	24XY	3	121.5-122.5	122	CM2581	CM2582	5.5682	8.568	-1.2488
SLL	QSll.hzau-4H	SLL-BLUP	4	97.5-98.5	98	DM1379	DM1380	3.6688	3.3764	0.529
SLL	QSll.hzau-5H.1	23XY	5	0-0.5	0	EM1	EM2	3.237	5.4991	-1.2432
		SLL-BLUP	5	0-0.5	0	EM1	EM2	3.8068	3.4978	-0.5244
SLL	QSll.hzau-6H	24WH	6	47.5-48.5	48	FM244	FM247	4.7516	4.3395	-0.7718
SLL	QSll.hzau-7H	24WH	7	100.5-101.5	101	GM836	GM837	5.2329	4.7501	-0.799
SLW	QSlw.hzau-2H	22WH	2	172.5-173.5	173	BM2089	BM2090	3.611	5.0402	0.0505
SLW	QSlw.hzau-4H.1	SLW-BLUP	4	32.5-34.5	34	DM117	DM118	3.9014	3.2271	0.0299
SLW	QSlw.hzau-4H.2	23WH	4	38.5-39.5	39	DM133	DM134	3.4143	3.2367	0.0479
		24WH	4	38.5-39.5	39	DM133	DM134	4.9125	4.6832	0.0474
SLW	QSlw.hzau-5H.1	24XY	5	0-1.5	1	EM8	EM9	4.6171	8.829	-0.0659
		SLW-BLUP	5	0-1.5	1	EM8	EM9	4.7674	4.0332	-0.0334
SLW	QSlw.hzau-6H.1	23WH	6	19.5-20.5	20	FM126	FM127	3.7474	3.5788	-0.0502
SLW	QSlw.hzau-6H.2	23WH	6	58.5-59.5	59	FM346	FM347	3.1074	2.9759	-0.0461
TLA	QTla.hzau-4H	24XY	4	97.5-98.5	98	DM1379	DM1380	3.9255	5.3687	2.4604
TLA	QTla.hzau-5H.1	24WH	5	0-0.5	0	EM1	EM2	4.3425	4.1167	-1.7252
		TLA-BLUP	5	0-0.5	0	EM1	EM2	4.7162	3.6469	-1.1852
TLL	QTll.hzau-1H	24XY	1	110.5-112.5	112	AM963	AM964	3.8599	4.006	-0.7934
TLL	QTll.hzau-2H.1	23XY	2	73.5-74.5	74	BM1212	BM1216	4.4519	9.4419	2.0873
		22WH	2	75.5-76.5	76	BM1293	BM1294	3.4883	4.1116	0.9599
TLL	QTll.hzau-2H.2	24XY	2	102.5-103.5	103	BM1752	BM1753	5.5659	5.829	-0.9874
TLL	QTll.hzau-3H	24WH	3	19.5-20.5	20	CM104	CM105	4.2638	3.5662	-0.7127
TLL	QTll.hzau-4H.1	24WH	4	55.5-56.5	56	DM800	DM803	4.759	4.0306	0.7631
TLL	QTll.hzau-4H.2	24XY	4	97.5-98.5	98	DM1379	DM1380	4.7198	4.8758	0.8998
TLL	QTll.hzau-5H.1	24WH	5	97.5-99.5	99	EM1596	EM1598	6.5204	5.7137	0.9041
TLL	QTll.hzau-7H	24WH	7	100.5-101.5	101	GM836	GM837	3.5787	2.9642	-0.65
TLW	QTlw.hzau-1H.1	23XY	1	70.5-71.5	71	AM752	AM756	10.3118	7.8654	0.1028
TLW	QTlw.hzau-1H.2	23XY	1	75.5-76.5	76	AM786	AM787	16.5942	14.2818	-0.1384
TLW	QTlw.hzau-2H	22WH	2	172.5-173.5	173	BM2089	BM2090	4.732	5.3522	0.0515
		TLW-BLUP	2	172.5-173.5	173	BM2089	BM2090	5.2455	3.2851	0.0328
TLW	QTlw.hzau-3H	24WH	3	76.5-77.5	77	CM2279	CM2283	3.4849	2.9327	0.0406
TLW	QTlw.hzau-4H.1	TLW-BLUP	4	27.5-29.5	29	DM89	DM90	6.8985	4.3564	0.0379
		24XY	4	31.5-32.5	32	DM114	DM115	8.6294	11.3754	0.0806
TLW	QTlw.hzau-4H.2	23WH	4	35.5-36.5	36	DM123	DM124	3.8639	3.9968	0.051
		24WH	4	38.5-39.5	39	DM133	DM134	4.4382	3.7835	0.0446
TLW	QTlw.hzau-5H.1	TLW-BLUP	5	0-1.5	1	EM8	EM9	5.6015	3.5032	-0.0339
TLW	QTlw.hzau-5H.3	24XY	5	141.5-142.5	142	EM1826	EM1827	4.1813	5.2244	-0.0589
TLW	QTlw.hzau-6H.1	24WH	6	11.5-12.5	12	FM80	FM81	3.5222	2.9615	-0.0394
		24XY	6	11.5-12.5	12	FM80	FM81	5.667	7.1454	-0.0637
TLW	QTlw.hzau-6H.2	24XY	6	52.5-53.5	53	FM252	FM253	3.6278	4.6102	-0.0513
TLW	QTlw.hzau-6H.3	23XY	6	77.5-78.5	78	FM1852	FM1853	4.3328	3.1205	-0.0655

## Sheet: Table S5
Table S5. Gene function annotation and confidence levels for the genomic region 128.5-129.5 cM on chromosome 5H
Gene_ID	Physical pos（bp）	Annotation	Confidence
HORVU.MOREX.r3.5HG0510940	527496290-527497312	HMG-Y-related protein A	high
HORVU.MOREX.r3.5HG0510950	527540110-527541816	Glucan endo-1	high
HORVU.MOREX.r3.5HG0510960	527559007-527560070	CDO504	high
HORVU.MOREX.r3.5HG0510970	527561299-527562180	3-beta-glucosidase 1	high
HORVU.MOREX.r3.5HG0510980	527563076-527567767	Protein TORNADO 1	high
HORVU.MOREX.r3.5HG0510990	527568059-527571525	oligopeptide transporter	high
HORVU.MOREX.r3.5HG0511000	527607374-527607907	branched-chain amino acid transaminase 2	low
HORVU.MOREX.r3.5HG0511010	527608646-527609821	Retrotransposon protein	low
HORVU.MOREX.r3.5HG0511020	527613562-527613777	Mitochondrial import inner me Mbrane translocase subunit TIM44	low
HORVU.MOREX.r3.5HG0511030	527614886-527615272	Retrotransposon protein	low
HORVU.MOREX.r3.5HG0511040	527617773-527619574	Heavy metal transport/detoxification superfamily protein	high
HORVU.MOREX.r3.5HG0511050	527650850-527651949	Retrotransposon protein	low
HORVU.MOREX.r3.5HG0511060	527662975-527663529	Di-glucose binding protein with Kinesin motor domain-containing protein	low
HORVU.MOREX.r3.5HG0511070	527664158-527664514	Peroxisome proliferator-activated receptor gamma coactivator 1-alpha	high
HORVU.MOREX.r3.5HG0511080	527667392-527667979	Serine/threonine protein phosphatase 7 long form isogeny	low
HORVU.MOREX.r3.5HG0511090	527774453-527779253	Phytochrome	high
HORVU.MOREX.r3.5HG0511100	527779461-527783360	DNA topoisomerase 6 subunit A	high
HORVU.MOREX.r3.5HG0511110	527783809-527793719	Potassium channel	high
HORVU.MOREX.r3.5HG0511120	527870977-527871832	Cytochrome oxidase complex asse Mbly protein	low
HORVU.MOREX.r3.5HG0511130	527896957-527900282	Chaperone DnaJ-domain containing protein	high
HORVU.MOREX.r3.5HG0511140	528057134-528059082	Cysteine protease	high
HORVU.MOREX.r3.5HG0511150	528117080-528118233	Potassium channel	high
HORVU.MOREX.r3.5HG0511160	528120721-528121668	Retrotransposon protein	low
HORVU.MOREX.r3.5HG0511170	528128152-528129930	Retrotransposon protein	low
HORVU.MOREX.r3.5HG0511180	528133594-528135372	Retrotransposon protein	low
HORVU.MOREX.r3.5HG0511190	528140881-528144424	DNA-binding protein with MIZ/SP-RING zinc finger	low
HORVU.MOREX.r3.5HG0511200	528142354-528143421	Transposase	high
HORVU.MOREX.r3.5HG0511210	528147816-528157990	MADS box transcription factor	high

## Sheet: Table S6
Table S6. High-density genetic map information of YJ and H30 RIL populations
Bin Marker	Chromosome	Genetic position	Physical position in genome assembly-start	Physical position in genome assembly-end	Physical position length
AM1	1H	0	1	664299	664298
AM2	1H	0.6098	664300	708151	43851
AM4	1H	0.6098	708152	1129385	421233
AM3	1H	0.6098	1129386	1750678	621292
AM5	1H	0.9092	1750679	2112740	362061
AM6	1H	1.5116	2112741	2177005	64264
AM7	1H	1.8147	2177006	2273380	96374
AM8	1H	1.8147	2273381	2310664	37283
AM9	1H	2.1195	2310665	2386622	75957
AM10	1H	2.1195	2386623	2782715	396092
AM12	1H	2.1195	2782716	2841292	58576
AM11	1H	2.1195	2841293	3019451	178158
AM13	1H	2.1195	3019452	3368545	349093
AM14	1H	2.1195	3368546	3582970	214424
AM15	1H	2.1195	3582971	4927820	1344849
AM16	1H	3.6632	4927821	5144377	216556
AM17	1H	4.2693	5144378	5380989	236611
AM18	1H	4.5705	5380990	5395838	14848
AM19	1H	4.5705	5395839	5404822	8983
AM20	1H	4.8699	5404823	5553140	148317
AM21	1H	4.8699	5553141	7779358	2226217
AM22	1H	4.8699	7779359	8345123	565764
AM23	1H	12.9823	8345124	8372264	27140
AM24	1H	12.9823	8372265	8968281	596016
AM25	1H	12.9823	8968282	9586313	618031
AM26	1H	12.9823	9586314	10483390	897076
AM27	1H	14.2021	10483391	10522091	38700
AM28	1H	14.8045	10522092	10531498	9406
AM29	1H	18.3135	10531499	10568867	37368
AM30	1H	18.6111	10568868	10821141	252273
AM31	1H	18.9087	10821142	10849379	28237
AM32	1H	18.9087	10849380	10875907	26527
AM33	1H	19.2046	10875908	11084890	208982
AM34	1H	19.2046	11084891	11246750	161859
AM35	1H	19.2046	11246751	11469002	222251
AM36	1H	19.2046	11469003	11499107	30104
AM37	1H	19.2046	11499108	11520164	21056
AM38	1H	19.5058	11520165	11629145	108980
AM39	1H	19.807	11629146	11639241	10095
AM40	1H	20.7217	11639242	11809730	170488
AM41	1H	20.7217	11809731	11891371	81640
AM42	1H	21.0211	11891372	12111458	220086
AM43	1H	21.0211	12111459	13197155	1085696
AM44	1H	21.3205	13197156	13232928	35772
AM45	1H	21.6199	13232929	13341972	109043
AM46	1H	21.6199	13341973	13373338	31365
AM47	1H	22.2188	13373339	13449321	75982
AM48	1H	22.8176	13449322	14143315	693993
AM49	1H	23.1152	14143316	14492591	349275
AM51	1H	23.1152	14492592	14613645	121053
AM50	1H	23.1152	14613646	14724513	110867
AM52	1H	24.0244	14724514	14738899	14385
AM53	1H	24.322	14738900	14788535	49635
AM54	1H	24.6197	14788536	15082645	294109
AM55	1H	24.6197	15082646	15210666	128020
AM56	1H	24.9155	15210667	15256436	45769
AM57	1H	24.9155	15256437	15333051	76614
AM58	1H	24.9155	15333052	15455112	122060
AM59	1H	25.2149	15455113	15486304	31191
AM60	1H	25.2149	15486305	15710922	224617
AM61	1H	25.8137	15710923	15757532	46609
AM62	1H	26.4126	15757533	15861781	104248
AM63	1H	26.4126	15861782	16173077	311295
AM64	1H	26.4126	16173078	16603492	430414
AM65	1H	27.0114	16603493	16789914	186421
AM66	1H	27.0114	16789915	16863203	73288
AM67	1H	27.3108	16863204	17165885	302681
AM68	1H	27.3108	17165886	17493566	327680
AM69	1H	27.3108	17493567	17510378	16811
AM70	1H	27.6102	17510379	19612104	2101725
AM71	1H	27.9096	19612105	19696790	84685
AM72	1H	27.9096	19696791	19836858	140067
AM73	1H	28.5157	19836859	19847760	10901
AM74	1H	28.8169	19847761	19893181	45420
AM75	1H	28.8169	19893182	20137558	244376
AM76	1H	29.7261	20137559	20154111	16552
AM77	1H	30.0255	20154112	20422836	268724
AM78	1H	30.0255	20422837	20541203	118366
AM79	1H	30.3267	20541204	20553736	12532
AM80	1H	30.6279	20553737	20604954	51217
AM81	1H	30.6279	20604955	20615024	10069
AM82	1H	30.9255	20615025	20661486	46461
AM83	1H	31.2232	20661487	20671186	9699
AM84	1H	31.5208	20671187	20690686	19499
AM85	1H	31.8202	20690687	20722777	32090
AM86	1H	32.1196	20722778	20873133	150355
AM87	1H	32.4172	20873134	20933311	60177
AM88	1H	33.016	20933312	20939224	5912
AM89	1H	33.3137	20939225	20959389	20164
AM90	1H	33.6113	20959390	20969462	10072
AM91	1H	33.9089	20969463	21055641	86178
AM92	1H	34.2065	21055642	21367019	311377
AM93	1H	34.2065	21367020	21579448	212428
AM95	1H	34.2065	21579449	21613806	34357
AM94	1H	34.2065	21613807	22093962	480155
AM96	1H	34.8126	22093963	22130964	37001
AM97	1H	35.112	22130965	22374753	243788
AM98	1H	35.112	22374754	22442406	67652
AM99	1H	35.4114	22442407	22453415	11008
AM100	1H	35.7108	22453416	22482224	28808
AM101	1H	36.0102	22482225	22705580	223355
AM102	1H	36.0102	22705581	22710667	5086
AM105	1H	36.6238	22710668	22812234	101566
AM104	1H	36.6238	22812235	22817967	5732
AM103	1H	36.9268	22817968	23468407	650439
AM106	1H	36.9268	23468408	23992463	524055
AM107	1H	36.9268	23992464	24262839	270375
AM108	1H	36.9268	24262840	24278798	15958
AM109	1H	37.228	24278799	24300545	21746
AM110	1H	37.8341	24300546	24393385	92839
AM111	1H	38.1353	24393386	24448343	54957
AM112	1H	38.4365	24448344	24639233	190889
AM113	1H	38.7377	24639234	24665489	26255
AM114	1H	39.039	24665490	24810100	144610
AM116	1H	39.039	24810101	24912357	102256
AM115	1H	39.039	24912358	25071642	159284
AM117	1H	39.342	25071643	25176342	104699
AM118	1H	39.342	25176343	25463997	287654
AM119	1H	39.342	25463998	25502824	38826
AM120	1H	39.342	25502825	25580381	77556
AM121	1H	39.6414	25580382	25674985	94603
AM124	1H	39.6414	25674986	25778114	103128
AM122	1H	39.6414	25778115	25832026	53911
AM125	1H	39.6414	25832027	25895196	63169
AM123	1H	39.6414	25895197	26212732	317535
AM130	1H	39.9444	26212733	26301848	89115
AM129	1H	39.9444	26301849	26390553	88704
AM126	1H	39.9444	26390554	26533019	142465
AM128	1H	39.9444	26533020	26590229	57209
AM131	1H	39.9444	26590230	26694483	104253
AM132	1H	39.9444	26694484	26769250	74766
AM134	1H	39.9444	26769251	26787392	18141
AM127	1H	39.9444	26787393	26856115	68722
AM133	1H	39.9444	26856116	27628137	772021
AM136	1H	39.9444	27628138	28231285	603147
AM135	1H	39.9444	28231286	28617647	386361
AM137	1H	39.9444	28617648	28712593	94945
AM138	1H	39.9444	28712594	28930215	217621
AM139	1H	40.2475	28930216	29160041	229825
AM140	1H	40.2475	29160042	29264550	104508
AM141	1H	40.2475	29264551	29273098	8547
AM142	1H	40.8572	29273099	29887244	614145
AM143	1H	40.8572	29887245	29982064	94819
AM144	1H	41.4633	29982065	30412446	430381
AM145	1H	41.7645	30412447	30441888	29441
AM146	1H	42.0658	30441889	31014776	572887
AM147	1H	42.0658	31014777	31033661	18884
AM151	1H	42.0658	31033662	31087315	53653
AM150	1H	42.0658	31087316	31192344	105028
AM152	1H	42.0658	31192345	31273850	81505
AM153	1H	42.0658	31273851	31301034	27183
AM148	1H	42.0658	31301035	31468009	166974
AM149	1H	42.0658	31468010	31475382	7372
AM154	1H	42.0658	31475383	31520583	45200
AM155	1H	42.0658	31520584	31618097	97513
AM156	1H	42.0658	31618098	31644958	26860
AM157	1H	42.0658	31644959	32253144	608185
AM158	1H	42.367	32253145	32380918	127773
AM159	1H	42.367	32380919	32499836	118917
AM160	1H	42.6682	32499837	32512183	12346
AM161	1H	42.6682	32512184	32546589	34405
AM162	1H	42.9712	32546590	32700901	154311
AM163	1H	43.2743	32700902	32707375	6473
AM164	1H	43.884	32707376	32720080	12704
AM165	1H	43.884	32720081	32773702	53621
AM166	1H	43.884	32773703	33016328	242625
AM167	1H	43.884	33016329	33267880	251551
AM168	1H	43.884	33267881	33439644	171763
AM169	1H	43.884	33439645	34792001	1352356
AM171	1H	43.884	34792002	34954529	162527
AM170	1H	43.884	34954530	35336334	381804
AM172	1H	43.884	35336335	35769127	432792
AM173	1H	43.884	35769128	36382435	613307
AM174	1H	43.884	36382436	36996069	613633
AM175	1H	43.884	36996070	37054129	58059
AM176	1H	44.1889	37054130	37292664	238534
AM177	1H	44.4938	37292665	37377501	84836
AM178	1H	44.7987	37377502	37554158	176656
AM179	1H	45.1036	37554159	37571580	17421
AM180	1H	45.4084	37571581	40199684	2628103
AM181	1H	45.7133	40199685	40297960	98275
AM182	1H	45.7133	40297961	41649479	1351518
AM183	1H	46.0164	41649480	42696190	1046710
AM184	1H	46.3194	42696191	42853994	157803
AM188	1H	46.3194	42853995	43027432	173437
AM187	1H	46.3194	43027433	43056796	29363
AM186	1H	46.3194	43056797	43069354	12557
AM185	1H	46.3194	43069355	43882823	813468
AM189	1H	46.3194	43882824	44007016	124192
AM190	1H	46.3194	44007017	44502275	495258
AM191	1H	46.3194	44502276	44725631	223355
AM192	1H	46.3194	44725632	44799644	74012
AM193	1H	46.3194	44799645	44964557	164912
AM194	1H	46.3194	44964558	45297552	332994
AM195	1H	46.6206	45297553	45307938	10385
AM196	1H	46.9218	45307939	45474515	166576
AM197	1H	46.9218	45474516	45720065	245549
AM198	1H	46.9218	45720066	46025567	305501
AM199	1H	46.9218	46025568	46262968	237400
AM200	1H	46.9218	46262969	46499035	236066
AM201	1H	46.9218	46499036	46507149	8113
AM202	1H	46.9218	46507150	46606228	99078
AM203	1H	46.9218	46606229	46643761	37532
AM205	1H	46.9218	46643762	46708708	64946
AM207	1H	46.9218	46708709	46821180	112471
AM206	1H	46.9218	46821181	46967045	145864
AM208	1H	46.9218	46967046	47056406	89360
AM210	1H	46.9218	47056407	47362003	305596
AM212	1H	46.9218	47362004	47400243	38239
AM214	1H	46.9218	47400244	47656610	256366
AM209	1H	46.9218	47656611	47804478	147867
AM211	1H	46.9218	47804479	47918091	113612
AM213	1H	46.9218	47918092	48094625	176533
AM215	1H	46.9218	48094626	48441916	347290
AM204	1H	46.9218	48441917	49268469	826552
AM216	1H	46.9218	49268470	49371499	103029
AM220	1H	46.9218	49371500	49403337	31837
AM217	1H	46.9218	49403338	49760574	357236
AM221	1H	46.9218	49760575	49777000	16425
AM218	1H	46.9218	49777001	50056628	279627
AM222	1H	46.9218	50056629	50086370	29741
AM224	1H	46.9218	50086371	50701805	615434
AM226	1H	46.9218	50701806	50859038	157232
AM228	1H	46.9218	50859039	51682771	823732
AM219	1H	46.9218	51682772	52117669	434897
AM223	1H	46.9218	52117670	52635931	518261
AM225	1H	46.9218	52635932	52663663	27731
AM227	1H	46.9218	52663664	52934041	270377
AM229	1H	46.9218	52934042	53021536	87494
AM231	1H	46.9218	53021537	53422371	400834
AM233	1H	46.9218	53422372	53522214	99842
AM230	1H	46.9218	53522215	54191442	669227
AM232	1H	46.9218	54191443	54355802	164359
AM234	1H	46.9218	54355803	54438368	82565
AM236	1H	46.9218	54438369	54735023	296654
AM235	1H	46.9218	54735024	54958961	223937
AM237	1H	46.9218	54958962	55233317	274355
AM239	1H	46.9218	55233318	55390002	156684
AM238	1H	46.9218	55390003	55413168	23165
AM241	1H	47.2248	55413169	55468838	55669
AM240	1H	47.2248	55468839	55993051	524212
AM242	1H	47.2248	55993052	56233043	239991
AM247	1H	47.2248	56233044	56272741	39697
AM244	1H	47.2248	56272742	56340244	67502
AM246	1H	47.2248	56340245	56452480	112235
AM243	1H	47.2248	56452481	56474880	22399
AM245	1H	47.2248	56474881	56539438	64557
AM248	1H	47.2248	56539439	57501029	961590
AM249	1H	47.8346	57501030	57729949	228919
AM250	1H	48.1377	57729950	57744783	14833
AM251	1H	48.1377	57744784	57989647	244863
AM252	1H	48.1377	57989648	58116926	127278
AM253	1H	48.1377	58116927	58135095	18168
AM254	1H	48.1377	58135096	58212410	77314
AM255	1H	48.1377	58212411	59334882	1122471
AM256	1H	48.4426	59334883	60272290	937407
AM257	1H	48.7474	60272291	61105478	833187
AM259	1H	48.7474	61105479	61224341	118862
AM258	1H	48.7474	61224342	68881818	7657476
AM260	1H	48.7474	68881819	69550720	668901
AM261	1H	48.7474	69550721	70497733	947012
AM263	1H	48.7474	70497734	70655024	157290
AM264	1H	48.7474	70655025	70922379	267354
AM265	1H	48.7474	70922380	71267753	345373
AM267	1H	48.7474	71267754	71362167	94413
AM262	1H	48.7474	71362168	71469968	107800
AM266	1H	48.7474	71469969	71768261	298292
AM268	1H	49.3647	71768262	71878738	110476
AM269	1H	49.3647	71878739	72016766	138027
AM270	1H	49.3647	72016767	72766793	750026
AM271	1H	49.6696	72766794	72818524	51730
AM272	1H	49.9745	72818525	72959874	141349
AM273	1H	49.9745	72959875	75217341	2257466
AM277	1H	49.9745	75217342	75532019	314677
AM274	1H	49.9745	75532020	75658903	126883
AM276	1H	49.9745	75658904	75823914	165010
AM279	1H	49.9745	75823915	75931102	107187
AM275	1H	49.9745	75931103	75996870	65767
AM278	1H	49.9745	75996871	76193529	196658
AM281	1H	49.9745	76193530	76251858	58328
AM282	1H	49.9745	76251859	76312453	60594
AM283	1H	49.9745	76312454	76329640	17186
AM280	1H	49.9745	76329641	76837871	508230
AM284	1H	49.9745	76837872	77196295	358423
AM285	1H	49.9745	77196296	77219389	23093
AM286	1H	49.9745	77219390	77268825	49435
AM288	1H	49.9745	77268826	79013592	1744766
AM287	1H	49.9745	79013593	79083730	70137
AM289	1H	49.9745	79083731	82350666	3266935
AM290	1H	49.9745	82350667	82495931	145264
AM291	1H	50.2721	82495932	82593942	98010
AM292	1H	50.2721	82593943	83595572	1001629
AM293	1H	50.5715	83595573	85972427	2376854
AM294	1H	50.5715	85972428	88285329	2312901
AM296	1H	50.5715	88285330	93873677	5588347
AM295	1H	50.5715	93873678	96251995	2378317
AM297	1H	50.5715	96251996	99485741	3233745
AM298	1H	50.8746	99485742	121821937	22336195
AM300	1H	50.8746	121821938	123244041	1422103
AM302	1H	50.8746	123244042	128196152	4952110
AM304	1H	50.8746	128196153	130969681	2773528
AM306	1H	50.8746	130969682	138323402	7353720
AM299	1H	50.8746	138323403	140567405	2244002
AM301	1H	50.8746	140567406	166663914	26096508
AM303	1H	50.8746	166663915	168559459	1895544
AM305	1H	50.8746	168559460	181673718	13114258
AM307	1H	50.8746	181673719	185245724	3572005
AM309	1H	50.8746	185245725	192475941	7230216
AM311	1H	50.8746	192475942	197155459	4679517
AM313	1H	50.8746	197155460	200052354	2896894
AM315	1H	50.8746	200052355	201293140	1240785
AM308	1H	50.8746	201293141	222881139	21587998
AM310	1H	50.8746	222881140	224810182	1929042
AM312	1H	50.8746	224810183	231610276	6800093
AM314	1H	50.8746	231610277	236480508	4870231
AM316	1H	50.8746	236480509	238947271	2466762
AM318	1H	50.8746	238947272	240292890	1345618
AM320	1H	50.8746	240292891	243090681	2797790
AM317	1H	50.8746	243090682	244492444	1401762
AM319	1H	50.8746	244492445	255542591	11050146
AM321	1H	50.8746	255542592	257067666	1525074
AM322	1H	50.8746	257067667	257189766	122099
AM323	1H	50.8746	257189767	257993049	803282
AM325	1H	50.8746	257993050	258347914	354864
AM327	1H	50.8746	258347915	258641270	293355
AM329	1H	50.8746	258641271	259699736	1058465
AM331	1H	50.8746	259699737	259838440	138703
AM324	1H	50.8746	259838441	263921954	4083513
AM326	1H	50.8746	263921955	264604606	682651
AM328	1H	50.8746	264604607	264823046	218439
AM330	1H	50.8746	264823047	265940777	1117730
AM332	1H	50.8746	265940778	266528331	587553
AM335	1H	50.8746	266528332	266639172	110840
AM336	1H	50.8746	266639173	266787607	148434
AM337	1H	50.8746	266787608	268273952	1486344
AM334	1H	50.8746	268273953	268431176	157223
AM333	1H	50.8746	268431177	268787926	356749
AM338	1H	50.8746	268787927	268804108	16181
AM342	1H	50.8746	268804109	268951597	147488
AM341	1H	50.8746	268951598	269031654	80056
AM340	1H	50.8746	269031655	269138512	106857
AM344	1H	50.8746	269138513	269204343	65830
AM346	1H	50.8746	269204344	269244585	40241
AM348	1H	50.8746	269244586	269589760	345174
AM347	1H	50.8746	269589761	269649370	59609
AM349	1H	50.8746	269649371	269962964	313593
AM350	1H	50.8746	269962965	270498639	535674
AM339	1H	50.8746	270498640	270656856	158216
AM343	1H	50.8746	270656857	270852167	195310
AM345	1H	50.8746	270852168	270872601	20433
AM351	1H	50.8746	270872602	270923788	51186
AM352	1H	50.8746	270923789	271764008	840219
AM353	1H	50.8746	271764009	272070238	306229
AM355	1H	50.8746	272070239	272254667	184428
AM359	1H	50.8746	272254668	272303777	49109
AM356	1H	50.8746	272303778	272452329	148551
AM358	1H	50.8746	272452330	272571714	119384
AM357	1H	50.8746	272571715	272724438	152723
AM354	1H	50.8746	272724439	280668156	7943717
AM360	1H	50.8746	280668157	281459743	791586
AM362	1H	50.8746	281459744	283349498	1889754
AM364	1H	50.8746	283349499	283430438	80939
AM366	1H	50.8746	283430439	289130479	5700040
AM361	1H	50.8746	289130480	291571359	2440879
AM363	1H	50.8746	291571360	294507295	2935935
AM365	1H	50.8746	294507296	299079192	4571896
AM367	1H	50.8746	299079193	304940991	5861798
AM368	1H	50.8746	304940992	304990810	49818
AM370	1H	50.8746	304990811	305157400	166589
AM369	1H	50.8746	305157401	305254090	96689
AM371	1H	50.8746	305254091	305524836	270745
AM372	1H	50.8746	305524837	305599012	74175
AM374	1H	50.8746	305599013	305757274	158261
AM373	1H	50.8746	305757275	305883187	125912
AM375	1H	50.8746	305883188	306013481	130293
AM376	1H	50.8746	306013482	306211491	198009
AM378	1H	50.8746	306211492	306415161	203669
AM382	1H	50.8746	306415162	307957323	1542161
AM377	1H	50.8746	307957324	308199223	241899
AM379	1H	50.8746	308199224	308312463	113239
AM381	1H	50.8746	308312464	308570655	258191
AM383	1H	50.8746	308570656	309013868	443212
AM380	1H	50.8746	309013869	309228513	214644
AM385	1H	50.8746	309228514	309325227	96713
AM384	1H	50.8746	309325228	309560061	234833
AM386	1H	50.8746	309560062	309755255	195193
AM388	1H	50.8746	309755256	310476395	721139
AM392	1H	50.8746	310476396	310863073	386677
AM387	1H	50.8746	310863074	310994752	131678
AM389	1H	50.8746	310994753	311107758	113005
AM391	1H	50.8746	311107759	311124363	16604
AM393	1H	50.8746	311124364	311310997	186633
AM394	1H	50.8746	311310998	311547226	236228
AM395	1H	50.8746	311547227	311887088	339861
AM390	1H	50.8746	311887089	311993490	106401
AM396	1H	50.8746	311993491	312091385	97894
AM398	1H	50.8746	312091386	312718892	627506
AM402	1H	50.8746	312718893	312947323	228430
AM397	1H	50.8746	312947324	313014070	66746
AM399	1H	50.8746	313014071	313168313	154242
AM401	1H	50.8746	313168314	313479228	310914
AM403	1H	50.8746	313479229	313674940	195711
AM400	1H	50.8746	313674941	315527055	1852114
AM404	1H	50.8746	315527056	315829490	302434
AM406	1H	50.8746	315829491	315889447	59956
AM410	1H	50.8746	315889448	315998215	108767
AM405	1H	50.8746	315998216	316034345	36129
AM407	1H	50.8746	316034346	316078033	43687
AM409	1H	50.8746	316078034	316320506	242472
AM411	1H	50.8746	316320507	316744671	424164
AM412	1H	50.8746	316744672	317796252	1051580
AM413	1H	50.8746	317796253	318011205	214952
AM408	1H	50.8746	318011206	318040287	29081
AM414	1H	50.8746	318040288	318117361	77073
AM416	1H	50.8746	318117362	318491366	374004
AM415	1H	50.8746	318491367	318620062	128695
AM417	1H	50.8746	318620063	318983381	363318
AM419	1H	50.8746	318983382	319229530	246148
AM418	1H	50.8746	319229531	320190633	961102
AM420	1H	50.8746	320190634	320352580	161946
AM422	1H	50.8746	320352581	320548953	196372
AM426	1H	50.8746	320548954	320720848	171894
AM421	1H	50.8746	320720849	320890999	170150
AM423	1H	50.8746	320891000	321015472	124472
AM425	1H	50.8746	321015473	321338651	323178
AM424	1H	50.8746	321338652	321443179	104527
AM428	1H	50.8746	321443180	321943704	500524
AM429	1H	50.8746	321943705	321951910	8205
AM430	1H	50.8746	321951911	322027216	75305
AM432	1H	50.8746	322027217	322061006	33789
AM434	1H	50.8746	322061007	322445606	384599
AM436	1H	50.8746	322445607	322606176	160569
AM435	1H	50.8746	322606177	322667426	61249
AM437	1H	50.8746	322667427	322749097	81670
AM438	1H	50.8746	322749098	322856000	106902
AM427	1H	50.8746	322856001	322989181	133180
AM431	1H	50.8746	322989182	323079967	90785
AM433	1H	50.8746	323079968	323124667	44699
AM439	1H	50.8746	323124668	323206160	81492
AM440	1H	50.8746	323206161	323222010	15849
AM441	1H	50.8746	323222011	323315265	93254
AM442	1H	50.8746	323315266	323339431	24165
AM444	1H	50.8746	323339432	324179661	840229
AM446	1H	50.8746	324179662	324514881	335219
AM448	1H	50.8746	324514882	325041479	526597
AM443	1H	50.8746	325041480	325156431	114951
AM445	1H	50.8746	325156432	325253489	97057
AM447	1H	50.8746	325253490	325539687	286197
AM449	1H	50.8746	325539688	325663092	123404
AM450	1H	50.8746	325663093	325713355	50262
AM452	1H	50.8746	325713356	325767577	54221
AM454	1H	50.8746	325767578	325855613	88035
AM451	1H	50.8746	325855614	325924461	68847
AM453	1H	50.8746	325924462	325988726	64264
AM456	1H	50.8746	325988727	327374597	1385870
AM455	1H	50.8746	327374598	327517727	143129
AM457	1H	50.8746	327517728	327767856	250128
AM459	1H	50.8746	327767857	328741000	973143
AM461	1H	50.8746	328741001	329267976	526975
AM458	1H	50.8746	329267977	329326807	58830
AM460	1H	50.8746	329326808	329738834	412026
AM462	1H	50.8746	329738835	329933198	194363
AM464	1H	50.8746	329933199	330387055	453856
AM468	1H	50.8746	330387056	330576803	189747
AM467	1H	50.8746	330576804	330778200	201396
AM466	1H	50.8746	330778201	330791249	13048
AM463	1H	50.8746	330791250	330942013	150763
AM465	1H	50.8746	330942014	331018352	76338
AM469	1H	50.8746	331018353	331119957	101604
AM471	1H	50.8746	331119958	331445832	325874
AM473	1H	50.8746	331445833	331993922	548089
AM470	1H	50.8746	331993923	334557123	2563200
AM472	1H	50.8746	334557124	341871597	7314473
AM474	1H	50.8746	341871598	342513274	641676
AM475	1H	50.8746	342513275	342610961	97686
AM477	1H	50.8746	342610962	342676943	65981
AM476	1H	50.8746	342676944	344331592	1654648
AM479	1H	51.1758	344331593	344509714	178121
AM478	1H	51.1758	344509715	344593292	83577
AM480	1H	51.1758	344593293	344650188	56895
AM482	1H	51.1758	344650189	344744411	94222
AM481	1H	51.1758	344744412	344827084	82672
AM483	1H	51.4807	344827085	344934733	107648
AM485	1H	51.4807	344934734	345324095	389361
AM487	1H	51.4807	345324096	346306651	982555
AM484	1H	51.4807	346306652	346387164	80512
AM486	1H	51.4807	346387165	346530662	143497
AM488	1H	51.4807	346530663	346816976	286313
AM489	1H	51.4807	346816977	346965696	148719
AM490	1H	51.7837	346965697	347572358	606661
AM492	1H	51.7837	347572359	347741312	168953
AM494	1H	51.7837	347741313	348066868	325555
AM491	1H	51.7837	348066869	348784642	717773
AM493	1H	51.7837	348784643	348819037	34394
AM495	1H	52.0867	348819038	349070854	251816
AM497	1H	52.0867	349070855	349155448	84593
AM496	1H	52.0867	349155449	349312912	157463
AM498	1H	52.0867	349312913	349421523	108610
AM499	1H	52.3879	349421524	349782852	361328
AM503	1H	52.3879	349782853	349817311	34458
AM505	1H	52.3879	349817312	349828571	11259
AM502	1H	52.3879	349828572	350118341	289769
AM504	1H	52.3879	350118342	350287187	168845
AM506	1H	52.3879	350287188	350826366	539178
AM507	1H	52.3879	350826367	350935060	108693
AM509	1H	52.3879	350935061	351184887	249826
AM511	1H	52.3879	351184888	351347391	162503
AM508	1H	52.3879	351347392	352525871	1178479
AM510	1H	52.3879	352525872	353424254	898382
AM512	1H	52.3879	353424255	354186597	762342
AM513	1H	52.3879	354186598	354872609	686011
AM515	1H	52.3879	354872610	355105843	233233
AM517	1H	52.3879	355105844	355250799	144955
AM500	1H	52.3879	355250800	355784516	533716
AM501	1H	52.3879	355784517	356571340	786823
AM514	1H	52.3879	356571341	356812726	241385
AM516	1H	52.3879	356812727	357024938	212211
AM518	1H	52.3879	357024939	357430587	405648
AM519	1H	52.691	357430588	360876427	3445839
AM521	1H	52.691	360876428	360962067	85639
AM520	1H	52.691	360962068	361389249	427181
AM523	1H	52.691	361389250	361851934	462684
AM525	1H	52.691	361851935	361947078	95143
AM527	1H	52.691	361947079	363297037	1349958
AM522	1H	52.691	363297038	363436933	139895
AM524	1H	52.691	363436934	364018765	581831
AM526	1H	52.691	364018766	364174677	155911
AM528	1H	52.691	364174678	364808849	634171
AM529	1H	52.691	364808850	365062795	253945
AM531	1H	52.691	365062796	365226238	163442
AM533	1H	52.691	365226239	365433978	207739
AM535	1H	52.691	365433979	365650088	216109
AM530	1H	52.691	365650089	366248253	598164
AM532	1H	52.691	366248254	366391128	142874
AM534	1H	52.691	366391129	366704531	313402
AM536	1H	52.691	366704532	366877689	173157
AM540	1H	52.691	366877690	366933628	55938
AM542	1H	52.691	366933629	366997852	64223
AM537	1H	52.691	366997853	367417198	419345
AM538	1H	52.691	367417199	367605950	188751
AM539	1H	52.691	367605951	368001189	395238
AM541	1H	52.691	368001190	368088752	87562
AM543	1H	52.691	368088753	368430569	341816
AM545	1H	52.691	368430570	368551723	121153
AM544	1H	52.691	368551724	368765777	214053
AM546	1H	52.691	368765778	368863475	97697
AM548	1H	52.9977	368863476	369177147	313671
AM550	1H	52.9977	369177148	369438675	261527
AM547	1H	52.9977	369438676	369535985	97309
AM549	1H	52.9977	369535986	369679847	143861
AM551	1H	52.9977	369679848	369714114	34266
AM552	1H	52.9977	369714115	369720063	5948
AM553	1H	52.9977	369720064	369791506	71442
AM554	1H	52.9977	369791507	370136908	345401
AM556	1H	52.9977	370136909	370163933	27024
AM555	1H	52.9977	370163934	370444933	280999
AM558	1H	52.9977	370444934	370480546	35612
AM559	1H	52.9977	370480547	370701680	221133
AM560	1H	52.9977	370701681	370769578	67897
AM557	1H	53.3026	370769579	370980059	210480
AM561	1H	53.3026	370980060	372387443	1407383
AM563	1H	53.3026	372387444	372512366	124922
AM565	1H	53.3026	372512367	372598888	86521
AM562	1H	53.3026	372598889	373906332	1307443
AM564	1H	53.3026	373906333	374014531	108198
AM566	1H	53.3026	374014532	374818863	804331
AM567	1H	53.3026	374818864	375317957	499093
AM568	1H	53.3026	375317958	376928038	1610080
AM569	1H	53.6056	376928039	378474193	1546154
AM570	1H	53.6056	378474194	378809644	335450
AM571	1H	53.9068	378809645	379220481	410836
AM572	1H	53.9068	379220482	381117494	1897012
AM573	1H	55.1417	381117495	381126077	8582
AM574	1H	55.1417	381126078	381248973	122895
AM576	1H	55.1417	381248974	381409634	160660
AM575	1H	55.1417	381409635	381715610	305975
AM578	1H	55.4447	381715611	381757067	41456
AM580	1H	55.4447	381757068	382133615	376547
AM577	1H	55.4447	382133616	382812619	679003
AM579	1H	55.4447	382812620	383330139	517519
AM581	1H	55.4447	383330140	383388485	58345
AM582	1H	55.7496	383388486	383396525	8039
AM583	1H	56.3631	383396526	383423588	27062
AM584	1H	56.9766	383423589	383772537	348948
AM585	1H	56.9766	383772538	383818578	46040
AM586	1H	56.9766	383818579	384382913	564334
AM587	1H	56.9766	384382914	385364559	981645
AM589	1H	56.9766	385364560	385493088	128528
AM591	1H	56.9766	385493089	385643336	150247
AM590	1H	56.9766	385643337	385781811	138474
AM593	1H	56.9766	385781812	385960376	178564
AM588	1H	56.9766	385960377	385971161	10784
AM592	1H	56.9766	385971162	386026850	55688
AM594	1H	56.9766	386026851	386043461	16610
AM598	1H	56.9766	386043462	386189992	146530
AM600	1H	56.9766	386189993	386475831	285838
AM595	1H	56.9766	386475832	386514406	38574
AM599	1H	56.9766	386514407	386634112	119705
AM596	1H	56.9766	386634113	387008925	374812
AM597	1H	56.9766	387008926	387286162	277236
AM601	1H	57.5864	387286163	387340032	53869
AM602	1H	57.5864	387340033	387826640	486607
AM603	1H	57.5864	387826641	387936509	109868
AM604	1H	57.8932	387936510	388077823	141313
AM606	1H	57.8932	388077824	388216936	139112
AM608	1H	57.8932	388216937	388324482	107545
AM605	1H	57.8932	388324483	388872391	547908
AM607	1H	57.8932	388872392	391131721	2259329
AM609	1H	58.5105	391131722	391256421	124699
AM611	1H	58.5105	391256422	391574620	318198
AM615	1H	58.5105	391574621	391657036	82415
AM610	1H	58.5105	391657037	391852357	195320
AM612	1H	58.5105	391852358	391891174	38816
AM618	1H	58.5105	391891175	391905888	14713
AM613	1H	58.5105	391905889	392031308	125419
AM614	1H	58.5105	392031309	392106320	75011
AM616	1H	58.5105	392106321	392270408	164087
AM617	1H	58.5105	392270409	393113075	842666
AM619	1H	58.5105	393113076	393226158	113082
AM621	1H	58.5105	393226159	393380289	154130
AM620	1H	58.5105	393380290	393594800	214510
AM622	1H	58.5105	393594801	394011841	417040
AM623	1H	58.5105	394011842	394019051	7209
AM624	1H	58.5105	394019052	394212300	193248
AM625	1H	59.124	394212301	394347657	135356
AM626	1H	59.124	394347658	394413389	65731
AM627	1H	59.124	394413390	394570247	156857
AM628	1H	59.4327	394570248	394610678	40430
AM629	1H	59.4327	394610679	395868646	1257967
AM630	1H	59.4327	395868647	395973767	105120
AM631	1H	59.4327	395973768	396519401	545633
AM633	1H	59.4327	396519402	396596178	76776
AM632	1H	59.4327	396596179	396651594	55415
AM634	1H	59.4327	396651595	396875486	223891
AM635	1H	59.4327	396875487	397093588	218101
AM637	1H	59.4327	397093589	397250848	157259
AM636	1H	59.4327	397250849	397327348	76499
AM640	1H	59.7375	397327349	397494081	166732
AM639	1H	59.7375	397494082	397506026	11944
AM638	1H	59.7375	397506027	397680777	174750
AM642	1H	59.7375	397680778	397690394	9616
AM641	1H	59.7375	397690395	397928910	238515
AM643	1H	59.7375	397928911	398824865	895954
AM644	1H	60.3473	398824866	402464605	3639739
AM645	1H	60.3473	402464606	402853077	388471
AM646	1H	60.6522	402853078	402858760	5682
AM647	1H	60.9571	402858761	402865083	6322
AM648	1H	61.262	402865084	403077768	212684
AM650	1H	61.8793	403077769	403140008	62239
AM649	1H	61.8793	403140009	403272309	132300
AM651	1H	61.8793	403272310	403462153	189843
AM653	1H	61.8793	403462154	403527202	65048
AM656	1H	61.8793	403527203	403618977	91774
AM654	1H	61.8793	403618978	403677785	58807
AM655	1H	61.8793	403677786	403968569	290783
AM652	1H	61.8793	403968570	404223476	254906
AM657	1H	61.8793	404223477	404276850	53373
AM658	1H	61.8793	404276851	404323569	46718
AM659	1H	61.8793	404323570	404982902	659332
AM660	1H	61.8793	404982903	405376829	393926
AM661	1H	61.8793	405376830	405589894	213064
AM662	1H	61.8793	405589895	405964904	375009
AM663	1H	61.8793	405964905	405972861	7956
AM665	1H	61.8793	405972862	406053011	80149
AM664	1H	61.8793	406053012	406104222	51210
AM666	1H	61.8793	406104223	406257609	153386
AM667	1H	61.8793	406257610	406276503	18893
AM668	1H	61.8793	406276504	406310245	33741
AM671	1H	61.8793	406310246	406340684	30438
AM670	1H	61.8793	406340685	406568461	227776
AM669	1H	61.8793	406568462	406599757	31295
AM672	1H	61.8793	406599758	407377498	777740
AM674	1H	62.1823	407377499	407408398	30899
AM673	1H	62.1823	407408399	407501434	93035
AM675	1H	62.1823	407501435	407799274	297839
AM676	1H	62.1823	407799275	408025383	226108
AM677	1H	62.1823	408025384	408095214	69830
AM678	1H	62.1823	408095215	408440643	345428
AM680	1H	62.1823	408440644	408642544	201900
AM679	1H	62.1823	408642545	408774406	131861
AM681	1H	62.4872	408774407	409060255	285848
AM682	1H	62.4872	409060256	410253862	1193606
AM683	1H	62.4872	410253863	410488796	234933
AM684	1H	62.4872	410488797	414872130	4383333
AM685	1H	62.4872	414872131	414877945	5814
AM686	1H	62.4872	414877946	415088588	210642
AM687	1H	62.4872	415088589	415197470	108881
AM688	1H	62.4872	415197471	415226081	28610
AM691	1H	62.4872	415226082	415281109	55027
AM690	1H	62.4872	415281110	415382827	101717
AM689	1H	62.4872	415382828	415821571	438743
AM692	1H	62.4872	415821572	415906331	84759
AM693	1H	62.794	415906332	416089614	183282
AM694	1H	62.794	416089615	416163487	73872
AM695	1H	62.794	416163488	416206384	42896
AM696	1H	62.794	416206385	416246682	40297
AM697	1H	63.0988	416246683	416312754	66071
AM698	1H	63.0988	416312755	416542401	229646
AM699	1H	63.0988	416542402	416722638	180236
AM700	1H	63.7124	416722639	416977084	254445
AM701	1H	63.7124	416977085	417492382	515297
AM702	1H	64.0154	417492383	418017432	525049
AM703	1H	64.3184	418017433	418059894	42461
AM705	1H	64.6233	418059895	418139363	79468
AM707	1H	64.6233	418139364	418247896	108532
AM704	1H	64.6233	418247897	418324296	76399
AM706	1H	64.6233	418324297	418488429	164132
AM708	1H	64.6233	418488430	418621705	133275
AM709	1H	64.6233	418621706	418992827	371121
AM710	1H	64.6233	418992828	419173175	180347
AM711	1H	65.2331	419173176	419481004	307828
AM713	1H	65.2331	419481005	420359767	878762
AM712	1H	65.2331	420359768	420848044	488276
AM714	1H	65.2331	420848045	421356339	508294
AM715	1H	65.8429	421356340	421603785	247445
AM716	1H	65.8429	421603786	421968131	364345
AM717	1H	66.1459	421968132	422037309	69177
AM718	1H	66.1459	422037310	422305076	267766
AM719	1H	66.4471	422305077	422370414	65337
AM720	1H	66.7483	422370415	422662267	291852
AM722	1H	67.0532	422662268	423793085	1130817
AM721	1H	67.0532	423793086	423897622	104536
AM723	1H	67.0532	423897623	424377110	479487
AM724	1H	67.3544	424377111	424412525	35414
AM725	1H	67.9605	424412526	425490455	1077929
AM726	1H	69.1878	425490456	425625792	135336
AM727	1H	69.489	425625793	425720437	94644
AM728	1H	69.489	425720438	426092624	372186
AM729	1H	69.489	426092625	426249208	156583
AM730	1H	69.489	426249209	426430586	181377
AM731	1H	69.489	426430587	427013114	582527
AM732	1H	69.489	427013115	427315023	301908
AM733	1H	69.489	427315024	427466009	150985
AM734	1H	69.489	427466010	427471188	5178
AM735	1H	69.489	427471189	427548837	77648
AM736	1H	69.489	427548838	427588308	39470
AM737	1H	69.489	427588309	429781358	2193049
AM742	1H	69.489	429781359	430639552	858193
AM741	1H	69.489	430639553	430846869	207316
AM738	1H	69.489	430846870	431066726	219856
AM740	1H	69.489	431066727	431093705	26978
AM739	1H	69.489	431093706	431270209	176503
AM743	1H	69.489	431270210	431406471	136261
AM744	1H	69.7939	431406472	431415828	9356
AM745	1H	69.7939	431415829	431442499	26670
AM746	1H	69.7939	431442500	431566848	124348
AM748	1H	69.7939	431566849	431738003	171154
AM749	1H	69.7939	431738004	432080007	342003
AM747	1H	69.7939	432080008	432155972	75964
AM750	1H	70.0915	432155973	432431896	275923
AM751	1H	70.0915	432431897	432437237	5340
AM752	1H	70.0915	432437238	432528424	91186
AM756	1H	71.0062	432528425	432599781	71356
AM757	1H	71.0062	432599782	432758028	158246
AM753	1H	71.0062	432758029	432801322	43293
AM759	1H	71.0062	432801323	432878880	77557
AM760	1H	71.0062	432878881	432927721	48840
AM761	1H	71.0062	432927722	433067936	140214
AM754	1H	71.0062	433067937	433235355	167418
AM758	1H	71.0062	433235356	433470545	235189
AM762	1H	71.0062	433470546	433531307	60761
AM755	1H	71.0062	433531308	433769010	237702
AM764	1H	71.3038	433769011	433819855	50844
AM766	1H	71.3038	433819856	434495657	675801
AM763	1H	71.3038	434495658	434571241	75583
AM765	1H	71.3038	434571242	434747372	176130
AM767	1H	71.3038	434747373	434934717	187344
AM769	1H	71.3038	434934718	435299904	365186
AM768	1H	71.3038	435299905	435472430	172525
AM770	1H	71.3038	435472431	435485993	13562
AM771	1H	71.3038	435485994	435902191	416197
AM772	1H	71.6015	435902192	435911589	9397
AM773	1H	72.2003	435911590	435921029	9439
AM774	1H	72.4962	435921030	436305510	384480
AM776	1H	72.4962	436305511	436348919	43408
AM775	1H	72.4962	436348920	436400540	51620
AM777	1H	73.0986	436400541	436441905	41364
AM778	1H	73.3962	436441906	437904548	1462642
AM779	1H	73.6938	437904549	438175834	271285
AM780	1H	73.6938	438175835	438390628	214793
AM781	1H	73.9897	438390629	438963723	573094
AM782	1H	74.2856	438963724	439306019	342295
AM783	1H	74.2856	439306020	441681887	2375867
AM784	1H	75.1893	441681888	442178420	496532
AM785	1H	75.4851	442178421	442530347	351926
AM786	1H	75.781	442530348	442558502	28154
AM787	1H	76.0786	442558503	442613395	54892
AM788	1H	76.3745	442613396	443738814	1125418
AM789	1H	76.6703	443738815	447052827	3314012
AM790	1H	78.8189	447052828	447235034	182206
AM791	1H	79.1148	447235035	447257622	22587
AM792	1H	79.1148	447257623	447576078	318455
AM793	1H	79.4089	447576079	448718199	1142120
AM794	1H	79.703	448718200	448767253	49053
AM795	1H	79.703	448767254	448929745	162491
AM796	1H	79.9954	448929746	449515156	585410
AM798	1H	79.9954	449515157	449699262	184105
AM797	1H	79.9954	449699263	449964091	264828
AM799	1H	79.9954	449964092	450076479	112387
AM800	1H	80.293	450076480	450104230	27750
AM801	1H	80.5906	450104231	450754899	650668
AM802	1H	80.8883	450754900	451511248	756348
AM803	1H	81.1841	451511249	451616740	105491
AM804	1H	81.48	451616741	451685314	68573
AM805	1H	81.7758	451685315	451703058	17743
AM806	1H	82.0717	451703059	453143343	1440284
AM807	1H	82.3676	453143344	453901551	758207
AM808	1H	82.6634	453901552	454893485	991933
AM809	1H	83.2587	454893486	454996122	102636
AM810	1H	84.157	454996123	455204009	207886
AM811	1H	84.157	455204010	455281830	77820
AM812	1H	84.7558	455281831	455604825	322994
AM813	1H	84.7558	455604826	455638638	33812
AM814	1H	85.0552	455638639	455749108	110469
AM815	1H	85.3546	455749109	455956514	207405
AM816	1H	85.3546	455956515	456140867	184352
AM818	1H	85.3546	456140868	456330805	189937
AM817	1H	85.3546	456330806	457678522	1347716
AM819	1H	85.9571	457678523	458158723	480200
AM820	1H	86.5559	458158724	458368735	210011
AM821	1H	86.5559	458368736	460112644	1743908
AM822	1H	86.8553	460112645	460380590	267945
AM823	1H	87.4614	460380591	460840909	460318
AM824	1H	87.4614	460840910	461364311	523401
AM825	1H	87.4614	461364312	461375919	11607
AM826	1H	88.0602	461375920	461402274	26354
AM827	1H	88.3578	461402275	461683049	280774
AM828	1H	89.267	461683050	461694410	11360
AM829	1H	89.267	461694411	461855392	160981
AM830	1H	89.5682	461855393	462041635	186242
AM831	1H	89.5682	462041636	462263013	221377
AM832	1H	89.5682	462263014	462313644	50630
AM833	1H	89.8694	462313645	464246461	1932816
AM834	1H	90.1707	464246462	465825769	1579307
AM835	1H	91.0854	465825770	466221497	395727
AM836	1H	91.3866	466221498	466692421	470923
AM837	1H	91.6878	466692422	466864094	171672
AM838	1H	92.2939	466864095	467130718	266623
AM839	1H	92.5951	467130719	467988533	857814
AM840	1H	92.5951	467988534	468224857	236323
AM841	1H	93.5154	468224858	468971359	746501
AM842	1H	93.8185	468971360	469221977	250617
AM843	1H	94.1215	469221978	469543373	321395
AM845	1H	94.1215	469543374	469644668	101294
AM847	1H	94.1215	469644669	469828320	183651
AM849	1H	94.1215	469828321	469882146	53825
AM844	1H	94.1215	469882147	471180432	1298285
AM846	1H	94.1215	471180433	471622212	441779
AM848	1H	94.1215	471622213	471760868	138655
AM850	1H	94.1215	471760869	471817405	56536
AM851	1H	94.1215	471817406	471827821	10415
AM852	1H	94.1215	471827822	471835434	7612
AM853	1H	94.4227	471835435	471902045	66610
AM854	1H	94.7239	471902046	472060313	158267
AM855	1H	94.7239	472060314	472091960	31646
AM856	1H	94.7239	472091961	472109743	17782
AM857	1H	95.33	472109744	473383426	1273682
AM858	1H	95.9361	473383427	473397691	14264
AM859	1H	96.2373	473397692	473408065	10373
AM860	1H	96.2373	473408066	473419204	11138
AM861	1H	96.2373	473419205	473572474	153269
AM862	1H	96.5332	473572475	473642622	70147
AM863	1H	97.1284	473642623	473661883	19260
AM864	1H	97.1284	473661884	473716525	54641
AM865	1H	97.1284	473716526	474002870	286344
AM866	1H	97.1284	474002871	474096531	93660
AM867	1H	97.1284	474096532	474384099	287567
AM868	1H	97.1284	474384100	474396725	12625
AM869	1H	97.1284	474396726	474511545	114819
AM870	1H	97.1284	474511546	474762555	251009
AM871	1H	97.1284	474762556	474953038	190482
AM872	1H	97.1284	474953039	475153069	200030
AM873	1H	97.4333	475153070	475266775	113705
AM874	1H	97.7382	475266776	475317823	51047
AM875	1H	97.7382	475317824	475366503	48679
AM876	1H	97.7382	475366504	475384362	17858
AM877	1H	97.7382	475384363	475406559	22196
AM878	1H	97.7382	475406560	475568374	161814
AM879	1H	97.7382	475568375	475648554	80179
AM881	1H	98.0488	475648555	475654637	6082
AM882	1H	98.0488	475654638	476122903	468265
AM883	1H	98.0488	476122904	476228917	106013
AM880	1H	98.0488	476228918	476261707	32789
AM884	1H	98.0488	476261708	476362281	100573
AM885	1H	98.0488	476362282	476480237	117955
AM886	1H	98.6661	476480238	476641911	161673
AM887	1H	98.6661	476641912	476674381	32469
AM888	1H	98.971	476674382	476745617	71235
AM890	1H	99.2777	476745618	476753887	8269
AM889	1H	99.2777	476753888	477357695	603807
AM891	1H	99.2777	477357696	477442506	84810
AM892	1H	99.2777	477442507	477456294	13787
AM893	1H	99.2777	477456295	478258664	802369
AM894	1H	99.2777	478258665	478300503	41838
AM895	1H	99.2777	478300504	478382831	82327
AM896	1H	99.2777	478382832	478481024	98192
AM897	1H	99.2777	478481025	478680853	199828
AM898	1H	99.2777	478680854	478787374	106520
AM899	1H	99.2777	478787375	478917980	130605
AM900	1H	99.5826	478917981	479249040	331059
AM901	1H	99.5826	479249041	479362391	113350
AM902	1H	99.5826	479362392	479603405	241013
AM903	1H	99.8875	479603406	479627561	24155
AM904	1H	100.192	479627562	479644036	16474
AM905	1H	100.497	479644037	479700650	56613
AM906	1H	100.497	479700651	480154541	453890
AM907	1H	100.497	480154542	480178715	24173
AM910	1H	100.808	480178716	480499509	320793
AM911	1H	100.808	480499510	480823042	323532
AM909	1H	100.808	480823043	480996686	173643
AM912	1H	100.808	480996687	481141599	144912
AM908	1H	100.808	481141600	481218852	77252
AM913	1H	100.808	481218853	481229555	10702
AM914	1H	101.418	481229556	481263521	33965
AM915	1H	101.418	481263522	481401497	137975
AM916	1H	101.719	481401498	481529128	127630
AM918	1H	101.719	481529129	481597743	68614
AM917	1H	101.719	481597744	482066741	468997
AM919	1H	102.022	482066742	482072391	5649
AM920	1H	102.022	482072392	482200585	128193
AM921	1H	102.321	482200586	482335581	134995
AM922	1H	102.924	482335582	482380182	44600
AM923	1H	102.924	482380183	482602962	222779
AM924	1H	102.924	482602963	482770501	167538
AM927	1H	103.53	482770502	482894605	124103
AM929	1H	103.53	482894606	483025185	130579
AM925	1H	103.53	483025186	483286206	261020
AM926	1H	103.53	483286207	483468852	182645
AM928	1H	103.53	483468853	483602516	133663
AM930	1H	103.53	483602517	483766165	163648
AM934	1H	103.53	483766166	483840246	74080
AM931	1H	103.53	483840247	483862371	22124
AM932	1H	103.53	483862372	484510693	648321
AM933	1H	103.53	484510694	484564517	53823
AM935	1H	103.53	484564518	484573986	9468
AM936	1H	103.53	484573987	484620803	46816
AM937	1H	103.53	484620804	484833039	212235
AM938	1H	103.831	484833040	484998892	165852
AM939	1H	103.831	484998893	485016240	17347
AM941	1H	103.831	485016241	485058411	42170
AM940	1H	103.831	485058412	485147544	89132
AM942	1H	104.136	485147545	485271446	123901
AM943	1H	104.136	485271447	485381447	110000
AM944	1H	104.437	485381448	485464999	83551
AM945	1H	104.437	485465000	486278846	813846
AM946	1H	105.047	486278847	486587944	309097
AM947	1H	105.657	486587945	486630162	42217
AM948	1H	105.96	486630163	486701338	71175
AM949	1H	106.263	486701339	486764819	63480
AM950	1H	106.263	486764820	486859824	95004
AM951	1H	107.189	486859825	486924279	64454
AM952	1H	107.189	486924280	486996296	72016
AM953	1H	107.492	486996297	487070004	73707
AM955	1H	109.055	487070005	487234689	164684
AM954	1H	109.055	487234690	487513720	279030
AM956	1H	109.055	487513721	487523313	9592
AM957	1H	109.055	487523314	487607387	84073
AM958	1H	109.36	487607388	487705805	98417
AM959	1H	109.36	487705806	487931173	225367
AM960	1H	109.666	487931174	487985537	54363
AM961	1H	109.973	487985538	488224878	239340
AM962	1H	110.28	488224879	488232190	7311
AM963	1H	110.587	488232191	488633463	401272
AM964	1H	112.16	488633464	488994616	361152
AM965	1H	112.464	488994617	489087737	93120
AM966	1H	112.464	489087738	489133180	45442
AM967	1H	112.464	489133181	489171938	38757
AM968	1H	112.773	489171939	489235793	63854
AM969	1H	113.082	489235794	489398077	162283
AM970	1H	113.39	489398078	489691341	293263
AM971	1H	113.39	489691342	489833395	142053
AM972	1H	114.015	489833396	490324971	491575
AM973	1H	114.64	490324972	490347952	22980
AM974	1H	115.266	490347953	490417802	69849
AM975	1H	115.266	490417803	490447337	29534
AM976	1H	115.266	490447338	490470597	23259
AM977	1H	115.266	490470598	490504160	33562
AM978	1H	115.57	490504161	490511769	7608
AM979	1H	115.875	490511770	490742178	230408
AM980	1H	115.875	490742179	490773970	31791
AM981	1H	116.182	490773971	490824147	50176
AM982	1H	116.489	490824148	490966717	142569
AM983	1H	116.489	490966718	491030146	63428
AM984	1H	116.489	491030147	491206403	176256
AM985	1H	116.489	491206404	491218479	12075
AM986	1H	116.489	491218480	491260415	41935
AM987	1H	116.799	491260416	491317687	57271
AM988	1H	116.799	491317688	491379554	61866
AM989	1H	116.799	491379555	491392517	12962
AM990	1H	116.799	491392518	491751354	358836
AM991	1H	116.799	491751355	491769451	18096
AM992	1H	117.106	491769452	491804149	34697
AM993	1H	117.106	491804150	491908701	104551
AM994	1H	117.411	491908702	491914371	5669
AM995	1H	117.716	491914372	491940701	26329
AM997	1H	117.716	491940702	492038125	97423
AM996	1H	118.021	492038126	492198859	160733
AM998	1H	118.947	492198860	492340434	141574
AM999	1H	118.947	492340435	492702195	361760
AM1000	1H	118.947	492702196	492746672	44476
AM1001	1H	118.947	492746673	493431904	685231
AM1002	1H	120.189	493431905	493437366	5461
AM1003	1H	120.189	493437367	493550387	113020
AM1005	1H	120.189	493550388	493631392	81004
AM1004	1H	120.189	493631393	493741750	110357
AM1006	1H	120.498	493741751	493793548	51797
AM1007	1H	120.805	493793549	493870598	77049
AM1008	1H	120.805	493870599	494162349	291750
AM1009	1H	121.113	494162350	494235556	73206
AM1010	1H	121.113	494235557	494305470	69913
AM1011	1H	121.424	494305471	494640271	334800
AM1012	1H	121.734	494640272	494684136	43864
AM1013	1H	122.045	494684137	494842836	158699
AM1014	1H	122.045	494842837	495295915	453078
AM1015	1H	122.354	495295916	495324682	28766
AM1016	1H	122.975	495324683	495364730	40047
AM1017	1H	122.975	495364731	495472246	107515
AM1018	1H	123.281	495472247	495795819	323572
AM1019	1H	123.281	495795820	495855611	59791
AM1020	1H	123.59	495855612	495880585	24973
AM1021	1H	123.899	495880586	495918178	37592
AM1022	1H	123.899	495918179	496009172	90993
AM1023	1H	124.206	496009173	496102423	93250
AM1024	1H	124.206	496102424	496116451	14027
AM1025	1H	124.514	496116452	496185899	69447
AM1026	1H	124.514	496185900	496448707	262807
AM1027	1H	124.514	496448708	496482853	34145
AM1029	1H	125.132	496482854	496505273	22419
AM1028	1H	125.132	496505274	496677292	172018
AM1030	1H	125.132	496677293	496909440	232147
AM1031	1H	125.436	496909441	496968283	58842
AM1032	1H	125.741	496968284	497225573	257289
AM1033	1H	126.046	497225574	497520463	294889
AM1034	1H	126.046	497520464	497637989	117525
AM1035	1H	126.046	497637990	497795923	157933
AM1036	1H	126.046	497795924	497811506	15582
AM1037	1H	126.353	497811507	497881749	70242
AM1038	1H	126.353	497881750	497932132	50382
AM1039	1H	126.353	497932133	498098974	166841
AM1040	1H	126.656	498098975	498362709	263734
AM1041	1H	126.656	498362710	498422103	59393
AM1043	1H	126.656	498422104	498811910	389806
AM1042	1H	126.656	498811911	498999764	187853
AM1044	1H	126.656	498999765	499096883	97118
AM1045	1H	126.656	499096884	499141470	44586
AM1046	1H	126.967	499141471	499166968	25497
AM1047	1H	126.967	499166969	499265041	98072
AM1048	1H	126.967	499265042	499286840	21798
AM1049	1H	127.281	499286841	499314351	27510
AM1050	1H	127.281	499314352	499383221	68869
AM1051	1H	127.281	499383222	499707759	324537
AM1052	1H	127.281	499707760	499879127	171367
AM1053	1H	127.281	499879128	500172964	293836
AM1054	1H	127.592	500172965	500245341	72376
AM1055	1H	127.592	500245342	500455219	209877
AM1056	1H	127.592	500455220	500834001	378781
AM1057	1H	127.906	500834002	500932493	98491
AM1058	1H	127.906	500932494	501143471	210977
AM1059	1H	128.219	501143472	501380716	237244
AM1060	1H	128.219	501380717	501399689	18972
AM1061	1H	128.219	501399690	501557540	157850
AM1062	1H	128.219	501557541	501728106	170565
AM1063	1H	128.529	501728107	501819540	91433
AM1064	1H	128.529	501819541	501844178	24637
AM1065	1H	128.842	501844179	501931909	87730
AM1069	1H	128.842	501931910	502059396	127486
AM1070	1H	128.842	502059397	502141327	81930
AM1067	1H	128.842	502141328	502174456	33128
AM1066	1H	128.842	502174457	502521922	347465
AM1071	1H	128.842	502521923	502543305	21382
AM1068	1H	128.842	502543306	502631538	88232
AM1072	1H	128.842	502631539	502979244	347705
AM1073	1H	128.842	502979245	502989903	10658
AM1074	1H	128.842	502989904	503029783	39879
AM1075	1H	128.842	503029784	503168424	138640
AM1076	1H	128.842	503168425	503188501	20076
AM1077	1H	128.842	503188502	503238040	49538
AM1078	1H	128.842	503238041	503265626	27585
AM1079	1H	128.842	503265627	503322948	57321
AM1080	1H	128.842	503322949	503373590	50641
AM1081	1H	128.842	503373591	503435183	61592
AM1082	1H	129.467	503435184	503530323	95139
AM1083	1H	129.467	503530324	503560353	30029
AM1084	1H	129.777	503560354	503679688	119334
AM1085	1H	129.777	503679689	503703081	23392
AM1086	1H	130.402	503703082	503717489	14407
AM1087	1H	130.402	503717490	503955916	238426
AM1088	1H	130.402	503955917	504406441	450524
AM1089	1H	130.402	504406442	504680063	273621
AM1090	1H	130.711	504680064	504892509	212445
AM1091	1H	131.332	504892510	505144201	251691
AM1092	1H	131.641	505144202	505183236	39034
AM1093	1H	131.947	505183237	505281500	98263
AM1094	1H	132.254	505281501	505311813	30312
AM1095	1H	132.561	505311814	505339567	27753
AM1096	1H	132.868	505339568	505413066	73498
AM1097	1H	133.485	505413067	505456402	43335
AM1098	1H	133.485	505456403	505507632	51229
AM1099	1H	133.485	505507633	506039946	532313
AM1100	1H	133.485	506039947	506185897	145950
AM1101	1H	133.798	506185898	506222323	36425
AM1102	1H	134.11	506222324	506426068	203744
AM1103	1H	134.11	506426069	506462811	36742
AM1104	1H	134.421	506462812	506476364	13552
AM1105	1H	135.046	506476365	506498927	22562
AM1106	1H	135.356	506498928	506518816	19888
AM1107	1H	135.667	506518817	506524433	5616
AM1108	1H	135.977	506524434	506553588	29154
AM1109	1H	136.288	506553589	506654671	101082
AM1110	1H	136.288	506654672	506664728	10056
AM1111	1H	136.288	506664729	506756019	91290
AM1112	1H	136.602	506756020	506774238	18218
AM1113	1H	136.602	506774239	506830068	55829
AM1114	1H	136.602	506830069	506836474	6405
AM1115	1H	136.602	506836475	507035093	198618
AM1116	1H	136.602	507035094	507365123	330029
AM1117	1H	136.913	507365124	507735472	370348
AM1118	1H	136.913	507735473	507747198	11725
AM1119	1H	136.913	507747199	507900381	153182
AM1120	1H	136.913	507900382	508006251	105869
AM1121	1H	136.913	508006252	508065149	58897
AM1122	1H	137.22	508065150	508176864	111714
AM1123	1H	137.22	508176865	508200081	23216
AM1124	1H	137.528	508200082	508227988	27906
AM1125	1H	137.528	508227989	508293668	65679
AM1126	1H	137.837	508293669	508336993	43324
AM1127	1H	138.146	508336994	508357934	20940
AM1128	1H	138.146	508357935	508445335	87400
AM1129	1H	138.452	508445336	508741737	296401
AM1130	1H	138.757	508741738	509238757	497019
AM1131	1H	139.062	509238758	509259162	20404
AM1132	1H	139.367	509259163	509293290	34127
AM1133	1H	139.984	509293291	509801451	508160
AM1134	1H	140.293	509801452	509812893	11441
AM1135	1H	140.914	509812894	510005822	192928
AM1136	1H	140.914	510005823	510013823	8000
AM1137	1H	140.914	510013824	510050342	36518
AM1138	1H	140.914	510050343	510228224	177881
AM1139	1H	140.914	510228225	510296557	68332
AM1140	1H	140.914	510296558	510342876	46318
AM1141	1H	141.524	510342877	510481748	138871
AM1142	1H	141.827	510481749	510491252	9503
AM1143	1H	142.13	510491253	510500436	9183
AM1144	1H	142.13	510500437	511089038	588601
AM1145	1H	142.13	511089039	511633729	544690
AM1146	1H	142.13	511633730	511834686	200956
AM1147	1H	142.13	511834687	511866161	31474
AM1148	1H	142.74	511866162	511926151	59989
AM1149	1H	142.74	511926152	511960076	33924
AM1150	1H	143.041	511960077	512388564	428487
AM1151	1H	143.956	512388565	512556626	168061
AM1152	1H	143.956	512556627	512655410	98783
AM1153	1H	143.956	512655411	512808540	153129
AM1154	1H	143.956	512808541	512849871	41330
AM1155	1H	143.956	512849872	512934796	84924
AM1156	1H	143.956	512934797	513050368	115571
AM1157	1H	143.956	513050369	513217604	167235
AM1158	1H	143.956	513217605	513238136	20531
AM1159	1H	143.956	513238137	513342425	104288
AM1160	1H	143.956	513342426	513363994	21568
AM1161	1H	143.956	513363995	513762256	398261
AM1162	1H	143.956	513762257	513801818	39561
AM1163	1H	144.262	513801819	514251131	449312
AM1166	1H	144.262	514251132	514322336	71204
AM1164	1H	144.262	514322337	514716923	394586
AM1165	1H	144.262	514716924	514750822	33898
AM1167	1H	144.262	514750823	514762732	11909
AM1168	1H	144.262	514762733	514804229	41496
AM1169	1H	144.262	514804230	514830965	26735
AM1170	1H	144.262	514830966	515624425	793459
AM1171	1H	144.262	515624426	515717229	92803
AM1172	1H	144.262	515717230	515788924	71694
AM1173	1H	144.262	515788925	515852405	63480
AM1174	1H	144.262	515852406	516252315	399909
AM1175	1H	144.262	516252316	516436723	184407
BM3	2H	0	1	232051	232050
BM1	2H	0.3106	232052	305978	73926
BM2	2H	0.3106	305979	474888	168909
BM4	2H	0.3106	474889	600463	125574
BM5	2H	0.3106	600464	609861	9397
BM6	2H	0.9356	609862	1363827	753965
BM7	2H	0.9356	1363828	1535501	171673
BM8	2H	0.9356	1535502	1543832	8330
BM9	2H	0.9356	1543833	1552913	9080
BM10	2H	0.9356	1552914	1646844	93930
BM11	2H	0.9356	1646845	1670123	23278
BM12	2H	0.9356	1670124	1704448	34324
BM13	2H	0.9356	1704449	1766983	62534
BM14	2H	0.9356	1766984	1846559	79575
BM15	2H	0.9356	1846560	1862028	15468
BM16	2H	1.5567	1862029	1958233	96204
BM17	2H	1.5567	1958234	2250093	291859
BM18	2H	1.5567	2250094	2290231	40137
BM19	2H	1.5567	2290232	2512027	221795
BM20	2H	2.1818	2512028	2556489	44461
BM21	2H	2.1818	2556490	2848534	292044
BM22	2H	2.1818	2848535	2871623	23088
BM23	2H	2.1818	2871624	2884829	13205
BM24	2H	2.4943	2884830	3194922	310092
BM25	2H	2.8068	3194923	3205727	10804
BM26	2H	2.8068	3205728	3373082	167354
BM27	2H	2.8068	3373083	3580635	207552
BM28	2H	2.8068	3580636	3674785	94149
BM29	2H	3.1154	3674786	3689380	14594
BM30	2H	3.1154	3689381	3755050	65669
BM31	2H	3.1154	3755051	3829509	74458
BM32	2H	3.1154	3829510	3867434	37924
BM33	2H	3.1154	3867435	3900496	33061
BM34	2H	3.1154	3900497	3927395	26898
BM35	2H	3.1154	3927396	3939776	12380
BM37	2H	3.1154	3939777	4013086	73309
BM36	2H	3.1154	4013087	4212449	199362
BM38	2H	3.1154	4212450	4794149	581699
BM39	2H	3.4279	4794150	4834537	40387
BM40	2H	3.7404	4834538	5155945	321407
BM41	2H	3.7404	5155946	5296432	140486
BM42	2H	4.6839	5296433	5362840	66407
BM43	2H	4.6839	5362841	5379879	17038
BM44	2H	4.6839	5379880	5490890	111010
BM45	2H	4.9945	5490891	6193055	702164
BM46	2H	4.9945	6193056	8890471	2697415
BM47	2H	4.9945	8890472	8995910	105438
BM48	2H	5.307	8995911	9168412	172501
BM49	2H	5.6195	9168413	9551949	383536
BM50	2H	5.6195	9551950	9646002	94052
BM51	2H	5.6195	9646003	9706095	60092
BM52	2H	5.6195	9706096	10221331	515235
BM53	2H	5.6195	10221332	10354212	132880
BM54	2H	5.6195	10354213	10532632	178419
BM55	2H	5.6195	10532633	10643653	111020
BM56	2H	5.6195	10643654	10729236	85582
BM57	2H	6.2446	10729237	10794073	64836
BM58	2H	6.5551	10794074	10818112	24038
BM59	2H	6.8657	10818113	11019966	201853
BM60	2H	7.4907	11019967	11132137	112170
BM61	2H	7.4907	11132138	11569231	437093
BM62	2H	7.8032	11569232	11795772	226540
BM63	2H	7.8032	11795773	12045261	249488
BM64	2H	7.8032	12045262	12142416	97154
BM65	2H	8.1119	12142417	12164783	22366
BM66	2H	8.1119	12164784	12228838	64054
BM67	2H	8.1119	12228839	12241086	12247
BM68	2H	8.4205	12241087	12637994	396907
BM69	2H	8.4205	12637995	12650223	12228
BM70	2H	8.4205	12650224	12791708	141484
BM71	2H	8.4205	12791709	12868653	76944
BM72	2H	8.7235	12868654	12886448	17794
BM73	2H	8.7235	12886449	13026402	139953
BM74	2H	8.7235	13026403	13340923	314520
BM75	2H	8.7235	13340924	13814287	473363
BM76	2H	9.0248	13814288	13939524	125236
BM77	2H	9.326	13939525	13950678	11153
BM78	2H	9.326	13950679	14687664	736985
BM79	2H	9.629	14687665	14736136	48471
BM80	2H	9.932	14736137	14992780	256643
BM81	2H	10.2351	14992781	15361894	369113
BM82	2H	10.2351	15361895	15400487	38592
BM83	2H	10.5363	15400488	17437414	2036926
BM84	2H	10.5363	17437415	17794963	357548
BM85	2H	10.8357	17794964	17983222	188258
BM86	2H	14.0045	17983223	18143593	160370
BM87	2H	14.0045	18143594	18151511	7917
BM88	2H	14.6033	18151512	18157065	5553
BM89	2H	14.9009	18157066	18246888	89822
BM90	2H	15.2003	18246889	18260267	13378
BM91	2H	15.4997	18260268	18428096	167828
BM92	2H	15.4997	18428097	18845701	417604
BM93	2H	15.4997	18845702	19006904	161202
BM94	2H	15.4997	19006905	19020455	13550
BM95	2H	15.4997	19020456	19164027	143571
BM96	2H	15.4997	19164028	19193071	29043
BM97	2H	15.4997	19193072	19226689	33617
BM98	2H	15.8046	19226690	19260085	33395
BM99	2H	16.1095	19260086	19265955	5869
BM100	2H	16.4144	19265956	19274516	8560
BM101	2H	16.7193	19274517	19300284	25767
BM102	2H	16.7193	19300285	19376104	75819
BM103	2H	17.329	19376105	19410902	34797
BM104	2H	17.329	19410903	19577824	166921
BM105	2H	17.6303	19577825	19608967	31142
BM106	2H	17.9297	19608968	19836049	227081
BM107	2H	17.9297	19836050	19877756	41706
BM108	2H	18.2309	19877757	19954818	77061
BM109	2H	18.5321	19954819	20026867	72048
BM110	2H	18.8333	20026868	21034010	1007142
BM111	2H	18.8333	21034011	21146500	112489
BM112	2H	18.8333	21146501	21275419	128918
BM113	2H	19.1345	21275420	21285590	10170
BM114	2H	19.1345	21285591	21441247	155656
BM115	2H	19.1345	21441248	21632897	191649
BM116	2H	19.1345	21632898	21984826	351928
BM117	2H	19.4375	21984827	22011582	26755
BM118	2H	19.7406	22011583	22017318	5735
BM119	2H	20.6609	22017319	22225376	208057
BM120	2H	20.6609	22225377	22237094	11717
BM121	2H	20.6609	22237095	22280908	43813
BM122	2H	21.267	22280909	22287793	6884
BM123	2H	21.267	22287794	22686766	398972
BM124	2H	21.267	22686767	22744206	57439
BM125	2H	21.267	22744207	23320568	576361
BM126	2H	21.267	23320569	23339658	19089
BM127	2H	21.57	23339659	23377237	37578
BM128	2H	22.1798	23377238	23388232	10994
BM129	2H	22.4829	23388233	23443581	55348
BM130	2H	22.4829	23443582	23583718	140136
BM131	2H	22.7841	23583719	23610117	26398
BM132	2H	22.7841	23610118	24278264	668146
BM133	2H	22.7841	24278265	24612050	333785
BM134	2H	22.7841	24612051	24729474	117423
BM135	2H	22.7841	24729475	25031978	302503
BM136	2H	23.0871	25031979	25081658	49679
BM137	2H	23.3901	25081659	25167519	85860
BM138	2H	23.9999	25167520	25225513	57993
BM139	2H	23.9999	25225514	25268522	43008
BM140	2H	24.3011	25268523	25465408	196885
BM141	2H	24.6023	25465409	25620075	154666
BM142	2H	24.6023	25620076	25655283	35207
BM143	2H	24.6023	25655284	25688732	33448
BM144	2H	24.9	25688733	25756844	68111
BM145	2H	24.9	25756845	25823822	66977
BM146	2H	25.1958	25823823	25843482	19659
BM147	2H	25.1958	25843483	25886475	42992
BM148	2H	25.1958	25886476	25990325	103849
BM149	2H	25.4952	25990326	26005761	15435
BM150	2H	25.7946	26005762	26046876	41114
BM151	2H	25.7946	26046877	26114265	67388
BM152	2H	25.7946	26114266	26209905	95639
BM153	2H	25.7946	26209906	26215831	5925
BM154	2H	26.0922	26215832	26280157	64325
BM155	2H	26.6947	26280158	26316426	36268
BM156	2H	26.9941	26316427	26386293	69866
BM157	2H	27.2935	26386294	26471070	84776
BM158	2H	28.5207	26471071	27194491	723420
BM159	2H	28.5207	27194492	27309248	114756
BM160	2H	28.8238	27309249	27316786	7537
BM161	2H	29.4335	27316787	27730498	413711
BM162	2H	29.4335	27730499	27987914	257415
BM163	2H	29.4335	27987915	27993226	5311
BM164	2H	29.7403	27993227	28070747	77520
BM165	2H	30.0471	28070748	28210707	139959
BM166	2H	30.3538	28210708	28223404	12696
BM167	2H	30.6606	28223405	29399121	1175716
BM168	2H	30.6606	29399122	29979429	580307
BM169	2H	31.2817	29979430	30013348	33918
BM170	2H	31.5923	30013349	30141480	128131
BM171	2H	31.5923	30141481	30473056	331575
BM172	2H	31.5923	30473057	30620744	147687
BM173	2H	31.5923	30620745	30646175	25430
BM174	2H	31.5923	30646176	30734927	88751
BM175	2H	31.5923	30734928	30800677	65749
BM176	2H	31.5923	30800678	31367310	566632
BM177	2H	31.5923	31367311	31499475	132164
BM178	2H	31.5923	31499476	31549202	49726
BM179	2H	31.5923	31549203	31705925	156722
BM180	2H	31.8971	31705926	31717368	11442
BM181	2H	32.202	31717369	31771583	54214
BM182	2H	32.5069	31771584	31795297	23713
BM185	2H	32.8137	31795298	31923907	128609
BM184	2H	32.8137	31923908	31969738	45830
BM186	2H	32.8137	31969739	32141920	172181
BM183	2H	32.8137	32141921	32256102	114181
BM187	2H	32.8137	32256103	32961370	705267
BM188	2H	32.8137	32961371	33115754	154383
BM189	2H	33.1204	33115755	33136886	21131
BM190	2H	33.4272	33136887	33176408	39521
BM193	2H	34.0522	33176409	33295387	118978
BM192	2H	34.0522	33295388	33359988	64600
BM194	2H	34.3608	33359989	33627469	267480
BM191	2H	34.3608	33627470	33644008	16538
BM195	2H	34.3608	33644009	33999181	355172
BM196	2H	34.6676	33999182	34033209	34027
BM197	2H	34.6676	34033210	34173744	140534
BM198	2H	34.6676	34173745	34208778	35033
BM199	2H	34.9743	34208779	34285826	77047
BM200	2H	34.9743	34285827	34292310	6483
BM201	2H	34.9743	34292311	34317981	25670
BM202	2H	35.2811	34317982	34546933	228951
BM203	2H	35.5879	34546934	34564592	17658
BM205	2H	35.5879	34564593	34643021	78428
BM206	2H	35.5879	34643022	34891033	248011
BM207	2H	35.5879	34891034	34942633	51599
BM208	2H	35.5879	34942634	34962202	19568
BM209	2H	35.5879	34962203	34984128	21925
BM204	2H	35.5879	34984129	35025981	41852
BM210	2H	35.5879	35025982	35172567	146585
BM211	2H	35.5879	35172568	35459982	287414
BM212	2H	35.5879	35459983	35490660	30677
BM214	2H	35.5879	35490661	35571796	81135
BM215	2H	35.5879	35571797	35613279	41482
BM216	2H	35.5879	35613280	35642756	29476
BM213	2H	35.5879	35642757	35808688	165931
BM217	2H	35.8965	35808689	35971634	162945
BM218	2H	35.8965	35971635	36173239	201604
BM219	2H	35.8965	36173240	36206272	33032
BM220	2H	35.8965	36206273	36265056	58783
BM221	2H	35.8965	36265057	36346399	81342
BM222	2H	36.5138	36346400	36458796	112396
BM223	2H	36.8206	36458797	36486232	27435
BM224	2H	37.1273	36486233	36512276	26043
BM225	2H	37.1273	36512277	36731362	219085
BM226	2H	37.1273	36731363	36868805	137442
BM227	2H	37.4322	36868806	37056845	188039
BM228	2H	37.4322	37056846	37091373	34527
BM229	2H	37.7389	37091374	37575658	484284
BM232	2H	38.0476	37575659	37599133	23474
BM231	2H	38.0476	37599134	37607748	8614
BM233	2H	38.0476	37607749	37669580	61831
BM230	2H	38.0476	37669581	38227651	558070
BM234	2H	38.0476	38227652	38349337	121685
BM236	2H	38.0476	38349338	38503089	153751
BM237	2H	38.0476	38503090	38729803	226713
BM238	2H	38.0476	38729804	38819625	89821
BM235	2H	38.0476	38819626	38853575	33949
BM239	2H	38.0476	38853576	39122550	268974
BM240	2H	38.0476	39122551	39802047	679496
BM241	2H	38.0476	39802048	40207807	405759
BM242	2H	38.0476	40207808	40300379	92571
BM243	2H	38.3506	40300380	40385572	85192
BM244	2H	38.6537	40385573	40391761	6188
BM245	2H	38.9567	40391762	40481448	89686
BM246	2H	38.9567	40481449	40899528	418079
BM247	2H	39.5702	40899529	40910478	10949
BM248	2H	40.1838	40910479	41004820	94341
BM249	2H	40.4886	41004821	41011866	7045
BM250	2H	40.4886	41011867	41018488	6621
BM251	2H	40.7917	41018489	41026347	7858
BM253	2H	41.4052	41026348	41048786	22438
BM252	2H	41.4052	41048787	41183533	134746
BM254	2H	41.4052	41183534	41506339	322805
BM255	2H	41.7082	41506340	41668962	162622
BM256	2H	41.7082	41668963	41710568	41605
BM257	2H	41.7082	41710569	41795901	85332
BM258	2H	42.0113	41795902	42261655	465753
BM259	2H	42.3125	42261656	42303521	41865
BM260	2H	42.3125	42303522	42312660	9138
BM261	2H	42.3125	42312661	43053820	741159
BM262	2H	42.6137	43053821	43631636	577815
BM263	2H	43.2161	43631637	43736210	104573
BM264	2H	43.2161	43736211	43803645	67434
BM265	2H	43.5137	43803646	45014760	1211114
BM266	2H	44.4175	45014761	45132313	117552
BM267	2H	44.4175	45132314	45148148	15834
BM268	2H	44.4175	45148149	45334796	186647
BM269	2H	44.4175	45334797	45384336	49539
BM270	2H	45.0199	45384337	45553318	168981
BM271	2H	45.3193	45553319	46594732	1041413
BM272	2H	45.6187	46594733	46608705	13972
BM273	2H	45.6187	46608706	46717671	108965
BM274	2H	45.9163	46717672	46953588	235916
BM275	2H	46.214	46953589	47206280	252691
BM276	2H	46.214	47206281	47397482	191201
BM278	2H	46.214	47397483	47545060	147577
BM279	2H	46.214	47545061	47799518	254457
BM280	2H	46.214	47799519	47866671	67152
BM277	2H	46.214	47866672	48404242	537570
BM281	2H	46.5134	48404243	48712436	308193
BM282	2H	46.8128	48712437	48971848	259411
BM283	2H	46.8128	48971849	48989577	17728
BM284	2H	47.1158	48989578	49017743	28165
BM286	2H	47.7256	49017744	49222179	204435
BM287	2H	47.7256	49222180	49331862	109682
BM285	2H	48.0286	49331863	49800052	468189
BM288	2H	48.0286	49800053	49951939	151886
BM289	2H	48.0286	49951940	49973209	21269
BM290	2H	48.0286	49973210	50191834	218624
BM291	2H	48.0286	50191835	50338758	146923
BM292	2H	48.3316	50338759	50391602	52843
BM293	2H	48.3316	50391603	50401704	10101
BM294	2H	48.3316	50401705	51445733	1044028
BM295	2H	48.6347	51445734	51631742	186008
BM296	2H	48.9377	51631743	52129893	498150
BM297	2H	49.2407	52129894	52559917	430023
BM298	2H	49.8543	52559918	52694136	134218
BM299	2H	49.8543	52694137	53035008	340871
BM300	2H	50.161	53035009	53280191	245182
BM301	2H	50.161	53280192	54382875	1102683
BM302	2H	50.4697	54382876	54716923	334047
BM303	2H	50.4697	54716924	54860043	143119
BM304	2H	50.4697	54860044	54882293	22249
BM305	2H	50.4697	54882294	55254949	372655
BM306	2H	50.4697	55254950	55349878	94928
BM307	2H	50.4697	55349879	55631534	281655
BM308	2H	50.4697	55631535	55795223	163688
BM309	2H	50.4697	55795224	55911494	116270
BM310	2H	50.7746	55911495	55917651	6156
BM311	2H	50.7746	55917652	55934076	16424
BM312	2H	51.0776	55934077	56000718	66641
BM313	2H	51.0776	56000719	56006139	5420
BM315	2H	51.0776	56006140	56071585	65445
BM314	2H	51.0776	56071586	56104634	33048
BM317	2H	51.0776	56104635	56251714	147079
BM316	2H	51.0776	56251715	56507039	255324
BM318	2H	51.0776	56507040	56527705	20665
BM319	2H	51.0776	56527706	56532866	5160
BM320	2H	51.0776	56532867	56559232	26365
BM321	2H	51.6837	56559233	56758876	199643
BM322	2H	51.6837	56758877	56777597	18720
BM323	2H	51.6837	56777598	56872241	94643
BM324	2H	51.6837	56872242	56901105	28863
BM329	2H	51.6837	56901106	56946550	45444
BM328	2H	51.6837	56946551	57028955	82404
BM327	2H	51.6837	57028956	57106156	77200
BM326	2H	51.6837	57106157	57118082	11925
BM325	2H	51.6837	57118083	57251569	133486
BM330	2H	51.6837	57251570	57806295	554725
BM331	2H	51.9849	57806296	57930597	124301
BM334	2H	52.2879	57930598	58171951	241353
BM333	2H	52.2879	58171952	58287999	116047
BM335	2H	52.2879	58288000	58751465	463465
BM332	2H	52.2879	58751466	58765885	14419
BM336	2H	52.2879	58765886	58801971	36085
BM337	2H	52.5873	58801972	59227944	425972
BM338	2H	52.8867	59227945	59288522	60577
BM339	2H	53.1879	59288523	59310408	21885
BM340	2H	53.1879	59310409	59446328	135919
BM341	2H	53.1879	59446329	59529570	83241
BM343	2H	53.1879	59529571	59610797	81226
BM342	2H	53.1879	59610798	59936669	325871
BM344	2H	53.1879	59936670	59977649	40979
BM345	2H	53.1879	59977650	60721283	743633
BM346	2H	53.4873	60721284	60762046	40762
BM347	2H	53.4873	60762047	60955750	193703
BM348	2H	53.7886	60955751	61079633	123882
BM349	2H	53.7886	61079634	61160524	80890
BM350	2H	53.7886	61160525	61536953	376428
BM351	2H	53.7886	61536954	61624245	87291
BM352	2H	54.088	61624246	61696128	71882
BM353	2H	54.3874	61696129	62022258	326129
BM354	2H	54.3874	62022259	62126493	104234
BM355	2H	54.6886	62126494	62161715	35221
BM356	2H	54.9898	62161716	62189559	27843
BM358	2H	54.9898	62189560	62457036	267476
BM357	2H	54.9898	62457037	62547494	90457
BM359	2H	55.5996	62547495	62553515	6020
BM360	2H	55.9008	62553516	62725687	172171
BM361	2H	55.9008	62725688	62840551	114863
BM362	2H	56.2038	62840552	63333649	493097
BM364	2H	56.2038	63333650	63482572	148922
BM363	2H	56.2038	63482573	63523713	41140
BM365	2H	56.8136	63523714	63532391	8677
BM366	2H	57.1166	63532392	63802595	270203
BM367	2H	57.4197	63802596	63808294	5698
BM368	2H	57.7227	63808295	63823822	15527
BM369	2H	57.7227	63823823	63943500	119677
BM370	2H	57.7227	63943501	64709400	765899
BM372	2H	57.7227	64709401	65014068	304667
BM374	2H	57.7227	65014069	65822604	808535
BM371	2H	57.7227	65822605	66061524	238919
BM373	2H	57.7227	66061525	66123178	61653
BM375	2H	58.0239	66123179	66200640	77461
BM377	2H	58.0239	66200641	66358740	158099
BM379	2H	58.0239	66358741	66587318	228577
BM376	2H	58.0239	66587319	66768635	181316
BM378	2H	58.0239	66768636	66927746	159110
BM380	2H	58.3251	66927747	67376286	448539
BM381	2H	58.3251	67376287	67700510	324223
BM382	2H	58.3251	67700511	67716085	15574
BM383	2H	58.3251	67716086	67743477	27391
BM384	2H	58.3251	67743478	67883764	140286
BM388	2H	58.9387	67883765	68012528	128763
BM385	2H	58.9387	68012529	68176338	163809
BM386	2H	58.9387	68176339	68279995	103656
BM387	2H	58.9387	68279996	68355107	75111
BM389	2H	58.9387	68355108	68539757	184649
BM393	2H	58.9387	68539758	68556442	16684
BM390	2H	58.9387	68556443	68628846	72403
BM391	2H	58.9387	68628847	68691058	62211
BM392	2H	58.9387	68691059	68857534	166475
BM394	2H	59.5522	68857535	68888209	30674
BM395	2H	59.5522	68888210	68967579	79369
BM396	2H	59.5522	68967580	68973254	5674
BM397	2H	59.5522	68973255	69140974	167719
BM400	2H	59.8534	69140975	69240716	99741
BM399	2H	59.8534	69240717	69280202	39485
BM401	2H	59.8534	69280203	69774218	494015
BM398	2H	59.8534	69774219	70000306	226087
BM402	2H	59.8534	70000307	77976284	7975977
BM403	2H	59.8534	77976285	78753167	776882
BM404	2H	60.151	78753168	79189246	436078
BM405	2H	60.4486	79189247	79648364	459117
BM406	2H	60.4486	79648365	80131223	482858
BM407	2H	60.4486	80131224	81532474	1401250
BM410	2H	60.4486	81532475	81671736	139261
BM408	2H	60.4486	81671737	81699886	28149
BM409	2H	60.4486	81699887	81932804	232917
BM411	2H	60.7463	81932805	82071854	139049
BM412	2H	60.7463	82071855	82315514	243659
BM413	2H	60.7463	82315515	82365076	49561
BM414	2H	61.3451	82365077	82415155	50078
BM415	2H	61.3451	82415156	82476836	61680
BM416	2H	61.3451	82476837	82489842	13005
BM417	2H	61.3451	82489843	82591657	101814
BM419	2H	61.3451	82591658	83562549	970891
BM423	2H	61.3451	83562550	83644590	82040
BM420	2H	61.3451	83644591	83760157	115566
BM421	2H	61.3451	83760158	83919144	158986
BM418	2H	61.3451	83919145	84189588	270443
BM422	2H	61.3451	84189589	84314680	125091
BM424	2H	61.3451	84314681	84522931	208250
BM429	2H	61.3451	84522932	84549505	26573
BM426	2H	61.3451	84549506	84628410	78904
BM425	2H	61.3451	84628411	84647628	19217
BM427	2H	61.3451	84647629	84665313	17684
BM428	2H	61.3451	84665314	85031872	366558
BM430	2H	61.3451	85031873	85116168	84295
BM432	2H	61.3451	85116169	85180396	64227
BM431	2H	61.3451	85180397	85442803	262406
BM433	2H	61.3451	85442804	85502432	59628
BM434	2H	61.3451	85502433	85595432	92999
BM435	2H	61.3451	85595433	85641989	46556
BM436	2H	61.3451	85641990	85742169	100179
BM437	2H	61.3451	85742170	85891140	148970
BM438	2H	61.3451	85891141	85944097	52956
BM439	2H	61.3451	85944098	86077833	133735
BM440	2H	61.3451	86077834	86205065	127231
BM441	2H	61.3451	86205066	86310099	105033
BM442	2H	61.3451	86310100	86736909	426809
BM443	2H	61.3451	86736910	86765620	28710
BM447	2H	61.3451	86765621	86829937	64316
BM444	2H	61.3451	86829938	86885046	55108
BM448	2H	61.3451	86885047	87034475	149428
BM445	2H	61.3451	87034476	87387813	353337
BM446	2H	61.3451	87387814	87482673	94859
BM450	2H	61.3451	87482674	87653037	170363
BM449	2H	61.3451	87653038	87762863	109825
BM451	2H	61.3451	87762864	87797752	34888
BM455	2H	61.3451	87797753	88138130	340377
BM456	2H	61.3451	88138131	88300490	162359
BM457	2H	61.3451	88300491	88333718	33227
BM459	2H	61.3451	88333719	88440624	106905
BM452	2H	61.3451	88440625	88585416	144791
BM454	2H	61.3451	88585417	88605144	19727
BM458	2H	61.3451	88605145	88845989	240844
BM453	2H	61.3451	88845990	89279783	433793
BM460	2H	61.3451	89279784	89407397	127613
BM462	2H	61.3451	89407398	89472065	64667
BM466	2H	61.3451	89472066	89708048	235982
BM461	2H	61.3451	89708049	89757649	49600
BM465	2H	61.3451	89757650	89821426	63776
BM464	2H	61.3451	89821427	89880007	58580
BM468	2H	61.3451	89880008	89904860	24852
BM463	2H	61.3451	89904861	89995936	91075
BM467	2H	61.3451	89995937	90078669	82732
BM469	2H	61.3451	90078670	90788256	709586
BM471	2H	61.3451	90788257	90865460	77203
BM470	2H	61.3451	90865461	90949253	83792
BM474	2H	61.3451	90949254	90966829	17575
BM473	2H	61.3451	90966830	91016714	49884
BM475	2H	61.3451	91016715	91149468	132753
BM472	2H	61.3451	91149469	91269621	120152
BM476	2H	61.3451	91269622	91344338	74716
BM477	2H	61.6427	91344339	91571514	227175
BM480	2H	61.9421	91571515	91607778	36263
BM479	2H	61.9421	91607779	91659724	51945
BM481	2H	61.9421	91659725	91760394	100669
BM485	2H	61.9421	91760395	91843462	83067
BM478	2H	61.9421	91843463	91955540	112077
BM482	2H	61.9421	91955541	92044255	88714
BM483	2H	61.9421	92044256	92220885	176629
BM484	2H	61.9421	92220886	92288218	67332
BM486	2H	61.9421	92288219	92487798	199579
BM489	2H	61.9421	92487799	92553883	66084
BM490	2H	61.9421	92553884	92722225	168341
BM488	2H	61.9421	92722226	93002423	280197
BM487	2H	61.9421	93002424	93062860	60436
BM493	2H	61.9421	93062861	93192293	129432
BM492	2H	61.9421	93192294	93225565	33271
BM491	2H	61.9421	93225566	93235145	9579
BM494	2H	61.9421	93235146	93370110	134964
BM495	2H	62.238	93370111	93418180	48069
BM496	2H	62.238	93418181	94435092	1016911
BM497	2H	62.5338	94435093	94917628	482535
BM499	2H	62.5338	94917629	95268408	350779
BM498	2H	62.5338	95268409	95388531	120122
BM502	2H	62.8332	95388532	95523043	134511
BM501	2H	62.8332	95523044	95638518	115474
BM500	2H	62.8332	95638519	95711285	72766
BM503	2H	62.8332	95711286	95790900	79614
BM504	2H	63.1309	95790901	95866809	75908
BM505	2H	63.1309	95866810	95924883	58073
BM506	2H	63.1309	95924884	95964508	39624
BM507	2H	63.1309	95964509	96109004	144495
BM508	2H	63.4285	96109005	96193755	84750
BM509	2H	63.4285	96193756	96213870	20114
BM510	2H	63.4285	96213871	96265331	51460
BM515	2H	63.4285	96265332	96343900	78568
BM514	2H	63.4285	96343901	96361911	18010
BM513	2H	63.4285	96361912	96379280	17368
BM517	2H	63.4285	96379281	96473828	94547
BM512	2H	63.4285	96473829	96481048	7219
BM516	2H	63.4285	96481049	96543820	62771
BM511	2H	63.4285	96543821	96610947	67126
BM522	2H	63.7261	96610948	96753567	142619
BM521	2H	63.7261	96753568	96763380	9812
BM520	2H	63.7261	96763381	96779783	16402
BM518	2H	63.7261	96779784	97033318	253534
BM519	2H	63.7261	97033319	97140947	107628
BM523	2H	63.7261	97140948	97269544	128596
BM527	2H	63.7261	97269545	97288418	18873
BM528	2H	63.7261	97288419	97444449	156030
BM530	2H	63.7261	97444450	97480273	35823
BM524	2H	63.7261	97480274	97491329	11055
BM525	2H	63.7261	97491330	97618726	127396
BM526	2H	63.7261	97618727	98802761	1184034
BM529	2H	63.7261	98802762	101985831	3183069
BM531	2H	63.7261	101985832	101992835	7003
BM532	2H	63.7261	101992836	102026497	33661
BM533	2H	63.7261	102026498	102076709	50211
BM534	2H	64.022	102076710	102106616	29906
BM535	2H	64.022	102106617	102115392	8775
BM536	2H	64.022	102115393	102210890	95497
BM537	2H	64.3178	102210891	102236128	25237
BM538	2H	64.6137	102236129	102257552	21423
BM539	2H	64.9095	102257553	102279264	21711
BM540	2H	65.2054	102279265	102350808	71543
BM541	2H	65.2054	102350809	102475259	124450
BM542	2H	65.2054	102475260	102504508	29248
BM543	2H	65.5013	102504509	102966500	461991
BM545	2H	65.7971	102966501	103177010	210509
BM546	2H	65.7971	103177011	103455655	278644
BM547	2H	65.7971	103455656	103511401	55745
BM544	2H	65.7971	103511402	103549886	38484
BM548	2H	65.7971	103549887	103968800	418913
BM549	2H	65.7971	103968801	104345951	377150
BM550	2H	65.7971	104345952	104764655	418703
BM551	2H	65.7971	104764656	104801523	36867
BM552	2H	65.7971	104801524	104902503	100979
BM553	2H	65.7971	104902504	104912305	9801
BM554	2H	65.7971	104912306	104951427	39121
BM558	2H	65.7971	104951428	104993711	42283
BM555	2H	65.7971	104993712	105048145	54433
BM557	2H	65.7971	105048146	105125774	77628
BM559	2H	65.7971	105125775	105304671	178896
BM556	2H	65.7971	105304672	105325220	20548
BM560	2H	65.7971	105325221	105373389	48168
BM561	2H	65.7971	105373390	105421655	48265
BM562	2H	65.7971	105421656	105665636	243980
BM564	2H	65.7971	105665637	105685111	19474
BM565	2H	65.7971	105685112	105736300	51188
BM566	2H	65.7971	105736301	105790113	53812
BM567	2H	65.7971	105790114	105840230	50116
BM563	2H	65.7971	105840231	105880164	39933
BM568	2H	65.7971	105880165	105931841	51676
BM569	2H	65.7971	105931842	105957501	25659
BM570	2H	65.7971	105957502	105977577	20075
BM571	2H	65.7971	105977578	106027498	49920
BM572	2H	65.7971	106027499	106059339	31840
BM573	2H	65.7971	106059340	106091280	31940
BM574	2H	65.7971	106091281	106137217	45936
BM575	2H	65.7971	106137218	106146850	9632
BM576	2H	65.7971	106146851	106189337	42486
BM577	2H	65.7971	106189338	106243747	54409
BM578	2H	65.7971	106243748	106379721	135973
BM579	2H	65.7971	106379722	106532783	153061
BM581	2H	65.7971	106532784	106609981	77197
BM580	2H	65.7971	106609982	106710595	100613
BM582	2H	65.7971	106710596	106805527	94931
BM583	2H	65.7971	106805528	106939634	134106
BM584	2H	65.7971	106939635	106947862	8227
BM585	2H	65.7971	106947863	107028637	80774
BM586	2H	65.7971	107028638	107121507	92869
BM587	2H	65.7971	107121508	107127578	6070
BM588	2H	65.7971	107127579	107260832	133253
BM589	2H	65.7971	107260833	107343260	82427
BM590	2H	65.7971	107343261	107363876	20615
BM591	2H	65.7971	107363877	107396962	33085
BM592	2H	65.7971	107396963	107453728	56765
BM593	2H	65.7971	107453729	107481556	27827
BM594	2H	65.7971	107481557	107490960	9403
BM595	2H	65.7971	107490961	107575851	84890
BM596	2H	65.7971	107575852	107600381	24529
BM597	2H	65.7971	107600382	107613361	12979
BM599	2H	65.7971	107613362	107685173	71811
BM598	2H	65.7971	107685174	107849545	164371
BM600	2H	65.7971	107849546	108096180	246634
BM601	2H	65.7971	108096181	108193338	97157
BM602	2H	65.7971	108193339	108226947	33608
BM603	2H	65.7971	108226948	108286423	59475
BM604	2H	65.7971	108286424	108357278	70854
BM605	2H	65.7971	108357279	108365216	7937
BM609	2H	65.7971	108365217	108420818	55601
BM606	2H	65.7971	108420819	108442870	22051
BM607	2H	65.7971	108442871	108481672	38801
BM608	2H	65.7971	108481673	108621022	139349
BM610	2H	65.7971	108621023	108634601	13578
BM611	2H	66.3996	108634602	108723678	89076
BM612	2H	66.9984	108723679	108823406	99727
BM614	2H	66.9984	108823407	108901007	77600
BM613	2H	66.9984	108901008	108958354	57346
BM615	2H	66.9984	108958355	109006352	47997
BM616	2H	66.9984	109006353	109242421	236068
BM619	2H	66.9984	109242422	109383253	140831
BM621	2H	66.9984	109383254	109669413	286159
BM618	2H	66.9984	109669414	109727882	58468
BM617	2H	66.9984	109727883	109814266	86383
BM620	2H	66.9984	109814267	109943358	129091
BM622	2H	66.9984	109943359	110081946	138587
BM623	2H	66.9984	110081947	110168392	86445
BM624	2H	66.9984	110168393	110213688	45295
BM625	2H	66.9984	110213689	110353766	140077
BM626	2H	66.9984	110353767	110493136	139369
BM627	2H	66.9984	110493137	110513825	20688
BM628	2H	66.9984	110513826	110616926	103100
BM629	2H	66.9984	110616927	110625604	8677
BM630	2H	66.9984	110625605	110818054	192449
BM631	2H	66.9984	110818055	110914183	96128
BM632	2H	66.9984	110914184	110931941	17757
BM633	2H	67.2943	110931942	113285353	2353411
BM634	2H	67.2943	113285354	114573410	1288056
BM636	2H	67.2943	114573411	116991812	2418401
BM635	2H	67.2943	116991813	119767002	2775189
BM637	2H	67.5937	119767003	120492236	725233
BM638	2H	67.5937	120492237	121996538	1504301
BM639	2H	67.5937	121996539	123645620	1649081
BM640	2H	67.5937	123645621	124154372	508751
BM641	2H	67.5937	124154373	126795305	2640932
BM643	2H	67.5937	126795306	127772885	977579
BM645	2H	67.5937	127772886	127824268	51382
BM647	2H	67.5937	127824269	127929977	105708
BM649	2H	67.5937	127929978	128044116	114138
BM642	2H	67.5937	128044117	128110992	66875
BM644	2H	67.5937	128110993	128375264	264271
BM646	2H	67.5937	128375265	129060094	684829
BM648	2H	67.5937	129060095	129201435	141340
BM650	2H	67.5937	129201436	129870929	669493
BM652	2H	67.5937	129870930	129986214	115284
BM653	2H	67.5937	129986215	130389370	403155
BM655	2H	67.5937	130389371	130473503	84132
BM657	2H	67.5937	130473504	130562609	89105
BM651	2H	67.5937	130562610	131170337	607727
BM654	2H	67.5937	131170338	131564396	394058
BM656	2H	67.5937	131564397	132447458	883061
BM661	2H	67.5937	132447459	132472194	24735
BM663	2H	67.5937	132472195	132540791	68596
BM658	2H	67.5937	132540792	132720948	180156
BM659	2H	67.5937	132720949	133038489	317540
BM660	2H	67.5937	133038490	133173701	135211
BM662	2H	67.5937	133173702	133242789	69087
BM664	2H	67.5937	133242790	133418845	176055
BM666	2H	67.5937	133418846	133466910	48064
BM668	2H	67.5937	133466911	135285744	1818833
BM669	2H	67.5937	135285745	135390025	104280
BM670	2H	67.5937	135390026	136432223	1042197
BM672	2H	67.5937	136432224	137714539	1282315
BM665	2H	67.5937	137714540	142778251	5063711
BM667	2H	67.5937	142778252	143092776	314524
BM671	2H	67.5937	143092777	145482084	2389307
BM673	2H	67.5937	145482085	145661822	179737
BM674	2H	67.5937	145661823	145965049	303226
BM675	2H	67.5937	145965050	146324215	359165
BM676	2H	67.5937	146324216	147023668	699452
BM677	2H	67.8931	147023669	147266160	242491
BM678	2H	67.8931	147266161	147480033	213872
BM679	2H	67.8931	147480034	147945916	465882
BM681	2H	67.8931	147945917	148121778	175861
BM680	2H	67.8931	148121779	148154799	33020
BM682	2H	67.8931	148154800	148372255	217455
BM683	2H	67.8931	148372256	148451105	78849
BM684	2H	67.8931	148451106	148768548	317442
BM685	2H	67.8931	148768549	151034463	2265914
BM689	2H	67.8931	151034464	151113176	78712
BM691	2H	67.8931	151113177	151255592	142415
BM688	2H	67.8931	151255593	151769486	513893
BM687	2H	67.8931	151769487	152217873	448386
BM686	2H	67.8931	152217874	152376788	158914
BM690	2H	67.8931	152376789	152862932	486143
BM692	2H	67.8931	152862933	153034902	171969
BM693	2H	67.8931	153034903	154043719	1008816
BM695	2H	67.8931	154043720	154289255	245535
BM694	2H	67.8931	154289256	155028885	739629
BM699	2H	68.1943	155028886	155047437	18551
BM697	2H	68.1943	155047438	155216809	169371
BM700	2H	68.1943	155216810	155785588	568778
BM696	2H	68.1943	155785589	155927015	141426
BM698	2H	68.1943	155927016	156339141	412125
BM701	2H	68.1943	156339142	156751683	412541
BM702	2H	68.1943	156751684	156815167	63483
BM703	2H	68.1943	156815168	156909332	94164
BM705	2H	68.1943	156909333	157086555	177222
BM704	2H	68.1943	157086556	157490447	403891
BM709	2H	68.4973	157490448	157602630	112182
BM708	2H	68.4973	157602631	157625147	22516
BM707	2H	68.4973	157625148	157752824	127676
BM706	2H	68.4973	157752825	157760193	7368
BM710	2H	68.4973	157760194	157766288	6094
BM711	2H	68.4973	157766289	157879636	113347
BM715	2H	68.4973	157879637	157891345	11708
BM716	2H	68.4973	157891346	157953539	62193
BM717	2H	68.4973	157953540	157995451	41911
BM712	2H	68.4973	157995452	158080855	85403
BM714	2H	68.4973	158080856	158139928	59072
BM713	2H	68.4973	158139929	158178035	38106
BM719	2H	68.4973	158178036	158194187	16151
BM718	2H	68.4973	158194188	158260353	66165
BM720	2H	68.4973	158260354	158350920	90566
BM721	2H	68.8003	158350921	158420619	69698
BM722	2H	68.8003	158420620	158535000	114380
BM723	2H	68.8003	158535001	158772931	237930
BM725	2H	68.8003	158772932	158907411	134479
BM729	2H	68.8003	158907412	159084770	177358
BM724	2H	68.8003	159084771	159220300	135529
BM727	2H	68.8003	159220301	159263735	43434
BM726	2H	68.8003	159263736	159351017	87281
BM728	2H	68.8003	159351018	159567812	216794
BM730	2H	68.8003	159567813	159597713	29900
BM735	2H	68.8003	159597714	159649568	51854
BM734	2H	68.8003	159649569	159664458	14889
BM733	2H	68.8003	159664459	159780535	116076
BM738	2H	68.8003	159780536	159791800	11264
BM732	2H	68.8003	159791801	160280294	488493
BM737	2H	68.8003	160280295	160325988	45693
BM731	2H	68.8003	160325989	160473615	147626
BM736	2H	68.8003	160473616	160486901	13285
BM740	2H	68.8003	160486902	160669100	182198
BM739	2H	68.8003	160669101	160776178	107077
BM742	2H	68.8003	160776179	160937392	161213
BM741	2H	68.8003	160937393	161133325	195932
BM743	2H	68.8003	161133326	161416573	283247
BM746	2H	68.8003	161416574	161565979	149405
BM745	2H	68.8003	161565980	161622076	56096
BM744	2H	68.8003	161622077	161694781	72704
BM748	2H	68.8003	161694782	161763397	68615
BM747	2H	68.8003	161763398	161826442	63044
BM749	2H	68.8003	161826443	162099080	272637
BM750	2H	68.8003	162099081	162125321	26240
BM752	2H	68.8003	162125322	162513900	388578
BM751	2H	68.8003	162513901	163324849	810948
BM753	2H	69.1015	163324850	163429441	104591
BM754	2H	69.1015	163429442	163675637	246195
BM755	2H	69.1015	163675638	163714588	38950
BM756	2H	69.1015	163714589	163726044	11455
BM757	2H	69.1015	163726045	163926123	200078
BM759	2H	69.1015	163926124	164001965	75841
BM761	2H	69.1015	164001966	164090900	88934
BM758	2H	69.1015	164090901	164170232	79331
BM760	2H	69.1015	164170233	164204080	33847
BM762	2H	69.1015	164204081	164347597	143516
BM763	2H	69.1015	164347598	164503812	156214
BM764	2H	69.1015	164503813	164658876	155063
BM767	2H	69.1015	164658877	164845565	186688
BM768	2H	69.1015	164845566	164953398	107832
BM765	2H	69.1015	164953399	165031720	78321
BM769	2H	69.1015	165031721	165127521	95800
BM766	2H	69.1015	165127522	165219742	92220
BM770	2H	69.1015	165219743	165407039	187296
BM771	2H	69.1015	165407040	165585131	178091
BM772	2H	69.1015	165585132	165675287	90155
BM775	2H	69.1015	165675288	165904269	228981
BM774	2H	69.1015	165904270	166006171	101901
BM773	2H	69.1015	166006172	166053030	46858
BM777	2H	69.1015	166053031	166112896	59865
BM776	2H	69.1015	166112897	166221839	108942
BM778	2H	69.1015	166221840	166292737	70897
BM780	2H	69.1015	166292738	166345089	52351
BM779	2H	69.1015	166345090	166380103	35013
BM783	2H	69.1015	166380104	166389458	9354
BM786	2H	69.1015	166389459	166505096	115637
BM781	2H	69.1015	166505097	166603074	97977
BM785	2H	69.1015	166603075	166620733	17658
BM782	2H	69.1015	166620734	166706729	85995
BM784	2H	69.1015	166706730	166750134	43404
BM787	2H	69.1015	166750135	166807848	57713
BM788	2H	69.1015	166807849	167034243	226394
BM789	2H	69.4064	167034244	167339392	305148
BM791	2H	69.4064	167339393	167760600	421207
BM795	2H	69.4064	167760601	167844136	83535
BM794	2H	69.4064	167844137	167876098	31961
BM793	2H	69.4064	167876099	167987005	110906
BM790	2H	69.4064	167987006	168015120	28114
BM792	2H	69.4064	168015121	168150427	135306
BM799	2H	69.4064	168150428	168518066	367638
BM796	2H	69.4064	168518067	169053156	535089
BM798	2H	69.4064	169053157	169108555	55398
BM800	2H	69.4064	169108556	169349295	240739
BM797	2H	69.4064	169349296	169539860	190564
BM801	2H	69.4064	169539861	169760604	220743
BM805	2H	69.4064	169760605	169983818	223213
BM806	2H	69.4064	169983819	170023033	39214
BM808	2H	69.4064	170023034	170349970	326936
BM802	2H	69.4064	170349971	170605682	255711
BM807	2H	69.4064	170605683	170611907	6224
BM803	2H	69.4064	170611908	170668014	56106
BM804	2H	69.4064	170668015	171277071	609056
BM809	2H	69.4064	171277072	171398948	121876
BM814	2H	69.4064	171398949	171468395	69446
BM813	2H	69.4064	171468396	171550411	82015
BM816	2H	69.4064	171550412	171591329	40917
BM815	2H	69.4064	171591330	171658020	66690
BM817	2H	69.4064	171658021	171804693	146672
BM812	2H	69.4064	171804694	172190404	385710
BM811	2H	69.4064	172190405	172294461	104056
BM810	2H	69.4064	172294462	172453547	159085
BM822	2H	69.4064	172453548	172493471	39923
BM821	2H	69.4064	172493472	173816773	1323301
BM818	2H	69.4064	173816774	173841458	24684
BM819	2H	69.4064	173841459	173890014	48555
BM823	2H	69.4064	173890015	173970665	80650
BM820	2H	69.4064	173970666	174180802	210136
[truncated: 10,907 more rows]
